# Supplementary material for: The importance of parameterization when simulating the hydrologicresponse of vegetative land-use change
Source: Copernicus journal article supplement (doi:10.5194/hess-2017-111), 2017-03-01
Supplement: Supplementary file [file hess-2017-111-AC1-supplement.pdf]

# The importance of parameterization when simulating the hydrologic response of vegetative land-cover change

Jeremy White<sup>1</sup>, Victoria Stengel<sup>1</sup>, Samuel Rendon<sup>1</sup>, and John Banta<sup>1</sup>

<sup>1</sup>U.S. Geological Survey, Austin TX, 78754

*Correspondence to:* Jeremy White (jwhite@usgs.gov)

**Abstract.** Computer models of hydrologic systems are frequently used to investigate the hydrologic response of land-cover change. If the modeling results are used to inform resource-management decisions, then providing robust estimates of uncertainty in the simulated response is an important consideration. Here we examine the importance of parameterization, a necessarily subjective process, on uncertainty estimates of the simulated hydrologic response of land-cover change. Specifically, we applied the soil water assessment tool (SWAT) model to a 1.4 km<sup>2</sup> watershed in south Texas to investigate the simulated hydrologic response of brush management (the mechanical removal of woody plants), a discrete land-cover change. The watershed was instrumented before and after brush-management activities were undertaken and estimates of precipitation, streamflow, and evapotranspiration (ET) are available; these data were used to condition and verify the model. The role of parameterization in brush-management simulation was evaluated by constructing two models, one with 12 adjustable parameters (reduced parameterization) and one with 1,305 adjustable parameters (full parameterization). Both models were subjected to global sensitivity analysis as well as Monte Carlo and generalized likelihood uncertainty estimation (GLUE) conditioning to identify important model inputs and to estimate uncertainty in several quantities of interest related to brush management. Many realizations from both parameterizations were identified as “behavioral” in that they reproduce daily mean streamflow acceptably well according to Nash-Sutcliffe model efficiency coefficient, percent bias, and coefficient of determination. However, the total volumetric ET difference resulting from simulated brush management remains highly uncertain after conditioning to daily mean streamflow, indicating that streamflow data alone are not sufficient to inform the model inputs that most influence the simulated outcomes of brush management. Additionally, the reduced-parameterization model grossly underestimates uncertainty in the total volumetric ET difference compared to the full-parameterization model; total volumetric ET difference is a primary metric for evaluating the outcomes of brush management. The failure of the reduced-parameterization model to provide robust uncertainty estimates demonstrates the importance of parameterization when attempting to quantify uncertainty in land-cover change simulations.

## 1 Introduction

Keywords

25 – brush management

- land-cover change
- uncertainty analysis
- parameterization
- SWAT

## 5 Highlights

- simulated outcome of brush management, a land-cover change, is largely uncertain
- a large number of model inputs influence the simulated outcomes of brush management
- level of parameterization does not affect fit to daily mean streamflow data
- level of parameterization does affect uncertainty estimates in quantities of interest

- 10 An important use for computer models of hydrologic systems is simulation of the hydrologic response of land-cover change (Fohrer et al., 2001; DeFries and Eshleman, 2004); many modeling analyses have been undertaken in attempt to better understand how changes in land cover may change the timing and quantity of runoff, recharge, and evapotranspiration (e.g., Schilling et al. (2014); Ahn and Merwade (2017); Chu et al. (2010)). Given the uncertainties that exist in nearly every hydrologic model input dataset, the potential exists for the simulated outcomes to be highly uncertain, even after conditioning to streamflow data.
- 15 Given this potential uncertainty in model outcomes, quantifying uncertainty in the simulated results of land-cover change is an important consideration, especially if simulation results are to be used in resource management decision making.

Previous research has shown that the subjective process of selecting which model inputs to treat as uncertain (e.g. parameterization) may affect uncertainty estimates in model outcomes (White et al., 2014). Herein, parameterization refers to the subjective and necessary process of selecting uncertain model inputs to treat as adjustable in the conditioning process.

- 20 We investigate how parameterization may affect the uncertainty quantification process when simulating a discrete, vegetative land-cover change, the mechanical removal of woody plants.

Woody plant encroachment into grasslands has been a worldwide phenomena in the past 150 years (Archer et al., 2011). This encroachment has several ramifications to the ecosystem, including changes to the hydrologic function and response of the surface-water basins (Archer et al., 2011). Woody species are commonly thought to consume a larger quantity of water (by transpiration) in comparison to native grasses (Tennesen, 2008). By removing the woody species and allowing native grasses to reestablish in the area (commonly referred to as "brush management"), changes in the hydrology in the watershed might occur (U.S. Department of Agriculture, 2009).

Many hydrologic modeling analyses have been completed to evaluate the feasibility of applying brush management in order to decrease the quantity of water transpired within a given watershed. (Ben Wu et al., 2001; Lemberg et al., 2002; Brown and Raines, 2002; Afinowicz et al., 2005; Bumgarner and Thompson, 2012; Harwell et al., 2016). However, to date (2017), very few, if any, of the modeling-based, brush management feasibility studies have included uncertainty estimation in the

simulated hydrologic response of brush management, even though substantial uncertainty in other applications of the soil water assessment tool (SWAT) model have been reported (Gassman et al., 2014).

To demonstrate the utility of including uncertainty estimation and to investigate how parameterization may affect the reliability of a model to resolve the hydrologic outcomes of simulated land-cover changes, such as brush management, the soil water assessment tool (SWAT) (Arnold et al., 1998) was applied to a 1.4 km<sup>2</sup> watershed in South Texas. The same watershed assessed in this study was subject of a previous investigation in which multiple types of data (precipitation, streamflow, and evapotranspiration [ET]) were collected (Banta and Slattery, 2011). The objectives of our study are to (1) assess the reliability of a computer model to simulate pre- and post-treatment water budget components in the context of uncertainty, and (2) evaluate the role of model parameterization in the uncertainty estimation process by investigating the number of model inputs that influence the important model outputs.

## 1.1 Hydrologic Setting

The brush-management simulation described herein is applied to a 1.4 km<sup>2</sup> watershed in the Honeycreek State Natural Area in South Texas (Figure 1). For a complete description of the study area, see Banta and Slattery (2011). Note the watershed analyzed in this study is referred to as the “treatment watershed” in Banta and Slattery (2011).

According to Banta and Slattery (2011), long-term average precipitation near the watershed is 34 inches per year and is equally distributed throughout the calendar year. The watershed generally has gentle slopes (less than 5 percent) with steeper slopes in the stream channel ravines. Clay and clay loam soils overlie the Trinity aquifer outcrop in the watershed; the Trinity aquifer is a regional karst aquifer system (Banta and Slattery, 2011). Before brush management was implemented, the watershed was largely dominated by *Juniperus ashei* (ashe juniper). Approximately 40% of the ashe juniper land cover was mechanically cleared from the watershed during calendar year 2004 (Homer et al., 2007). The watershed configuration before removal of 40% of the ashe juniper is referred to as the "pre-treatment" configuration. Following ashe-juniper removal, the land returned to a native rangeland land-cover type (referred to hereinafter as the "post-treatment" configuration).

## 2 Model Construction

The SWAT model was used to simulate the hydrologic response of the watershed, including the effects of brush management. Specifically a SWAT2012 (Arnold et al., 2012b, a) model of the watershed was built using the ArcSWAT tool (Winchell et al., 2007). The resulting model files were incorporated into the model-independent framework of PEST++ V3 (Welter et al., 2015) to facilitate programmatic interaction with the model so that any model input quantity could be treated as a parameter and a variety of model outputs, including derived and processed quantities, can be included in the modeling analysis.

### 2.1 Datasets

Three datasets were needed to apply the ArcSWAT tool (Winchell et al., 2007), which discretized the watershed into hydrologic response units (HRUs):

- digital elevation model: The 10m National Elevation Dataset (NED) (Maune et al., 2007)
- soil data: The Soil Survey Geographic Database (SSURGO) (Staff, 2016)
- land-cover type: The National Land Cover Database (NLCD) (Homer et al., 2007)

5 These three datasets were used within the ArcSWAT tool to find unique land slope/soil/land cover combinations across the watershed. These unique combinations became HRUs in the SWAT model. The NED digital elevation model for the watershed was smoothed with a 4-pixel width averaging kernel to remove apparent artifacts.

As part of the previous study that evaluated the effects of brush management at the Honey Creek State Natural Area (Banta and Slattery, 2011), daily total precipitation and ET, and daily mean streamflow were measured during 2001–10 (Figure 2). The methods used to collect the input datasets are described in Banta and Slattery (2011). The precipitation data were used as inputs  
10 to the SWAT model whereas the ET and streamflow data were used for conditioning and model evaluation (described below). Because the SWAT model is sensitive to precipitation intensity, the original 5-minute measurements from four precipitation measurement stations in the study area were combined via arithmetic averaging to develop the precipitation input dataset—the averaging was needed to account for missing data caused by instrument issues in order to form a complete precipitation dataset. The National Centers for Environmental Prediction (NCEP) Climate Forecast System Reanalysis (CFSR) (Saha et al., 2014)  
15 Global Weather Database was used in the SWAT simulation as the input for weather data when on-site precipitation data were not available (Banta and Slattery, 2011). To account for errors induced by averaging precipitation data and the use of lower-resolution NCEP precipitation data, we treat precipitation as uncertain; the treatment of model inputs as uncertain is discussed in detail in the Parameterization section.

## 2.2 ArcSWAT

20 The ArcSWAT tool (Winchell et al., 2007) was used with the previously-described datasets to construct a SWAT2012 model of the watershed. Surface runoff is simulated with SWAT using the Green-Ampt excess rainfall method (Mein and Larson, 1973; Jeong et al., 2010).

The NLCD 2001 (Homer et al., 2007) land-cover data were modified so that areas of mixed brush-rangeland within the watershed were reclassified as rangeland, which is consistent with site-specific knowledge (Banta and Slattery, 2011).

25 The application of the ArcSWAT tool with the previously-described datasets resulted in a model with a single subbasin covering the 1.4 km<sup>2</sup> watershed study area with 47 distinct HRUs (Figure 1). A summary of the HRU characteristics is included in Table S1 of the supplementary material; the detailed HRU characteristics obtained by applying the ArcSWAT tool are included in the associated data release (White et al., 2017).

## 2.3 Model Configurations

30 The modeling analysis described herein includes two specific simulation periods that correspond to the pre-treatment and post-treatment configurations:

– **conditioning period:** 1 January 2002 to 31 December 2003 (pre-treatment configuration)

– **forecast period:** 1 January 2005 to 31 December 2010 (post-treatment configuration)

The conditioning period and forecast period models simulate years 2001 and 2004, respectively; the initial year of simulation for each model is used as a model warm-up period to remove any transient artifacts from initial conditions.

5 In a typical modeling feasibility study, the model is constructed and conditioned to pre-treatment (conditioning period) system states, then forecasts are made using the model related to how simulated brush management will affect the hydrology within the watershed.

Here, two distinct SWAT models were constructed. The first SWAT model simulated the pre-treatment configuration and is hereinafter referred to as the “pre-treatment” model. The second SWAT model simulated the post-treatment configuration and is hereinafter referred to as the “post-treatment” model. The only difference between the two SWAT models are specific inputs to HRUs 18, 20, 22, 32, which represented the area of watershed that was converted from evergreen forest (e.g., ashe juniper) to rangeland. Modifications to the input files for the listed HRUs were (herein, references to specific SWAT input variables are shown in all caps):

– maximum canopy interception - the CANMX variable in the .HRU input files

15 – plant growth cycle - the PLANT\_ID and HEAT\_UNITS variables in the .MGT input files

In this study, brush management is simulated by modifying the maximum canopy storage and inputs that control the simulated growth cycle for a representative area of the subbasin from evergreen forest to rangeland because this required few assumptions and allowed injection of the desired uncertainty into the simulation workflow. We modified the maximum canopy storage and the plant growth aspects of HRUs 18, 20, 22, and 32 because these inputs directly affect the available precipitation for partitioning and simulated ET processes, respectively, whereas plant-growth variables affect the timing and intensity of simulated ET processes related to the annual plant-growth cycle. In the pre-treatment model, these model inputs were specified to represent ashe juniper land cover for HRUs 18, 20, 22, 32, whereas in the post-treatment model, these inputs for HRUs 18, 20, 22, 32 were specified to represent rangeland land cover, effectively capturing the change in the simulated inputs that corresponds to the brush-management operations that occurred during 2004. See the SWAT theory (Neitsch et al., 2011) and input-output documentation (Arnold et al., 2012a) for more information on the model inputs listed in the .HRU and .MGT files.

## 2.4 Parameterization

Parameterization is a critical part of any modeling analysis and has received considerable attention in the literature (Abbaspour et al., 2004; Romanowicz et al., 2005; Sexton et al., 2011; Zhenyao et al., 2013; Migliaccio and Chaubey, 2008; Cibir et al., 2010; Gitau and Chaubey, 2010; Du et al., 2013; Malone et al., 2015; Zhang et al., 2016). In this analysis, we investigated two parameterization designs:

– **reduced parameterization** uses the 12 model inputs listed on Table 1 of Arnold et al. (2012b) to represent model input uncertainty. These 12 model inputs are the most cited SWAT model inputs treated as parameters when simulating surface-

water runoff and base-flow processes (Arnold et al., 2012b). The reduced parameterization was, therefore, representative of many SWAT modeling analyses in the literature. For the reduced parameterization model, inputs were adjusted at the watershed scale—that is, all 47 HRUs receive the same value for each of these 12 model inputs (Table 1).

– **full parameterization** used 1,305 model inputs. It builds on the 12 parameters of the reduced parameterization by adding unique multiplier parameters at the HRU scale for each of the 12 parameters in Table 1, and also includes many other model inputs that are not typically adjusted, albeit still uncertain, such as soil properties, and inputs that govern the simulation of plant growth, such as leaf area index (LAI) variables. The full parameterization also includes annual quartile precipitation multipliers to account for uncertainty and potential bias in precipitation estimates (Leta et al., 2015; Renard et al., 2011; Kavetski et al., 2006; Kuczera et al., 2006). See Table S1 of the Supplementary Material for a summary of the full parameterization and the associated data release (White et al., 2017) for a complete description of the full parameterization.

These two parameterizations represent different approaches to hydrologic modeling. From a computational standpoint, the reduced parameterization is more desirable, whereas the full parameterization offers the opportunity for a more complete expression of model input uncertainty.

The SWAT input CANMX is of particular importance in simulating brush management because it controls how much precipitation is available for partitioning, and it is directly affected by land-cover changes. Therefore, CANMX potentially exhibits a strong control of the simulated outcomes of brush management. CANMX is not treated as uncertain in the reduced parameterization as it is not commonly treated as adjustable (Arnold et al., 2012b). However, CANMX is included in the full parameterization and is parameterized as follows (herein, references to specific parameters are shown in italics):

- the parameter *canmx\_v* represents the maximum canopy storage for evergreen forest land-cover type HRUs;
- the parameter *canmxfac\_07* represents the portion of *canmx\_v* that is applied to deciduous forest land-cover type HRUs; and
- the parameter *canmxfac\_15* represents the portion of *canmx\_v* that is applied to rangeland land-cover type HRUs.

In this way, we can incorporate uncertainty in the values of CANMX for all three land-cover types while also enforcing the relations we expect for the maximum canopy storage between the land cover types. This treatment for CANMX allows both the pre- and post-treatment models to receive the same parameter values for the same land-cover types. Because HRUs 18, 20, 22 and 32 switch from evergreen land cover to rangeland land cover, the CANMX values assigned to these HRUs is in harmony with the CANMX values assigned to other HRUs. The HRUs-scale multipliers, named *canmx\_XX*, where *XX* is the HRU number, still account for HRU-scale variability in CANMX for HRUs of the same land cover type. In the reduced parameterization, the parameters *canmx\_v*, *canmxfac\_07* and *canmxfac\_15* are specified values of 13.0 mm, 0.625 times 13.0 mm (8.13 mm) and 0.25 times 13.0 mm (3.25 mm), respectively, which corresponds to the midpoint of the respective parameter ranges.

The upper and lower bound of each parameter was defined using a combination of literature values (Abbaspour, 2015; Douglas-Mankin et al., 2010) and expert knowledge. Collectively, the upper and lower bounds of each parameter forms a multivariate uniform distribution (hereinafter referred to as the “Prior”). Conceptually, the “Prior” is the distribution of “acceptable” parameter values based on hydrologic system knowledge. The upper and lower bound of each parameter is summarized in Table S1 of the Supplementary Material; The upper and lower bounds of the reduced parameterization are distilled on Table 1.

## 2.5 Model interface

Both the pre- and post-treatment SWAT models must be evaluated repeatedly to simulate hydrologic outcomes of brush management and evaluate the importance of parameterization in said outcomes. To accomplish this repeated evaluation, a model-independent interface to SWAT was constructed. This interface facilitated the translation of parameter values into SWAT model inputs files, the execution of both the pre- and post-treatment SWAT models, and the post-processing of SWAT model output into quantities of interest.

To translate parameter values to SWAT model input files, parameters were assigned two characteristics:

1. Scale: a given parameter is either subbasin scale or HRU scale. Subbasin-scale parameters are applied to all 47 HRUs, whereas an HRU-scale parameter applies only to a specific HRU.
2. Type: a given parameter is either a multiplier-type parameter or a value-type parameter. Multiplier-type parameters are treated as scaling factors against the original SWAT model input variable(s), whereas value-type parameters replace the original SWAT model input variables(s).

The following steps represent a single model evaluation in the model interface:

1. Construct two “base” tables of HRU-scale inputs where the columns are the SWAT model inputs names and the rows are the 47 HRUs (one table for the pre-treatment model and one table for the post-treatment model). Populate these tables with the base input values from the ArcSWAT tool.
2. For each value-type, subbasin-scale parameter, replace the values in the base tables for each corresponding column with the specified parameter value, assigning all HRUs the same value.
3. For each multiplier-type, subbasin-scale parameter, multiply the corresponding column of the base tables by the specified parameter value, scaling all HRUs by the same value.
4. Apply *canmx\_v*, *canmxfac\_07* and *canmxfac\_15* parameters to the CANMX column of both base tables according to the land cover type of each HRU using the previously-described relation between these parameters.
5. For each multiplier-type, HRU-scale parameter, multiply the corresponding row-column location in the base tables by the specified parameter value, scaling only a single entry in the table.
6. Translate the base tables into the appropriate SWAT input files for both the pre- and post-treatment models.

7. Apply precipitation multiplier parameters and write a new SWAT .PCP input file (Arnold et al., 2012a).
8. Apply plant-growth multiplier parameters and write a new SWAT plant-growth database file.
9. Run the pre-treatment model for 2001 through 2010 (the pre-treatment model outputs are needed from 2005–10 for calculation of brush-management quantities of interest).
- 5 10. Run the post-treatment model for 2004 through 2010.
11. Post-process both model runs to formulate brush-management quantities of interest and conditioning measures (described in the Evaluation of Brush Management Simulations section).

The forward run process was completed many times as part of both the global sensitivity analysis and the uncertainty analysis (described in the Evaluation of Brush Management Simulations). For the reduced parameterization, the HRU-scale parameters, precipitation parameters, and plant growth parameters were each assigned a value of 1.0, effectively removing the influence of these parameters on the model outputs.

## 2.6 Evaluation of Brush Management Simulations

We used uncertainty quantification techniques to investigate how well the previously-described SWAT models simulate the effects of brush management on long-term water budget components. Specifically, after applying the global sensitivity analysis (GSA) method of Morris (Morris, 1991) (hereinafter referred to as the “method of Morris”), we used Monte Carlo analysis (MC) in conjunction with Generalized Likelihood Uncertainty Estimation (GLUE) (Beven and Binley, 1992) to construct prior and behavioral distributions for several model outputs that are important to simulating the outcomes of brush management, which we term quantities of interest (QOIs).

## 2.7 Quantities of Interest

- 20 Output from both the pre- and post-treatment model was processed into QOIs that encompass the simulated pre- and post-treatment long-term water budget components in the simulated watershed:
- **QOI-1:** volumetric conditioning-period (pre-treatment) ET-precipitation ratio
  - **QOI-2:** volumetric conditioning-period (pre-treatment) streamflow-precipitation ratio
  - **QOI-3:** volumetric forecast-period (post-treatment) ET-precipitation ratio
  - 25 – **QOI-4:** volumetric forecast-period (post-treatment) streamflow-precipitation ratio
  - **QOI-5:** volumetric forecast-period difference between the simulated treated and untreated watershed



The work of Banta and Slattery (2011) includes daily mean streamflow and daily total ET for the watershed during the forecast (post-treatment) period, which means measured values for QOI-1 through QOI-4 are available. Post-treatment streamflow measurements as well as pre- and post-treatment ET measurements are not available in most real-world applications of modeling to support brush management activities. Therefore, we treat QOI-1 through QOI-4 as verification measures to check how well the model reproduces long-term water-budget components, measures that are related to simulating the feasibility of brush management.

QOI-5 is the primary quantity we use to evaluate the effectiveness of brush management: how does the simulated long-term volumetric ET change as a result of brush management? QOI-5 is simulated by running the pre- and post-treatment models for 2004 to 2010 and summing the differences in simulated ET between the two simulations.

## 2.8 Monte Carlo and GLUE

Monte Carlo analysis (MC) (Tarantola, 2005) was used to investigate the effects of SWAT model input uncertainty on brush-management QOIs. MC was chosen because it employs few assumptions and because the forward model run time is relatively short.

To perform the MC analysis, a one-million parameter set ensemble was drawn from the “Prior” for each of 1,305 elements of the full parameterization using the python module pyEMU (White et al., 2016). Note the upper and lower bound of each parameter are provided in the data release (White et al., 2017) and are summarized in Table S1 in the Supplementary Material. Once the prior parameter ensemble was constructed, the SWEEP utility of the PEST++ software suite (Welter et al., 2015) was used to run the pre- and post-treatment SWAT models for each of the one million realized parameter sets in a distributed, parallel environment using the steps described in the Model Interface section. The result of this process yielded one million values for each of the conditioning measures and brush-management QOIs.

The reduced parameterization was evaluated in a similar fashion. The full-parameterization prior ensemble was modified so that the value of each parameter that was not included in reduced parameterization was fixed at the value representing the midpoint of the parameter’s range. In this way, parameters not included in the full parameterization were treated as if they were not in the analysis and are instead “fixed” or “known” model inputs—just as they would be treated in a modeling analysis that only adjusted the 12 inputs of the reduced parameterization. Whereas the midpoint values of the fixed parameters may not be “best” in the sense that they reduce model-to-measurement misfit, they are nonetheless centered within the range of plausibility as described by the “Prior”.

The reduced-parameterization prior ensemble was also evaluated using the SWEEP utility in a distributed parallel environment, yielding one million values for each of the conditioning measures and brush-management QOIs.

Once the prior ensembles of both the reduced and full parameterizations were evaluated, the GLUE method of Beven and Binley (1992) was used to condition the prior ensembles. The GLUE method was selected because it accommodates a subjective likelihood function, which allows the conditioning process to be flexible and can simultaneously accommodate several criteria (Beven and Binley, 1992). In this study, the behavioral parameter ensembles are a subset of prior parameter

ensembles which meet three criteria (herein referred to as conditioning measures). Following Moriasi et al. (2007), we selected the following conditioning measures, which are based on daily mean streamflow, to form the behavioral ensemble:

- **CM-1** conditioning-period (pre-treatment) Nash-Sutcliffe model efficiency coefficient (NSE) > 0.75
- **CM-2** conditioning-period (pre-treatment) percent bias < 5%
- 5 – **CM-3** conditioning-period (pre-treatment) coefficient of determination ( $R^2$ ) > 0.85

These conditioning measures are widely used to judge a hydrologic model's ability to reproduce observed daily mean streamflow (Moriasi et al., 2007). Briefly, NSE is a statistic that determines the relative magnitude of simulated residual variance to the observed variance (Nash and Sutcliffe, 1970). Percent bias measures the tendency of the model to systematically over or under simulate the observed data, whereas the coefficient of determination measures the colinearity between simulated and observed pairs. By using all three of these conditioning measures simultaneously, the parameter realizations that “best” reproduce different facets of the observed streamflow data are identified.

Realizations in each of the prior ensembles that satisfied all three of conditioning measures are designated as “behavioral” and, taken together, comprise the reduced and full parameterization behavioral ensembles, respectively. These behavioral ensembles represent parameter realizations that respect the “Prior” but that also reproduce daily mean streamflow acceptably well according to the three conditioning measures. That is, each parameter realization in the full- and reduced-parameterization behavioral ensembles can be considered “calibrated” in that each of these parameter realizations results in simulated daily mean streamflow that acceptably match the observed data according to the three conditioning measures.

## 2.9 Global Sensitivity Analysis

Given the large difference in the number of parameters between the reduced (12) and full (1,305) parameterizations, the interested reader may be wondering how many of members of the reduced and full parameterizations influence either the conditioning measures or the QOIs or both. In an effort to address this question, we employed the method of Morris (Morris, 1991) which is a “one-at-a-time” GSA method; each parameter is varied, in turn, across the specified range, effectively sampling the sensitivity of QOIs and conditioning measures across parameter space. We used the model independent implementation of the method of Morris encoded in GSA utility of the PEST++ software suite (Morris, 1991; Welter et al., 2015) with 20 discretization points across the range of each parameter.

## 3 Results

The application of the method of Morris (Morris, 1991) reveals a considerable number of model inputs that influence the conditioning measures as well as the designated brush-management QOIs. Furthermore, the combined Monte Carlo and associated GLUE-based conditioning process (MC-GLUE) analysis reveals a relatively large difference in the estimated range of QOI-5 between the reduced and full parameterization models.

### 3.1 Global Sensitivity Analysis

Of the 1,305 model inputs treated as parameters, the method of Morris analysis indicates only 194 parameters are non-influential to the three conditioning measures and five brush-management QOIs (See the Supplementary Material for a complete summary of the GSA results, including a table of the five most influential parameters for each QOI and conditioning measure [Tables S2 and S3]). Note that many of the most influential parameters, specifically precipitation multipliers, plant growth parameters, and HRU-scale parameters, are not in the reduced parameterization and are not included in typical hydrologic modeling analyses (Arnold et al., 2012b).

### 3.2 Monte Carlo

The MC-GLUE analysis yielded 7,155 and 6,846 realizations (out of the 1 million member prior ensembles) that compose the behavioral ensembles for the reduced and full parameterizations, respectively. These behavioral ensembles reproduce the pre-treatment daily mean streamflow data acceptably well according to the three conditioning measures. The relation of prior and behavioral ensembles to the three conditioning measures for the reduced and full parameterizations can be seen graphically on Figure 3. The diagonal panes of Figure 3 show the histograms of each of the three conditioning measures, whereas the off-diagonal panes show the relation between conditioning measures. Parameter realizations within the hatched boxes on Figure 3 collectively form the behavioral ensembles for both the reduced and full parameterization.

#### 3.2.1 Verification QOIs

In general, for both the reduced and full parameterizations, the behavioral distributions for ET-based QOIs (QOI-1 and QOI-3) are similar to prior distributions; conditioning has slightly shifted the distributions towards larger precipitation-ET ratios but has not substantially decreased the width of the distributions. The similarity between prior and behavioral distributions indicates the conditioning process has not changed the uncertainty that exists in model simulated ET. The prior and behavioral distributions of reduced and full parameterizations bracket the measured value for QOI-1, QOI-2 and QOI-3 at the 95% confidence level (Figures 4, 5, and 6).

QOIs related to streamflow (QOI-2 and QOI-4) have markedly different behavioral distributions compared to prior distributions, indicating considerable conditioning of streamflow-sensitive parameters. The measured value for QOI-4 (volumetric forecast-period [post-treatment] streamflow-precipitation ratio) was not bracketed at the 95% confidence level by either behavioral distribution or the prior distribution of the reduced parameterization (Figure 7).

#### 3.2.2 Forecast QOI

The prior uncertainty in the QOI-5 (the simulated difference between the total forecast-period ET in the pre- and post-treatment models) was substantially larger for the full parameterization compared to the reduced parameterization (Figure 8): the reduced parameterization prior uncertainty ranged from approximately -4.1 to -2.1%, whereas the full parameterization model yielded a prior uncertainty that ranged from approximately -7.5 to +0.5%. Note a negative ET difference indicates a decrease in ET as

a result of simulated brush management. The larger range yielded by the full parameterization is a direct outcome of specifying more uncertain parameters that influence QOI-5.

QOI-5 behavioral uncertainty from the reduced parameterization is substantially different than the prior uncertainty; the 95% confidence interval of the reduced parameterization behavioral distribution ranges from -2.5 to -2.0%. The behavioral distribution of QOI-5 yielded by the full parameterization is similar to the prior distribution, but shifted slightly towards positive values; the 95% confidence interval of the full parameterization behavioral distribution ranges from -6.2 to +0.5% (Figure 8a). Only slight differences between the prior and behavioral distributions for the full parameterization, again, indicate the selected conditioning process did not substantially change the reliability in simulated long-term changes in ET as a result of brush management. We attribute the differences in QOI-5 distributions between the reduced and full parameterizations to the model error generated by using a reduced set of parameters to represent SWAT model input uncertainty. Note the prior distribution for the reduced parameterization was also non-parametric compared to the full parameterization counterpart, a numerical artifact we also attribute to the model error induced by the reduced parameterization.

#### 4 Discussion

The full-parameterization behavioral distribution of QOI-5 included a range of possible outcomes from a net decrease to a slight net increase in the ET component of the long-term water budget (Figure 8). This range of possible outcomes stems from the number of model inputs that were identified as uncertain and treated as parameters in the MC-GLUE analysis. The possibility of a net increase in ET following brush management is not unprecedented. Harwell et al. (2016) showed a net decrease in surface-water yield following simulated brush-management activities for one of their simulated subbasins. Furthermore, we have demonstrated that conditioning of a hydrologic model to daily mean streamflow does not necessarily increase the reliability of forecasts made with the model.

This study demonstrates the importance of robust uncertainty quantification to support simulations of brush management, and, more generally, simulating the hydrologic outcomes of land-cover change. Without uncertainty quantification, the simulated outcomes of simulating brush management are simply single points on the behavioral QOI distributions, which conveys no information related to the reliability of the model results. The failure of the reduced-parameterization model to provide robust uncertainty estimates demonstrates the importance of parameterization when attempting to quantify uncertainty in land-cover change simulations. The results of our analysis should not be directly extrapolated to other hydrologic settings that are different from the one described herein.

The MC-GLUE analysis showed that using a reduced parameterization to represent model input uncertainty leads to a misrepresentation and critical underestimation of the uncertainty in QOI-5, leading to artificially high confidence that brush-management activities will decrease the ET component of the water budget by approximately 2.0 to 2.5%. By including a more representative and complete set of parameters to represent model input uncertainty, the resulting QOI-5 uncertainty estimate more appropriately conveys the reliability in the modeled outcome of brush management.

A clear link between level of parameterization and uncertainty estimates for the simulated results of brush management has been demonstrated, and issues such as underestimation of uncertainty and numerical artifacts are shown to be associated with a reduced parameterization. Furthermore, the results of applying the method of Morris revealed more than 1,100 model inputs that were identified as uncertain and that also influence conditioning measures, QOIs or both. Following Sexton et al. (2011), parameters that influence the QOIs must be included in the uncertainty analysis, even if said parameters do not influence the likelihood function (e.g., they are not “identified” by the conditioning data). The demonstrated issues with the level of parameterization raise questions related to the concept of “overparameterization” (Jakeman and Hornberger, 1993) in the context of simulating the hydrologic outcomes of land-cover change. Each of the inputs that were selected for adjustment in the full-parameterization model were deemed uncertain at the start of the modeling analysis; whereas other practitioners may choose different prior distributions and/or ranges for these parameters, we doubt any practitioners would state these model inputs are known with certainty.

There are two avenues to reduce QOI-5 uncertainty: (1) collect information directly about the model input variables that most influence QOI-5—that is, reduce the prior uncertainty of the parameters that represent these inputs or (2) collect additional hydrologic observations that, through conditioning, reduce the uncertainty of parameters that influence QOI-5. We recognize that the ET observation data used to formulate QOI-1 could in fact be used as a condition measure. Given the similarity between QOI-1 and QOI-5, it is possible that the conditioning period ET data could be used to further condition several parameters that influence QOI-5, thereby reducing the behavioral uncertainty of QOI-5. However, the conditioning-period ET data provide a valuable validation of the model’s performance, and using these data as a conditioning measure would provide unique and atypical conditioning.

## 20 **5 Conclusions**

This study provided an analysis of the ability of a SWAT model to forecast how brush management affects the long-term water balance within a watershed. The analysis relies on measured streamflow and independently-derived evapotranspiration estimates to condition the parameterized model inputs as well provide a verification of the model’s performance during the forecast period. The method of Morris was used to investigate model input influence on conditioning measures and brush-management quantities of interest (QOIs). Following the method of Morris, Monte Carlo and GLUE analyses were used to estimate the uncertainty of brush-management QOIs for the reduced and full parameterization schemes.

Our analysis reveals the importance of robust uncertainty quantification when simulating the outcomes of brush management, especially as it relates to how the model is parameterized. Failure to specify a complete and encompassing parameterization is shown to lead to an underestimation of uncertainty in simulated brush-management outcomes, which may lead to suboptimal water resource decision making.

Given the number of identified uncertain model inputs and the associated specified uncertainty in said inputs, the model-simulated change in the long-term ET in the watershed is largely uncertain and includes a range of possible outcomes from a net negative to a slightly net positive change in long-term ET component of the water budget. The resulting uncertainty in one

of the primary metrics of brush-management effectiveness underscores the importance of robust and conservative uncertainty quantification. Watersheds with different hydrologic response characteristics will obviously behave differently, but, if modeling is used to evaluate brush-management outcomes, robust uncertainty quantification is needed to place the model results in a representative context.

## 5 6 Data availability

A data release that supports the analyses presented herein is available at <https://doi.org/10.5066/F7WH2NGR> (White et al., 2017). The data release includes files and data needed to reproduce our analyses, including:

1. ESRI ArcMAP 10.2.2 project that includes the ArcSWAT version 2012.10.2.18 project used to create the base model
2. base SWAT2012 input files generated by the ArcSWAT tool
- 10 3. PEST++ interface files including python pre- and post-processing scripts

The comma-separated value files used in the reduced and full parameterization Monte Carlo can be generated from the files provided in the data release (White et al., 2017). The ET, precipitation, and streamflow data used for conditioning and verification are available for download as the appendixes to Banta and Slattery (2011) at the U.S. Geological Survey Publication Warehouse (<http://pubs.usgs.gov/sir/2011/5226/>)

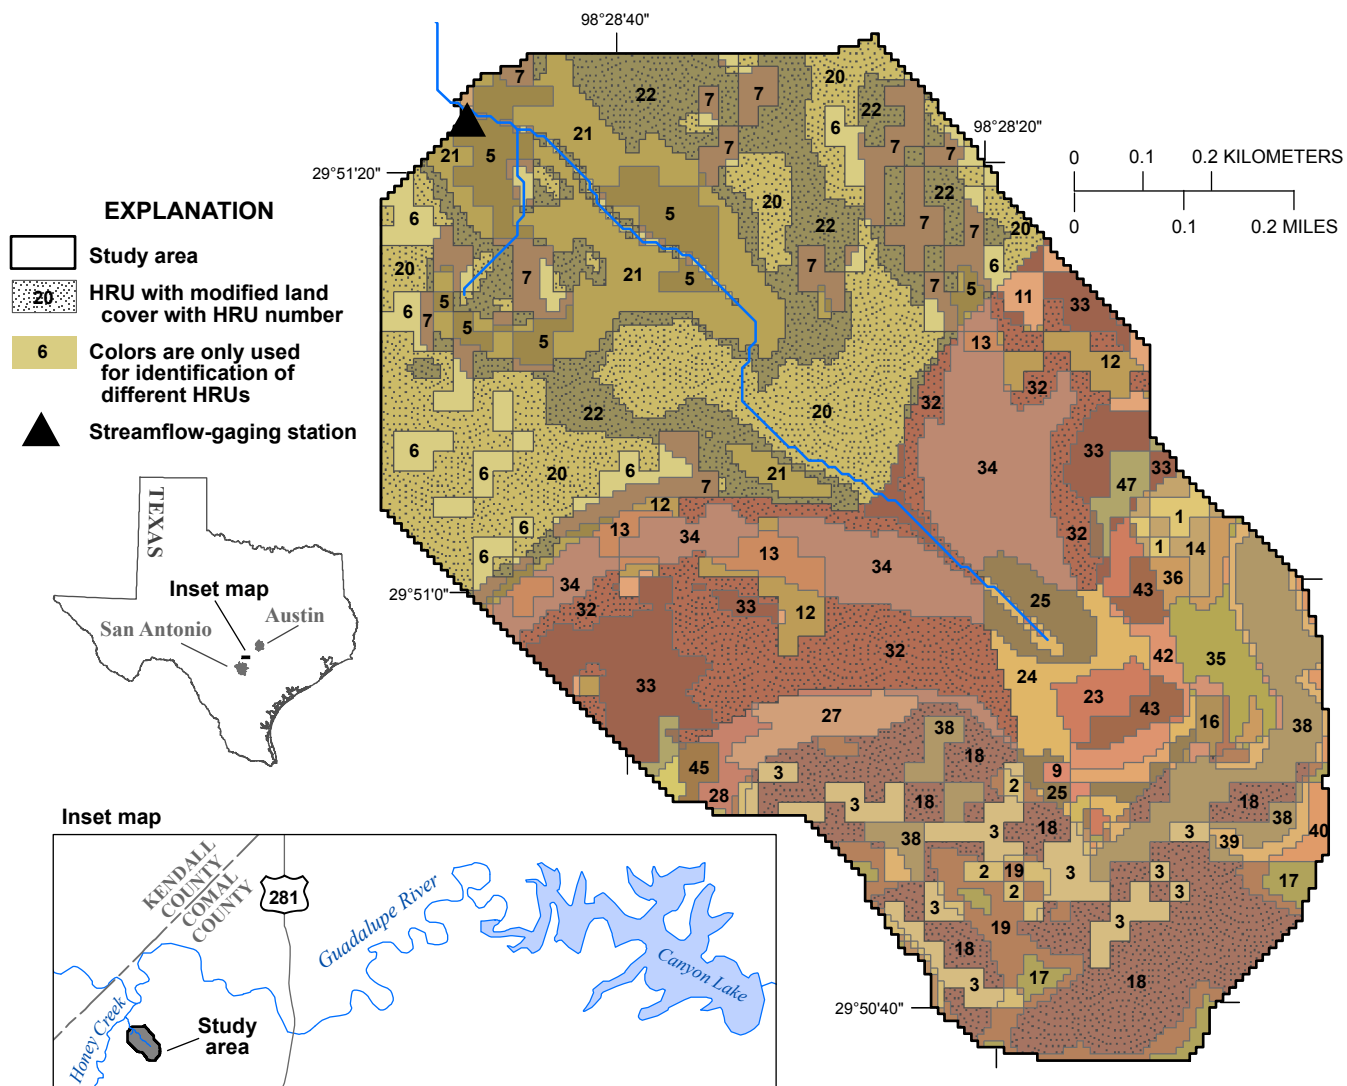

**Figure 1.** Study area and watershed location. The 47 HRUs yielded by the ArcSWAT tool (Winchell et al., 2007). The model inputs of HRUs 18, 20, 22, and 32 (stippled pattern) were modified to simulate the brush-management activities. Streamflow-gaging station (U.S. Geological Survey streamflow-gaging station 08167353) is on an unnamed stream. Base map from U.S. Geological Survey digital data, 1:24,000 Universal Transverse Mercator projection, Zone 15 North American Datum of 1983.

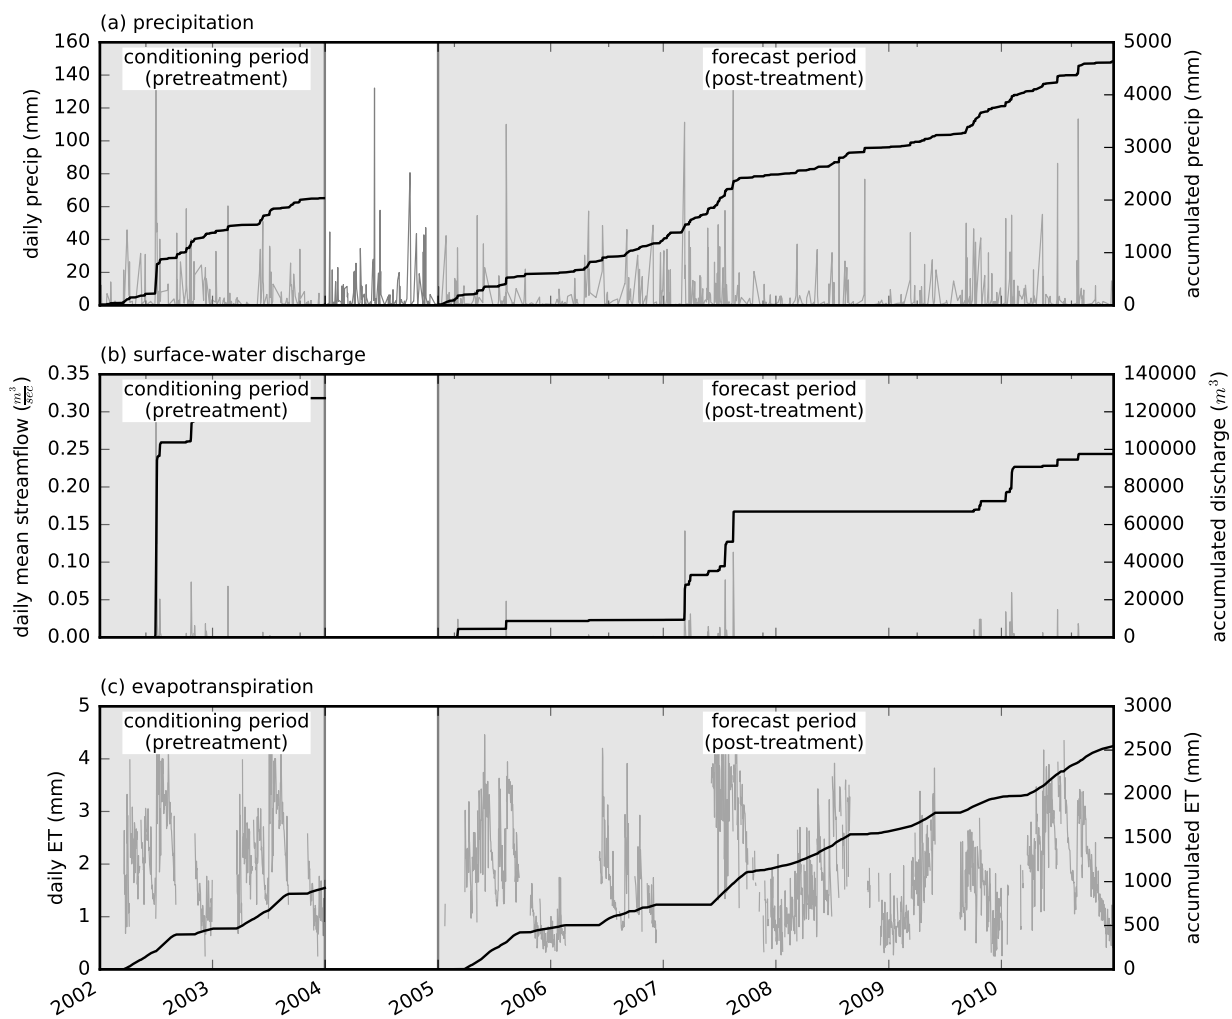

**Figure 2.** Summary of (a) precipitation, (b) streamflow, and (c) evapotranspiration used in the modeling analysis. Accumulated values for the conditioning and forecast period are shown in heavy black lines. Precipitation, streamflow and evapotranspiration estimates are from Banta and Slattery (2011).



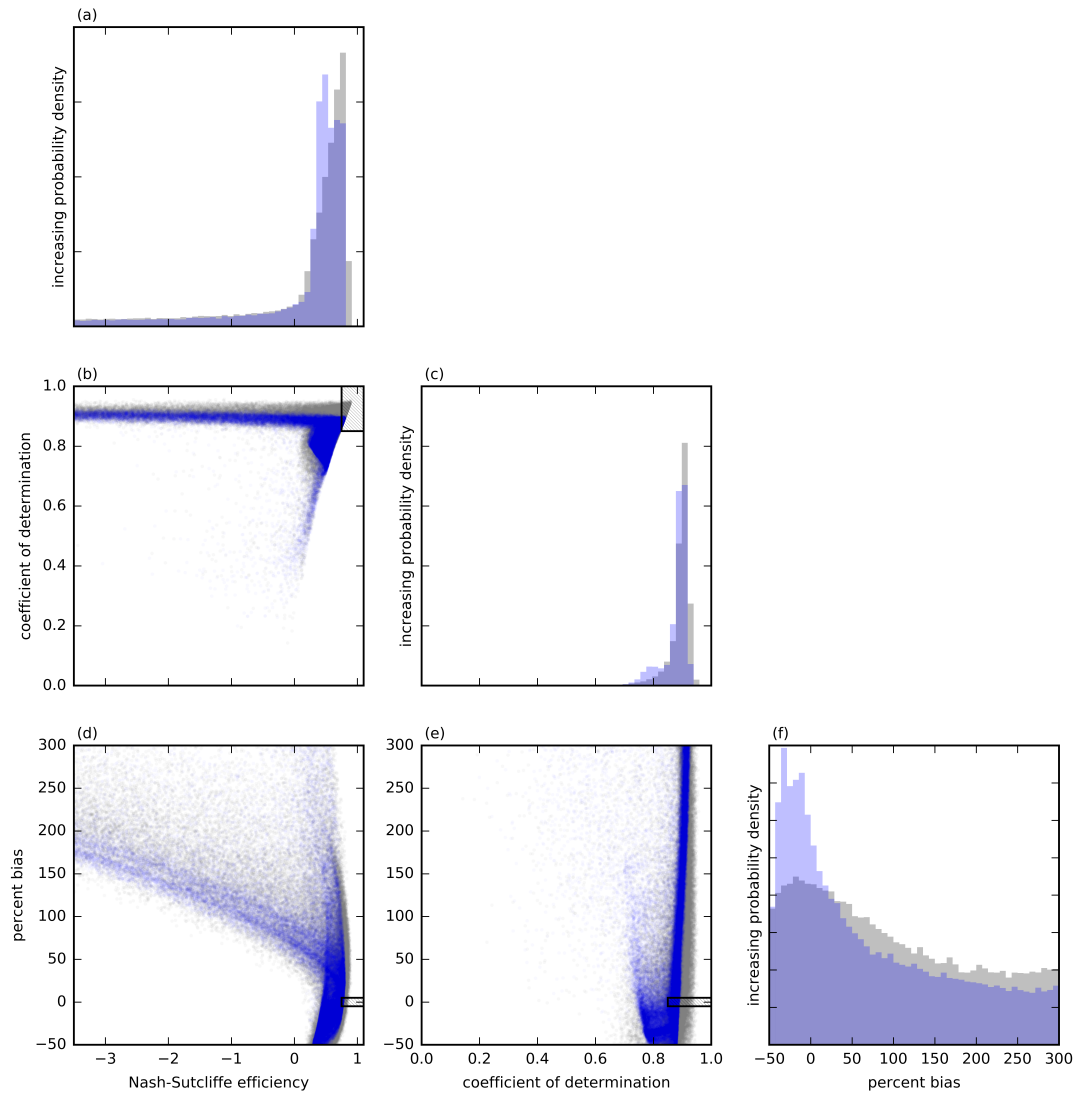

**Figure 3.** Values of conditioning measures for the full (gray) and reduced (blue) parameterizations. The diagonal panes ([a], [c], and [f]) show distribution of each conditioning measure; the off-diagonal panes ([b], [d] and [e]) show the relation between respective conditioning measures. The hatched boxes mark the 3-dimensional behavioral region; realizations within the hatched boxes comprise the behavioral ensembles of each parameterization.

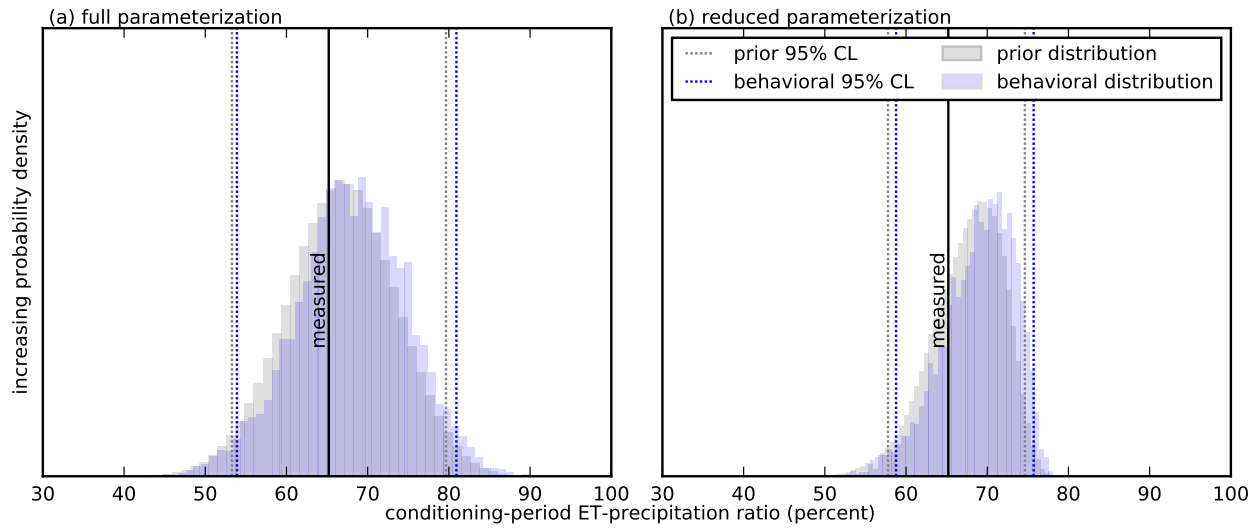

**Figure 4.** Quantity of interest QOI-1: Simulated conditioning period (pre-treatment) ET as a percentage of precipitation. The prior and behavioral 95% confidence intervals—defined by the confidence limits (CL)—of both model parameterizations bracket the measured value. However, the conditioning process has little effect on uncertainty as the behavioral distribution is similar to the prior distribution.

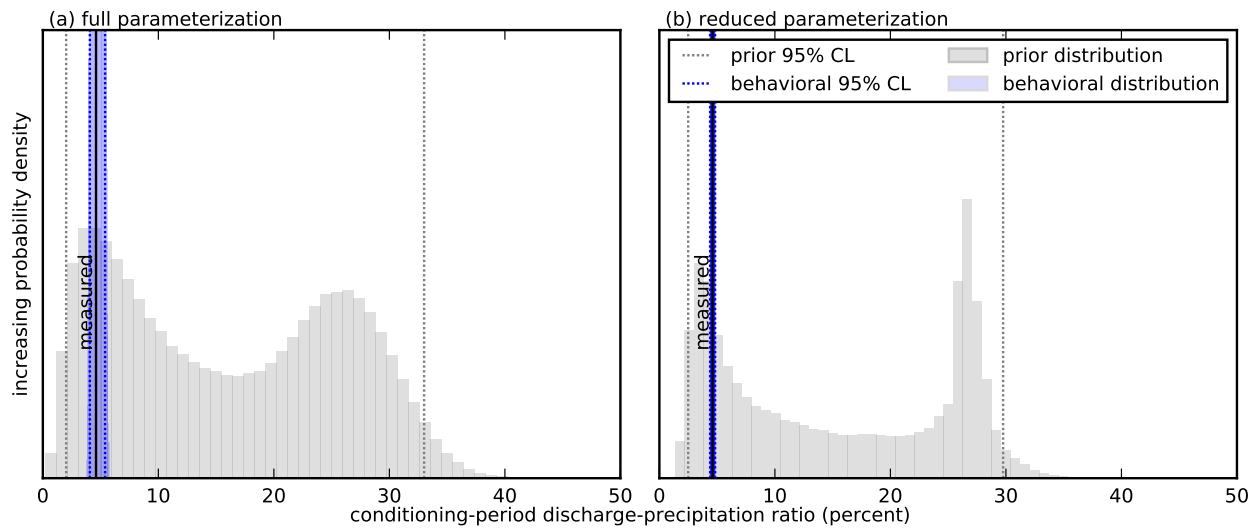

**Figure 5.** Quantity of interest QOI-2: Simulated conditioning period (pre-treatment) streamflow as a percentage of precipitation. The effects of the conditioning process can be seen as large reduction in the range of the behavioral distribution compared to the prior distribution. The prior and behavioral distributions for model parameterizations bracket the measured value.

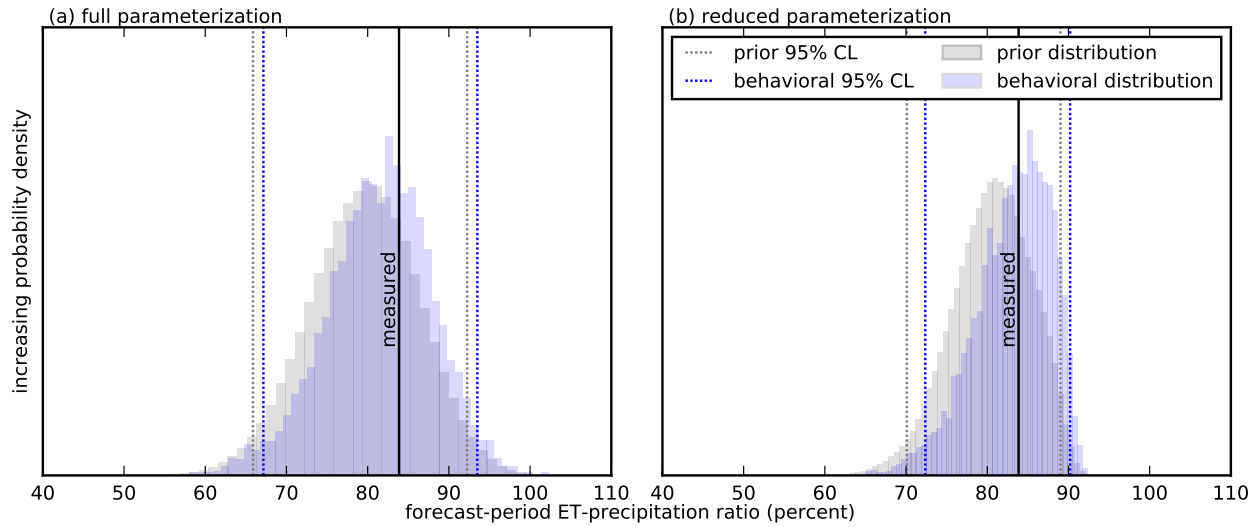

**Figure 6.** Quantity of interest QOI-3: Simulated forecast period (post-treatment) ET as a percentage of precipitation. All 95% confidence intervals bracket the measured value. However, the conditioning process has done little to decrease uncertainty as the behavioral distributions are similar to the prior distributions for both model parameterizations.

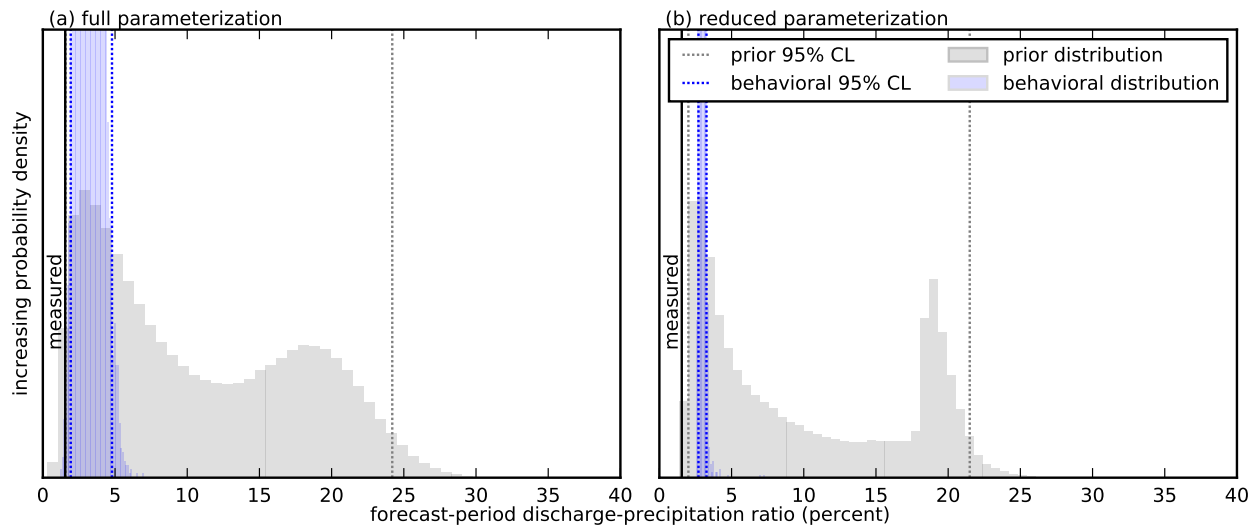

**Figure 7.** Quantity of interest QOI-4: Simulated forecast period (post-treatment) streamflow as a percentage of precipitation. Both the parameterizations appear to have been “overfit” with respect to this QOI as both behavioral distributions do not bracket the measured value at the 95% confidence level.

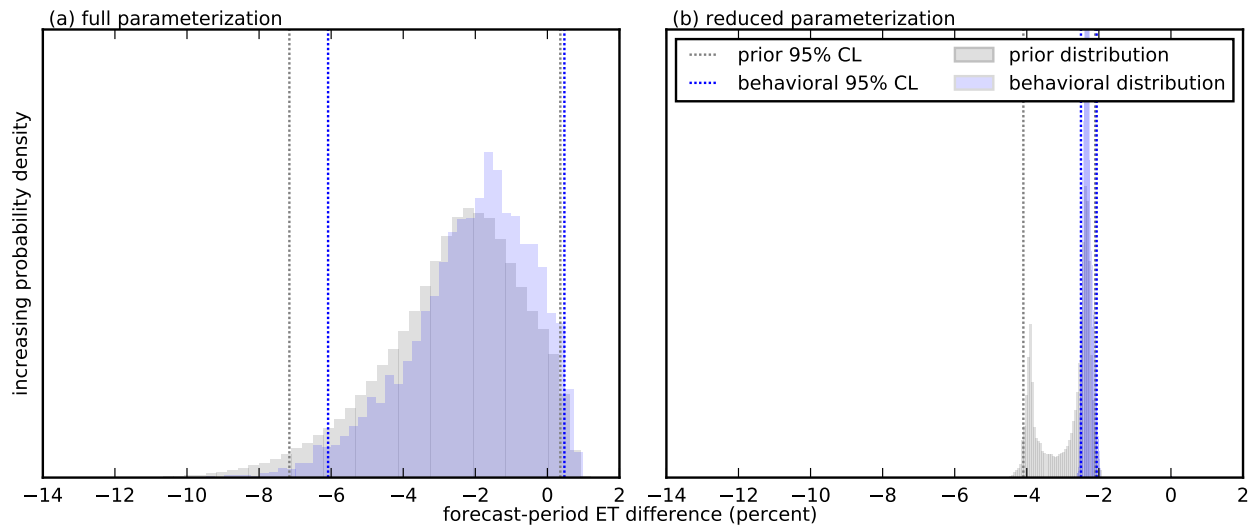

**Figure 8.** Quantity of interest QOI-5: Simulated difference in total forecast period (post-treatment) ET volume as a result of brush management. Negative values indicate a decrease in ET as a result of brush management. The reduce parameterization yields a much narrower confidence interval compared to the full parameterization.

**Table 1.** Summary of parameters used in the reduced parameterization. These 12 inputs were selected from Table 1 in Arnold et al. (2012b) and are adjusted at the sub-basin scale.

| Parameter          | Type       | Lower bound | Upper Bound | Description (with units if applicable)                                   |
|--------------------|------------|-------------|-------------|--------------------------------------------------------------------------|
| <i>alpha_bf_v</i>  | value      | 0.10        | 0.50        | subbasin baseflow alpha factor ( $1/4$ )                                 |
| <i>cn2_r</i>       | multiplier | 0.50        | 1.50        | subbasin soil moisture condition II curve number                         |
| <i>epco_v</i>      | value      | 0.50        | 0.98        | subbasin plant uptake compensation factor                                |
| <i>esco_v</i>      | value      | 0.50        | 0.98        | subbasin soil evaporation compensation factor                            |
| <i>gw_delay_v</i>  | value      | 10.00       | 300.00      | subbasin groundwater delay time (days)                                   |
| <i>gw_revap_v</i>  | value      | 0.02        | 0.40        | subbasin groundwater 'revap' coefficient                                 |
| <i>gwqmn_v</i>     | value      | 500         | 4000        | subbasin groundwater threshold return flow depth (mm)                    |
| <i>ov_n_r</i>      | multiplier | 0.50        | 1.50        | subbasin overland flow Manning's 'n'                                     |
| <i>rchr_dp_v</i>   | value      | 0.25        | 0.75        | subbasin deep aquifer percolation factor                                 |
| <i>revapmn_v</i>   | value      | 100         | 1000        | subbasin groundwater threshold 'revap' depth (mm)                        |
| <i>sol_awc_1_r</i> | multiplier | 1.00        | 5.00        | subbasin soil available water capacity ( $\frac{\text{mm}}{\text{mm}}$ ) |
| <i>surlag_v</i>    | value      | 2.00        | 12.00       | subbasin surface runoff lag coefficient                                  |

*Author contributions.* S. Rendon and V. Stengel gathered datasets and applied the ArcSWAT tool to prepared the SWAT model input files with help from J. Banta. J. White subjected the ArcSWAT model inputs files to the global sensitivity analysis and combined Monte Carlo GLUE analysis. J. White prepared the manuscript with contributions from all coauthors.

*Competing interests.* The authors declare that they have no conflict of interest.

*Disclaimer.* Any use of trade, firm, or product names is for descriptive purposes only and does not imply endorsement by the U.S. Government

*Acknowledgements.* The authors would like to recognize Kyle Douglas-Mankin, as well as additional reviewers, whose insightful comments  
5 improved the manuscript.

## References

- Abbaspour, K., Johnson, C., and Van Genuchten, M. T.: Estimating uncertain flow and transport parameters using a sequential uncertainty fitting procedure, *Vadose Zone Journal*, 3, 1340–1352, 2004.
- Abbaspour, K. C.: SWAT-CUP SWAT calibration and uncertainty programs, Texas A & M University, 2015.
- 5 Afinowicz, J. D., Munster, C. L., and Wilcox, B. P.: Modeling effects of brush management on the rangeland water budget: Edwards PLATEAU, Texas, *Journal of the American Water Resources Association*, 41, 181, 2005.
- Ahn, K.-H. and Merwade, V.: The effect of land cover change on duration and severity of high and low flows, *Hydrological Processes*, 31, 133–149, doi:10.1002/hyp.10981, <http://dx.doi.org/10.1002/hyp.10981>, hYP-15-0997.R4, 2017.
- Archer, S., Davies, K. W., Fulbright, T. E., McDaniel, K. C., Wilcox, B. P., Predick, K., and Briske, D.: Brush management as a rangeland  
10 conservation strategy: A critical evaluation, *Conservation benefits of rangeland practices*, Washington, DC, USA: US Department of Agriculture Natural Resources Conservation Service, pp. 105–170, 2011.
- Arnold, J., Kiniry, J., Srinivasan, R., Williams, J., Haney, E., and Neitsch, S.: Soil Water Assessment Tool Input/Output Documentation, College Station, TX, <http://swat.tamu.edu/media/69296/SWAT-IO-Documentation-2012.pdf>, 2012a.
- Arnold, J. G., Srinivasan, R., Muttiah, R. S., and Williams, J. R.: Large area hydrologic modeling and assessment part I: Model development,  
15 *Journal of the American Water Resources Association*, 34, 73–89, 1998.
- Arnold, J. G., Moriasi, D. N., Gassman, P. W., Abbaspour, K. C., White, M. J., Srinivasan, R., Santhi, C., Harmel, R., Van Griensven, A., Van Liew, M. W., et al.: SWAT: Model use, calibration, and validation, *Transactions of the ASABE*, 55, 1491–1508, 2012b.
- Banta, J. R. and Slattery, R. N.: Effects of brush management on the hydrologic budget and water quality in and adjacent to Honey Creek State Natural Area, Comal County, Texas, 2001–10, U.S Geological Survey Scientific Investigations Report 2011-5226, 35, 2011.
- 20 Ben Wu, X., Redeker, E. J., and Thurow, T. L.: Vegetation and water yield dynamics in an Edwards Plateau watershed, *Journal of Range Management*, 54, 98–105, 2001.
- Beven, K. and Binley, A.: The future of distributed models: Model calibration and uncertainty prediction, *Hydrological Processes*, 6, 279–298, 1992.
- Brown, D. S. and Raines, T. H.: Simulation of Flow and Effects of Best-Management Practices in the Upper Seco Creek Basin, South-Central  
25 Texas, 1991–98, U.S. Geological Survey Water-Resources Investigations Report 2002-4249, 22, 2002.
- Bumgarner, J. R. and Thompson, F. E.: Simulation of streamflow and the effects of brush management on water yields in the Upper Guadalupe River Watershed, South-Central Texas, 1995–2010, U.S. Geological Survey Scientific Investigation Report 2012-5051, 25 p., 2012.
- Chu, H.-J., Lin, Y.-P., Huang, C.-W., Hsu, C.-Y., and Chen, H.-Y.: Modelling the hydrologic effects of dynamic land-use change using a distributed hydrologic model and a spatial land-use allocation model, *Hydrological Processes*, 24, 2538–2554, 2010.
- 30 Cibin, R., Sudheer, K. P., and Chaubey, I.: Sensitivity and identifiability of stream flow generation parameters of the SWAT model, *Hydrological Processes*, 24, 1133–1148, 2010.
- DeFries, R. and Eshleman, K. N.: Land-use change and hydrologic processes: a major focus for the future, *Hydrological Processes*, 18, 2183–2186, 2004.
- Douglas-Mankin, K., Srinivasan, R., and Arnold, J.: Soil and Water Assessment Tool (SWAT) model: Current developments and applications,  
35 *Transactions of the ASABE*, 53, 1423–1431, 2010.

- Du, J., Rui, H., Zuo, T., Li, Q., Zheng, D., Chen, A., Xu, Y., and Xu, C.-Y.: Hydrological simulation by SWAT model with fixed and varied parameterization approaches under land use change, *Water Resources Management*, 27, 2823–2838, <http://dx.doi.org/10.1007/s11269-013-0317-0>, 2013.
- Fohrer, N., Haverkamp, S., Eckhardt, K., and Frede, H.-G.: Hydrologic response to land use changes on the catchment scale, *Physics and Chemistry of the Earth, Part B: Hydrology, Oceans and Atmosphere*, 26, 577–582, 2001.
- Gassman, P. W., Sadeghi, A. M., and Srinivasan, R.: Applications of the SWAT model special section: overview and insights, *Journal of Environmental Quality*, 43, 1–8, 2014.
- Gitau, M. W. and Chaubey, I.: Regionalization of SWAT model parameters for use in ungauged watersheds, *Water*, 2, 849–871, 2010.
- Harwell, G. R., Stengel, V. G., and Bumgarner, J. R.: Simulation of streamflow and the effects of brush management on water yields in the Double Mountain Fork Brazos River watershed, western Texas 1994–2013, U.S. Geological Survey Scientific Investigation Report 2016-5032, 50, 2016.
- Homer, C., Dewitz, J., Fry, J., Coan, M., Hossain, N., Larson, C., Herold, N., McKerrow, A., VanDriel, J., and Wickham, J.: Completion of the 2001 National Land Cover Database for the conterminous United States, *Photogrammetric Engineering & Remote Sensing*, 73, 337–341, 2007.
- Jakeman, A. and Hornberger, G.: How much complexity is warranted in a rainfall-runoff model?, *Water resources research*, 29, 2637–2649, 1993.
- Jeong, J., Kannan, N., Arnold, J., Glick, R., Gosselink, L., and Srinivasan, R.: Development and integration of sub-hourly rainfall-runoff modeling capability within a watershed model, *Water Resources Management*, 24, 4505–4527, 2010.
- Kavetski, D., Kuczera, G., and Franks, S. W.: Bayesian analysis of input uncertainty in hydrological modeling: 2. Application, *Water Resources Research*, 42, 2006.
- Kuczera, G., Kavetski, D., Franks, S., and Thyer, M.: Towards a Bayesian total error analysis of conceptual rainfall-runoff models: Characterising model error using storm-dependent parameters, *Journal of Hydrology*, 331, 161–177, 2006.
- Lemberg, B., Mjelde, J. W., Conner, J. R., Griffin, R. C., Rosenthal, W. D., and Stuth, J. W.: An interdisciplinary approach to valuing water from brush control, *Journal of the American Water Resources Association*, 38, 409–422, 2002.
- Leta, O. T., Nossent, J., Velez, C., Shrestha, N. K., Griensven, A. V., and Bauwens, W.: Assessment of the different sources of uncertainty in a SWAT model of the River Slenne (Belgium), *Environmental Modelling and Software*, 68, 129–146, <http://www.sciencedirect.com/science/article/pii/S1364815215000596>, 2015.
- Malone, R. W., Yagow, G., Baffaut, C., Gitau, M. W., Qi, Z., Amatya, D. M., Parajuli, P. B., Bonta, J. V., and Green, T. R.: Parameterization guidelines and considerations for hydrologic models, *Transactions of the ASABE*, 58, 1681–1703, 2015.
- Maune, D., for Photogrammetry, A. S., and Sensing, R.: Digital Elevation Model Technologies and Applications: The DEM Users Manual, American Society for Photogrammetry and Remote Sensing, <https://books.google.com/books?id=IbwsAQAAMAAJ>, 2007.
- Mein, R. G. and Larson, C. L.: Modeling infiltration during a steady rain, *Water resources research*, 9, 384–394, 1973.
- Migliaccio, K. W. and Chaubey, I.: Spatial distributions and stochastic parameter influences on SWAT flow and sediment predictions, *Journal of hydrologic engineering*, 13, 258–269, 2008.
- Moriasi, D. N., Arnold, J. G., Van Liew, M. W., Bingner, R. L., Harmel, R. D., and Veith, T. L.: Model evaluation guidelines for systematic quantification of accuracy in watershed simulations, *Transactions of the ASABE*, 50, 885–900, 2007.
- Morris, M. D.: Factorial sampling plans for preliminary computational experiments, *Technometrics*, 33, 161–174, 1991.

- Nash, J. E. and Sutcliffe, J. V.: River flow forecasting through conceptual models part I: A discussion of principles, *Journal of hydrology*, 10, 282–290, 1970.
- Neitsch, S., Arnold, J., Kiniry, J., and Williams, J.: Soil Water Assessment Tool Theoretical Documentation, College Station, TX, <http://swat.tamu.edu/media/99192/swat2009-theory.pdf>, 2011.
- 5 Renard, B., Kavetski, D., Leblois, E., Thyer, M., Kuczera, G., and Franks, S. W.: Toward a reliable decomposition of predictive uncertainty in hydrological modeling: Characterizing rainfall errors using conditional simulation, *Water Resources Research*, 47, w11516, 2011.
- Romanowicz, A. A., Vanclouster, M., Rounsevell, M., and La Junesse, I.: Sensitivity of the SWAT model to the soil and land use data paramterisation: a case study in the Thyle catchment, Belgium, *Ecological Modelling*, 187, 27–39, 2005.
- Saha, S., Moorthi, S., Wu, X., Wang, J., Nadiga, S., Tripp, P., Behringer, D., Hou, Y.-T., Chuang, H.-y., Iredell, M., et al.: The NCEP climate  
10 forecast system version 2, *Journal of Climate*, 27, 2185–2208, 2014.
- Schilling, K. E., Gassman, P. W., Kling, C. L., Campbell, T., Jha, M. K., Wolter, C. F., and Arnold, J. G.: The potential for agricultural land use change to reduce flood risk in a large watershed, *Hydrological Processes*, 28, 3314–3325, <http://dx.doi.org/10.1002/hyp.9865>, 2014.
- Sexton, A., Shirmohammadi, A., Sadeghi, A., and Montas, H.: Impact of parameter uncertainty on critical SWAT output simulations, *Transactions of the ASABE*, 54, 461–471, 2011.
- 15 Staff, S. S.: Natural Resources Conservation Service, United States Department of Agriculture. Soil Survey Geographic (SSURGO) Database, <https://sdmdataaccess.sc.egov.usda.gov>, 2016.
- Tarantola, A.: *Inverse problem theory and methods for model parameter estimation*, SIAM, 2005.
- Tennesen, M.: When Juniper and Woody Plants Invade, Water May Retreat, *Science*, 322, 1630–1631, 2008.
- U.S. Department of Agriculture, N. R. C. S.: National Conservation Practice Standard Code 314, U.S. Department of Agriculture, p. 4, 2009.
- 20 Welter, D. E., White, J. T., Doherty, J. E., and Hunt, R. J.: PEST++ Version 3, a Parameter ESTimation and uncertainty analysis software suite optimized for large environmental models, U.S. Geological Survey Techniques and Methods Report, 7-C12, 54, 2015.
- White, J. T., Doherty, J. E., and Hughes, J. D.: Quantifying the predictive consequences of model error with linear subspace analysis, *Water Resources Research*, 50, 1152–1173, 2014.
- White, J. T., Fienen, M. N., and Doherty, J. E.: A python framework for environmental model uncertainty analysis, *Environmental Modelling and Software*, 85, 217–228, <http://www.sciencedirect.com/science/article/pii/S1364815216305461>, 2016.
- 25 White, J. T., Stengel, V. G., Rendon, S., and Banta, J. R.: The importance of parameterization when simulating the hydrologic response of vegetative land-cover change, U.S. Geological Survey Data Release, doi:<https://doi.org/10.5066/F7WH2NGR>, 2017.
- Winchell, M., Srinivasan, R., Di Luzio, M., and Arnold, J.: ArcSWAT interface for SWAT2005 user’s guide, Texas Agricultural Experiment Station and United States Department of Agriculture, Temple, TX, 2007.
- 30 Zhang, J. L., Li, Y. P., Huang, G. H., Wang, C. X., and Cheng, G. H.: Evaluation of uncertainties in input data and parameters of hydrological model using a Bayesian framework: A case study of a snowmelt-precipitation-driven watershed, *Journal of Hydrometeorology*, 17, 2333–2350, 2016.
- Zhenyao, S., Lei, C., and Tao, C.: The influence of parameter distribution uncertainty on hydrological and sediment modeling: a case study of SWAT model applied to the Daning watershed of the Three Gorges Reservoir Region, China, *Stochastic environmental research and risk assessment*, 27, 235–251, 2013.
- 35



Supplementary Material: Table S1. Summary of SWAT model input variables included in the full parameters. Parameter descriptions refer to SWAT input variables as described in the SWAT documentation (Arnold and others, 2012a).

| Parameter           | Type       | Lower Bound | Upper Bound | Description (with units if applicable)                |
|---------------------|------------|-------------|-------------|-------------------------------------------------------|
| <i>alaimin_frsl</i> | value      | 0.375       | 1.125       | subbasin deciduous forest dormant min leaf area index |
| <i>alaimin_frse</i> | value      | 0.375       | 1.125       | subbasin evergreen forest dormant min leaf area index |
| <i>alaimin_rnge</i> | value      | 0.000       | 1.000       | subbasin rangeland dormant min leaf area index        |
| <i>alpha_bf_01</i>  | multiplier | 0.850       | 1.150       | HRU 01 baseflow alpha factor ( $\frac{1}{4}$ )        |
| <i>alpha_bf_02</i>  | multiplier | 0.850       | 1.150       | HRU 02 baseflow alpha factor ( $\frac{1}{4}$ )        |
| <i>alpha_bf_03</i>  | multiplier | 0.850       | 1.150       | HRU 03 baseflow alpha factor ( $\frac{1}{4}$ )        |
| <i>alpha_bf_04</i>  | multiplier | 0.850       | 1.150       | HRU 04 baseflow alpha factor ( $\frac{1}{4}$ )        |
| <i>alpha_bf_05</i>  | multiplier | 0.850       | 1.150       | HRU 05 baseflow alpha factor ( $\frac{1}{4}$ )        |
| <i>alpha_bf_06</i>  | multiplier | 0.850       | 1.150       | HRU 06 baseflow alpha factor ( $\frac{1}{4}$ )        |
| <i>alpha_bf_07</i>  | multiplier | 0.850       | 1.150       | HRU 07 baseflow alpha factor ( $\frac{1}{4}$ )        |
| <i>alpha_bf_08</i>  | multiplier | 0.850       | 1.150       | HRU 08 baseflow alpha factor ( $\frac{1}{4}$ )        |
| <i>alpha_bf_09</i>  | multiplier | 0.850       | 1.150       | HRU 09 baseflow alpha factor ( $\frac{1}{4}$ )        |
| <i>alpha_bf_10</i>  | multiplier | 0.850       | 1.150       | HRU 10 baseflow alpha factor ( $\frac{1}{4}$ )        |
| <i>alpha_bf_11</i>  | multiplier | 0.850       | 1.150       | HRU 11 baseflow alpha factor ( $\frac{1}{4}$ )        |
| <i>alpha_bf_12</i>  | multiplier | 0.850       | 1.150       | HRU 12 baseflow alpha factor ( $\frac{1}{4}$ )        |
| <i>alpha_bf_13</i>  | multiplier | 0.850       | 1.150       | HRU 13 baseflow alpha factor ( $\frac{1}{4}$ )        |
| <i>alpha_bf_14</i>  | multiplier | 0.850       | 1.150       | HRU 14 baseflow alpha factor ( $\frac{1}{4}$ )        |
| <i>alpha_bf_15</i>  | multiplier | 0.850       | 1.150       | HRU 15 baseflow alpha factor ( $\frac{1}{4}$ )        |
| <i>alpha_bf_16</i>  | multiplier | 0.850       | 1.150       | HRU 16 baseflow alpha factor ( $\frac{1}{4}$ )        |
| <i>alpha_bf_17</i>  | multiplier | 0.850       | 1.150       | HRU 17 baseflow alpha factor ( $\frac{1}{4}$ )        |
| <i>alpha_bf_18</i>  | multiplier | 0.850       | 1.150       | HRU 18 baseflow alpha factor ( $\frac{1}{4}$ )        |
| <i>alpha_bf_19</i>  | multiplier | 0.850       | 1.150       | HRU 19 baseflow alpha factor ( $\frac{1}{4}$ )        |
| <i>alpha_bf_20</i>  | multiplier | 0.850       | 1.150       | HRU 20 baseflow alpha factor ( $\frac{1}{4}$ )        |
| <i>alpha_bf_21</i>  | multiplier | 0.850       | 1.150       | HRU 21 baseflow alpha factor ( $\frac{1}{4}$ )        |
| <i>alpha_bf_22</i>  | multiplier | 0.850       | 1.150       | HRU 22 baseflow alpha factor ( $\frac{1}{4}$ )        |
| <i>alpha_bf_23</i>  | multiplier | 0.850       | 1.150       | HRU 23 baseflow alpha factor ( $\frac{1}{4}$ )        |
| <i>alpha_bf_24</i>  | multiplier | 0.850       | 1.150       | HRU 24 baseflow alpha factor ( $\frac{1}{4}$ )        |
| <i>alpha_bf_25</i>  | multiplier | 0.850       | 1.150       | HRU 25 baseflow alpha factor ( $\frac{1}{4}$ )        |
| <i>alpha_bf_26</i>  | multiplier | 0.850       | 1.150       | HRU 26 baseflow alpha factor ( $\frac{1}{4}$ )        |
| <i>alpha_bf_27</i>  | multiplier | 0.850       | 1.150       | HRU 27 baseflow alpha factor ( $\frac{1}{4}$ )        |
| <i>alpha_bf_28</i>  | multiplier | 0.850       | 1.150       | HRU 28 baseflow alpha factor ( $\frac{1}{4}$ )        |
| <i>alpha_bf_29</i>  | multiplier | 0.850       | 1.150       | HRU 29 baseflow alpha factor ( $\frac{1}{4}$ )        |
| <i>alpha_bf_30</i>  | multiplier | 0.850       | 1.150       | HRU 30 baseflow alpha factor ( $\frac{1}{4}$ )        |
| <i>alpha_bf_31</i>  | multiplier | 0.850       | 1.150       | HRU 31 baseflow alpha factor ( $\frac{1}{4}$ )        |
| <i>alpha_bf_32</i>  | multiplier | 0.850       | 1.150       | HRU 32 baseflow alpha factor ( $\frac{1}{4}$ )        |
| <i>alpha_bf_33</i>  | multiplier | 0.850       | 1.150       | HRU 33 baseflow alpha factor ( $\frac{1}{4}$ )        |
| <i>alpha_bf_34</i>  | multiplier | 0.850       | 1.150       | HRU 34 baseflow alpha factor ( $\frac{1}{4}$ )        |
| <i>alpha_bf_35</i>  | multiplier | 0.850       | 1.150       | HRU 35 baseflow alpha factor ( $\frac{1}{4}$ )        |
| <i>alpha_bf_36</i>  | multiplier | 0.850       | 1.150       | HRU 36 baseflow alpha factor ( $\frac{1}{4}$ )        |
| <i>alpha_bf_37</i>  | multiplier | 0.850       | 1.150       | HRU 37 baseflow alpha factor ( $\frac{1}{4}$ )        |
| <i>alpha_bf_38</i>  | multiplier | 0.850       | 1.150       | HRU 38 baseflow alpha factor ( $\frac{1}{4}$ )        |

Continued on next page

| Parameter          | Type       | Lower Bound | Upper Bound | Description (with units if applicable)                  |
|--------------------|------------|-------------|-------------|---------------------------------------------------------|
| <i>alpha_bf_39</i> | multiplier | 0.850       | 1.150       | HRU 39 baseflow alpha factor ( $\frac{1}{4}$ )          |
| <i>alpha_bf_40</i> | multiplier | 0.850       | 1.150       | HRU 40 baseflow alpha factor ( $\frac{1}{4}$ )          |
| <i>alpha_bf_41</i> | multiplier | 0.850       | 1.150       | HRU 41 baseflow alpha factor ( $\frac{1}{4}$ )          |
| <i>alpha_bf_42</i> | multiplier | 0.850       | 1.150       | HRU 42 baseflow alpha factor ( $\frac{1}{4}$ )          |
| <i>alpha_bf_43</i> | multiplier | 0.850       | 1.150       | HRU 43 baseflow alpha factor ( $\frac{1}{4}$ )          |
| <i>alpha_bf_44</i> | multiplier | 0.850       | 1.150       | HRU 44 baseflow alpha factor ( $\frac{1}{4}$ )          |
| <i>alpha_bf_45</i> | multiplier | 0.850       | 1.150       | HRU 45 baseflow alpha factor ( $\frac{1}{4}$ )          |
| <i>alpha_bf_46</i> | multiplier | 0.850       | 1.150       | HRU 46 baseflow alpha factor ( $\frac{1}{4}$ )          |
| <i>alpha_bf_47</i> | multiplier | 0.850       | 1.150       | HRU 47 baseflow alpha factor ( $\frac{1}{4}$ )          |
| <i>alpha_bf_v</i>  | value      | 0.100       | 0.500       | subbasin baseflow alpha factor ( $\frac{1}{4}$ )        |
| <i>blai_frsd</i>   | value      | 2.500       | 7.500       | subbasin deciduous forest max potential leaf area index |
| <i>blai_frse</i>   | value      | 2.500       | 7.500       | subbasin evergreen forest max potential leaf area index |
| <i>blai_rnge</i>   | value      | 1.250       | 3.750       | subbasin rangeland max potential leaf area index        |
| <i>canmx_01</i>    | multiplier | 0.850       | 1.150       | HRU 01 max canopy storage for evergreen forest (mm)     |
| <i>canmx_02</i>    | multiplier | 0.850       | 1.150       | HRU 02 max canopy storage for evergreen forest (mm)     |
| <i>canmx_03</i>    | multiplier | 0.850       | 1.150       | HRU 03 max canopy storage for evergreen forest (mm)     |
| <i>canmx_04</i>    | multiplier | 0.850       | 1.150       | HRU 04 max canopy storage for evergreen forest (mm)     |
| <i>canmx_05</i>    | multiplier | 0.850       | 1.150       | HRU 05 max canopy storage for evergreen forest (mm)     |
| <i>canmx_06</i>    | multiplier | 0.850       | 1.150       | HRU 06 max canopy storage for evergreen forest (mm)     |
| <i>canmx_07</i>    | multiplier | 0.850       | 1.150       | HRU 07 max canopy storage for evergreen forest (mm)     |
| <i>canmx_08</i>    | multiplier | 0.850       | 1.150       | HRU 08 max canopy storage for evergreen forest (mm)     |
| <i>canmx_09</i>    | multiplier | 0.850       | 1.150       | HRU 09 max canopy storage for evergreen forest (mm)     |
| <i>canmx_10</i>    | multiplier | 0.850       | 1.150       | HRU 10 max canopy storage for evergreen forest (mm)     |
| <i>canmx_11</i>    | multiplier | 0.850       | 1.150       | HRU 11 max canopy storage for evergreen forest (mm)     |
| <i>canmx_12</i>    | multiplier | 0.850       | 1.150       | HRU 12 max canopy storage for evergreen forest (mm)     |
| <i>canmx_13</i>    | multiplier | 0.850       | 1.150       | HRU 13 max canopy storage for evergreen forest (mm)     |
| <i>canmx_14</i>    | multiplier | 0.850       | 1.150       | HRU 14 max canopy storage for evergreen forest (mm)     |
| <i>canmx_15</i>    | multiplier | 0.850       | 1.150       | HRU 15 max canopy storage for evergreen forest (mm)     |
| <i>canmx_16</i>    | multiplier | 0.850       | 1.150       | HRU 16 max canopy storage for evergreen forest (mm)     |
| <i>canmx_17</i>    | multiplier | 0.850       | 1.150       | HRU 17 max canopy storage for evergreen forest (mm)     |
| <i>canmx_18</i>    | multiplier | 0.850       | 1.150       | HRU 18 max canopy storage for evergreen forest (mm)     |
| <i>canmx_19</i>    | multiplier | 0.850       | 1.150       | HRU 19 max canopy storage for evergreen forest (mm)     |
| <i>canmx_20</i>    | multiplier | 0.850       | 1.150       | HRU 20 max canopy storage for evergreen forest (mm)     |
| <i>canmx_21</i>    | multiplier | 0.850       | 1.150       | HRU 21 max canopy storage for evergreen forest (mm)     |
| <i>canmx_22</i>    | multiplier | 0.850       | 1.150       | HRU 22 max canopy storage for evergreen forest (mm)     |
| <i>canmx_23</i>    | multiplier | 0.850       | 1.150       | HRU 23 max canopy storage for evergreen forest (mm)     |
| <i>canmx_24</i>    | multiplier | 0.850       | 1.150       | HRU 24 max canopy storage for evergreen forest (mm)     |
| <i>canmx_25</i>    | multiplier | 0.850       | 1.150       | HRU 25 max canopy storage for evergreen forest (mm)     |
| <i>canmx_26</i>    | multiplier | 0.850       | 1.150       | HRU 26 max canopy storage for evergreen forest (mm)     |
| <i>canmx_27</i>    | multiplier | 0.850       | 1.150       | HRU 27 max canopy storage for evergreen forest (mm)     |
| <i>canmx_28</i>    | multiplier | 0.850       | 1.150       | HRU 28 max canopy storage for evergreen forest (mm)     |

Continued on next page

| Parameter          | Type       | Lower Bound | Upper Bound | Description (with units if applicable)                                   |
|--------------------|------------|-------------|-------------|--------------------------------------------------------------------------|
| <i>canmx_29</i>    | multiplier | 0.850       | 1.150       | HRU 29 max canopy storage for evergreen forest (mm)                      |
| <i>canmx_30</i>    | multiplier | 0.850       | 1.150       | HRU 30 max canopy storage for evergreen forest (mm)                      |
| <i>canmx_31</i>    | multiplier | 0.850       | 1.150       | HRU 31 max canopy storage for evergreen forest (mm)                      |
| <i>canmx_32</i>    | multiplier | 0.850       | 1.150       | HRU 32 max canopy storage for evergreen forest (mm)                      |
| <i>canmx_33</i>    | multiplier | 0.850       | 1.150       | HRU 33 max canopy storage for evergreen forest (mm)                      |
| <i>canmx_34</i>    | multiplier | 0.850       | 1.150       | HRU 34 max canopy storage for evergreen forest (mm)                      |
| <i>canmx_35</i>    | multiplier | 0.850       | 1.150       | HRU 35 max canopy storage for evergreen forest (mm)                      |
| <i>canmx_36</i>    | multiplier | 0.850       | 1.150       | HRU 36 max canopy storage for evergreen forest (mm)                      |
| <i>canmx_37</i>    | multiplier | 0.850       | 1.150       | HRU 37 max canopy storage for evergreen forest (mm)                      |
| <i>canmx_38</i>    | multiplier | 0.850       | 1.150       | HRU 38 max canopy storage for evergreen forest (mm)                      |
| <i>canmx_39</i>    | multiplier | 0.850       | 1.150       | HRU 39 max canopy storage for evergreen forest (mm)                      |
| <i>canmx_40</i>    | multiplier | 0.850       | 1.150       | HRU 40 max canopy storage for evergreen forest (mm)                      |
| <i>canmx_41</i>    | multiplier | 0.850       | 1.150       | HRU 41 max canopy storage for evergreen forest (mm)                      |
| <i>canmx_42</i>    | multiplier | 0.850       | 1.150       | HRU 42 max canopy storage for evergreen forest (mm)                      |
| <i>canmx_43</i>    | multiplier | 0.850       | 1.150       | HRU 43 max canopy storage for evergreen forest (mm)                      |
| <i>canmx_44</i>    | multiplier | 0.850       | 1.150       | HRU 44 max canopy storage for evergreen forest (mm)                      |
| <i>canmx_45</i>    | multiplier | 0.850       | 1.150       | HRU 45 max canopy storage for evergreen forest (mm)                      |
| <i>canmx_46</i>    | multiplier | 0.850       | 1.150       | HRU 46 max canopy storage for evergreen forest (mm)                      |
| <i>canmx_47</i>    | multiplier | 0.850       | 1.150       | HRU 47 max canopy storage for evergreen forest (mm)                      |
| <i>canmx_v</i>     | value      | 1.000       | 25.000      | subbasin max canopy storage for evergreen forest (mm)                    |
| <i>canmxfac_07</i> | multiplier | 0.250       | 1.000       | HRU 07 decidous forest fraction of max canopy storage                    |
| <i>canmxfac_15</i> | multiplier | 0.000       | 0.500       | HRU 15 rangeland fraction of max canopy storage                          |
| <i>ch_k2_r</i>     | multiplier | 0.750       | 2.000       | subbasin main channel alluvium hydraulic conductivity ( $\text{mm/hr}$ ) |
| <i>ch_n2_r</i>     | multiplier | 1.000       | 5.000       | subbasin main channel Manning's 'n'                                      |
| <i>cn2_01</i>      | multiplier | 0.850       | 1.150       | HRU 01 soil moisture condition II curve number                           |
| <i>cn2_02</i>      | multiplier | 0.850       | 1.150       | HRU 02 soil moisture condition II curve number                           |
| <i>cn2_03</i>      | multiplier | 0.850       | 1.150       | HRU 03 soil moisture condition II curve number                           |
| <i>cn2_04</i>      | multiplier | 0.850       | 1.150       | HRU 04 soil moisture condition II curve number                           |
| <i>cn2_05</i>      | multiplier | 0.850       | 1.150       | HRU 05 soil moisture condition II curve number                           |
| <i>cn2_06</i>      | multiplier | 0.850       | 1.150       | HRU 06 soil moisture condition II curve number                           |
| <i>cn2_07</i>      | multiplier | 0.850       | 1.150       | HRU 07 soil moisture condition II curve number                           |
| <i>cn2_08</i>      | multiplier | 0.850       | 1.150       | HRU 08 soil moisture condition II curve number                           |
| <i>cn2_09</i>      | multiplier | 0.850       | 1.150       | HRU 09 soil moisture condition II curve number                           |
| <i>cn2_10</i>      | multiplier | 0.850       | 1.150       | HRU 10 soil moisture condition II curve number                           |
| <i>cn2_11</i>      | multiplier | 0.850       | 1.150       | HRU 11 soil moisture condition II curve number                           |
| <i>cn2_12</i>      | multiplier | 0.850       | 1.150       | HRU 12 soil moisture condition II curve number                           |
| <i>cn2_13</i>      | multiplier | 0.850       | 1.150       | HRU 13 soil moisture condition II curve number                           |
| <i>cn2_14</i>      | multiplier | 0.850       | 1.150       | HRU 14 soil moisture condition II curve number                           |
| <i>cn2_15</i>      | multiplier | 0.850       | 1.150       | HRU 15 soil moisture condition II curve number                           |
| <i>cn2_16</i>      | multiplier | 0.850       | 1.150       | HRU 16 soil moisture condition II curve number                           |
| <i>cn2_17</i>      | multiplier | 0.850       | 1.150       | HRU 17 soil moisture condition II curve number                           |

Continued on next page

| Parameter        | Type       | Lower Bound | Upper Bound | Description (with units if applicable)                             |
|------------------|------------|-------------|-------------|--------------------------------------------------------------------|
| <i>cn2_18</i>    | multiplier | 0.850       | 1.150       | HRU 18 soil moisture condition II curve number                     |
| <i>cn2_19</i>    | multiplier | 0.850       | 1.150       | HRU 19 soil moisture condition II curve number                     |
| <i>cn2_20</i>    | multiplier | 0.850       | 1.150       | HRU 20 soil moisture condition II curve number                     |
| <i>cn2_21</i>    | multiplier | 0.850       | 1.150       | HRU 21 soil moisture condition II curve number                     |
| <i>cn2_22</i>    | multiplier | 0.850       | 1.150       | HRU 22 soil moisture condition II curve number                     |
| <i>cn2_23</i>    | multiplier | 0.850       | 1.150       | HRU 23 soil moisture condition II curve number                     |
| <i>cn2_24</i>    | multiplier | 0.850       | 1.150       | HRU 24 soil moisture condition II curve number                     |
| <i>cn2_25</i>    | multiplier | 0.850       | 1.150       | HRU 25 soil moisture condition II curve number                     |
| <i>cn2_26</i>    | multiplier | 0.850       | 1.150       | HRU 26 soil moisture condition II curve number                     |
| <i>cn2_27</i>    | multiplier | 0.850       | 1.150       | HRU 27 soil moisture condition II curve number                     |
| <i>cn2_28</i>    | multiplier | 0.850       | 1.150       | HRU 28 soil moisture condition II curve number                     |
| <i>cn2_29</i>    | multiplier | 0.850       | 1.150       | HRU 29 soil moisture condition II curve number                     |
| <i>cn2_30</i>    | multiplier | 0.850       | 1.150       | HRU 30 soil moisture condition II curve number                     |
| <i>cn2_31</i>    | multiplier | 0.850       | 1.150       | HRU 31 soil moisture condition II curve number                     |
| <i>cn2_32</i>    | multiplier | 0.850       | 1.150       | HRU 32 soil moisture condition II curve number                     |
| <i>cn2_33</i>    | multiplier | 0.850       | 1.150       | HRU 33 soil moisture condition II curve number                     |
| <i>cn2_34</i>    | multiplier | 0.850       | 1.150       | HRU 34 soil moisture condition II curve number                     |
| <i>cn2_35</i>    | multiplier | 0.850       | 1.150       | HRU 35 soil moisture condition II curve number                     |
| <i>cn2_36</i>    | multiplier | 0.850       | 1.150       | HRU 36 soil moisture condition II curve number                     |
| <i>cn2_37</i>    | multiplier | 0.850       | 1.150       | HRU 37 soil moisture condition II curve number                     |
| <i>cn2_38</i>    | multiplier | 0.850       | 1.150       | HRU 38 soil moisture condition II curve number                     |
| <i>cn2_39</i>    | multiplier | 0.850       | 1.150       | HRU 39 soil moisture condition II curve number                     |
| <i>cn2_40</i>    | multiplier | 0.850       | 1.150       | HRU 40 soil moisture condition II curve number                     |
| <i>cn2_41</i>    | multiplier | 0.850       | 1.150       | HRU 41 soil moisture condition II curve number                     |
| <i>cn2_42</i>    | multiplier | 0.850       | 1.150       | HRU 42 soil moisture condition II curve number                     |
| <i>cn2_43</i>    | multiplier | 0.850       | 1.150       | HRU 43 soil moisture condition II curve number                     |
| <i>cn2_44</i>    | multiplier | 0.850       | 1.150       | HRU 44 soil moisture condition II curve number                     |
| <i>cn2_45</i>    | multiplier | 0.850       | 1.150       | HRU 45 soil moisture condition II curve number                     |
| <i>cn2_46</i>    | multiplier | 0.850       | 1.150       | HRU 46 soil moisture condition II curve number                     |
| <i>cn2_47</i>    | multiplier | 0.850       | 1.150       | HRU 47 soil moisture condition II curve number                     |
| <i>cn2_r</i>     | multiplier | 0.500       | 1.500       | subbasin soil moisture condition II curve number                   |
| <i>cncoef_r</i>  | multiplier | 0.500       | 1.500       | subbasin plant ET curve number coefficient                         |
| <i>dlai_frsd</i> | value      | 0.495       | 1.485       | subbasin deciduous forest frac growing season to start LAI decline |
| <i>dlai_frse</i> | value      | 0.495       | 1.485       | subbasin evergreen forest frac growing season to start LAI decline |
| <i>dlai_rnge</i> | value      | 0.175       | 0.525       | subbasin rangeland frac growing season to start LAI decline        |
| <i>dorm_hr_v</i> | value      | 0.000       | 4.000       | subbasin dormancy time threshold (hrs)                             |
| <i>epco_01</i>   | multiplier | 0.850       | 1.150       | HRU 01 plant uptake compensation factor                            |
| <i>epco_02</i>   | multiplier | 0.850       | 1.150       | HRU 02 plant uptake compensation factor                            |
| <i>epco_03</i>   | multiplier | 0.850       | 1.150       | HRU 03 plant uptake compensation factor                            |
| <i>epco_04</i>   | multiplier | 0.850       | 1.150       | HRU 04 plant uptake compensation factor                            |
| <i>epco_05</i>   | multiplier | 0.850       | 1.150       | HRU 05 plant uptake compensation factor                            |

Continued on next page

| Parameter      | Type       | Lower Bound | Upper Bound | Description (with units if applicable)  |
|----------------|------------|-------------|-------------|-----------------------------------------|
| <i>epco_06</i> | multiplier | 0.850       | 1.150       | HRU 06 plant uptake compensation factor |
| <i>epco_07</i> | multiplier | 0.850       | 1.150       | HRU 07 plant uptake compensation factor |
| <i>epco_08</i> | multiplier | 0.850       | 1.150       | HRU 08 plant uptake compensation factor |
| <i>epco_09</i> | multiplier | 0.850       | 1.150       | HRU 09 plant uptake compensation factor |
| <i>epco_10</i> | multiplier | 0.850       | 1.150       | HRU 10 plant uptake compensation factor |
| <i>epco_11</i> | multiplier | 0.850       | 1.150       | HRU 11 plant uptake compensation factor |
| <i>epco_12</i> | multiplier | 0.850       | 1.150       | HRU 12 plant uptake compensation factor |
| <i>epco_13</i> | multiplier | 0.850       | 1.150       | HRU 13 plant uptake compensation factor |
| <i>epco_14</i> | multiplier | 0.850       | 1.150       | HRU 14 plant uptake compensation factor |
| <i>epco_15</i> | multiplier | 0.850       | 1.150       | HRU 15 plant uptake compensation factor |
| <i>epco_16</i> | multiplier | 0.850       | 1.150       | HRU 16 plant uptake compensation factor |
| <i>epco_17</i> | multiplier | 0.850       | 1.150       | HRU 17 plant uptake compensation factor |
| <i>epco_18</i> | multiplier | 0.850       | 1.150       | HRU 18 plant uptake compensation factor |
| <i>epco_19</i> | multiplier | 0.850       | 1.150       | HRU 19 plant uptake compensation factor |
| <i>epco_20</i> | multiplier | 0.850       | 1.150       | HRU 20 plant uptake compensation factor |
| <i>epco_21</i> | multiplier | 0.850       | 1.150       | HRU 21 plant uptake compensation factor |
| <i>epco_22</i> | multiplier | 0.850       | 1.150       | HRU 22 plant uptake compensation factor |
| <i>epco_23</i> | multiplier | 0.850       | 1.150       | HRU 23 plant uptake compensation factor |
| <i>epco_24</i> | multiplier | 0.850       | 1.150       | HRU 24 plant uptake compensation factor |
| <i>epco_25</i> | multiplier | 0.850       | 1.150       | HRU 25 plant uptake compensation factor |
| <i>epco_26</i> | multiplier | 0.850       | 1.150       | HRU 26 plant uptake compensation factor |
| <i>epco_27</i> | multiplier | 0.850       | 1.150       | HRU 27 plant uptake compensation factor |
| <i>epco_28</i> | multiplier | 0.850       | 1.150       | HRU 28 plant uptake compensation factor |
| <i>epco_29</i> | multiplier | 0.850       | 1.150       | HRU 29 plant uptake compensation factor |
| <i>epco_30</i> | multiplier | 0.850       | 1.150       | HRU 30 plant uptake compensation factor |
| <i>epco_31</i> | multiplier | 0.850       | 1.150       | HRU 31 plant uptake compensation factor |
| <i>epco_32</i> | multiplier | 0.850       | 1.150       | HRU 32 plant uptake compensation factor |
| <i>epco_33</i> | multiplier | 0.850       | 1.150       | HRU 33 plant uptake compensation factor |
| <i>epco_34</i> | multiplier | 0.850       | 1.150       | HRU 34 plant uptake compensation factor |
| <i>epco_35</i> | multiplier | 0.850       | 1.150       | HRU 35 plant uptake compensation factor |
| <i>epco_36</i> | multiplier | 0.850       | 1.150       | HRU 36 plant uptake compensation factor |
| <i>epco_37</i> | multiplier | 0.850       | 1.150       | HRU 37 plant uptake compensation factor |
| <i>epco_38</i> | multiplier | 0.850       | 1.150       | HRU 38 plant uptake compensation factor |
| <i>epco_39</i> | multiplier | 0.850       | 1.150       | HRU 39 plant uptake compensation factor |
| <i>epco_40</i> | multiplier | 0.850       | 1.150       | HRU 40 plant uptake compensation factor |
| <i>epco_41</i> | multiplier | 0.850       | 1.150       | HRU 41 plant uptake compensation factor |
| <i>epco_42</i> | multiplier | 0.850       | 1.150       | HRU 42 plant uptake compensation factor |
| <i>epco_43</i> | multiplier | 0.850       | 1.150       | HRU 43 plant uptake compensation factor |
| <i>epco_44</i> | multiplier | 0.850       | 1.150       | HRU 44 plant uptake compensation factor |
| <i>epco_45</i> | multiplier | 0.850       | 1.150       | HRU 45 plant uptake compensation factor |
| <i>epco_46</i> | multiplier | 0.850       | 1.150       | HRU 46 plant uptake compensation factor |

Continued on next page

| Parameter      | Type       | Lower Bound | Upper Bound | Description (with units if applicable)      |
|----------------|------------|-------------|-------------|---------------------------------------------|
| <i>epco_47</i> | multiplier | 0.850       | 1.150       | HRU 47 plant uptake compensation factor     |
| <i>epco_v</i>  | value      | 0.500       | 0.980       | subbasin plant uptake compensation factor   |
| <i>esco_01</i> | multiplier | 0.850       | 1.150       | HRU 01 soil evaporation compensation factor |
| <i>esco_02</i> | multiplier | 0.850       | 1.150       | HRU 02 soil evaporation compensation factor |
| <i>esco_03</i> | multiplier | 0.850       | 1.150       | HRU 03 soil evaporation compensation factor |
| <i>esco_04</i> | multiplier | 0.850       | 1.150       | HRU 04 soil evaporation compensation factor |
| <i>esco_05</i> | multiplier | 0.850       | 1.150       | HRU 05 soil evaporation compensation factor |
| <i>esco_06</i> | multiplier | 0.850       | 1.150       | HRU 06 soil evaporation compensation factor |
| <i>esco_07</i> | multiplier | 0.850       | 1.150       | HRU 07 soil evaporation compensation factor |
| <i>esco_08</i> | multiplier | 0.850       | 1.150       | HRU 08 soil evaporation compensation factor |
| <i>esco_09</i> | multiplier | 0.850       | 1.150       | HRU 09 soil evaporation compensation factor |
| <i>esco_10</i> | multiplier | 0.850       | 1.150       | HRU 10 soil evaporation compensation factor |
| <i>esco_11</i> | multiplier | 0.850       | 1.150       | HRU 11 soil evaporation compensation factor |
| <i>esco_12</i> | multiplier | 0.850       | 1.150       | HRU 12 soil evaporation compensation factor |
| <i>esco_13</i> | multiplier | 0.850       | 1.150       | HRU 13 soil evaporation compensation factor |
| <i>esco_14</i> | multiplier | 0.850       | 1.150       | HRU 14 soil evaporation compensation factor |
| <i>esco_15</i> | multiplier | 0.850       | 1.150       | HRU 15 soil evaporation compensation factor |
| <i>esco_16</i> | multiplier | 0.850       | 1.150       | HRU 16 soil evaporation compensation factor |
| <i>esco_17</i> | multiplier | 0.850       | 1.150       | HRU 17 soil evaporation compensation factor |
| <i>esco_18</i> | multiplier | 0.850       | 1.150       | HRU 18 soil evaporation compensation factor |
| <i>esco_19</i> | multiplier | 0.850       | 1.150       | HRU 19 soil evaporation compensation factor |
| <i>esco_20</i> | multiplier | 0.850       | 1.150       | HRU 20 soil evaporation compensation factor |
| <i>esco_21</i> | multiplier | 0.850       | 1.150       | HRU 21 soil evaporation compensation factor |
| <i>esco_22</i> | multiplier | 0.850       | 1.150       | HRU 22 soil evaporation compensation factor |
| <i>esco_23</i> | multiplier | 0.850       | 1.150       | HRU 23 soil evaporation compensation factor |
| <i>esco_24</i> | multiplier | 0.850       | 1.150       | HRU 24 soil evaporation compensation factor |
| <i>esco_25</i> | multiplier | 0.850       | 1.150       | HRU 25 soil evaporation compensation factor |
| <i>esco_26</i> | multiplier | 0.850       | 1.150       | HRU 26 soil evaporation compensation factor |
| <i>esco_27</i> | multiplier | 0.850       | 1.150       | HRU 27 soil evaporation compensation factor |
| <i>esco_28</i> | multiplier | 0.850       | 1.150       | HRU 28 soil evaporation compensation factor |
| <i>esco_29</i> | multiplier | 0.850       | 1.150       | HRU 29 soil evaporation compensation factor |
| <i>esco_30</i> | multiplier | 0.850       | 1.150       | HRU 30 soil evaporation compensation factor |
| <i>esco_31</i> | multiplier | 0.850       | 1.150       | HRU 31 soil evaporation compensation factor |
| <i>esco_32</i> | multiplier | 0.850       | 1.150       | HRU 32 soil evaporation compensation factor |
| <i>esco_33</i> | multiplier | 0.850       | 1.150       | HRU 33 soil evaporation compensation factor |
| <i>esco_34</i> | multiplier | 0.850       | 1.150       | HRU 34 soil evaporation compensation factor |
| <i>esco_35</i> | multiplier | 0.850       | 1.150       | HRU 35 soil evaporation compensation factor |
| <i>esco_36</i> | multiplier | 0.850       | 1.150       | HRU 36 soil evaporation compensation factor |
| <i>esco_37</i> | multiplier | 0.850       | 1.150       | HRU 37 soil evaporation compensation factor |
| <i>esco_38</i> | multiplier | 0.850       | 1.150       | HRU 38 soil evaporation compensation factor |
| <i>esco_39</i> | multiplier | 0.850       | 1.150       | HRU 39 soil evaporation compensation factor |

Continued on next page

| Parameter          | Type       | Lower Bound | Upper Bound | Description (with units if applicable)        |
|--------------------|------------|-------------|-------------|-----------------------------------------------|
| <i>esco_40</i>     | multiplier | 0.850       | 1.150       | HRU 40 soil evaporation compensation factor   |
| <i>esco_41</i>     | multiplier | 0.850       | 1.150       | HRU 41 soil evaporation compensation factor   |
| <i>esco_42</i>     | multiplier | 0.850       | 1.150       | HRU 42 soil evaporation compensation factor   |
| <i>esco_43</i>     | multiplier | 0.850       | 1.150       | HRU 43 soil evaporation compensation factor   |
| <i>esco_44</i>     | multiplier | 0.850       | 1.150       | HRU 44 soil evaporation compensation factor   |
| <i>esco_45</i>     | multiplier | 0.850       | 1.150       | HRU 45 soil evaporation compensation factor   |
| <i>esco_46</i>     | multiplier | 0.850       | 1.150       | HRU 46 soil evaporation compensation factor   |
| <i>esco_47</i>     | multiplier | 0.850       | 1.150       | HRU 47 soil evaporation compensation factor   |
| <i>esco_v</i>      | value      | 0.500       | 0.980       | subbasin soil evaporation compensation factor |
| <i>evrch_r</i>     | multiplier | 0.500       | 1.500       | subbasin reach evaporation adjustment factor  |
| <i>gw_delay_01</i> | multiplier | 0.850       | 1.150       | HRU 01 groundwater delay time (days)          |
| <i>gw_delay_02</i> | multiplier | 0.850       | 1.150       | HRU 02 groundwater delay time (days)          |
| <i>gw_delay_03</i> | multiplier | 0.850       | 1.150       | HRU 03 groundwater delay time (days)          |
| <i>gw_delay_04</i> | multiplier | 0.850       | 1.150       | HRU 04 groundwater delay time (days)          |
| <i>gw_delay_05</i> | multiplier | 0.850       | 1.150       | HRU 05 groundwater delay time (days)          |
| <i>gw_delay_06</i> | multiplier | 0.850       | 1.150       | HRU 06 groundwater delay time (days)          |
| <i>gw_delay_07</i> | multiplier | 0.850       | 1.150       | HRU 07 groundwater delay time (days)          |
| <i>gw_delay_08</i> | multiplier | 0.850       | 1.150       | HRU 08 groundwater delay time (days)          |
| <i>gw_delay_09</i> | multiplier | 0.850       | 1.150       | HRU 09 groundwater delay time (days)          |
| <i>gw_delay_10</i> | multiplier | 0.850       | 1.150       | HRU 10 groundwater delay time (days)          |
| <i>gw_delay_11</i> | multiplier | 0.850       | 1.150       | HRU 11 groundwater delay time (days)          |
| <i>gw_delay_12</i> | multiplier | 0.850       | 1.150       | HRU 12 groundwater delay time (days)          |
| <i>gw_delay_13</i> | multiplier | 0.850       | 1.150       | HRU 13 groundwater delay time (days)          |
| <i>gw_delay_14</i> | multiplier | 0.850       | 1.150       | HRU 14 groundwater delay time (days)          |
| <i>gw_delay_15</i> | multiplier | 0.850       | 1.150       | HRU 15 groundwater delay time (days)          |
| <i>gw_delay_16</i> | multiplier | 0.850       | 1.150       | HRU 16 groundwater delay time (days)          |
| <i>gw_delay_17</i> | multiplier | 0.850       | 1.150       | HRU 17 groundwater delay time (days)          |
| <i>gw_delay_18</i> | multiplier | 0.850       | 1.150       | HRU 18 groundwater delay time (days)          |
| <i>gw_delay_19</i> | multiplier | 0.850       | 1.150       | HRU 19 groundwater delay time (days)          |
| <i>gw_delay_20</i> | multiplier | 0.850       | 1.150       | HRU 20 groundwater delay time (days)          |
| <i>gw_delay_21</i> | multiplier | 0.850       | 1.150       | HRU 21 groundwater delay time (days)          |
| <i>gw_delay_22</i> | multiplier | 0.850       | 1.150       | HRU 22 groundwater delay time (days)          |
| <i>gw_delay_23</i> | multiplier | 0.850       | 1.150       | HRU 23 groundwater delay time (days)          |
| <i>gw_delay_24</i> | multiplier | 0.850       | 1.150       | HRU 24 groundwater delay time (days)          |
| <i>gw_delay_25</i> | multiplier | 0.850       | 1.150       | HRU 25 groundwater delay time (days)          |
| <i>gw_delay_26</i> | multiplier | 0.850       | 1.150       | HRU 26 groundwater delay time (days)          |
| <i>gw_delay_27</i> | multiplier | 0.850       | 1.150       | HRU 27 groundwater delay time (days)          |
| <i>gw_delay_28</i> | multiplier | 0.850       | 1.150       | HRU 28 groundwater delay time (days)          |
| <i>gw_delay_29</i> | multiplier | 0.850       | 1.150       | HRU 29 groundwater delay time (days)          |
| <i>gw_delay_30</i> | multiplier | 0.850       | 1.150       | HRU 30 groundwater delay time (days)          |
| <i>gw_delay_31</i> | multiplier | 0.850       | 1.150       | HRU 31 groundwater delay time (days)          |

Continued on next page



| Parameter          | Type       | Lower Bound | Upper Bound | Description (with units if applicable) |
|--------------------|------------|-------------|-------------|----------------------------------------|
| <i>gw_delay_32</i> | multiplier | 0.850       | 1.150       | HRU 32 groundwater delay time (days)   |
| <i>gw_delay_33</i> | multiplier | 0.850       | 1.150       | HRU 33 groundwater delay time (days)   |
| <i>gw_delay_34</i> | multiplier | 0.850       | 1.150       | HRU 34 groundwater delay time (days)   |
| <i>gw_delay_35</i> | multiplier | 0.850       | 1.150       | HRU 35 groundwater delay time (days)   |
| <i>gw_delay_36</i> | multiplier | 0.850       | 1.150       | HRU 36 groundwater delay time (days)   |
| <i>gw_delay_37</i> | multiplier | 0.850       | 1.150       | HRU 37 groundwater delay time (days)   |
| <i>gw_delay_38</i> | multiplier | 0.850       | 1.150       | HRU 38 groundwater delay time (days)   |
| <i>gw_delay_39</i> | multiplier | 0.850       | 1.150       | HRU 39 groundwater delay time (days)   |
| <i>gw_delay_40</i> | multiplier | 0.850       | 1.150       | HRU 40 groundwater delay time (days)   |
| <i>gw_delay_41</i> | multiplier | 0.850       | 1.150       | HRU 41 groundwater delay time (days)   |
| <i>gw_delay_42</i> | multiplier | 0.850       | 1.150       | HRU 42 groundwater delay time (days)   |
| <i>gw_delay_43</i> | multiplier | 0.850       | 1.150       | HRU 43 groundwater delay time (days)   |
| <i>gw_delay_44</i> | multiplier | 0.850       | 1.150       | HRU 44 groundwater delay time (days)   |
| <i>gw_delay_45</i> | multiplier | 0.850       | 1.150       | HRU 45 groundwater delay time (days)   |
| <i>gw_delay_46</i> | multiplier | 0.850       | 1.150       | HRU 46 groundwater delay time (days)   |
| <i>gw_delay_47</i> | multiplier | 0.850       | 1.150       | HRU 47 groundwater delay time (days)   |
| <i>gw_delay_v</i>  | value      | 10.000      | 300.000     | subbasin groundwater delay time (days) |
| <i>gw_revap_01</i> | multiplier | 0.850       | 1.150       | HRU 01 groundwater 'revap' coefficient |
| <i>gw_revap_02</i> | multiplier | 0.850       | 1.150       | HRU 02 groundwater 'revap' coefficient |
| <i>gw_revap_03</i> | multiplier | 0.850       | 1.150       | HRU 03 groundwater 'revap' coefficient |
| <i>gw_revap_04</i> | multiplier | 0.850       | 1.150       | HRU 04 groundwater 'revap' coefficient |
| <i>gw_revap_05</i> | multiplier | 0.850       | 1.150       | HRU 05 groundwater 'revap' coefficient |
| <i>gw_revap_06</i> | multiplier | 0.850       | 1.150       | HRU 06 groundwater 'revap' coefficient |
| <i>gw_revap_07</i> | multiplier | 0.850       | 1.150       | HRU 07 groundwater 'revap' coefficient |
| <i>gw_revap_08</i> | multiplier | 0.850       | 1.150       | HRU 08 groundwater 'revap' coefficient |
| <i>gw_revap_09</i> | multiplier | 0.850       | 1.150       | HRU 09 groundwater 'revap' coefficient |
| <i>gw_revap_10</i> | multiplier | 0.850       | 1.150       | HRU 10 groundwater 'revap' coefficient |
| <i>gw_revap_11</i> | multiplier | 0.850       | 1.150       | HRU 11 groundwater 'revap' coefficient |
| <i>gw_revap_12</i> | multiplier | 0.850       | 1.150       | HRU 12 groundwater 'revap' coefficient |
| <i>gw_revap_13</i> | multiplier | 0.850       | 1.150       | HRU 13 groundwater 'revap' coefficient |
| <i>gw_revap_14</i> | multiplier | 0.850       | 1.150       | HRU 14 groundwater 'revap' coefficient |
| <i>gw_revap_15</i> | multiplier | 0.850       | 1.150       | HRU 15 groundwater 'revap' coefficient |
| <i>gw_revap_16</i> | multiplier | 0.850       | 1.150       | HRU 16 groundwater 'revap' coefficient |
| <i>gw_revap_17</i> | multiplier | 0.850       | 1.150       | HRU 17 groundwater 'revap' coefficient |
| <i>gw_revap_18</i> | multiplier | 0.850       | 1.150       | HRU 18 groundwater 'revap' coefficient |
| <i>gw_revap_19</i> | multiplier | 0.850       | 1.150       | HRU 19 groundwater 'revap' coefficient |
| <i>gw_revap_20</i> | multiplier | 0.850       | 1.150       | HRU 20 groundwater 'revap' coefficient |
| <i>gw_revap_21</i> | multiplier | 0.850       | 1.150       | HRU 21 groundwater 'revap' coefficient |
| <i>gw_revap_22</i> | multiplier | 0.850       | 1.150       | HRU 22 groundwater 'revap' coefficient |
| <i>gw_revap_23</i> | multiplier | 0.850       | 1.150       | HRU 23 groundwater 'revap' coefficient |
| <i>gw_revap_24</i> | multiplier | 0.850       | 1.150       | HRU 24 groundwater 'revap' coefficient |

Continued on next page

| Parameter          | Type       | Lower Bound | Upper Bound | Description (with units if applicable)              |
|--------------------|------------|-------------|-------------|-----------------------------------------------------|
| <i>gw_revap_25</i> | multiplier | 0.850       | 1.150       | HRU 25 groundwater 'revap' coefficient              |
| <i>gw_revap_26</i> | multiplier | 0.850       | 1.150       | HRU 26 groundwater 'revap' coefficient              |
| <i>gw_revap_27</i> | multiplier | 0.850       | 1.150       | HRU 27 groundwater 'revap' coefficient              |
| <i>gw_revap_28</i> | multiplier | 0.850       | 1.150       | HRU 28 groundwater 'revap' coefficient              |
| <i>gw_revap_29</i> | multiplier | 0.850       | 1.150       | HRU 29 groundwater 'revap' coefficient              |
| <i>gw_revap_30</i> | multiplier | 0.850       | 1.150       | HRU 30 groundwater 'revap' coefficient              |
| <i>gw_revap_31</i> | multiplier | 0.850       | 1.150       | HRU 31 groundwater 'revap' coefficient              |
| <i>gw_revap_32</i> | multiplier | 0.850       | 1.150       | HRU 32 groundwater 'revap' coefficient              |
| <i>gw_revap_33</i> | multiplier | 0.850       | 1.150       | HRU 33 groundwater 'revap' coefficient              |
| <i>gw_revap_34</i> | multiplier | 0.850       | 1.150       | HRU 34 groundwater 'revap' coefficient              |
| <i>gw_revap_35</i> | multiplier | 0.850       | 1.150       | HRU 35 groundwater 'revap' coefficient              |
| <i>gw_revap_36</i> | multiplier | 0.850       | 1.150       | HRU 36 groundwater 'revap' coefficient              |
| <i>gw_revap_37</i> | multiplier | 0.850       | 1.150       | HRU 37 groundwater 'revap' coefficient              |
| <i>gw_revap_38</i> | multiplier | 0.850       | 1.150       | HRU 38 groundwater 'revap' coefficient              |
| <i>gw_revap_39</i> | multiplier | 0.850       | 1.150       | HRU 39 groundwater 'revap' coefficient              |
| <i>gw_revap_40</i> | multiplier | 0.850       | 1.150       | HRU 40 groundwater 'revap' coefficient              |
| <i>gw_revap_41</i> | multiplier | 0.850       | 1.150       | HRU 41 groundwater 'revap' coefficient              |
| <i>gw_revap_42</i> | multiplier | 0.850       | 1.150       | HRU 42 groundwater 'revap' coefficient              |
| <i>gw_revap_43</i> | multiplier | 0.850       | 1.150       | HRU 43 groundwater 'revap' coefficient              |
| <i>gw_revap_44</i> | multiplier | 0.850       | 1.150       | HRU 44 groundwater 'revap' coefficient              |
| <i>gw_revap_45</i> | multiplier | 0.850       | 1.150       | HRU 45 groundwater 'revap' coefficient              |
| <i>gw_revap_46</i> | multiplier | 0.850       | 1.150       | HRU 46 groundwater 'revap' coefficient              |
| <i>gw_revap_47</i> | multiplier | 0.850       | 1.150       | HRU 47 groundwater 'revap' coefficient              |
| <i>gw_revap_v</i>  | value      | 0.020       | 0.400       | subbasin groundwater 'revap' coefficient            |
| <i>gwqmn_01</i>    | multiplier | 0.850       | 1.150       | HRU 01 groundwater threshold return flow depth (mm) |
| <i>gwqmn_02</i>    | multiplier | 0.850       | 1.150       | HRU 02 groundwater threshold return flow depth (mm) |
| <i>gwqmn_03</i>    | multiplier | 0.850       | 1.150       | HRU 03 groundwater threshold return flow depth (mm) |
| <i>gwqmn_04</i>    | multiplier | 0.850       | 1.150       | HRU 04 groundwater threshold return flow depth (mm) |
| <i>gwqmn_05</i>    | multiplier | 0.850       | 1.150       | HRU 05 groundwater threshold return flow depth (mm) |
| <i>gwqmn_06</i>    | multiplier | 0.850       | 1.150       | HRU 06 groundwater threshold return flow depth (mm) |
| <i>gwqmn_07</i>    | multiplier | 0.850       | 1.150       | HRU 07 groundwater threshold return flow depth (mm) |
| <i>gwqmn_08</i>    | multiplier | 0.850       | 1.150       | HRU 08 groundwater threshold return flow depth (mm) |
| <i>gwqmn_09</i>    | multiplier | 0.850       | 1.150       | HRU 09 groundwater threshold return flow depth (mm) |
| <i>gwqmn_10</i>    | multiplier | 0.850       | 1.150       | HRU 10 groundwater threshold return flow depth (mm) |
| <i>gwqmn_11</i>    | multiplier | 0.850       | 1.150       | HRU 11 groundwater threshold return flow depth (mm) |
| <i>gwqmn_12</i>    | multiplier | 0.850       | 1.150       | HRU 12 groundwater threshold return flow depth (mm) |
| <i>gwqmn_13</i>    | multiplier | 0.850       | 1.150       | HRU 13 groundwater threshold return flow depth (mm) |
| <i>gwqmn_14</i>    | multiplier | 0.850       | 1.150       | HRU 14 groundwater threshold return flow depth (mm) |
| <i>gwqmn_15</i>    | multiplier | 0.850       | 1.150       | HRU 15 groundwater threshold return flow depth (mm) |
| <i>gwqmn_16</i>    | multiplier | 0.850       | 1.150       | HRU 16 groundwater threshold return flow depth (mm) |
| <i>gwqmn_17</i>    | multiplier | 0.850       | 1.150       | HRU 17 groundwater threshold return flow depth (mm) |

Continued on next page

| Parameter         | Type       | Lower Bound | Upper Bound | Description (with units if applicable)                |
|-------------------|------------|-------------|-------------|-------------------------------------------------------|
| <i>gwqmn_18</i>   | multiplier | 0.850       | 1.150       | HRU 18 groundwater threshold return flow depth (mm)   |
| <i>gwqmn_19</i>   | multiplier | 0.850       | 1.150       | HRU 19 groundwater threshold return flow depth (mm)   |
| <i>gwqmn_20</i>   | multiplier | 0.850       | 1.150       | HRU 20 groundwater threshold return flow depth (mm)   |
| <i>gwqmn_21</i>   | multiplier | 0.850       | 1.150       | HRU 21 groundwater threshold return flow depth (mm)   |
| <i>gwqmn_22</i>   | multiplier | 0.850       | 1.150       | HRU 22 groundwater threshold return flow depth (mm)   |
| <i>gwqmn_23</i>   | multiplier | 0.850       | 1.150       | HRU 23 groundwater threshold return flow depth (mm)   |
| <i>gwqmn_24</i>   | multiplier | 0.850       | 1.150       | HRU 24 groundwater threshold return flow depth (mm)   |
| <i>gwqmn_25</i>   | multiplier | 0.850       | 1.150       | HRU 25 groundwater threshold return flow depth (mm)   |
| <i>gwqmn_26</i>   | multiplier | 0.850       | 1.150       | HRU 26 groundwater threshold return flow depth (mm)   |
| <i>gwqmn_27</i>   | multiplier | 0.850       | 1.150       | HRU 27 groundwater threshold return flow depth (mm)   |
| <i>gwqmn_28</i>   | multiplier | 0.850       | 1.150       | HRU 28 groundwater threshold return flow depth (mm)   |
| <i>gwqmn_29</i>   | multiplier | 0.850       | 1.150       | HRU 29 groundwater threshold return flow depth (mm)   |
| <i>gwqmn_30</i>   | multiplier | 0.850       | 1.150       | HRU 30 groundwater threshold return flow depth (mm)   |
| <i>gwqmn_31</i>   | multiplier | 0.850       | 1.150       | HRU 31 groundwater threshold return flow depth (mm)   |
| <i>gwqmn_32</i>   | multiplier | 0.850       | 1.150       | HRU 32 groundwater threshold return flow depth (mm)   |
| <i>gwqmn_33</i>   | multiplier | 0.850       | 1.150       | HRU 33 groundwater threshold return flow depth (mm)   |
| <i>gwqmn_34</i>   | multiplier | 0.850       | 1.150       | HRU 34 groundwater threshold return flow depth (mm)   |
| <i>gwqmn_35</i>   | multiplier | 0.850       | 1.150       | HRU 35 groundwater threshold return flow depth (mm)   |
| <i>gwqmn_36</i>   | multiplier | 0.850       | 1.150       | HRU 36 groundwater threshold return flow depth (mm)   |
| <i>gwqmn_37</i>   | multiplier | 0.850       | 1.150       | HRU 37 groundwater threshold return flow depth (mm)   |
| <i>gwqmn_38</i>   | multiplier | 0.850       | 1.150       | HRU 38 groundwater threshold return flow depth (mm)   |
| <i>gwqmn_39</i>   | multiplier | 0.850       | 1.150       | HRU 39 groundwater threshold return flow depth (mm)   |
| <i>gwqmn_40</i>   | multiplier | 0.850       | 1.150       | HRU 40 groundwater threshold return flow depth (mm)   |
| <i>gwqmn_41</i>   | multiplier | 0.850       | 1.150       | HRU 41 groundwater threshold return flow depth (mm)   |
| <i>gwqmn_42</i>   | multiplier | 0.850       | 1.150       | HRU 42 groundwater threshold return flow depth (mm)   |
| <i>gwqmn_43</i>   | multiplier | 0.850       | 1.150       | HRU 43 groundwater threshold return flow depth (mm)   |
| <i>gwqmn_44</i>   | multiplier | 0.850       | 1.150       | HRU 44 groundwater threshold return flow depth (mm)   |
| <i>gwqmn_45</i>   | multiplier | 0.850       | 1.150       | HRU 45 groundwater threshold return flow depth (mm)   |
| <i>gwqmn_46</i>   | multiplier | 0.850       | 1.150       | HRU 46 groundwater threshold return flow depth (mm)   |
| <i>gwqmn_47</i>   | multiplier | 0.850       | 1.150       | HRU 47 groundwater threshold return flow depth (mm)   |
| <i>gwqmn_v</i>    | value      | 500.000     | 4000.000    | subbasin groundwater threshold return flow depth (mm) |
| <i>hru_slp_01</i> | multiplier | 0.850       | 1.150       | HRU 01 average slope steepness ( $m/m$ )              |
| <i>hru_slp_02</i> | multiplier | 0.850       | 1.150       | HRU 02 average slope steepness ( $m/m$ )              |
| <i>hru_slp_03</i> | multiplier | 0.850       | 1.150       | HRU 03 average slope steepness ( $m/m$ )              |
| <i>hru_slp_04</i> | multiplier | 0.850       | 1.150       | HRU 04 average slope steepness ( $m/m$ )              |
| <i>hru_slp_05</i> | multiplier | 0.850       | 1.150       | HRU 05 average slope steepness ( $m/m$ )              |
| <i>hru_slp_06</i> | multiplier | 0.850       | 1.150       | HRU 06 average slope steepness ( $m/m$ )              |
| <i>hru_slp_07</i> | multiplier | 0.850       | 1.150       | HRU 07 average slope steepness ( $m/m$ )              |
| <i>hru_slp_08</i> | multiplier | 0.850       | 1.150       | HRU 08 average slope steepness ( $m/m$ )              |
| <i>hru_slp_09</i> | multiplier | 0.850       | 1.150       | HRU 09 average slope steepness ( $m/m$ )              |
| <i>hru_slp_10</i> | multiplier | 0.850       | 1.150       | HRU 10 average slope steepness ( $m/m$ )              |

Continued on next page

| Parameter         | Type       | Lower Bound | Upper Bound | Description (with units if applicable)             |
|-------------------|------------|-------------|-------------|----------------------------------------------------|
| <i>hru_slp_11</i> | multiplier | 0.850       | 1.150       | HRU 11 average slope steepness ( $\frac{m}{m}$ )   |
| <i>hru_slp_12</i> | multiplier | 0.850       | 1.150       | HRU 12 average slope steepness ( $\frac{m}{m}$ )   |
| <i>hru_slp_13</i> | multiplier | 0.850       | 1.150       | HRU 13 average slope steepness ( $\frac{m}{m}$ )   |
| <i>hru_slp_14</i> | multiplier | 0.850       | 1.150       | HRU 14 average slope steepness ( $\frac{m}{m}$ )   |
| <i>hru_slp_15</i> | multiplier | 0.850       | 1.150       | HRU 15 average slope steepness ( $\frac{m}{m}$ )   |
| <i>hru_slp_16</i> | multiplier | 0.850       | 1.150       | HRU 16 average slope steepness ( $\frac{m}{m}$ )   |
| <i>hru_slp_17</i> | multiplier | 0.850       | 1.150       | HRU 17 average slope steepness ( $\frac{m}{m}$ )   |
| <i>hru_slp_18</i> | multiplier | 0.850       | 1.150       | HRU 18 average slope steepness ( $\frac{m}{m}$ )   |
| <i>hru_slp_19</i> | multiplier | 0.850       | 1.150       | HRU 19 average slope steepness ( $\frac{m}{m}$ )   |
| <i>hru_slp_20</i> | multiplier | 0.850       | 1.150       | HRU 20 average slope steepness ( $\frac{m}{m}$ )   |
| <i>hru_slp_21</i> | multiplier | 0.850       | 1.150       | HRU 21 average slope steepness ( $\frac{m}{m}$ )   |
| <i>hru_slp_22</i> | multiplier | 0.850       | 1.150       | HRU 22 average slope steepness ( $\frac{m}{m}$ )   |
| <i>hru_slp_23</i> | multiplier | 0.850       | 1.150       | HRU 23 average slope steepness ( $\frac{m}{m}$ )   |
| <i>hru_slp_24</i> | multiplier | 0.850       | 1.150       | HRU 24 average slope steepness ( $\frac{m}{m}$ )   |
| <i>hru_slp_25</i> | multiplier | 0.850       | 1.150       | HRU 25 average slope steepness ( $\frac{m}{m}$ )   |
| <i>hru_slp_26</i> | multiplier | 0.850       | 1.150       | HRU 26 average slope steepness ( $\frac{m}{m}$ )   |
| <i>hru_slp_27</i> | multiplier | 0.850       | 1.150       | HRU 27 average slope steepness ( $\frac{m}{m}$ )   |
| <i>hru_slp_28</i> | multiplier | 0.850       | 1.150       | HRU 28 average slope steepness ( $\frac{m}{m}$ )   |
| <i>hru_slp_29</i> | multiplier | 0.850       | 1.150       | HRU 29 average slope steepness ( $\frac{m}{m}$ )   |
| <i>hru_slp_30</i> | multiplier | 0.850       | 1.150       | HRU 30 average slope steepness ( $\frac{m}{m}$ )   |
| <i>hru_slp_31</i> | multiplier | 0.850       | 1.150       | HRU 31 average slope steepness ( $\frac{m}{m}$ )   |
| <i>hru_slp_32</i> | multiplier | 0.850       | 1.150       | HRU 32 average slope steepness ( $\frac{m}{m}$ )   |
| <i>hru_slp_33</i> | multiplier | 0.850       | 1.150       | HRU 33 average slope steepness ( $\frac{m}{m}$ )   |
| <i>hru_slp_34</i> | multiplier | 0.850       | 1.150       | HRU 34 average slope steepness ( $\frac{m}{m}$ )   |
| <i>hru_slp_35</i> | multiplier | 0.850       | 1.150       | HRU 35 average slope steepness ( $\frac{m}{m}$ )   |
| <i>hru_slp_36</i> | multiplier | 0.850       | 1.150       | HRU 36 average slope steepness ( $\frac{m}{m}$ )   |
| <i>hru_slp_37</i> | multiplier | 0.850       | 1.150       | HRU 37 average slope steepness ( $\frac{m}{m}$ )   |
| <i>hru_slp_38</i> | multiplier | 0.850       | 1.150       | HRU 38 average slope steepness ( $\frac{m}{m}$ )   |
| <i>hru_slp_39</i> | multiplier | 0.850       | 1.150       | HRU 39 average slope steepness ( $\frac{m}{m}$ )   |
| <i>hru_slp_40</i> | multiplier | 0.850       | 1.150       | HRU 40 average slope steepness ( $\frac{m}{m}$ )   |
| <i>hru_slp_41</i> | multiplier | 0.850       | 1.150       | HRU 41 average slope steepness ( $\frac{m}{m}$ )   |
| <i>hru_slp_42</i> | multiplier | 0.850       | 1.150       | HRU 42 average slope steepness ( $\frac{m}{m}$ )   |
| <i>hru_slp_43</i> | multiplier | 0.850       | 1.150       | HRU 43 average slope steepness ( $\frac{m}{m}$ )   |
| <i>hru_slp_44</i> | multiplier | 0.850       | 1.150       | HRU 44 average slope steepness ( $\frac{m}{m}$ )   |
| <i>hru_slp_45</i> | multiplier | 0.850       | 1.150       | HRU 45 average slope steepness ( $\frac{m}{m}$ )   |
| <i>hru_slp_46</i> | multiplier | 0.850       | 1.150       | HRU 46 average slope steepness ( $\frac{m}{m}$ )   |
| <i>hru_slp_47</i> | multiplier | 0.850       | 1.150       | HRU 47 average slope steepness ( $\frac{m}{m}$ )   |
| <i>hru_slp_r</i>  | multiplier | 0.500       | 1.500       | subbasin average slope steepness ( $\frac{m}{m}$ ) |
| <i>ov_n_01</i>    | multiplier | 0.850       | 1.150       | HRU 01 overland flow Manning's 'n'                 |
| <i>ov_n_02</i>    | multiplier | 0.850       | 1.150       | HRU 02 overland flow Manning's 'n'                 |
| <i>ov_n_03</i>    | multiplier | 0.850       | 1.150       | HRU 03 overland flow Manning's 'n'                 |

Continued on next page

| Parameter      | Type       | Lower Bound | Upper Bound | Description (with units if applicable) |
|----------------|------------|-------------|-------------|----------------------------------------|
| <i>ov_n_04</i> | multiplier | 0.850       | 1.150       | HRU 04 overland flow Manning's 'n'     |
| <i>ov_n_05</i> | multiplier | 0.850       | 1.150       | HRU 05 overland flow Manning's 'n'     |
| <i>ov_n_06</i> | multiplier | 0.850       | 1.150       | HRU 06 overland flow Manning's 'n'     |
| <i>ov_n_07</i> | multiplier | 0.850       | 1.150       | HRU 07 overland flow Manning's 'n'     |
| <i>ov_n_08</i> | multiplier | 0.850       | 1.150       | HRU 08 overland flow Manning's 'n'     |
| <i>ov_n_09</i> | multiplier | 0.850       | 1.150       | HRU 09 overland flow Manning's 'n'     |
| <i>ov_n_10</i> | multiplier | 0.850       | 1.150       | HRU 10 overland flow Manning's 'n'     |
| <i>ov_n_11</i> | multiplier | 0.850       | 1.150       | HRU 11 overland flow Manning's 'n'     |
| <i>ov_n_12</i> | multiplier | 0.850       | 1.150       | HRU 12 overland flow Manning's 'n'     |
| <i>ov_n_13</i> | multiplier | 0.850       | 1.150       | HRU 13 overland flow Manning's 'n'     |
| <i>ov_n_14</i> | multiplier | 0.850       | 1.150       | HRU 14 overland flow Manning's 'n'     |
| <i>ov_n_15</i> | multiplier | 0.850       | 1.150       | HRU 15 overland flow Manning's 'n'     |
| <i>ov_n_16</i> | multiplier | 0.850       | 1.150       | HRU 16 overland flow Manning's 'n'     |
| <i>ov_n_17</i> | multiplier | 0.850       | 1.150       | HRU 17 overland flow Manning's 'n'     |
| <i>ov_n_18</i> | multiplier | 0.850       | 1.150       | HRU 18 overland flow Manning's 'n'     |
| <i>ov_n_19</i> | multiplier | 0.850       | 1.150       | HRU 19 overland flow Manning's 'n'     |
| <i>ov_n_20</i> | multiplier | 0.850       | 1.150       | HRU 20 overland flow Manning's 'n'     |
| <i>ov_n_21</i> | multiplier | 0.850       | 1.150       | HRU 21 overland flow Manning's 'n'     |
| <i>ov_n_22</i> | multiplier | 0.850       | 1.150       | HRU 22 overland flow Manning's 'n'     |
| <i>ov_n_23</i> | multiplier | 0.850       | 1.150       | HRU 23 overland flow Manning's 'n'     |
| <i>ov_n_24</i> | multiplier | 0.850       | 1.150       | HRU 24 overland flow Manning's 'n'     |
| <i>ov_n_25</i> | multiplier | 0.850       | 1.150       | HRU 25 overland flow Manning's 'n'     |
| <i>ov_n_26</i> | multiplier | 0.850       | 1.150       | HRU 26 overland flow Manning's 'n'     |
| <i>ov_n_27</i> | multiplier | 0.850       | 1.150       | HRU 27 overland flow Manning's 'n'     |
| <i>ov_n_28</i> | multiplier | 0.850       | 1.150       | HRU 28 overland flow Manning's 'n'     |
| <i>ov_n_29</i> | multiplier | 0.850       | 1.150       | HRU 29 overland flow Manning's 'n'     |
| <i>ov_n_30</i> | multiplier | 0.850       | 1.150       | HRU 30 overland flow Manning's 'n'     |
| <i>ov_n_31</i> | multiplier | 0.850       | 1.150       | HRU 31 overland flow Manning's 'n'     |
| <i>ov_n_32</i> | multiplier | 0.850       | 1.150       | HRU 32 overland flow Manning's 'n'     |
| <i>ov_n_33</i> | multiplier | 0.850       | 1.150       | HRU 33 overland flow Manning's 'n'     |
| <i>ov_n_34</i> | multiplier | 0.850       | 1.150       | HRU 34 overland flow Manning's 'n'     |
| <i>ov_n_35</i> | multiplier | 0.850       | 1.150       | HRU 35 overland flow Manning's 'n'     |
| <i>ov_n_36</i> | multiplier | 0.850       | 1.150       | HRU 36 overland flow Manning's 'n'     |
| <i>ov_n_37</i> | multiplier | 0.850       | 1.150       | HRU 37 overland flow Manning's 'n'     |
| <i>ov_n_38</i> | multiplier | 0.850       | 1.150       | HRU 38 overland flow Manning's 'n'     |
| <i>ov_n_39</i> | multiplier | 0.850       | 1.150       | HRU 39 overland flow Manning's 'n'     |
| <i>ov_n_40</i> | multiplier | 0.850       | 1.150       | HRU 40 overland flow Manning's 'n'     |
| <i>ov_n_41</i> | multiplier | 0.850       | 1.150       | HRU 41 overland flow Manning's 'n'     |
| <i>ov_n_42</i> | multiplier | 0.850       | 1.150       | HRU 42 overland flow Manning's 'n'     |
| <i>ov_n_43</i> | multiplier | 0.850       | 1.150       | HRU 43 overland flow Manning's 'n'     |
| <i>ov_n_44</i> | multiplier | 0.850       | 1.150       | HRU 44 overland flow Manning's 'n'     |

Continued on next page

| Parameter         | Type       | Lower Bound | Upper Bound | Description (with units if applicable)      |
|-------------------|------------|-------------|-------------|---------------------------------------------|
| <i>ov-n_45</i>    | multiplier | 0.850       | 1.150       | HRU 45 overland flow Manning's 'n'          |
| <i>ov-n_46</i>    | multiplier | 0.850       | 1.150       | HRU 46 overland flow Manning's 'n'          |
| <i>ov-n_47</i>    | multiplier | 0.850       | 1.150       | HRU 47 overland flow Manning's 'n'          |
| <i>ov-n_r</i>     | multiplier | 0.500       | 1.500       | subbasin overland flow Manning's 'n'        |
| <i>pcp_0_2001</i> | multiplier | 0.800       | 1.200       | subbasin 2001 0th to 25th quantile precip   |
| <i>pcp_0_2002</i> | multiplier | 0.800       | 1.200       | subbasin 2002 0th to 25th quantile precip   |
| <i>pcp_0_2003</i> | multiplier | 0.800       | 1.200       | subbasin 2003 0th to 25th quantile precip   |
| <i>pcp_0_2004</i> | multiplier | 0.800       | 1.200       | subbasin 2004 0th to 25th quantile precip   |
| <i>pcp_0_2005</i> | multiplier | 0.800       | 1.200       | subbasin 2005 0th to 25th quantile precip   |
| <i>pcp_0_2006</i> | multiplier | 0.800       | 1.200       | subbasin 2006 0th to 25th quantile precip   |
| <i>pcp_0_2007</i> | multiplier | 0.800       | 1.200       | subbasin 2007 0th to 25th quantile precip   |
| <i>pcp_0_2008</i> | multiplier | 0.800       | 1.200       | subbasin 2008 0th to 25th quantile precip   |
| <i>pcp_0_2009</i> | multiplier | 0.800       | 1.200       | subbasin 2009 0th to 25th quantile precip   |
| <i>pcp_0_2010</i> | multiplier | 0.800       | 1.200       | subbasin 2010 0th to 25th quantile precip   |
| <i>pcp_1_2001</i> | multiplier | 0.800       | 1.200       | subbasin 2001 25th to 50th quantile precip  |
| <i>pcp_1_2002</i> | multiplier | 0.800       | 1.200       | subbasin 2002 25th to 50th quantile precip  |
| <i>pcp_1_2003</i> | multiplier | 0.800       | 1.200       | subbasin 2003 25th to 50th quantile precip  |
| <i>pcp_1_2004</i> | multiplier | 0.800       | 1.200       | subbasin 2004 25th to 50th quantile precip  |
| <i>pcp_1_2005</i> | multiplier | 0.800       | 1.200       | subbasin 2005 25th to 50th quantile precip  |
| <i>pcp_1_2006</i> | multiplier | 0.800       | 1.200       | subbasin 2006 25th to 50th quantile precip  |
| <i>pcp_1_2007</i> | multiplier | 0.800       | 1.200       | subbasin 2007 25th to 50th quantile precip  |
| <i>pcp_1_2008</i> | multiplier | 0.800       | 1.200       | subbasin 2008 25th to 50th quantile precip  |
| <i>pcp_1_2009</i> | multiplier | 0.800       | 1.200       | subbasin 2009 25th to 50th quantile precip  |
| <i>pcp_1_2010</i> | multiplier | 0.800       | 1.200       | subbasin 2010 25th to 50th quantile precip  |
| <i>pcp_2_2001</i> | multiplier | 0.800       | 1.200       | subbasin 2001 50th to 75th quantile precip  |
| <i>pcp_2_2002</i> | multiplier | 0.800       | 1.200       | subbasin 2002 50th to 75th quantile precip  |
| <i>pcp_2_2003</i> | multiplier | 0.800       | 1.200       | subbasin 2003 50th to 75th quantile precip  |
| <i>pcp_2_2004</i> | multiplier | 0.800       | 1.200       | subbasin 2004 50th to 75th quantile precip  |
| <i>pcp_2_2005</i> | multiplier | 0.800       | 1.200       | subbasin 2005 50th to 75th quantile precip  |
| <i>pcp_2_2006</i> | multiplier | 0.800       | 1.200       | subbasin 2006 50th to 75th quantile precip  |
| <i>pcp_2_2007</i> | multiplier | 0.800       | 1.200       | subbasin 2007 50th to 75th quantile precip  |
| <i>pcp_2_2008</i> | multiplier | 0.800       | 1.200       | subbasin 2008 50th to 75th quantile precip  |
| <i>pcp_2_2009</i> | multiplier | 0.800       | 1.200       | subbasin 2009 50th to 75th quantile precip  |
| <i>pcp_2_2010</i> | multiplier | 0.800       | 1.200       | subbasin 2010 50th to 75th quantile precip  |
| <i>pcp_3_2001</i> | multiplier | 0.800       | 1.200       | subbasin 2001 75th to 100th quantile precip |
| <i>pcp_3_2002</i> | multiplier | 0.800       | 1.200       | subbasin 2002 75th to 100th quantile precip |
| <i>pcp_3_2003</i> | multiplier | 0.800       | 1.200       | subbasin 2003 75th to 100th quantile precip |
| <i>pcp_3_2004</i> | multiplier | 0.800       | 1.200       | subbasin 2004 75th to 100th quantile precip |
| <i>pcp_3_2005</i> | multiplier | 0.800       | 1.200       | subbasin 2005 75th to 100th quantile precip |
| <i>pcp_3_2006</i> | multiplier | 0.800       | 1.200       | subbasin 2006 75th to 100th quantile precip |
| <i>pcp_3_2007</i> | multiplier | 0.800       | 1.200       | subbasin 2007 75th to 100th quantile precip |

Continued on next page

| Parameter          | Type       | Lower Bound | Upper Bound | Description (with units if applicable)      |
|--------------------|------------|-------------|-------------|---------------------------------------------|
| <i>pcp_3_2008</i>  | multiplier | 0.800       | 1.200       | subbasin 2008 75th to 100th quantile precip |
| <i>pcp_3_2009</i>  | multiplier | 0.800       | 1.200       | subbasin 2009 75th to 100th quantile precip |
| <i>pcp_3_2010</i>  | multiplier | 0.800       | 1.200       | subbasin 2010 75th to 100th quantile precip |
| <i>rchrq_dp_01</i> | multiplier | 0.850       | 1.150       | HRU 01 deep aquifer percolation factor      |
| <i>rchrq_dp_02</i> | multiplier | 0.850       | 1.150       | HRU 02 deep aquifer percolation factor      |
| <i>rchrq_dp_03</i> | multiplier | 0.850       | 1.150       | HRU 03 deep aquifer percolation factor      |
| <i>rchrq_dp_04</i> | multiplier | 0.850       | 1.150       | HRU 04 deep aquifer percolation factor      |
| <i>rchrq_dp_05</i> | multiplier | 0.850       | 1.150       | HRU 05 deep aquifer percolation factor      |
| <i>rchrq_dp_06</i> | multiplier | 0.850       | 1.150       | HRU 06 deep aquifer percolation factor      |
| <i>rchrq_dp_07</i> | multiplier | 0.850       | 1.150       | HRU 07 deep aquifer percolation factor      |
| <i>rchrq_dp_08</i> | multiplier | 0.850       | 1.150       | HRU 08 deep aquifer percolation factor      |
| <i>rchrq_dp_09</i> | multiplier | 0.850       | 1.150       | HRU 09 deep aquifer percolation factor      |
| <i>rchrq_dp_10</i> | multiplier | 0.850       | 1.150       | HRU 10 deep aquifer percolation factor      |
| <i>rchrq_dp_11</i> | multiplier | 0.850       | 1.150       | HRU 11 deep aquifer percolation factor      |
| <i>rchrq_dp_12</i> | multiplier | 0.850       | 1.150       | HRU 12 deep aquifer percolation factor      |
| <i>rchrq_dp_13</i> | multiplier | 0.850       | 1.150       | HRU 13 deep aquifer percolation factor      |
| <i>rchrq_dp_14</i> | multiplier | 0.850       | 1.150       | HRU 14 deep aquifer percolation factor      |
| <i>rchrq_dp_15</i> | multiplier | 0.850       | 1.150       | HRU 15 deep aquifer percolation factor      |
| <i>rchrq_dp_16</i> | multiplier | 0.850       | 1.150       | HRU 16 deep aquifer percolation factor      |
| <i>rchrq_dp_17</i> | multiplier | 0.850       | 1.150       | HRU 17 deep aquifer percolation factor      |
| <i>rchrq_dp_18</i> | multiplier | 0.850       | 1.150       | HRU 18 deep aquifer percolation factor      |
| <i>rchrq_dp_19</i> | multiplier | 0.850       | 1.150       | HRU 19 deep aquifer percolation factor      |
| <i>rchrq_dp_20</i> | multiplier | 0.850       | 1.150       | HRU 20 deep aquifer percolation factor      |
| <i>rchrq_dp_21</i> | multiplier | 0.850       | 1.150       | HRU 21 deep aquifer percolation factor      |
| <i>rchrq_dp_22</i> | multiplier | 0.850       | 1.150       | HRU 22 deep aquifer percolation factor      |
| <i>rchrq_dp_23</i> | multiplier | 0.850       | 1.150       | HRU 23 deep aquifer percolation factor      |
| <i>rchrq_dp_24</i> | multiplier | 0.850       | 1.150       | HRU 24 deep aquifer percolation factor      |
| <i>rchrq_dp_25</i> | multiplier | 0.850       | 1.150       | HRU 25 deep aquifer percolation factor      |
| <i>rchrq_dp_26</i> | multiplier | 0.850       | 1.150       | HRU 26 deep aquifer percolation factor      |
| <i>rchrq_dp_27</i> | multiplier | 0.850       | 1.150       | HRU 27 deep aquifer percolation factor      |
| <i>rchrq_dp_28</i> | multiplier | 0.850       | 1.150       | HRU 28 deep aquifer percolation factor      |
| <i>rchrq_dp_29</i> | multiplier | 0.850       | 1.150       | HRU 29 deep aquifer percolation factor      |
| <i>rchrq_dp_30</i> | multiplier | 0.850       | 1.150       | HRU 30 deep aquifer percolation factor      |
| <i>rchrq_dp_31</i> | multiplier | 0.850       | 1.150       | HRU 31 deep aquifer percolation factor      |
| <i>rchrq_dp_32</i> | multiplier | 0.850       | 1.150       | HRU 32 deep aquifer percolation factor      |
| <i>rchrq_dp_33</i> | multiplier | 0.850       | 1.150       | HRU 33 deep aquifer percolation factor      |
| <i>rchrq_dp_34</i> | multiplier | 0.850       | 1.150       | HRU 34 deep aquifer percolation factor      |
| <i>rchrq_dp_35</i> | multiplier | 0.850       | 1.150       | HRU 35 deep aquifer percolation factor      |
| <i>rchrq_dp_36</i> | multiplier | 0.850       | 1.150       | HRU 36 deep aquifer percolation factor      |
| <i>rchrq_dp_37</i> | multiplier | 0.850       | 1.150       | HRU 37 deep aquifer percolation factor      |
| <i>rchrq_dp_38</i> | multiplier | 0.850       | 1.150       | HRU 38 deep aquifer percolation factor      |

Continued on next page

| Parameter          | Type       | Lower Bound | Upper Bound | Description (with units if applicable)          |
|--------------------|------------|-------------|-------------|-------------------------------------------------|
| <i>rchrq-dp-39</i> | multiplier | 0.850       | 1.150       | HRU 39 deep aquifer percolation factor          |
| <i>rchrq-dp-40</i> | multiplier | 0.850       | 1.150       | HRU 40 deep aquifer percolation factor          |
| <i>rchrq-dp-41</i> | multiplier | 0.850       | 1.150       | HRU 41 deep aquifer percolation factor          |
| <i>rchrq-dp-42</i> | multiplier | 0.850       | 1.150       | HRU 42 deep aquifer percolation factor          |
| <i>rchrq-dp-43</i> | multiplier | 0.850       | 1.150       | HRU 43 deep aquifer percolation factor          |
| <i>rchrq-dp-44</i> | multiplier | 0.850       | 1.150       | HRU 44 deep aquifer percolation factor          |
| <i>rchrq-dp-45</i> | multiplier | 0.850       | 1.150       | HRU 45 deep aquifer percolation factor          |
| <i>rchrq-dp-46</i> | multiplier | 0.850       | 1.150       | HRU 46 deep aquifer percolation factor          |
| <i>rchrq-dp-47</i> | multiplier | 0.850       | 1.150       | HRU 47 deep aquifer percolation factor          |
| <i>rchrq-dp-v</i>  | value      | 0.250       | 0.750       | subbasin deep aquifer percolation factor        |
| <i>revapmn-01</i>  | multiplier | 0.850       | 1.150       | HRU 01 groundwater threshold 'revap' depth (mm) |
| <i>revapmn-02</i>  | multiplier | 0.850       | 1.150       | HRU 02 groundwater threshold 'revap' depth (mm) |
| <i>revapmn-03</i>  | multiplier | 0.850       | 1.150       | HRU 03 groundwater threshold 'revap' depth (mm) |
| <i>revapmn-04</i>  | multiplier | 0.850       | 1.150       | HRU 04 groundwater threshold 'revap' depth (mm) |
| <i>revapmn-05</i>  | multiplier | 0.850       | 1.150       | HRU 05 groundwater threshold 'revap' depth (mm) |
| <i>revapmn-06</i>  | multiplier | 0.850       | 1.150       | HRU 06 groundwater threshold 'revap' depth (mm) |
| <i>revapmn-07</i>  | multiplier | 0.850       | 1.150       | HRU 07 groundwater threshold 'revap' depth (mm) |
| <i>revapmn-08</i>  | multiplier | 0.850       | 1.150       | HRU 08 groundwater threshold 'revap' depth (mm) |
| <i>revapmn-09</i>  | multiplier | 0.850       | 1.150       | HRU 09 groundwater threshold 'revap' depth (mm) |
| <i>revapmn-10</i>  | multiplier | 0.850       | 1.150       | HRU 10 groundwater threshold 'revap' depth (mm) |
| <i>revapmn-11</i>  | multiplier | 0.850       | 1.150       | HRU 11 groundwater threshold 'revap' depth (mm) |
| <i>revapmn-12</i>  | multiplier | 0.850       | 1.150       | HRU 12 groundwater threshold 'revap' depth (mm) |
| <i>revapmn-13</i>  | multiplier | 0.850       | 1.150       | HRU 13 groundwater threshold 'revap' depth (mm) |
| <i>revapmn-14</i>  | multiplier | 0.850       | 1.150       | HRU 14 groundwater threshold 'revap' depth (mm) |
| <i>revapmn-15</i>  | multiplier | 0.850       | 1.150       | HRU 15 groundwater threshold 'revap' depth (mm) |
| <i>revapmn-16</i>  | multiplier | 0.850       | 1.150       | HRU 16 groundwater threshold 'revap' depth (mm) |
| <i>revapmn-17</i>  | multiplier | 0.850       | 1.150       | HRU 17 groundwater threshold 'revap' depth (mm) |
| <i>revapmn-18</i>  | multiplier | 0.850       | 1.150       | HRU 18 groundwater threshold 'revap' depth (mm) |
| <i>revapmn-19</i>  | multiplier | 0.850       | 1.150       | HRU 19 groundwater threshold 'revap' depth (mm) |
| <i>revapmn-20</i>  | multiplier | 0.850       | 1.150       | HRU 20 groundwater threshold 'revap' depth (mm) |
| <i>revapmn-21</i>  | multiplier | 0.850       | 1.150       | HRU 21 groundwater threshold 'revap' depth (mm) |
| <i>revapmn-22</i>  | multiplier | 0.850       | 1.150       | HRU 22 groundwater threshold 'revap' depth (mm) |
| <i>revapmn-23</i>  | multiplier | 0.850       | 1.150       | HRU 23 groundwater threshold 'revap' depth (mm) |
| <i>revapmn-24</i>  | multiplier | 0.850       | 1.150       | HRU 24 groundwater threshold 'revap' depth (mm) |
| <i>revapmn-25</i>  | multiplier | 0.850       | 1.150       | HRU 25 groundwater threshold 'revap' depth (mm) |
| <i>revapmn-26</i>  | multiplier | 0.850       | 1.150       | HRU 26 groundwater threshold 'revap' depth (mm) |
| <i>revapmn-27</i>  | multiplier | 0.850       | 1.150       | HRU 27 groundwater threshold 'revap' depth (mm) |
| <i>revapmn-28</i>  | multiplier | 0.850       | 1.150       | HRU 28 groundwater threshold 'revap' depth (mm) |
| <i>revapmn-29</i>  | multiplier | 0.850       | 1.150       | HRU 29 groundwater threshold 'revap' depth (mm) |
| <i>revapmn-30</i>  | multiplier | 0.850       | 1.150       | HRU 30 groundwater threshold 'revap' depth (mm) |
| <i>revapmn-31</i>  | multiplier | 0.850       | 1.150       | HRU 31 groundwater threshold 'revap' depth (mm) |

Continued on next page



| Parameter          | Type       | Lower Bound | Upper Bound | Description (with units if applicable)            |
|--------------------|------------|-------------|-------------|---------------------------------------------------|
| <i>revapmn_32</i>  | multiplier | 0.850       | 1.150       | HRU 32 groundwater threshold 'revap' depth (mm)   |
| <i>revapmn_33</i>  | multiplier | 0.850       | 1.150       | HRU 33 groundwater threshold 'revap' depth (mm)   |
| <i>revapmn_34</i>  | multiplier | 0.850       | 1.150       | HRU 34 groundwater threshold 'revap' depth (mm)   |
| <i>revapmn_35</i>  | multiplier | 0.850       | 1.150       | HRU 35 groundwater threshold 'revap' depth (mm)   |
| <i>revapmn_36</i>  | multiplier | 0.850       | 1.150       | HRU 36 groundwater threshold 'revap' depth (mm)   |
| <i>revapmn_37</i>  | multiplier | 0.850       | 1.150       | HRU 37 groundwater threshold 'revap' depth (mm)   |
| <i>revapmn_38</i>  | multiplier | 0.850       | 1.150       | HRU 38 groundwater threshold 'revap' depth (mm)   |
| <i>revapmn_39</i>  | multiplier | 0.850       | 1.150       | HRU 39 groundwater threshold 'revap' depth (mm)   |
| <i>revapmn_40</i>  | multiplier | 0.850       | 1.150       | HRU 40 groundwater threshold 'revap' depth (mm)   |
| <i>revapmn_41</i>  | multiplier | 0.850       | 1.150       | HRU 41 groundwater threshold 'revap' depth (mm)   |
| <i>revapmn_42</i>  | multiplier | 0.850       | 1.150       | HRU 42 groundwater threshold 'revap' depth (mm)   |
| <i>revapmn_43</i>  | multiplier | 0.850       | 1.150       | HRU 43 groundwater threshold 'revap' depth (mm)   |
| <i>revapmn_44</i>  | multiplier | 0.850       | 1.150       | HRU 44 groundwater threshold 'revap' depth (mm)   |
| <i>revapmn_45</i>  | multiplier | 0.850       | 1.150       | HRU 45 groundwater threshold 'revap' depth (mm)   |
| <i>revapmn_46</i>  | multiplier | 0.850       | 1.150       | HRU 46 groundwater threshold 'revap' depth (mm)   |
| <i>revapmn_47</i>  | multiplier | 0.850       | 1.150       | HRU 47 groundwater threshold 'revap' depth (mm)   |
| <i>revapmn_v</i>   | value      | 100.000     | 1000.000    | subbasin groundwater threshold 'revap' depth (mm) |
| <i>sbsubbsn_01</i> | multiplier | 0.850       | 1.150       | HRU 01 average slope length (m)                   |
| <i>sbsubbsn_02</i> | multiplier | 0.850       | 1.150       | HRU 02 average slope length (m)                   |
| <i>sbsubbsn_03</i> | multiplier | 0.850       | 1.150       | HRU 03 average slope length (m)                   |
| <i>sbsubbsn_04</i> | multiplier | 0.850       | 1.150       | HRU 04 average slope length (m)                   |
| <i>sbsubbsn_05</i> | multiplier | 0.850       | 1.150       | HRU 05 average slope length (m)                   |
| <i>sbsubbsn_06</i> | multiplier | 0.850       | 1.150       | HRU 06 average slope length (m)                   |
| <i>sbsubbsn_07</i> | multiplier | 0.850       | 1.150       | HRU 07 average slope length (m)                   |
| <i>sbsubbsn_08</i> | multiplier | 0.850       | 1.150       | HRU 08 average slope length (m)                   |
| <i>sbsubbsn_09</i> | multiplier | 0.850       | 1.150       | HRU 09 average slope length (m)                   |
| <i>sbsubbsn_10</i> | multiplier | 0.850       | 1.150       | HRU 10 average slope length (m)                   |
| <i>sbsubbsn_11</i> | multiplier | 0.850       | 1.150       | HRU 11 average slope length (m)                   |
| <i>sbsubbsn_12</i> | multiplier | 0.850       | 1.150       | HRU 12 average slope length (m)                   |
| <i>sbsubbsn_13</i> | multiplier | 0.850       | 1.150       | HRU 13 average slope length (m)                   |
| <i>sbsubbsn_14</i> | multiplier | 0.850       | 1.150       | HRU 14 average slope length (m)                   |
| <i>sbsubbsn_15</i> | multiplier | 0.850       | 1.150       | HRU 15 average slope length (m)                   |
| <i>sbsubbsn_16</i> | multiplier | 0.850       | 1.150       | HRU 16 average slope length (m)                   |
| <i>sbsubbsn_17</i> | multiplier | 0.850       | 1.150       | HRU 17 average slope length (m)                   |
| <i>sbsubbsn_18</i> | multiplier | 0.850       | 1.150       | HRU 18 average slope length (m)                   |
| <i>sbsubbsn_19</i> | multiplier | 0.850       | 1.150       | HRU 19 average slope length (m)                   |
| <i>sbsubbsn_20</i> | multiplier | 0.850       | 1.150       | HRU 20 average slope length (m)                   |
| <i>sbsubbsn_21</i> | multiplier | 0.850       | 1.150       | HRU 21 average slope length (m)                   |
| <i>sbsubbsn_22</i> | multiplier | 0.850       | 1.150       | HRU 22 average slope length (m)                   |
| <i>sbsubbsn_23</i> | multiplier | 0.850       | 1.150       | HRU 23 average slope length (m)                   |
| <i>sbsubbsn_24</i> | multiplier | 0.850       | 1.150       | HRU 24 average slope length (m)                   |

Continued on next page

| Parameter           | Type       | Lower Bound | Upper Bound | Description (with units if applicable) |
|---------------------|------------|-------------|-------------|----------------------------------------|
| <i>slsubbsn_25</i>  | multiplier | 0.850       | 1.150       | HRU 25 average slope length (m)        |
| <i>slsubbsn_26</i>  | multiplier | 0.850       | 1.150       | HRU 26 average slope length (m)        |
| <i>slsubbsn_27</i>  | multiplier | 0.850       | 1.150       | HRU 27 average slope length (m)        |
| <i>slsubbsn_28</i>  | multiplier | 0.850       | 1.150       | HRU 28 average slope length (m)        |
| <i>slsubbsn_29</i>  | multiplier | 0.850       | 1.150       | HRU 29 average slope length (m)        |
| <i>slsubbsn_30</i>  | multiplier | 0.850       | 1.150       | HRU 30 average slope length (m)        |
| <i>slsubbsn_31</i>  | multiplier | 0.850       | 1.150       | HRU 31 average slope length (m)        |
| <i>slsubbsn_32</i>  | multiplier | 0.850       | 1.150       | HRU 32 average slope length (m)        |
| <i>slsubbsn_33</i>  | multiplier | 0.850       | 1.150       | HRU 33 average slope length (m)        |
| <i>slsubbsn_34</i>  | multiplier | 0.850       | 1.150       | HRU 34 average slope length (m)        |
| <i>slsubbsn_35</i>  | multiplier | 0.850       | 1.150       | HRU 35 average slope length (m)        |
| <i>slsubbsn_36</i>  | multiplier | 0.850       | 1.150       | HRU 36 average slope length (m)        |
| <i>slsubbsn_37</i>  | multiplier | 0.850       | 1.150       | HRU 37 average slope length (m)        |
| <i>slsubbsn_38</i>  | multiplier | 0.850       | 1.150       | HRU 38 average slope length (m)        |
| <i>slsubbsn_39</i>  | multiplier | 0.850       | 1.150       | HRU 39 average slope length (m)        |
| <i>slsubbsn_40</i>  | multiplier | 0.850       | 1.150       | HRU 40 average slope length (m)        |
| <i>slsubbsn_41</i>  | multiplier | 0.850       | 1.150       | HRU 41 average slope length (m)        |
| <i>slsubbsn_42</i>  | multiplier | 0.850       | 1.150       | HRU 42 average slope length (m)        |
| <i>slsubbsn_43</i>  | multiplier | 0.850       | 1.150       | HRU 43 average slope length (m)        |
| <i>slsubbsn_44</i>  | multiplier | 0.850       | 1.150       | HRU 44 average slope length (m)        |
| <i>slsubbsn_45</i>  | multiplier | 0.850       | 1.150       | HRU 45 average slope length (m)        |
| <i>slsubbsn_46</i>  | multiplier | 0.850       | 1.150       | HRU 46 average slope length (m)        |
| <i>slsubbsn_47</i>  | multiplier | 0.850       | 1.150       | HRU 47 average slope length (m)        |
| <i>slsubbsn_r</i>   | multiplier | 0.500       | 1.500       | subbasin average slope length (m)      |
| <i>sol_alb_1_01</i> | multiplier | 0.850       | 1.150       | HRU 01 soil layer 1 moist albedo       |
| <i>sol_alb_1_02</i> | multiplier | 0.850       | 1.150       | HRU 02 soil layer 1 moist albedo       |
| <i>sol_alb_1_03</i> | multiplier | 0.850       | 1.150       | HRU 03 soil layer 1 moist albedo       |
| <i>sol_alb_1_04</i> | multiplier | 0.850       | 1.150       | HRU 04 soil layer 1 moist albedo       |
| <i>sol_alb_1_05</i> | multiplier | 0.850       | 1.150       | HRU 05 soil layer 1 moist albedo       |
| <i>sol_alb_1_06</i> | multiplier | 0.850       | 1.150       | HRU 06 soil layer 1 moist albedo       |
| <i>sol_alb_1_07</i> | multiplier | 0.850       | 1.150       | HRU 07 soil layer 1 moist albedo       |
| <i>sol_alb_1_08</i> | multiplier | 0.850       | 1.150       | HRU 08 soil layer 1 moist albedo       |
| <i>sol_alb_1_09</i> | multiplier | 0.850       | 1.150       | HRU 09 soil layer 1 moist albedo       |
| <i>sol_alb_1_10</i> | multiplier | 0.850       | 1.150       | HRU 10 soil layer 1 moist albedo       |
| <i>sol_alb_1_11</i> | multiplier | 0.850       | 1.150       | HRU 11 soil layer 1 moist albedo       |
| <i>sol_alb_1_12</i> | multiplier | 0.850       | 1.150       | HRU 12 soil layer 1 moist albedo       |
| <i>sol_alb_1_13</i> | multiplier | 0.850       | 1.150       | HRU 13 soil layer 1 moist albedo       |
| <i>sol_alb_1_14</i> | multiplier | 0.850       | 1.150       | HRU 14 soil layer 1 moist albedo       |
| <i>sol_alb_1_15</i> | multiplier | 0.850       | 1.150       | HRU 15 soil layer 1 moist albedo       |
| <i>sol_alb_1_16</i> | multiplier | 0.850       | 1.150       | HRU 16 soil layer 1 moist albedo       |
| <i>sol_alb_1_17</i> | multiplier | 0.850       | 1.150       | HRU 17 soil layer 1 moist albedo       |

Continued on next page

| Parameter           | Type       | Lower Bound | Upper Bound | Description (with units if applicable) |
|---------------------|------------|-------------|-------------|----------------------------------------|
| <i>sol_alb_1_18</i> | multiplier | 0.850       | 1.150       | HRU 18 soil layer 1 moist albedo       |
| <i>sol_alb_1_19</i> | multiplier | 0.850       | 1.150       | HRU 19 soil layer 1 moist albedo       |
| <i>sol_alb_1_20</i> | multiplier | 0.850       | 1.150       | HRU 20 soil layer 1 moist albedo       |
| <i>sol_alb_1_21</i> | multiplier | 0.850       | 1.150       | HRU 21 soil layer 1 moist albedo       |
| <i>sol_alb_1_22</i> | multiplier | 0.850       | 1.150       | HRU 22 soil layer 1 moist albedo       |
| <i>sol_alb_1_23</i> | multiplier | 0.850       | 1.150       | HRU 23 soil layer 1 moist albedo       |
| <i>sol_alb_1_24</i> | multiplier | 0.850       | 1.150       | HRU 24 soil layer 1 moist albedo       |
| <i>sol_alb_1_25</i> | multiplier | 0.850       | 1.150       | HRU 25 soil layer 1 moist albedo       |
| <i>sol_alb_1_26</i> | multiplier | 0.850       | 1.150       | HRU 26 soil layer 1 moist albedo       |
| <i>sol_alb_1_27</i> | multiplier | 0.850       | 1.150       | HRU 27 soil layer 1 moist albedo       |
| <i>sol_alb_1_28</i> | multiplier | 0.850       | 1.150       | HRU 28 soil layer 1 moist albedo       |
| <i>sol_alb_1_29</i> | multiplier | 0.850       | 1.150       | HRU 29 soil layer 1 moist albedo       |
| <i>sol_alb_1_30</i> | multiplier | 0.850       | 1.150       | HRU 30 soil layer 1 moist albedo       |
| <i>sol_alb_1_31</i> | multiplier | 0.850       | 1.150       | HRU 31 soil layer 1 moist albedo       |
| <i>sol_alb_1_32</i> | multiplier | 0.850       | 1.150       | HRU 32 soil layer 1 moist albedo       |
| <i>sol_alb_1_33</i> | multiplier | 0.850       | 1.150       | HRU 33 soil layer 1 moist albedo       |
| <i>sol_alb_1_34</i> | multiplier | 0.850       | 1.150       | HRU 34 soil layer 1 moist albedo       |
| <i>sol_alb_1_35</i> | multiplier | 0.850       | 1.150       | HRU 35 soil layer 1 moist albedo       |
| <i>sol_alb_1_36</i> | multiplier | 0.850       | 1.150       | HRU 36 soil layer 1 moist albedo       |
| <i>sol_alb_1_37</i> | multiplier | 0.850       | 1.150       | HRU 37 soil layer 1 moist albedo       |
| <i>sol_alb_1_38</i> | multiplier | 0.850       | 1.150       | HRU 38 soil layer 1 moist albedo       |
| <i>sol_alb_1_39</i> | multiplier | 0.850       | 1.150       | HRU 39 soil layer 1 moist albedo       |
| <i>sol_alb_1_40</i> | multiplier | 0.850       | 1.150       | HRU 40 soil layer 1 moist albedo       |
| <i>sol_alb_1_41</i> | multiplier | 0.850       | 1.150       | HRU 41 soil layer 1 moist albedo       |
| <i>sol_alb_1_42</i> | multiplier | 0.850       | 1.150       | HRU 42 soil layer 1 moist albedo       |
| <i>sol_alb_1_43</i> | multiplier | 0.850       | 1.150       | HRU 43 soil layer 1 moist albedo       |
| <i>sol_alb_1_44</i> | multiplier | 0.850       | 1.150       | HRU 44 soil layer 1 moist albedo       |
| <i>sol_alb_1_45</i> | multiplier | 0.850       | 1.150       | HRU 45 soil layer 1 moist albedo       |
| <i>sol_alb_1_46</i> | multiplier | 0.850       | 1.150       | HRU 46 soil layer 1 moist albedo       |
| <i>sol_alb_1_47</i> | multiplier | 0.850       | 1.150       | HRU 47 soil layer 1 moist albedo       |
| <i>sol_alb_1_r</i>  | multiplier | 1.000       | 5.000       | subbasin soil layer 1 moist albedo     |
| <i>sol_alb_2_01</i> | multiplier | 0.850       | 1.150       | HRU 01 soil layer 2 moist albedo       |
| <i>sol_alb_2_02</i> | multiplier | 0.850       | 1.150       | HRU 02 soil layer 2 moist albedo       |
| <i>sol_alb_2_03</i> | multiplier | 0.850       | 1.150       | HRU 03 soil layer 2 moist albedo       |
| <i>sol_alb_2_04</i> | multiplier | 0.850       | 1.150       | HRU 04 soil layer 2 moist albedo       |
| <i>sol_alb_2_05</i> | multiplier | 0.850       | 1.150       | HRU 05 soil layer 2 moist albedo       |
| <i>sol_alb_2_06</i> | multiplier | 0.850       | 1.150       | HRU 06 soil layer 2 moist albedo       |
| <i>sol_alb_2_07</i> | multiplier | 0.850       | 1.150       | HRU 07 soil layer 2 moist albedo       |
| <i>sol_alb_2_08</i> | multiplier | 0.850       | 1.150       | HRU 08 soil layer 2 moist albedo       |
| <i>sol_alb_2_09</i> | multiplier | 0.850       | 1.150       | HRU 09 soil layer 2 moist albedo       |
| <i>sol_alb_2_10</i> | multiplier | 0.850       | 1.150       | HRU 10 soil layer 2 moist albedo       |

Continued on next page

| Parameter           | Type       | Lower Bound | Upper Bound | Description (with units if applicable) |
|---------------------|------------|-------------|-------------|----------------------------------------|
| <i>sol_alb_2_11</i> | multiplier | 0.850       | 1.150       | HRU 11 soil layer 2 moist albedo       |
| <i>sol_alb_2_12</i> | multiplier | 0.850       | 1.150       | HRU 12 soil layer 2 moist albedo       |
| <i>sol_alb_2_13</i> | multiplier | 0.850       | 1.150       | HRU 13 soil layer 2 moist albedo       |
| <i>sol_alb_2_14</i> | multiplier | 0.850       | 1.150       | HRU 14 soil layer 2 moist albedo       |
| <i>sol_alb_2_15</i> | multiplier | 0.850       | 1.150       | HRU 15 soil layer 2 moist albedo       |
| <i>sol_alb_2_16</i> | multiplier | 0.850       | 1.150       | HRU 16 soil layer 2 moist albedo       |
| <i>sol_alb_2_17</i> | multiplier | 0.850       | 1.150       | HRU 17 soil layer 2 moist albedo       |
| <i>sol_alb_2_18</i> | multiplier | 0.850       | 1.150       | HRU 18 soil layer 2 moist albedo       |
| <i>sol_alb_2_19</i> | multiplier | 0.850       | 1.150       | HRU 19 soil layer 2 moist albedo       |
| <i>sol_alb_2_20</i> | multiplier | 0.850       | 1.150       | HRU 20 soil layer 2 moist albedo       |
| <i>sol_alb_2_21</i> | multiplier | 0.850       | 1.150       | HRU 21 soil layer 2 moist albedo       |
| <i>sol_alb_2_22</i> | multiplier | 0.850       | 1.150       | HRU 22 soil layer 2 moist albedo       |
| <i>sol_alb_2_23</i> | multiplier | 0.850       | 1.150       | HRU 23 soil layer 2 moist albedo       |
| <i>sol_alb_2_24</i> | multiplier | 0.850       | 1.150       | HRU 24 soil layer 2 moist albedo       |
| <i>sol_alb_2_25</i> | multiplier | 0.850       | 1.150       | HRU 25 soil layer 2 moist albedo       |
| <i>sol_alb_2_26</i> | multiplier | 0.850       | 1.150       | HRU 26 soil layer 2 moist albedo       |
| <i>sol_alb_2_27</i> | multiplier | 0.850       | 1.150       | HRU 27 soil layer 2 moist albedo       |
| <i>sol_alb_2_28</i> | multiplier | 0.850       | 1.150       | HRU 28 soil layer 2 moist albedo       |
| <i>sol_alb_2_29</i> | multiplier | 0.850       | 1.150       | HRU 29 soil layer 2 moist albedo       |
| <i>sol_alb_2_30</i> | multiplier | 0.850       | 1.150       | HRU 30 soil layer 2 moist albedo       |
| <i>sol_alb_2_31</i> | multiplier | 0.850       | 1.150       | HRU 31 soil layer 2 moist albedo       |
| <i>sol_alb_2_32</i> | multiplier | 0.850       | 1.150       | HRU 32 soil layer 2 moist albedo       |
| <i>sol_alb_2_33</i> | multiplier | 0.850       | 1.150       | HRU 33 soil layer 2 moist albedo       |
| <i>sol_alb_2_34</i> | multiplier | 0.850       | 1.150       | HRU 34 soil layer 2 moist albedo       |
| <i>sol_alb_2_35</i> | multiplier | 0.850       | 1.150       | HRU 35 soil layer 2 moist albedo       |
| <i>sol_alb_2_36</i> | multiplier | 0.850       | 1.150       | HRU 36 soil layer 2 moist albedo       |
| <i>sol_alb_2_37</i> | multiplier | 0.850       | 1.150       | HRU 37 soil layer 2 moist albedo       |
| <i>sol_alb_2_38</i> | multiplier | 0.850       | 1.150       | HRU 38 soil layer 2 moist albedo       |
| <i>sol_alb_2_39</i> | multiplier | 0.850       | 1.150       | HRU 39 soil layer 2 moist albedo       |
| <i>sol_alb_2_40</i> | multiplier | 0.850       | 1.150       | HRU 40 soil layer 2 moist albedo       |
| <i>sol_alb_2_41</i> | multiplier | 0.850       | 1.150       | HRU 41 soil layer 2 moist albedo       |
| <i>sol_alb_2_42</i> | multiplier | 0.850       | 1.150       | HRU 42 soil layer 2 moist albedo       |
| <i>sol_alb_2_43</i> | multiplier | 0.850       | 1.150       | HRU 43 soil layer 2 moist albedo       |
| <i>sol_alb_2_44</i> | multiplier | 0.850       | 1.150       | HRU 44 soil layer 2 moist albedo       |
| <i>sol_alb_2_45</i> | multiplier | 0.850       | 1.150       | HRU 45 soil layer 2 moist albedo       |
| <i>sol_alb_2_46</i> | multiplier | 0.850       | 1.150       | HRU 46 soil layer 2 moist albedo       |
| <i>sol_alb_2_47</i> | multiplier | 0.850       | 1.150       | HRU 47 soil layer 2 moist albedo       |
| <i>sol_alb_2_r</i>  | multiplier | 1.000       | 5.000       | subbasin soil layer 2 moist albedo     |
| <i>sol_alb_3_01</i> | multiplier | 0.850       | 1.150       | HRU 01 soil layer 3 moist albedo       |
| <i>sol_alb_3_02</i> | multiplier | 0.850       | 1.150       | HRU 02 soil layer 3 moist albedo       |
| <i>sol_alb_3_03</i> | multiplier | 0.850       | 1.150       | HRU 03 soil layer 3 moist albedo       |

Continued on next page

| Parameter           | Type       | Lower Bound | Upper Bound | Description (with units if applicable) |
|---------------------|------------|-------------|-------------|----------------------------------------|
| <i>sol_alb_3_04</i> | multiplier | 0.850       | 1.150       | HRU 04 soil layer 3 moist albedo       |
| <i>sol_alb_3_05</i> | multiplier | 0.850       | 1.150       | HRU 05 soil layer 3 moist albedo       |
| <i>sol_alb_3_06</i> | multiplier | 0.850       | 1.150       | HRU 06 soil layer 3 moist albedo       |
| <i>sol_alb_3_07</i> | multiplier | 0.850       | 1.150       | HRU 07 soil layer 3 moist albedo       |
| <i>sol_alb_3_08</i> | multiplier | 0.850       | 1.150       | HRU 08 soil layer 3 moist albedo       |
| <i>sol_alb_3_09</i> | multiplier | 0.850       | 1.150       | HRU 09 soil layer 3 moist albedo       |
| <i>sol_alb_3_10</i> | multiplier | 0.850       | 1.150       | HRU 10 soil layer 3 moist albedo       |
| <i>sol_alb_3_11</i> | multiplier | 0.850       | 1.150       | HRU 11 soil layer 3 moist albedo       |
| <i>sol_alb_3_12</i> | multiplier | 0.850       | 1.150       | HRU 12 soil layer 3 moist albedo       |
| <i>sol_alb_3_13</i> | multiplier | 0.850       | 1.150       | HRU 13 soil layer 3 moist albedo       |
| <i>sol_alb_3_14</i> | multiplier | 0.850       | 1.150       | HRU 14 soil layer 3 moist albedo       |
| <i>sol_alb_3_15</i> | multiplier | 0.850       | 1.150       | HRU 15 soil layer 3 moist albedo       |
| <i>sol_alb_3_16</i> | multiplier | 0.850       | 1.150       | HRU 16 soil layer 3 moist albedo       |
| <i>sol_alb_3_17</i> | multiplier | 0.850       | 1.150       | HRU 17 soil layer 3 moist albedo       |
| <i>sol_alb_3_18</i> | multiplier | 0.850       | 1.150       | HRU 18 soil layer 3 moist albedo       |
| <i>sol_alb_3_19</i> | multiplier | 0.850       | 1.150       | HRU 19 soil layer 3 moist albedo       |
| <i>sol_alb_3_20</i> | multiplier | 0.850       | 1.150       | HRU 20 soil layer 3 moist albedo       |
| <i>sol_alb_3_21</i> | multiplier | 0.850       | 1.150       | HRU 21 soil layer 3 moist albedo       |
| <i>sol_alb_3_22</i> | multiplier | 0.850       | 1.150       | HRU 22 soil layer 3 moist albedo       |
| <i>sol_alb_3_23</i> | multiplier | 0.850       | 1.150       | HRU 23 soil layer 3 moist albedo       |
| <i>sol_alb_3_24</i> | multiplier | 0.850       | 1.150       | HRU 24 soil layer 3 moist albedo       |
| <i>sol_alb_3_25</i> | multiplier | 0.850       | 1.150       | HRU 25 soil layer 3 moist albedo       |
| <i>sol_alb_3_26</i> | multiplier | 0.850       | 1.150       | HRU 26 soil layer 3 moist albedo       |
| <i>sol_alb_3_27</i> | multiplier | 0.850       | 1.150       | HRU 27 soil layer 3 moist albedo       |
| <i>sol_alb_3_28</i> | multiplier | 0.850       | 1.150       | HRU 28 soil layer 3 moist albedo       |
| <i>sol_alb_3_29</i> | multiplier | 0.850       | 1.150       | HRU 29 soil layer 3 moist albedo       |
| <i>sol_alb_3_30</i> | multiplier | 0.850       | 1.150       | HRU 30 soil layer 3 moist albedo       |
| <i>sol_alb_3_31</i> | multiplier | 0.850       | 1.150       | HRU 31 soil layer 3 moist albedo       |
| <i>sol_alb_3_32</i> | multiplier | 0.850       | 1.150       | HRU 32 soil layer 3 moist albedo       |
| <i>sol_alb_3_33</i> | multiplier | 0.850       | 1.150       | HRU 33 soil layer 3 moist albedo       |
| <i>sol_alb_3_34</i> | multiplier | 0.850       | 1.150       | HRU 34 soil layer 3 moist albedo       |
| <i>sol_alb_3_35</i> | multiplier | 0.850       | 1.150       | HRU 35 soil layer 3 moist albedo       |
| <i>sol_alb_3_36</i> | multiplier | 0.850       | 1.150       | HRU 36 soil layer 3 moist albedo       |
| <i>sol_alb_3_37</i> | multiplier | 0.850       | 1.150       | HRU 37 soil layer 3 moist albedo       |
| <i>sol_alb_3_38</i> | multiplier | 0.850       | 1.150       | HRU 38 soil layer 3 moist albedo       |
| <i>sol_alb_3_39</i> | multiplier | 0.850       | 1.150       | HRU 39 soil layer 3 moist albedo       |
| <i>sol_alb_3_40</i> | multiplier | 0.850       | 1.150       | HRU 40 soil layer 3 moist albedo       |
| <i>sol_alb_3_41</i> | multiplier | 0.850       | 1.150       | HRU 41 soil layer 3 moist albedo       |
| <i>sol_alb_3_42</i> | multiplier | 0.850       | 1.150       | HRU 42 soil layer 3 moist albedo       |
| <i>sol_alb_3_43</i> | multiplier | 0.850       | 1.150       | HRU 43 soil layer 3 moist albedo       |
| <i>sol_alb_3_44</i> | multiplier | 0.850       | 1.150       | HRU 44 soil layer 3 moist albedo       |

Continued on next page

| Parameter           | Type       | Lower Bound | Upper Bound | Description (with units if applicable)               |
|---------------------|------------|-------------|-------------|------------------------------------------------------|
| <i>sol_alb_3_45</i> | multiplier | 0.850       | 1.150       | HRU 45 soil layer 3 moist albedo                     |
| <i>sol_alb_3_46</i> | multiplier | 0.850       | 1.150       | HRU 46 soil layer 3 moist albedo                     |
| <i>sol_alb_3_47</i> | multiplier | 0.850       | 1.150       | HRU 47 soil layer 3 moist albedo                     |
| <i>sol_alb_3_r</i>  | multiplier | 1.000       | 5.000       | subbasin soil layer 3 moist albedo                   |
| <i>sol_awc_1_01</i> | multiplier | 0.850       | 1.150       | HRU 01 soil layer 1 available water capacity (mm/mm) |
| <i>sol_awc_1_02</i> | multiplier | 0.850       | 1.150       | HRU 02 soil layer 1 available water capacity (mm/mm) |
| <i>sol_awc_1_03</i> | multiplier | 0.850       | 1.150       | HRU 03 soil layer 1 available water capacity (mm/mm) |
| <i>sol_awc_1_04</i> | multiplier | 0.850       | 1.150       | HRU 04 soil layer 1 available water capacity (mm/mm) |
| <i>sol_awc_1_05</i> | multiplier | 0.850       | 1.150       | HRU 05 soil layer 1 available water capacity (mm/mm) |
| <i>sol_awc_1_06</i> | multiplier | 0.850       | 1.150       | HRU 06 soil layer 1 available water capacity (mm/mm) |
| <i>sol_awc_1_07</i> | multiplier | 0.850       | 1.150       | HRU 07 soil layer 1 available water capacity (mm/mm) |
| <i>sol_awc_1_08</i> | multiplier | 0.850       | 1.150       | HRU 08 soil layer 1 available water capacity (mm/mm) |
| <i>sol_awc_1_09</i> | multiplier | 0.850       | 1.150       | HRU 09 soil layer 1 available water capacity (mm/mm) |
| <i>sol_awc_1_10</i> | multiplier | 0.850       | 1.150       | HRU 10 soil layer 1 available water capacity (mm/mm) |
| <i>sol_awc_1_11</i> | multiplier | 0.850       | 1.150       | HRU 11 soil layer 1 available water capacity (mm/mm) |
| <i>sol_awc_1_12</i> | multiplier | 0.850       | 1.150       | HRU 12 soil layer 1 available water capacity (mm/mm) |
| <i>sol_awc_1_13</i> | multiplier | 0.850       | 1.150       | HRU 13 soil layer 1 available water capacity (mm/mm) |
| <i>sol_awc_1_14</i> | multiplier | 0.850       | 1.150       | HRU 14 soil layer 1 available water capacity (mm/mm) |
| <i>sol_awc_1_15</i> | multiplier | 0.850       | 1.150       | HRU 15 soil layer 1 available water capacity (mm/mm) |
| <i>sol_awc_1_16</i> | multiplier | 0.850       | 1.150       | HRU 16 soil layer 1 available water capacity (mm/mm) |
| <i>sol_awc_1_17</i> | multiplier | 0.850       | 1.150       | HRU 17 soil layer 1 available water capacity (mm/mm) |
| <i>sol_awc_1_18</i> | multiplier | 0.850       | 1.150       | HRU 18 soil layer 1 available water capacity (mm/mm) |
| <i>sol_awc_1_19</i> | multiplier | 0.850       | 1.150       | HRU 19 soil layer 1 available water capacity (mm/mm) |
| <i>sol_awc_1_20</i> | multiplier | 0.850       | 1.150       | HRU 20 soil layer 1 available water capacity (mm/mm) |
| <i>sol_awc_1_21</i> | multiplier | 0.850       | 1.150       | HRU 21 soil layer 1 available water capacity (mm/mm) |
| <i>sol_awc_1_22</i> | multiplier | 0.850       | 1.150       | HRU 22 soil layer 1 available water capacity (mm/mm) |
| <i>sol_awc_1_23</i> | multiplier | 0.850       | 1.150       | HRU 23 soil layer 1 available water capacity (mm/mm) |
| <i>sol_awc_1_24</i> | multiplier | 0.850       | 1.150       | HRU 24 soil layer 1 available water capacity (mm/mm) |
| <i>sol_awc_1_25</i> | multiplier | 0.850       | 1.150       | HRU 25 soil layer 1 available water capacity (mm/mm) |
| <i>sol_awc_1_26</i> | multiplier | 0.850       | 1.150       | HRU 26 soil layer 1 available water capacity (mm/mm) |
| <i>sol_awc_1_27</i> | multiplier | 0.850       | 1.150       | HRU 27 soil layer 1 available water capacity (mm/mm) |
| <i>sol_awc_1_28</i> | multiplier | 0.850       | 1.150       | HRU 28 soil layer 1 available water capacity (mm/mm) |
| <i>sol_awc_1_29</i> | multiplier | 0.850       | 1.150       | HRU 29 soil layer 1 available water capacity (mm/mm) |
| <i>sol_awc_1_30</i> | multiplier | 0.850       | 1.150       | HRU 30 soil layer 1 available water capacity (mm/mm) |
| <i>sol_awc_1_31</i> | multiplier | 0.850       | 1.150       | HRU 31 soil layer 1 available water capacity (mm/mm) |
| <i>sol_awc_1_32</i> | multiplier | 0.850       | 1.150       | HRU 32 soil layer 1 available water capacity (mm/mm) |
| <i>sol_awc_1_33</i> | multiplier | 0.850       | 1.150       | HRU 33 soil layer 1 available water capacity (mm/mm) |
| <i>sol_awc_1_34</i> | multiplier | 0.850       | 1.150       | HRU 34 soil layer 1 available water capacity (mm/mm) |
| <i>sol_awc_1_35</i> | multiplier | 0.850       | 1.150       | HRU 35 soil layer 1 available water capacity (mm/mm) |
| <i>sol_awc_1_36</i> | multiplier | 0.850       | 1.150       | HRU 36 soil layer 1 available water capacity (mm/mm) |
| <i>sol_awc_1_37</i> | multiplier | 0.850       | 1.150       | HRU 37 soil layer 1 available water capacity (mm/mm) |

Continued on next page

| Parameter           | Type       | Lower Bound | Upper Bound | Description (with units if applicable)                 |
|---------------------|------------|-------------|-------------|--------------------------------------------------------|
| <i>sol_awc_1_38</i> | multiplier | 0.850       | 1.150       | HRU 38 soil layer 1 available water capacity (mm/mm)   |
| <i>sol_awc_1_39</i> | multiplier | 0.850       | 1.150       | HRU 39 soil layer 1 available water capacity (mm/mm)   |
| <i>sol_awc_1_40</i> | multiplier | 0.850       | 1.150       | HRU 40 soil layer 1 available water capacity (mm/mm)   |
| <i>sol_awc_1_41</i> | multiplier | 0.850       | 1.150       | HRU 41 soil layer 1 available water capacity (mm/mm)   |
| <i>sol_awc_1_42</i> | multiplier | 0.850       | 1.150       | HRU 42 soil layer 1 available water capacity (mm/mm)   |
| <i>sol_awc_1_43</i> | multiplier | 0.850       | 1.150       | HRU 43 soil layer 1 available water capacity (mm/mm)   |
| <i>sol_awc_1_44</i> | multiplier | 0.850       | 1.150       | HRU 44 soil layer 1 available water capacity (mm/mm)   |
| <i>sol_awc_1_45</i> | multiplier | 0.850       | 1.150       | HRU 45 soil layer 1 available water capacity (mm/mm)   |
| <i>sol_awc_1_46</i> | multiplier | 0.850       | 1.150       | HRU 46 soil layer 1 available water capacity (mm/mm)   |
| <i>sol_awc_1_47</i> | multiplier | 0.850       | 1.150       | HRU 47 soil layer 1 available water capacity (mm/mm)   |
| <i>sol_awc_1_r</i>  | multiplier | 1.000       | 5.000       | subbasin soil layer 1 available water capacity (mm/mm) |
| <i>sol_awc_2_01</i> | multiplier | 0.850       | 1.150       | HRU 01 soil layer 2 available water capacity (mm/mm)   |
| <i>sol_awc_2_02</i> | multiplier | 0.850       | 1.150       | HRU 02 soil layer 2 available water capacity (mm/mm)   |
| <i>sol_awc_2_03</i> | multiplier | 0.850       | 1.150       | HRU 03 soil layer 2 available water capacity (mm/mm)   |
| <i>sol_awc_2_04</i> | multiplier | 0.850       | 1.150       | HRU 04 soil layer 2 available water capacity (mm/mm)   |
| <i>sol_awc_2_05</i> | multiplier | 0.850       | 1.150       | HRU 05 soil layer 2 available water capacity (mm/mm)   |
| <i>sol_awc_2_06</i> | multiplier | 0.850       | 1.150       | HRU 06 soil layer 2 available water capacity (mm/mm)   |
| <i>sol_awc_2_07</i> | multiplier | 0.850       | 1.150       | HRU 07 soil layer 2 available water capacity (mm/mm)   |
| <i>sol_awc_2_08</i> | multiplier | 0.850       | 1.150       | HRU 08 soil layer 2 available water capacity (mm/mm)   |
| <i>sol_awc_2_09</i> | multiplier | 0.850       | 1.150       | HRU 09 soil layer 2 available water capacity (mm/mm)   |
| <i>sol_awc_2_10</i> | multiplier | 0.850       | 1.150       | HRU 10 soil layer 2 available water capacity (mm/mm)   |
| <i>sol_awc_2_11</i> | multiplier | 0.850       | 1.150       | HRU 11 soil layer 2 available water capacity (mm/mm)   |
| <i>sol_awc_2_12</i> | multiplier | 0.850       | 1.150       | HRU 12 soil layer 2 available water capacity (mm/mm)   |
| <i>sol_awc_2_13</i> | multiplier | 0.850       | 1.150       | HRU 13 soil layer 2 available water capacity (mm/mm)   |
| <i>sol_awc_2_14</i> | multiplier | 0.850       | 1.150       | HRU 14 soil layer 2 available water capacity (mm/mm)   |
| <i>sol_awc_2_15</i> | multiplier | 0.850       | 1.150       | HRU 15 soil layer 2 available water capacity (mm/mm)   |
| <i>sol_awc_2_16</i> | multiplier | 0.850       | 1.150       | HRU 16 soil layer 2 available water capacity (mm/mm)   |
| <i>sol_awc_2_17</i> | multiplier | 0.850       | 1.150       | HRU 17 soil layer 2 available water capacity (mm/mm)   |
| <i>sol_awc_2_18</i> | multiplier | 0.850       | 1.150       | HRU 18 soil layer 2 available water capacity (mm/mm)   |
| <i>sol_awc_2_19</i> | multiplier | 0.850       | 1.150       | HRU 19 soil layer 2 available water capacity (mm/mm)   |
| <i>sol_awc_2_20</i> | multiplier | 0.850       | 1.150       | HRU 20 soil layer 2 available water capacity (mm/mm)   |
| <i>sol_awc_2_21</i> | multiplier | 0.850       | 1.150       | HRU 21 soil layer 2 available water capacity (mm/mm)   |
| <i>sol_awc_2_22</i> | multiplier | 0.850       | 1.150       | HRU 22 soil layer 2 available water capacity (mm/mm)   |
| <i>sol_awc_2_23</i> | multiplier | 0.850       | 1.150       | HRU 23 soil layer 2 available water capacity (mm/mm)   |
| <i>sol_awc_2_24</i> | multiplier | 0.850       | 1.150       | HRU 24 soil layer 2 available water capacity (mm/mm)   |
| <i>sol_awc_2_25</i> | multiplier | 0.850       | 1.150       | HRU 25 soil layer 2 available water capacity (mm/mm)   |
| <i>sol_awc_2_26</i> | multiplier | 0.850       | 1.150       | HRU 26 soil layer 2 available water capacity (mm/mm)   |
| <i>sol_awc_2_27</i> | multiplier | 0.850       | 1.150       | HRU 27 soil layer 2 available water capacity (mm/mm)   |
| <i>sol_awc_2_28</i> | multiplier | 0.850       | 1.150       | HRU 28 soil layer 2 available water capacity (mm/mm)   |
| <i>sol_awc_2_29</i> | multiplier | 0.850       | 1.150       | HRU 29 soil layer 2 available water capacity (mm/mm)   |
| <i>sol_awc_2_30</i> | multiplier | 0.850       | 1.150       | HRU 30 soil layer 2 available water capacity (mm/mm)   |

Continued on next page

| Parameter           | Type       | Lower Bound | Upper Bound | Description (with units if applicable)                 |
|---------------------|------------|-------------|-------------|--------------------------------------------------------|
| <i>sol_awc_2_31</i> | multiplier | 0.850       | 1.150       | HRU 31 soil layer 2 available water capacity (mm/mm)   |
| <i>sol_awc_2_32</i> | multiplier | 0.850       | 1.150       | HRU 32 soil layer 2 available water capacity (mm/mm)   |
| <i>sol_awc_2_33</i> | multiplier | 0.850       | 1.150       | HRU 33 soil layer 2 available water capacity (mm/mm)   |
| <i>sol_awc_2_34</i> | multiplier | 0.850       | 1.150       | HRU 34 soil layer 2 available water capacity (mm/mm)   |
| <i>sol_awc_2_35</i> | multiplier | 0.850       | 1.150       | HRU 35 soil layer 2 available water capacity (mm/mm)   |
| <i>sol_awc_2_36</i> | multiplier | 0.850       | 1.150       | HRU 36 soil layer 2 available water capacity (mm/mm)   |
| <i>sol_awc_2_37</i> | multiplier | 0.850       | 1.150       | HRU 37 soil layer 2 available water capacity (mm/mm)   |
| <i>sol_awc_2_38</i> | multiplier | 0.850       | 1.150       | HRU 38 soil layer 2 available water capacity (mm/mm)   |
| <i>sol_awc_2_39</i> | multiplier | 0.850       | 1.150       | HRU 39 soil layer 2 available water capacity (mm/mm)   |
| <i>sol_awc_2_40</i> | multiplier | 0.850       | 1.150       | HRU 40 soil layer 2 available water capacity (mm/mm)   |
| <i>sol_awc_2_41</i> | multiplier | 0.850       | 1.150       | HRU 41 soil layer 2 available water capacity (mm/mm)   |
| <i>sol_awc_2_42</i> | multiplier | 0.850       | 1.150       | HRU 42 soil layer 2 available water capacity (mm/mm)   |
| <i>sol_awc_2_43</i> | multiplier | 0.850       | 1.150       | HRU 43 soil layer 2 available water capacity (mm/mm)   |
| <i>sol_awc_2_44</i> | multiplier | 0.850       | 1.150       | HRU 44 soil layer 2 available water capacity (mm/mm)   |
| <i>sol_awc_2_45</i> | multiplier | 0.850       | 1.150       | HRU 45 soil layer 2 available water capacity (mm/mm)   |
| <i>sol_awc_2_46</i> | multiplier | 0.850       | 1.150       | HRU 46 soil layer 2 available water capacity (mm/mm)   |
| <i>sol_awc_2_47</i> | multiplier | 0.850       | 1.150       | HRU 47 soil layer 2 available water capacity (mm/mm)   |
| <i>sol_awc_2_r</i>  | multiplier | 1.000       | 5.000       | subbasin soil layer 2 available water capacity (mm/mm) |
| <i>sol_awc_3_01</i> | multiplier | 0.850       | 1.150       | HRU 01 soil layer 3 available water capacity (mm/mm)   |
| <i>sol_awc_3_02</i> | multiplier | 0.850       | 1.150       | HRU 02 soil layer 3 available water capacity (mm/mm)   |
| <i>sol_awc_3_03</i> | multiplier | 0.850       | 1.150       | HRU 03 soil layer 3 available water capacity (mm/mm)   |
| <i>sol_awc_3_04</i> | multiplier | 0.850       | 1.150       | HRU 04 soil layer 3 available water capacity (mm/mm)   |
| <i>sol_awc_3_05</i> | multiplier | 0.850       | 1.150       | HRU 05 soil layer 3 available water capacity (mm/mm)   |
| <i>sol_awc_3_06</i> | multiplier | 0.850       | 1.150       | HRU 06 soil layer 3 available water capacity (mm/mm)   |
| <i>sol_awc_3_07</i> | multiplier | 0.850       | 1.150       | HRU 07 soil layer 3 available water capacity (mm/mm)   |
| <i>sol_awc_3_08</i> | multiplier | 0.850       | 1.150       | HRU 08 soil layer 3 available water capacity (mm/mm)   |
| <i>sol_awc_3_09</i> | multiplier | 0.850       | 1.150       | HRU 09 soil layer 3 available water capacity (mm/mm)   |
| <i>sol_awc_3_10</i> | multiplier | 0.850       | 1.150       | HRU 10 soil layer 3 available water capacity (mm/mm)   |
| <i>sol_awc_3_11</i> | multiplier | 0.850       | 1.150       | HRU 11 soil layer 3 available water capacity (mm/mm)   |
| <i>sol_awc_3_12</i> | multiplier | 0.850       | 1.150       | HRU 12 soil layer 3 available water capacity (mm/mm)   |
| <i>sol_awc_3_13</i> | multiplier | 0.850       | 1.150       | HRU 13 soil layer 3 available water capacity (mm/mm)   |
| <i>sol_awc_3_14</i> | multiplier | 0.850       | 1.150       | HRU 14 soil layer 3 available water capacity (mm/mm)   |
| <i>sol_awc_3_15</i> | multiplier | 0.850       | 1.150       | HRU 15 soil layer 3 available water capacity (mm/mm)   |
| <i>sol_awc_3_16</i> | multiplier | 0.850       | 1.150       | HRU 16 soil layer 3 available water capacity (mm/mm)   |
| <i>sol_awc_3_17</i> | multiplier | 0.850       | 1.150       | HRU 17 soil layer 3 available water capacity (mm/mm)   |
| <i>sol_awc_3_18</i> | multiplier | 0.850       | 1.150       | HRU 18 soil layer 3 available water capacity (mm/mm)   |
| <i>sol_awc_3_19</i> | multiplier | 0.850       | 1.150       | HRU 19 soil layer 3 available water capacity (mm/mm)   |
| <i>sol_awc_3_20</i> | multiplier | 0.850       | 1.150       | HRU 20 soil layer 3 available water capacity (mm/mm)   |
| <i>sol_awc_3_21</i> | multiplier | 0.850       | 1.150       | HRU 21 soil layer 3 available water capacity (mm/mm)   |
| <i>sol_awc_3_22</i> | multiplier | 0.850       | 1.150       | HRU 22 soil layer 3 available water capacity (mm/mm)   |
| <i>sol_awc_3_23</i> | multiplier | 0.850       | 1.150       | HRU 23 soil layer 3 available water capacity (mm/mm)   |

Continued on next page



| Parameter           | Type       | Lower Bound | Upper Bound | Description (with units if applicable)                       |
|---------------------|------------|-------------|-------------|--------------------------------------------------------------|
| <i>sol_awc_3_24</i> | multiplier | 0.850       | 1.150       | HRU 24 soil layer 3 available water capacity (mm/mm)         |
| <i>sol_awc_3_25</i> | multiplier | 0.850       | 1.150       | HRU 25 soil layer 3 available water capacity (mm/mm)         |
| <i>sol_awc_3_26</i> | multiplier | 0.850       | 1.150       | HRU 26 soil layer 3 available water capacity (mm/mm)         |
| <i>sol_awc_3_27</i> | multiplier | 0.850       | 1.150       | HRU 27 soil layer 3 available water capacity (mm/mm)         |
| <i>sol_awc_3_28</i> | multiplier | 0.850       | 1.150       | HRU 28 soil layer 3 available water capacity (mm/mm)         |
| <i>sol_awc_3_29</i> | multiplier | 0.850       | 1.150       | HRU 29 soil layer 3 available water capacity (mm/mm)         |
| <i>sol_awc_3_30</i> | multiplier | 0.850       | 1.150       | HRU 30 soil layer 3 available water capacity (mm/mm)         |
| <i>sol_awc_3_31</i> | multiplier | 0.850       | 1.150       | HRU 31 soil layer 3 available water capacity (mm/mm)         |
| <i>sol_awc_3_32</i> | multiplier | 0.850       | 1.150       | HRU 32 soil layer 3 available water capacity (mm/mm)         |
| <i>sol_awc_3_33</i> | multiplier | 0.850       | 1.150       | HRU 33 soil layer 3 available water capacity (mm/mm)         |
| <i>sol_awc_3_34</i> | multiplier | 0.850       | 1.150       | HRU 34 soil layer 3 available water capacity (mm/mm)         |
| <i>sol_awc_3_35</i> | multiplier | 0.850       | 1.150       | HRU 35 soil layer 3 available water capacity (mm/mm)         |
| <i>sol_awc_3_36</i> | multiplier | 0.850       | 1.150       | HRU 36 soil layer 3 available water capacity (mm/mm)         |
| <i>sol_awc_3_37</i> | multiplier | 0.850       | 1.150       | HRU 37 soil layer 3 available water capacity (mm/mm)         |
| <i>sol_awc_3_38</i> | multiplier | 0.850       | 1.150       | HRU 38 soil layer 3 available water capacity (mm/mm)         |
| <i>sol_awc_3_39</i> | multiplier | 0.850       | 1.150       | HRU 39 soil layer 3 available water capacity (mm/mm)         |
| <i>sol_awc_3_40</i> | multiplier | 0.850       | 1.150       | HRU 40 soil layer 3 available water capacity (mm/mm)         |
| <i>sol_awc_3_41</i> | multiplier | 0.850       | 1.150       | HRU 41 soil layer 3 available water capacity (mm/mm)         |
| <i>sol_awc_3_42</i> | multiplier | 0.850       | 1.150       | HRU 42 soil layer 3 available water capacity (mm/mm)         |
| <i>sol_awc_3_43</i> | multiplier | 0.850       | 1.150       | HRU 43 soil layer 3 available water capacity (mm/mm)         |
| <i>sol_awc_3_44</i> | multiplier | 0.850       | 1.150       | HRU 44 soil layer 3 available water capacity (mm/mm)         |
| <i>sol_awc_3_45</i> | multiplier | 0.850       | 1.150       | HRU 45 soil layer 3 available water capacity (mm/mm)         |
| <i>sol_awc_3_46</i> | multiplier | 0.850       | 1.150       | HRU 46 soil layer 3 available water capacity (mm/mm)         |
| <i>sol_awc_3_47</i> | multiplier | 0.850       | 1.150       | HRU 47 soil layer 3 available water capacity (mm/mm)         |
| <i>sol_awc_3_r</i>  | multiplier | 1.000       | 5.000       | subbasin soil layer 3 available water capacity (mm/mm)       |
| <i>sol.k_1_01</i>   | multiplier | 0.850       | 1.150       | HRU 01 soil layer 1 saturated hydraulic conductivity (mm/hr) |
| <i>sol.k_1_02</i>   | multiplier | 0.850       | 1.150       | HRU 02 soil layer 1 saturated hydraulic conductivity (mm/hr) |
| <i>sol.k_1_03</i>   | multiplier | 0.850       | 1.150       | HRU 03 soil layer 1 saturated hydraulic conductivity (mm/hr) |
| <i>sol.k_1_04</i>   | multiplier | 0.850       | 1.150       | HRU 04 soil layer 1 saturated hydraulic conductivity (mm/hr) |
| <i>sol.k_1_05</i>   | multiplier | 0.850       | 1.150       | HRU 05 soil layer 1 saturated hydraulic conductivity (mm/hr) |
| <i>sol.k_1_06</i>   | multiplier | 0.850       | 1.150       | HRU 06 soil layer 1 saturated hydraulic conductivity (mm/hr) |
| <i>sol.k_1_07</i>   | multiplier | 0.850       | 1.150       | HRU 07 soil layer 1 saturated hydraulic conductivity (mm/hr) |
| <i>sol.k_1_08</i>   | multiplier | 0.850       | 1.150       | HRU 08 soil layer 1 saturated hydraulic conductivity (mm/hr) |
| <i>sol.k_1_09</i>   | multiplier | 0.850       | 1.150       | HRU 09 soil layer 1 saturated hydraulic conductivity (mm/hr) |
| <i>sol.k_1_10</i>   | multiplier | 0.850       | 1.150       | HRU 10 soil layer 1 saturated hydraulic conductivity (mm/hr) |
| <i>sol.k_1_11</i>   | multiplier | 0.850       | 1.150       | HRU 11 soil layer 1 saturated hydraulic conductivity (mm/hr) |
| <i>sol.k_1_12</i>   | multiplier | 0.850       | 1.150       | HRU 12 soil layer 1 saturated hydraulic conductivity (mm/hr) |
| <i>sol.k_1_13</i>   | multiplier | 0.850       | 1.150       | HRU 13 soil layer 1 saturated hydraulic conductivity (mm/hr) |
| <i>sol.k_1_14</i>   | multiplier | 0.850       | 1.150       | HRU 14 soil layer 1 saturated hydraulic conductivity (mm/hr) |
| <i>sol.k_1_15</i>   | multiplier | 0.850       | 1.150       | HRU 15 soil layer 1 saturated hydraulic conductivity (mm/hr) |
| <i>sol.k_1_16</i>   | multiplier | 0.850       | 1.150       | HRU 16 soil layer 1 saturated hydraulic conductivity (mm/hr) |

Continued on next page



| Parameter         | Type       | Lower Bound | Upper Bound | Description (with units if applicable)                         |
|-------------------|------------|-------------|-------------|----------------------------------------------------------------|
| <i>sol.k_2_10</i> | multiplier | 0.850       | 1.150       | HRU 10 soil layer 2 saturated hydraulic conductivity (mm/hr)   |
| <i>sol.k_2_11</i> | multiplier | 0.850       | 1.150       | HRU 11 soil layer 2 saturated hydraulic conductivity (mm/hr)   |
| <i>sol.k_2_12</i> | multiplier | 0.850       | 1.150       | HRU 12 soil layer 2 saturated hydraulic conductivity (mm/hr)   |
| <i>sol.k_2_13</i> | multiplier | 0.850       | 1.150       | HRU 13 soil layer 2 saturated hydraulic conductivity (mm/hr)   |
| <i>sol.k_2_14</i> | multiplier | 0.850       | 1.150       | HRU 14 soil layer 2 saturated hydraulic conductivity (mm/hr)   |
| <i>sol.k_2_15</i> | multiplier | 0.850       | 1.150       | HRU 15 soil layer 2 saturated hydraulic conductivity (mm/hr)   |
| <i>sol.k_2_16</i> | multiplier | 0.850       | 1.150       | HRU 16 soil layer 2 saturated hydraulic conductivity (mm/hr)   |
| <i>sol.k_2_17</i> | multiplier | 0.850       | 1.150       | HRU 17 soil layer 2 saturated hydraulic conductivity (mm/hr)   |
| <i>sol.k_2_18</i> | multiplier | 0.850       | 1.150       | HRU 18 soil layer 2 saturated hydraulic conductivity (mm/hr)   |
| <i>sol.k_2_19</i> | multiplier | 0.850       | 1.150       | HRU 19 soil layer 2 saturated hydraulic conductivity (mm/hr)   |
| <i>sol.k_2_20</i> | multiplier | 0.850       | 1.150       | HRU 20 soil layer 2 saturated hydraulic conductivity (mm/hr)   |
| <i>sol.k_2_21</i> | multiplier | 0.850       | 1.150       | HRU 21 soil layer 2 saturated hydraulic conductivity (mm/hr)   |
| <i>sol.k_2_22</i> | multiplier | 0.850       | 1.150       | HRU 22 soil layer 2 saturated hydraulic conductivity (mm/hr)   |
| <i>sol.k_2_23</i> | multiplier | 0.850       | 1.150       | HRU 23 soil layer 2 saturated hydraulic conductivity (mm/hr)   |
| <i>sol.k_2_24</i> | multiplier | 0.850       | 1.150       | HRU 24 soil layer 2 saturated hydraulic conductivity (mm/hr)   |
| <i>sol.k_2_25</i> | multiplier | 0.850       | 1.150       | HRU 25 soil layer 2 saturated hydraulic conductivity (mm/hr)   |
| <i>sol.k_2_26</i> | multiplier | 0.850       | 1.150       | HRU 26 soil layer 2 saturated hydraulic conductivity (mm/hr)   |
| <i>sol.k_2_27</i> | multiplier | 0.850       | 1.150       | HRU 27 soil layer 2 saturated hydraulic conductivity (mm/hr)   |
| <i>sol.k_2_28</i> | multiplier | 0.850       | 1.150       | HRU 28 soil layer 2 saturated hydraulic conductivity (mm/hr)   |
| <i>sol.k_2_29</i> | multiplier | 0.850       | 1.150       | HRU 29 soil layer 2 saturated hydraulic conductivity (mm/hr)   |
| <i>sol.k_2_30</i> | multiplier | 0.850       | 1.150       | HRU 30 soil layer 2 saturated hydraulic conductivity (mm/hr)   |
| <i>sol.k_2_31</i> | multiplier | 0.850       | 1.150       | HRU 31 soil layer 2 saturated hydraulic conductivity (mm/hr)   |
| <i>sol.k_2_32</i> | multiplier | 0.850       | 1.150       | HRU 32 soil layer 2 saturated hydraulic conductivity (mm/hr)   |
| <i>sol.k_2_33</i> | multiplier | 0.850       | 1.150       | HRU 33 soil layer 2 saturated hydraulic conductivity (mm/hr)   |
| <i>sol.k_2_34</i> | multiplier | 0.850       | 1.150       | HRU 34 soil layer 2 saturated hydraulic conductivity (mm/hr)   |
| <i>sol.k_2_35</i> | multiplier | 0.850       | 1.150       | HRU 35 soil layer 2 saturated hydraulic conductivity (mm/hr)   |
| <i>sol.k_2_36</i> | multiplier | 0.850       | 1.150       | HRU 36 soil layer 2 saturated hydraulic conductivity (mm/hr)   |
| <i>sol.k_2_37</i> | multiplier | 0.850       | 1.150       | HRU 37 soil layer 2 saturated hydraulic conductivity (mm/hr)   |
| <i>sol.k_2_38</i> | multiplier | 0.850       | 1.150       | HRU 38 soil layer 2 saturated hydraulic conductivity (mm/hr)   |
| <i>sol.k_2_39</i> | multiplier | 0.850       | 1.150       | HRU 39 soil layer 2 saturated hydraulic conductivity (mm/hr)   |
| <i>sol.k_2_40</i> | multiplier | 0.850       | 1.150       | HRU 40 soil layer 2 saturated hydraulic conductivity (mm/hr)   |
| <i>sol.k_2_41</i> | multiplier | 0.850       | 1.150       | HRU 41 soil layer 2 saturated hydraulic conductivity (mm/hr)   |
| <i>sol.k_2_42</i> | multiplier | 0.850       | 1.150       | HRU 42 soil layer 2 saturated hydraulic conductivity (mm/hr)   |
| <i>sol.k_2_43</i> | multiplier | 0.850       | 1.150       | HRU 43 soil layer 2 saturated hydraulic conductivity (mm/hr)   |
| <i>sol.k_2_44</i> | multiplier | 0.850       | 1.150       | HRU 44 soil layer 2 saturated hydraulic conductivity (mm/hr)   |
| <i>sol.k_2_45</i> | multiplier | 0.850       | 1.150       | HRU 45 soil layer 2 saturated hydraulic conductivity (mm/hr)   |
| <i>sol.k_2_46</i> | multiplier | 0.850       | 1.150       | HRU 46 soil layer 2 saturated hydraulic conductivity (mm/hr)   |
| <i>sol.k_2_47</i> | multiplier | 0.850       | 1.150       | HRU 47 soil layer 2 saturated hydraulic conductivity (mm/hr)   |
| <i>sol.k_2_r</i>  | multiplier | 1.000       | 5.000       | subbasin soil layer 2 saturated hydraulic conductivity (mm/hr) |
| <i>sol.k_3_01</i> | multiplier | 0.850       | 1.150       | HRU 01 soil layer 3 saturated hydraulic conductivity (mm/hr)   |
| <i>sol.k_3_02</i> | multiplier | 0.850       | 1.150       | HRU 02 soil layer 3 saturated hydraulic conductivity (mm/hr)   |

Continued on next page



| Parameter           | Type       | Lower Bound | Upper Bound | Description (with units if applicable)                         |
|---------------------|------------|-------------|-------------|----------------------------------------------------------------|
| <i>sol.k_3_44</i>   | multiplier | 0.850       | 1.150       | HRU 44 soil layer 3 saturated hydraulic conductivity (mm/hr)   |
| <i>sol.k_3_45</i>   | multiplier | 0.850       | 1.150       | HRU 45 soil layer 3 saturated hydraulic conductivity (mm/hr)   |
| <i>sol.k_3_46</i>   | multiplier | 0.850       | 1.150       | HRU 46 soil layer 3 saturated hydraulic conductivity (mm/hr)   |
| <i>sol.k_3_47</i>   | multiplier | 0.850       | 1.150       | HRU 47 soil layer 3 saturated hydraulic conductivity (mm/hr)   |
| <i>sol.k_3_r</i>    | multiplier | 1.000       | 5.000       | subbasin soil layer 3 saturated hydraulic conductivity (mm/hr) |
| <i>sol.thk_1_01</i> | multiplier | 0.850       | 1.150       | HRU 01 soil layer 1 thickness (mm)                             |
| <i>sol.thk_1_02</i> | multiplier | 0.850       | 1.150       | HRU 02 soil layer 1 thickness (mm)                             |
| <i>sol.thk_1_03</i> | multiplier | 0.850       | 1.150       | HRU 03 soil layer 1 thickness (mm)                             |
| <i>sol.thk_1_04</i> | multiplier | 0.850       | 1.150       | HRU 04 soil layer 1 thickness (mm)                             |
| <i>sol.thk_1_05</i> | multiplier | 0.850       | 1.150       | HRU 05 soil layer 1 thickness (mm)                             |
| <i>sol.thk_1_06</i> | multiplier | 0.850       | 1.150       | HRU 06 soil layer 1 thickness (mm)                             |
| <i>sol.thk_1_07</i> | multiplier | 0.850       | 1.150       | HRU 07 soil layer 1 thickness (mm)                             |
| <i>sol.thk_1_08</i> | multiplier | 0.850       | 1.150       | HRU 08 soil layer 1 thickness (mm)                             |
| <i>sol.thk_1_09</i> | multiplier | 0.850       | 1.150       | HRU 09 soil layer 1 thickness (mm)                             |
| <i>sol.thk_1_10</i> | multiplier | 0.850       | 1.150       | HRU 10 soil layer 1 thickness (mm)                             |
| <i>sol.thk_1_11</i> | multiplier | 0.850       | 1.150       | HRU 11 soil layer 1 thickness (mm)                             |
| <i>sol.thk_1_12</i> | multiplier | 0.850       | 1.150       | HRU 12 soil layer 1 thickness (mm)                             |
| <i>sol.thk_1_13</i> | multiplier | 0.850       | 1.150       | HRU 13 soil layer 1 thickness (mm)                             |
| <i>sol.thk_1_14</i> | multiplier | 0.850       | 1.150       | HRU 14 soil layer 1 thickness (mm)                             |
| <i>sol.thk_1_15</i> | multiplier | 0.850       | 1.150       | HRU 15 soil layer 1 thickness (mm)                             |
| <i>sol.thk_1_16</i> | multiplier | 0.850       | 1.150       | HRU 16 soil layer 1 thickness (mm)                             |
| <i>sol.thk_1_17</i> | multiplier | 0.850       | 1.150       | HRU 17 soil layer 1 thickness (mm)                             |
| <i>sol.thk_1_18</i> | multiplier | 0.850       | 1.150       | HRU 18 soil layer 1 thickness (mm)                             |
| <i>sol.thk_1_19</i> | multiplier | 0.850       | 1.150       | HRU 19 soil layer 1 thickness (mm)                             |
| <i>sol.thk_1_20</i> | multiplier | 0.850       | 1.150       | HRU 20 soil layer 1 thickness (mm)                             |
| <i>sol.thk_1_21</i> | multiplier | 0.850       | 1.150       | HRU 21 soil layer 1 thickness (mm)                             |
| <i>sol.thk_1_22</i> | multiplier | 0.850       | 1.150       | HRU 22 soil layer 1 thickness (mm)                             |
| <i>sol.thk_1_23</i> | multiplier | 0.850       | 1.150       | HRU 23 soil layer 1 thickness (mm)                             |
| <i>sol.thk_1_24</i> | multiplier | 0.850       | 1.150       | HRU 24 soil layer 1 thickness (mm)                             |
| <i>sol.thk_1_25</i> | multiplier | 0.850       | 1.150       | HRU 25 soil layer 1 thickness (mm)                             |
| <i>sol.thk_1_26</i> | multiplier | 0.850       | 1.150       | HRU 26 soil layer 1 thickness (mm)                             |
| <i>sol.thk_1_27</i> | multiplier | 0.850       | 1.150       | HRU 27 soil layer 1 thickness (mm)                             |
| <i>sol.thk_1_28</i> | multiplier | 0.850       | 1.150       | HRU 28 soil layer 1 thickness (mm)                             |
| <i>sol.thk_1_29</i> | multiplier | 0.850       | 1.150       | HRU 29 soil layer 1 thickness (mm)                             |
| <i>sol.thk_1_30</i> | multiplier | 0.850       | 1.150       | HRU 30 soil layer 1 thickness (mm)                             |
| <i>sol.thk_1_31</i> | multiplier | 0.850       | 1.150       | HRU 31 soil layer 1 thickness (mm)                             |
| <i>sol.thk_1_32</i> | multiplier | 0.850       | 1.150       | HRU 32 soil layer 1 thickness (mm)                             |
| <i>sol.thk_1_33</i> | multiplier | 0.850       | 1.150       | HRU 33 soil layer 1 thickness (mm)                             |
| <i>sol.thk_1_34</i> | multiplier | 0.850       | 1.150       | HRU 34 soil layer 1 thickness (mm)                             |
| <i>sol.thk_1_35</i> | multiplier | 0.850       | 1.150       | HRU 35 soil layer 1 thickness (mm)                             |
| <i>sol.thk_1_36</i> | multiplier | 0.850       | 1.150       | HRU 36 soil layer 1 thickness (mm)                             |

Continued on next page

| Parameter           | Type       | Lower Bound | Upper Bound | Description (with units if applicable) |
|---------------------|------------|-------------|-------------|----------------------------------------|
| <i>sol.thk_1_37</i> | multiplier | 0.850       | 1.150       | HRU 37 soil layer 1 thickness (mm)     |
| <i>sol.thk_1_38</i> | multiplier | 0.850       | 1.150       | HRU 38 soil layer 1 thickness (mm)     |
| <i>sol.thk_1_39</i> | multiplier | 0.850       | 1.150       | HRU 39 soil layer 1 thickness (mm)     |
| <i>sol.thk_1_40</i> | multiplier | 0.850       | 1.150       | HRU 40 soil layer 1 thickness (mm)     |
| <i>sol.thk_1_41</i> | multiplier | 0.850       | 1.150       | HRU 41 soil layer 1 thickness (mm)     |
| <i>sol.thk_1_42</i> | multiplier | 0.850       | 1.150       | HRU 42 soil layer 1 thickness (mm)     |
| <i>sol.thk_1_43</i> | multiplier | 0.850       | 1.150       | HRU 43 soil layer 1 thickness (mm)     |
| <i>sol.thk_1_44</i> | multiplier | 0.850       | 1.150       | HRU 44 soil layer 1 thickness (mm)     |
| <i>sol.thk_1_45</i> | multiplier | 0.850       | 1.150       | HRU 45 soil layer 1 thickness (mm)     |
| <i>sol.thk_1_46</i> | multiplier | 0.850       | 1.150       | HRU 46 soil layer 1 thickness (mm)     |
| <i>sol.thk_1_47</i> | multiplier | 0.850       | 1.150       | HRU 47 soil layer 1 thickness (mm)     |
| <i>sol.thk_2_01</i> | multiplier | 0.850       | 1.150       | HRU 01 soil layer 2 thickness (mm)     |
| <i>sol.thk_2_02</i> | multiplier | 0.850       | 1.150       | HRU 02 soil layer 2 thickness (mm)     |
| <i>sol.thk_2_03</i> | multiplier | 0.850       | 1.150       | HRU 03 soil layer 2 thickness (mm)     |
| <i>sol.thk_2_04</i> | multiplier | 0.850       | 1.150       | HRU 04 soil layer 2 thickness (mm)     |
| <i>sol.thk_2_05</i> | multiplier | 0.850       | 1.150       | HRU 05 soil layer 2 thickness (mm)     |
| <i>sol.thk_2_06</i> | multiplier | 0.850       | 1.150       | HRU 06 soil layer 2 thickness (mm)     |
| <i>sol.thk_2_07</i> | multiplier | 0.850       | 1.150       | HRU 07 soil layer 2 thickness (mm)     |
| <i>sol.thk_2_08</i> | multiplier | 0.850       | 1.150       | HRU 08 soil layer 2 thickness (mm)     |
| <i>sol.thk_2_09</i> | multiplier | 0.850       | 1.150       | HRU 09 soil layer 2 thickness (mm)     |
| <i>sol.thk_2_10</i> | multiplier | 0.850       | 1.150       | HRU 10 soil layer 2 thickness (mm)     |
| <i>sol.thk_2_11</i> | multiplier | 0.850       | 1.150       | HRU 11 soil layer 2 thickness (mm)     |
| <i>sol.thk_2_12</i> | multiplier | 0.850       | 1.150       | HRU 12 soil layer 2 thickness (mm)     |
| <i>sol.thk_2_13</i> | multiplier | 0.850       | 1.150       | HRU 13 soil layer 2 thickness (mm)     |
| <i>sol.thk_2_14</i> | multiplier | 0.850       | 1.150       | HRU 14 soil layer 2 thickness (mm)     |
| <i>sol.thk_2_15</i> | multiplier | 0.850       | 1.150       | HRU 15 soil layer 2 thickness (mm)     |
| <i>sol.thk_2_16</i> | multiplier | 0.850       | 1.150       | HRU 16 soil layer 2 thickness (mm)     |
| <i>sol.thk_2_17</i> | multiplier | 0.850       | 1.150       | HRU 17 soil layer 2 thickness (mm)     |
| <i>sol.thk_2_18</i> | multiplier | 0.850       | 1.150       | HRU 18 soil layer 2 thickness (mm)     |
| <i>sol.thk_2_19</i> | multiplier | 0.850       | 1.150       | HRU 19 soil layer 2 thickness (mm)     |
| <i>sol.thk_2_20</i> | multiplier | 0.850       | 1.150       | HRU 20 soil layer 2 thickness (mm)     |
| <i>sol.thk_2_21</i> | multiplier | 0.850       | 1.150       | HRU 21 soil layer 2 thickness (mm)     |
| <i>sol.thk_2_22</i> | multiplier | 0.850       | 1.150       | HRU 22 soil layer 2 thickness (mm)     |
| <i>sol.thk_2_23</i> | multiplier | 0.850       | 1.150       | HRU 23 soil layer 2 thickness (mm)     |
| <i>sol.thk_2_24</i> | multiplier | 0.850       | 1.150       | HRU 24 soil layer 2 thickness (mm)     |
| <i>sol.thk_2_25</i> | multiplier | 0.850       | 1.150       | HRU 25 soil layer 2 thickness (mm)     |
| <i>sol.thk_2_26</i> | multiplier | 0.850       | 1.150       | HRU 26 soil layer 2 thickness (mm)     |
| <i>sol.thk_2_27</i> | multiplier | 0.850       | 1.150       | HRU 27 soil layer 2 thickness (mm)     |
| <i>sol.thk_2_28</i> | multiplier | 0.850       | 1.150       | HRU 28 soil layer 2 thickness (mm)     |
| <i>sol.thk_2_29</i> | multiplier | 0.850       | 1.150       | HRU 29 soil layer 2 thickness (mm)     |
| <i>sol.thk_2_30</i> | multiplier | 0.850       | 1.150       | HRU 30 soil layer 2 thickness (mm)     |

Continued on next page

| Parameter           | Type       | Lower Bound | Upper Bound | Description (with units if applicable) |
|---------------------|------------|-------------|-------------|----------------------------------------|
| <i>sol.thk_2_31</i> | multiplier | 0.850       | 1.150       | HRU 31 soil layer 2 thickness (mm)     |
| <i>sol.thk_2_32</i> | multiplier | 0.850       | 1.150       | HRU 32 soil layer 2 thickness (mm)     |
| <i>sol.thk_2_33</i> | multiplier | 0.850       | 1.150       | HRU 33 soil layer 2 thickness (mm)     |
| <i>sol.thk_2_34</i> | multiplier | 0.850       | 1.150       | HRU 34 soil layer 2 thickness (mm)     |
| <i>sol.thk_2_35</i> | multiplier | 0.850       | 1.150       | HRU 35 soil layer 2 thickness (mm)     |
| <i>sol.thk_2_36</i> | multiplier | 0.850       | 1.150       | HRU 36 soil layer 2 thickness (mm)     |
| <i>sol.thk_2_37</i> | multiplier | 0.850       | 1.150       | HRU 37 soil layer 2 thickness (mm)     |
| <i>sol.thk_2_38</i> | multiplier | 0.850       | 1.150       | HRU 38 soil layer 2 thickness (mm)     |
| <i>sol.thk_2_39</i> | multiplier | 0.850       | 1.150       | HRU 39 soil layer 2 thickness (mm)     |
| <i>sol.thk_2_40</i> | multiplier | 0.850       | 1.150       | HRU 40 soil layer 2 thickness (mm)     |
| <i>sol.thk_2_41</i> | multiplier | 0.850       | 1.150       | HRU 41 soil layer 2 thickness (mm)     |
| <i>sol.thk_2_42</i> | multiplier | 0.850       | 1.150       | HRU 42 soil layer 2 thickness (mm)     |
| <i>sol.thk_2_43</i> | multiplier | 0.850       | 1.150       | HRU 43 soil layer 2 thickness (mm)     |
| <i>sol.thk_2_44</i> | multiplier | 0.850       | 1.150       | HRU 44 soil layer 2 thickness (mm)     |
| <i>sol.thk_2_45</i> | multiplier | 0.850       | 1.150       | HRU 45 soil layer 2 thickness (mm)     |
| <i>sol.thk_2_46</i> | multiplier | 0.850       | 1.150       | HRU 46 soil layer 2 thickness (mm)     |
| <i>sol.thk_2_47</i> | multiplier | 0.850       | 1.150       | HRU 47 soil layer 2 thickness (mm)     |
| <i>sol.thk_3_01</i> | multiplier | 0.850       | 1.150       | HRU 01 soil layer 3 thickness (mm)     |
| <i>sol.thk_3_02</i> | multiplier | 0.850       | 1.150       | HRU 02 soil layer 3 thickness (mm)     |
| <i>sol.thk_3_03</i> | multiplier | 0.850       | 1.150       | HRU 03 soil layer 3 thickness (mm)     |
| <i>sol.thk_3_04</i> | multiplier | 0.850       | 1.150       | HRU 04 soil layer 3 thickness (mm)     |
| <i>sol.thk_3_05</i> | multiplier | 0.850       | 1.150       | HRU 05 soil layer 3 thickness (mm)     |
| <i>sol.thk_3_06</i> | multiplier | 0.850       | 1.150       | HRU 06 soil layer 3 thickness (mm)     |
| <i>sol.thk_3_07</i> | multiplier | 0.850       | 1.150       | HRU 07 soil layer 3 thickness (mm)     |
| <i>sol.thk_3_08</i> | multiplier | 0.850       | 1.150       | HRU 08 soil layer 3 thickness (mm)     |
| <i>sol.thk_3_09</i> | multiplier | 0.850       | 1.150       | HRU 09 soil layer 3 thickness (mm)     |
| <i>sol.thk_3_10</i> | multiplier | 0.850       | 1.150       | HRU 10 soil layer 3 thickness (mm)     |
| <i>sol.thk_3_11</i> | multiplier | 0.850       | 1.150       | HRU 11 soil layer 3 thickness (mm)     |
| <i>sol.thk_3_12</i> | multiplier | 0.850       | 1.150       | HRU 12 soil layer 3 thickness (mm)     |
| <i>sol.thk_3_13</i> | multiplier | 0.850       | 1.150       | HRU 13 soil layer 3 thickness (mm)     |
| <i>sol.thk_3_14</i> | multiplier | 0.850       | 1.150       | HRU 14 soil layer 3 thickness (mm)     |
| <i>sol.thk_3_15</i> | multiplier | 0.850       | 1.150       | HRU 15 soil layer 3 thickness (mm)     |
| <i>sol.thk_3_16</i> | multiplier | 0.850       | 1.150       | HRU 16 soil layer 3 thickness (mm)     |
| <i>sol.thk_3_17</i> | multiplier | 0.850       | 1.150       | HRU 17 soil layer 3 thickness (mm)     |
| <i>sol.thk_3_18</i> | multiplier | 0.850       | 1.150       | HRU 18 soil layer 3 thickness (mm)     |
| <i>sol.thk_3_19</i> | multiplier | 0.850       | 1.150       | HRU 19 soil layer 3 thickness (mm)     |
| <i>sol.thk_3_20</i> | multiplier | 0.850       | 1.150       | HRU 20 soil layer 3 thickness (mm)     |
| <i>sol.thk_3_21</i> | multiplier | 0.850       | 1.150       | HRU 21 soil layer 3 thickness (mm)     |
| <i>sol.thk_3_22</i> | multiplier | 0.850       | 1.150       | HRU 22 soil layer 3 thickness (mm)     |
| <i>sol.thk_3_23</i> | multiplier | 0.850       | 1.150       | HRU 23 soil layer 3 thickness (mm)     |
| <i>sol.thk_3_24</i> | multiplier | 0.850       | 1.150       | HRU 24 soil layer 3 thickness (mm)     |

Continued on next page

| Parameter           | Type       | Lower Bound | Upper Bound | Description (with units if applicable) |
|---------------------|------------|-------------|-------------|----------------------------------------|
| <i>sol.thk_3_25</i> | multiplier | 0.850       | 1.150       | HRU 25 soil layer 3 thickness (mm)     |
| <i>sol.thk_3_26</i> | multiplier | 0.850       | 1.150       | HRU 26 soil layer 3 thickness (mm)     |
| <i>sol.thk_3_27</i> | multiplier | 0.850       | 1.150       | HRU 27 soil layer 3 thickness (mm)     |
| <i>sol.thk_3_28</i> | multiplier | 0.850       | 1.150       | HRU 28 soil layer 3 thickness (mm)     |
| <i>sol.thk_3_29</i> | multiplier | 0.850       | 1.150       | HRU 29 soil layer 3 thickness (mm)     |
| <i>sol.thk_3_30</i> | multiplier | 0.850       | 1.150       | HRU 30 soil layer 3 thickness (mm)     |
| <i>sol.thk_3_31</i> | multiplier | 0.850       | 1.150       | HRU 31 soil layer 3 thickness (mm)     |
| <i>sol.thk_3_32</i> | multiplier | 0.850       | 1.150       | HRU 32 soil layer 3 thickness (mm)     |
| <i>sol.thk_3_33</i> | multiplier | 0.850       | 1.150       | HRU 33 soil layer 3 thickness (mm)     |
| <i>sol.thk_3_34</i> | multiplier | 0.850       | 1.150       | HRU 34 soil layer 3 thickness (mm)     |
| <i>sol.thk_3_35</i> | multiplier | 0.850       | 1.150       | HRU 35 soil layer 3 thickness (mm)     |
| <i>sol.thk_3_36</i> | multiplier | 0.850       | 1.150       | HRU 36 soil layer 3 thickness (mm)     |
| <i>sol.thk_3_37</i> | multiplier | 0.850       | 1.150       | HRU 37 soil layer 3 thickness (mm)     |
| <i>sol.thk_3_38</i> | multiplier | 0.850       | 1.150       | HRU 38 soil layer 3 thickness (mm)     |
| <i>sol.thk_3_39</i> | multiplier | 0.850       | 1.150       | HRU 39 soil layer 3 thickness (mm)     |
| <i>sol.thk_3_40</i> | multiplier | 0.850       | 1.150       | HRU 40 soil layer 3 thickness (mm)     |
| <i>sol.thk_3_41</i> | multiplier | 0.850       | 1.150       | HRU 41 soil layer 3 thickness (mm)     |
| <i>sol.thk_3_42</i> | multiplier | 0.850       | 1.150       | HRU 42 soil layer 3 thickness (mm)     |
| <i>sol.thk_3_43</i> | multiplier | 0.850       | 1.150       | HRU 43 soil layer 3 thickness (mm)     |
| <i>sol.thk_3_44</i> | multiplier | 0.850       | 1.150       | HRU 44 soil layer 3 thickness (mm)     |
| <i>sol.thk_3_45</i> | multiplier | 0.850       | 1.150       | HRU 45 soil layer 3 thickness (mm)     |
| <i>sol.thk_3_46</i> | multiplier | 0.850       | 1.150       | HRU 46 soil layer 3 thickness (mm)     |
| <i>sol.thk_3_47</i> | multiplier | 0.850       | 1.150       | HRU 47 soil layer 3 thickness (mm)     |
| <i>surlag_01</i>    | multiplier | 0.850       | 1.150       | HRU 01 surface runoff lag coefficient  |
| <i>surlag_02</i>    | multiplier | 0.850       | 1.150       | HRU 02 surface runoff lag coefficient  |
| <i>surlag_03</i>    | multiplier | 0.850       | 1.150       | HRU 03 surface runoff lag coefficient  |
| <i>surlag_04</i>    | multiplier | 0.850       | 1.150       | HRU 04 surface runoff lag coefficient  |
| <i>surlag_05</i>    | multiplier | 0.850       | 1.150       | HRU 05 surface runoff lag coefficient  |
| <i>surlag_06</i>    | multiplier | 0.850       | 1.150       | HRU 06 surface runoff lag coefficient  |
| <i>surlag_07</i>    | multiplier | 0.850       | 1.150       | HRU 07 surface runoff lag coefficient  |
| <i>surlag_08</i>    | multiplier | 0.850       | 1.150       | HRU 08 surface runoff lag coefficient  |
| <i>surlag_09</i>    | multiplier | 0.850       | 1.150       | HRU 09 surface runoff lag coefficient  |
| <i>surlag_10</i>    | multiplier | 0.850       | 1.150       | HRU 10 surface runoff lag coefficient  |
| <i>surlag_11</i>    | multiplier | 0.850       | 1.150       | HRU 11 surface runoff lag coefficient  |
| <i>surlag_12</i>    | multiplier | 0.850       | 1.150       | HRU 12 surface runoff lag coefficient  |
| <i>surlag_13</i>    | multiplier | 0.850       | 1.150       | HRU 13 surface runoff lag coefficient  |
| <i>surlag_14</i>    | multiplier | 0.850       | 1.150       | HRU 14 surface runoff lag coefficient  |
| <i>surlag_15</i>    | multiplier | 0.850       | 1.150       | HRU 15 surface runoff lag coefficient  |
| <i>surlag_16</i>    | multiplier | 0.850       | 1.150       | HRU 16 surface runoff lag coefficient  |
| <i>surlag_17</i>    | multiplier | 0.850       | 1.150       | HRU 17 surface runoff lag coefficient  |
| <i>surlag_18</i>    | multiplier | 0.850       | 1.150       | HRU 18 surface runoff lag coefficient  |

Continued on next page



| Parameter        | Type       | Lower Bound | Upper Bound | Description (with units if applicable)                          |
|------------------|------------|-------------|-------------|-----------------------------------------------------------------|
| <i>surlag_19</i> | multiplier | 0.850       | 1.150       | HRU 19 surface runoff lag coefficient                           |
| <i>surlag_20</i> | multiplier | 0.850       | 1.150       | HRU 20 surface runoff lag coefficient                           |
| <i>surlag_21</i> | multiplier | 0.850       | 1.150       | HRU 21 surface runoff lag coefficient                           |
| <i>surlag_22</i> | multiplier | 0.850       | 1.150       | HRU 22 surface runoff lag coefficient                           |
| <i>surlag_23</i> | multiplier | 0.850       | 1.150       | HRU 23 surface runoff lag coefficient                           |
| <i>surlag_24</i> | multiplier | 0.850       | 1.150       | HRU 24 surface runoff lag coefficient                           |
| <i>surlag_25</i> | multiplier | 0.850       | 1.150       | HRU 25 surface runoff lag coefficient                           |
| <i>surlag_26</i> | multiplier | 0.850       | 1.150       | HRU 26 surface runoff lag coefficient                           |
| <i>surlag_27</i> | multiplier | 0.850       | 1.150       | HRU 27 surface runoff lag coefficient                           |
| <i>surlag_28</i> | multiplier | 0.850       | 1.150       | HRU 28 surface runoff lag coefficient                           |
| <i>surlag_29</i> | multiplier | 0.850       | 1.150       | HRU 29 surface runoff lag coefficient                           |
| <i>surlag_30</i> | multiplier | 0.850       | 1.150       | HRU 30 surface runoff lag coefficient                           |
| <i>surlag_31</i> | multiplier | 0.850       | 1.150       | HRU 31 surface runoff lag coefficient                           |
| <i>surlag_32</i> | multiplier | 0.850       | 1.150       | HRU 32 surface runoff lag coefficient                           |
| <i>surlag_33</i> | multiplier | 0.850       | 1.150       | HRU 33 surface runoff lag coefficient                           |
| <i>surlag_34</i> | multiplier | 0.850       | 1.150       | HRU 34 surface runoff lag coefficient                           |
| <i>surlag_35</i> | multiplier | 0.850       | 1.150       | HRU 35 surface runoff lag coefficient                           |
| <i>surlag_36</i> | multiplier | 0.850       | 1.150       | HRU 36 surface runoff lag coefficient                           |
| <i>surlag_37</i> | multiplier | 0.850       | 1.150       | HRU 37 surface runoff lag coefficient                           |
| <i>surlag_38</i> | multiplier | 0.850       | 1.150       | HRU 38 surface runoff lag coefficient                           |
| <i>surlag_39</i> | multiplier | 0.850       | 1.150       | HRU 39 surface runoff lag coefficient                           |
| <i>surlag_40</i> | multiplier | 0.850       | 1.150       | HRU 40 surface runoff lag coefficient                           |
| <i>surlag_41</i> | multiplier | 0.850       | 1.150       | HRU 41 surface runoff lag coefficient                           |
| <i>surlag_42</i> | multiplier | 0.850       | 1.150       | HRU 42 surface runoff lag coefficient                           |
| <i>surlag_43</i> | multiplier | 0.850       | 1.150       | HRU 43 surface runoff lag coefficient                           |
| <i>surlag_44</i> | multiplier | 0.850       | 1.150       | HRU 44 surface runoff lag coefficient                           |
| <i>surlag_45</i> | multiplier | 0.850       | 1.150       | HRU 45 surface runoff lag coefficient                           |
| <i>surlag_46</i> | multiplier | 0.850       | 1.150       | HRU 46 surface runoff lag coefficient                           |
| <i>surlag_47</i> | multiplier | 0.850       | 1.150       | HRU 47 surface runoff lag coefficient                           |
| <i>surlag_v</i>  | value      | 2.000       | 12.000      | subbasin surface runoff lag coefficient                         |
| <i>topt_frzd</i> | value      | 15.000      | 45.000      | subbasin decidous forest optimal growth temp( $^{\circ}$ C)     |
| <i>topt_frse</i> | value      | 15.000      | 45.000      | subbasin evergreen forest optimal growth temp( $^{\circ}$ C)    |
| <i>topt_rnge</i> | value      | 12.500      | 37.500      | subbasin rangeland optimal growth temp( $^{\circ}$ C)           |
| <i>trnsrch_v</i> | value      | 0.500       | 0.980       | subbasin deep aquifer fraction main channel transmission losses |

Supplementart Material: Table S2. The five most influential parameters for QOIs and conditioning measures from the method of Morris analysis.

- pretreatment ET-precipitation ratio:
  - *pcp\_3\_2002*: 2002 75th to 100th quantile precip
  - *esco\_v*: subbasin soil evaporation compensation factor
  - *pcp\_3\_2003*: 2003 75th to 100th quantile precip
  - *alaimin\_frse*: subbasin evergreen forest dormant min leaf area index
  - *pcp\_2\_2002*: 2002 50th to 75th quantile precip
- pretreatment discharge-precipitation ratio:
  - *cn2\_r*: subbasin soil moisture condition II curve number
  - *pcp\_3\_2002*: 2002 75th to 100th quantile precip
  - *gw\_revap\_v*: subbasin groundwater 'revap' coefficient
  - *sbsubsn\_r*: subbasin average slope length (m)
  - *trnsrch\_v*: subbasin deep aquifer fraction main channel transmission losses
- post-treatment ET-precipitation ratio:
  - *esco\_v*: subbasin soil evaporation compensation factor
  - *pcp\_3\_2007*: 2007 75th to 100th quantile precip
  - *pcp\_3\_2010*: 2010 75th to 100th quantile precip
  - *alaimin\_frse*: subbasin evergreen forest dormant min leaf area index
  - *canmxfac\_15*: rangeland fraction of max canopy storage
- post-treatment discharge-precipitation ratio:
  - *cn2\_r*: subbasin soil moisture condition II curve number
  - *trnsrch\_v*: subbasin deep aquifer fraction main channel transmission losses
  - *gw\_revap\_v*: subbasin groundwater 'revap' coefficient
  - *sbsubsn\_r*: subbasin average slope length (m)
  - *pcp\_3\_2007*: 2007 75th to 100th quantile precip
- post-treatment ET difference ratio:
  - *canmxfac\_15*: rangeland fraction of max canopy storage
  - *alaimin\_frse*: subbasin evergreen forest dormant min leaf area index
  - *pcp\_3\_2006*: 2006 75th to 100th quantile precip
  - *canmx\_20*: hru 20 max canopy storage for evergreen forest (mm)
  - *canmx\_22*: hru 22 max canopy storage for evergreen forest (mm)
- Nash-Sutcliffe efficiency:

- *cn2\_r*: subbasin soil moisture condition II curve number
- *pcp\_3\_2002*: 2002 75th to 100th quantile precip
- *cn2\_20*: hru 20 soil moisture condition II curve number
- *cn2\_18*: hru 18 soil moisture condition II curve number
- *cn2\_22*: hru 22 soil moisture condition II curve number
- correlation coefficient:
  - *cn2\_r*: subbasin soil moisture condition II curve number
  - *sbsubsn\_r*: subbasin average slope length (m)
  - *pcp\_3\_2002*: 2002 75th to 100th quantile precip
  - *cn2\_20*: hru 20 soil moisture condition II curve number
  - *cn2\_07*: hru 7 soil moisture condition II curve number
- percent bias:
  - *cn2\_r*: subbasin soil moisture condition II curve number
  - *pcp\_3\_2002*: 2002 75th to 100th quantile precip
  - *gw\_revap\_v*: subbasin groundwater 'revap' coefficient
  - *trnsrch\_v*: subbasin deep aquifer fraction main channel transmission losses
  - *sbsubsn\_r*: subbasin average slope length (m)

Supplementart Material: Table S3. Summary of method of Morris results showing the mean dimensionless sensitivity of the parameters to the conditioning measures and QOIs.

| control file name | pretreat ET-precip ratio | pretreat discharge-precip ratio | post-treat precip ratio | ET- | post-treat discharge-precip ratio | post-treat ET ratio | diff | NSE           |
|-------------------|--------------------------|---------------------------------|-------------------------|-----|-----------------------------------|---------------------|------|---------------|
| alaimin_frsl      | 1.633370e-02             | -1.578970e-03                   | 2.183980e-02            |     | -2.688410e-03                     | -9.884980e-04       |      | 9.080190e-02  |
| alaimin_frse      | 7.688140e-02             | -5.204550e-03                   | 7.627450e-02            |     | -8.309500e-03                     | 2.907040e-02        |      | 3.314940e-01  |
| alaimin_rnge      | 1.131420e-02             | -2.338250e-03                   | 1.398910e-02            |     | -2.674140e-03                     | -1.857440e-04       |      | 5.471230e-02  |
| alpha_bf_01       | 0.000000e+00             | 3.606090e-05                    | 0.000000e+00            |     | 1.315060e-05                      | 0.000000e+00        |      | -1.998010e-02 |
| alpha_bf_02       | 0.000000e+00             | 5.448720e-07                    | 0.000000e+00            |     | 3.044870e-07                      | 0.000000e+00        |      | -6.410260e-08 |
| alpha_bf_03       | 0.000000e+00             | 2.339740e-06                    | 0.000000e+00            |     | 1.137820e-06                      | 0.000000e+00        |      | 2.198720e-05  |
| alpha_bf_04       | 0.000000e+00             | -9.615390e-08                   | 0.000000e+00            |     | 4.487180e-08                      | 0.000000e+00        |      | 4.112700e-14  |
| alpha_bf_05       | 0.000000e+00             | 4.615380e-06                    | 0.000000e+00            |     | 9.679480e-07                      | 0.000000e+00        |      | -5.160270e-06 |
| alpha_bf_06       | 0.000000e+00             | 2.019230e-06                    | 0.000000e+00            |     | 3.205130e-06                      | 0.000000e+00        |      | 2.275640e-05  |
| alpha_bf_07       | 0.000000e+00             | 6.538460e-06                    | 0.000000e+00            |     | 2.570510e-06                      | 0.000000e+00        |      | 4.307690e-05  |
| alpha_bf_08       | 0.000000e+00             | 3.205120e-08                    | 0.000000e+00            |     | 4.487180e-08                      | 0.000000e+00        |      | 2.083330e-06  |
| alpha_bf_09       | 0.000000e+00             | 1.602560e-07                    | 0.000000e+00            |     | 9.935900e-08                      | 0.000000e+00        |      | 2.147440e-06  |
| alpha_bf_10       | 0.000000e+00             | 6.410260e-08                    | 0.000000e+00            |     | 1.185900e-07                      | 0.000000e+00        |      | -8.974360e-07 |
| alpha_bf_11       | 0.000000e+00             | 1.570510e-06                    | 0.000000e+00            |     | 4.358970e-07                      | 0.000000e+00        |      | -3.750000e-06 |
| alpha_bf_12       | 0.000000e+00             | 2.948720e-06                    | 0.000000e+00            |     | 1.980770e-06                      | 0.000000e+00        |      | -5.403850e-05 |
| alpha_bf_13       | 0.000000e+00             | 1.410260e-06                    | 0.000000e+00            |     | 5.032050e-07                      | 0.000000e+00        |      | -2.051280e-06 |
| alpha_bf_14       | 0.000000e+00             | -1.282050e-07                   | 0.000000e+00            |     | 6.089750e-08                      | 0.000000e+00        |      | 3.141030e-06  |
| alpha_bf_15       | 0.000000e+00             | 3.205130e-08                    | 0.000000e+00            |     | -9.615390e-09                     | 0.000000e+00        |      | 2.692310e-06  |
| alpha_bf_16       | 0.000000e+00             | 2.243590e-07                    | 0.000000e+00            |     | 1.346150e-07                      | 0.000000e+00        |      | -1.282050e-06 |
| alpha_bf_17       | 0.000000e+00             | 9.935900e-07                    | 0.000000e+00            |     | 3.942310e-07                      | 0.000000e+00        |      | -1.282050e-07 |
| alpha_bf_18       | 0.000000e+00             | 5.993590e-06                    | 0.000000e+00            |     | 3.599360e-06                      | 0.000000e+00        |      | -9.125000e-05 |
| alpha_bf_19       | 0.000000e+00             | -1.634620e-06                   | 0.000000e+00            |     | 1.246800e-06                      | 0.000000e+00        |      | 3.631410e-05  |

Continued on next page

| control file name | pretreat ET-precip ratio | pretreat discharge-precip ratio | post-treat precip ratio | ET- | post-treat discharge-precip ratio | post-treat ET ratio | diff | NSE           |
|-------------------|--------------------------|---------------------------------|-------------------------|-----|-----------------------------------|---------------------|------|---------------|
| alpha_bf_20       | 0.000000e+00             | 1.528850e-05                    | 0.000000e+00            |     | 8.413460e-06                      | 0.000000e+00        |      | 1.340380e-04  |
| alpha_bf_21       | 0.000000e+00             | 7.179490e-06                    | 0.000000e+00            |     | 6.304490e-06                      | 0.000000e+00        |      | -1.181090e-04 |
| alpha_bf_22       | 0.000000e+00             | 3.717950e-06                    | 0.000000e+00            |     | 2.871790e-06                      | 0.000000e+00        |      | 4.698720e-05  |
| alpha_bf_23       | 0.000000e+00             | -4.487180e-07                   | 0.000000e+00            |     | 7.820510e-07                      | 0.000000e+00        |      | 1.839740e-05  |
| alpha_bf_24       | 0.000000e+00             | 3.301280e-06                    | 0.000000e+00            |     | -2.205130e-06                     | 0.000000e+00        |      | 2.342950e-05  |
| alpha_bf_25       | 0.000000e+00             | 4.807700e-07                    | 0.000000e+00            |     | 9.903850e-07                      | 0.000000e+00        |      | 5.608970e-06  |
| alpha_bf_26       | 0.000000e+00             | 0.000000e+00                    | 0.000000e+00            |     | 6.089740e-08                      | 0.000000e+00        |      | 0.000000e+00  |
| alpha_bf_27       | 0.000000e+00             | 2.692310e-06                    | 0.000000e+00            |     | 8.782050e-07                      | 0.000000e+00        |      | 2.009620e-05  |
| alpha_bf_28       | 0.000000e+00             | 2.564100e-07                    | 0.000000e+00            |     | 6.538460e-07                      | 0.000000e+00        |      | -3.525640e-07 |
| alpha_bf_29       | 0.000000e+00             | -9.615380e-08                   | 0.000000e+00            |     | 1.282050e-08                      | 0.000000e+00        |      | 9.615370e-08  |
| alpha_bf_30       | 0.000000e+00             | 1.602560e-07                    | 0.000000e+00            |     | 5.128210e-08                      | 0.000000e+00        |      | -2.564100e-07 |
| alpha_bf_31       | 0.000000e+00             | -3.205130e-08                   | 0.000000e+00            |     | 8.012820e-08                      | 0.000000e+00        |      | 2.243590e-07  |
| alpha_bf_32       | 0.000000e+00             | 1.660260e-05                    | 0.000000e+00            |     | 2.314100e-06                      | 0.000000e+00        |      | -7.160260e-05 |
| alpha_bf_33       | 0.000000e+00             | 1.240380e-05                    | 0.000000e+00            |     | 6.480770e-06                      | 0.000000e+00        |      | -4.016030e-05 |
| alpha_bf_34       | 0.000000e+00             | 2.371790e-05                    | 0.000000e+00            |     | 3.048080e-06                      | 0.000000e+00        |      | -1.431410e-04 |
| alpha_bf_35       | 0.000000e+00             | 1.602560e-07                    | 0.000000e+00            |     | 1.858970e-07                      | 0.000000e+00        |      | -9.294870e-06 |
| alpha_bf_36       | 0.000000e+00             | 6.730770e-07                    | 0.000000e+00            |     | 3.814100e-07                      | 0.000000e+00        |      | -1.153850e-06 |
| alpha_bf_37       | 0.000000e+00             | -1.602560e-07                   | 0.000000e+00            |     | -4.487180e-08                     | 0.000000e+00        |      | 1.858970e-06  |
| alpha_bf_38       | 0.000000e+00             | 1.378210e-06                    | 0.000000e+00            |     | 9.487180e-07                      | 0.000000e+00        |      | -5.673080e-06 |
| alpha_bf_39       | 0.000000e+00             | -2.243590e-07                   | 0.000000e+00            |     | 5.224360e-07                      | 0.000000e+00        |      | -2.435900e-06 |
| alpha_bf_40       | 0.000000e+00             | -1.282050e-07                   | 0.000000e+00            |     | 1.634620e-07                      | 0.000000e+00        |      | -2.179490e-06 |
| alpha_bf_41       | 0.000000e+00             | 4.447990e-18                    | 0.000000e+00            |     | 2.339740e-07                      | 0.000000e+00        |      | 5.769230e-07  |

Continued on next page

| control file name | pretreat ET-precip ratio | pretreat discharge-precip ratio | post-treat precip ratio | ET- | post-treat discharge-precip ratio | post-treat ET ratio | diff | NSE           |
|-------------------|--------------------------|---------------------------------|-------------------------|-----|-----------------------------------|---------------------|------|---------------|
| alpha_bf_42       | 0.000000e+00             | 3.846150e-07                    | 0.000000e+00            |     | 4.967950e-07                      | 0.000000e+00        |      | -1.121800e-06 |
| alpha_bf_43       | 0.000000e+00             | 6.410260e-08                    | 0.000000e+00            |     | 7.179490e-07                      | 0.000000e+00        |      | -2.756410e-06 |
| alpha_bf_44       | 0.000000e+00             | -1.923080e-07                   | 0.000000e+00            |     | 1.698720e-07                      | 0.000000e+00        |      | 1.602560e-07  |
| alpha_bf_45       | 0.000000e+00             | -6.410250e-08                   | 0.000000e+00            |     | 1.570510e-07                      | 0.000000e+00        |      | 2.948720e-06  |
| alpha_bf_46       | 0.000000e+00             | -3.205130e-08                   | 0.000000e+00            |     | 1.442310e-07                      | 0.000000e+00        |      | 3.365390e-06  |
| alpha_bf_47       | 0.000000e+00             | -1.089740e-06                   | 0.000000e+00            |     | 2.564100e-07                      | 0.000000e+00        |      | 3.589740e-06  |
| alpha_bf_v        | 0.000000e+00             | 3.573290e-04                    | 0.000000e+00            |     | 9.449520e-05                      | 0.000000e+00        |      | -4.048560e-02 |
| blai_frsd         | -1.774630e-03            | 1.420670e-04                    | -2.538560e-03           |     | 3.647450e-04                      | 1.137110e-04        |      | -9.404360e-03 |
| blai_frse         | -8.193830e-03            | 4.825800e-04                    | -7.951580e-03           |     | 7.894550e-04                      | -4.309940e-03       |      | -4.753940e-02 |
| blai_rnge         | -1.007950e-03            | 2.529830e-04                    | -1.489570e-03           |     | 3.503840e-04                      | 1.834500e-05        |      | -6.836620e-03 |
| canmx_01          | 1.598080e-04             | -1.982690e-05                   | 2.570830e-04            |     | -2.073080e-05                     | -6.750300e-06       |      | 1.287340e-03  |
| canmx_02          | 2.996150e-04             | -1.801600e-05                   | 4.296150e-04            |     | -3.010580e-05                     | 6.524860e-06        |      | 1.809230e-03  |
| canmx_03          | 1.329740e-03             | -8.894230e-06                   | 1.786570e-03            |     | 5.400650e-06                      | -5.077050e-05       |      | 6.061280e-03  |
| canmx_04          | 4.378200e-05             | -6.608970e-06                   | 6.865380e-05            |     | -1.020190e-05                     | -4.474960e-06       |      | 3.651280e-04  |
| canmx_05          | 1.423210e-03             | -1.418850e-04                   | 1.997630e-03            |     | -2.884130e-04                     | -1.217310e-04       |      | 8.150550e-03  |
| canmx_06          | 1.510900e-03             | -1.647020e-04                   | 2.126860e-03            |     | -4.017280e-04                     | -5.891050e-05       |      | 9.217500e-03  |
| canmx_07          | 2.022310e-03             | -3.387720e-04                   | 2.907690e-03            |     | -4.945770e-04                     | -1.572780e-04       |      | 1.897430e-02  |
| canmx_08          | 1.958330e-05             | -1.589740e-06                   | 4.679490e-05            |     | -2.958330e-06                     | -4.955240e-06       |      | 1.297120e-04  |
| canmx_09          | 4.554490e-05             | -7.275640e-06                   | 9.233970e-05            |     | -1.009620e-05                     | -2.021610e-05       |      | 3.964100e-04  |
| canmx_10          | 1.798080e-05             | -1.464740e-06                   | 3.073720e-05            |     | -3.509620e-06                     | -6.680350e-06       |      | 4.858970e-05  |
| canmx_11          | 2.771790e-04             | -1.230070e-12                   | 3.875960e-04            |     | -2.628530e-05                     | -5.795250e-05       |      | 9.798720e-04  |
| canmx_12          | 5.972440e-04             | -3.126600e-05                   | 9.432050e-04            |     | -7.464420e-05                     | -1.431200e-04       |      | 3.578810e-03  |

Continued on next page



CT

| control file name | pretreat ET-precip ratio | pretreat discharge-precip ratio | post-treat precip ratio | ET- | post-treat discharge-precip ratio | post-treat ET ratio | diff | NSE           |
|-------------------|--------------------------|---------------------------------|-------------------------|-----|-----------------------------------|---------------------|------|---------------|
| canmx_13          | 4.517630e-04             | -1.265700e-05                   | 6.907050e-04            |     | -3.324040e-05                     | -3.974490e-05       |      | 2.620800e-03  |
| canmx_14          | 2.883970e-04             | -1.039100e-05                   | 4.710900e-04            |     | -4.482050e-05                     | -5.113410e-05       |      | 8.566350e-04  |
| canmx_15          | 3.480770e-05             | -2.666670e-06                   | 6.189100e-05            |     | -5.016030e-06                     | 1.848490e-06        |      | 1.441030e-04  |
| canmx_16          | 1.417310e-04             | -2.012820e-06                   | 1.769870e-04            |     | -7.887820e-06                     | -2.330510e-05       |      | 5.340060e-04  |
| canmx_17          | 4.826600e-04             | -1.305130e-05                   | 6.844230e-04            |     | -6.946800e-05                     | -4.094100e-05       |      | 6.054490e-04  |
| canmx_18          | 5.173010e-03             | 1.243110e-04                    | 3.147080e-03            |     | -1.616730e-04                     | 4.902150e-03        |      | 1.328770e-02  |
| canmx_19          | 1.416600e-03             | -1.754810e-05                   | 2.061760e-03            |     | -1.863910e-04                     | -1.564350e-04       |      | 2.700800e-03  |
| canmx_20          | 7.482560e-03             | -5.424010e-04                   | 4.704620e-03            |     | -6.076310e-04                     | 7.295540e-03        |      | 4.016720e-02  |
| canmx_21          | 3.177280e-03             | -2.265160e-04                   | 4.655510e-03            |     | -5.923880e-04                     | -2.493660e-04       |      | 2.280900e-02  |
| canmx_22          | 5.384810e-03             | -4.366380e-04                   | 3.459710e-03            |     | -4.823910e-04                     | 5.427910e-03        |      | 3.303950e-02  |
| canmx_23          | 6.152880e-04             | -6.226920e-05                   | 9.170190e-04            |     | -1.221220e-04                     | -7.644580e-05       |      | 2.862920e-03  |
| canmx_24          | 1.034360e-03             | -8.143270e-05                   | 1.428010e-03            |     | -1.789580e-04                     | -1.202560e-05       |      | 6.012890e-03  |
| canmx_25          | 8.957690e-04             | -5.618270e-05                   | 1.357210e-03            |     | -1.825930e-04                     | -7.829680e-05       |      | 4.693490e-03  |
| canmx_26          | 1.121790e-05             | 4.647440e-07                    | 1.259620e-05            |     | -2.217950e-06                     | -1.934290e-06       |      | -3.237180e-06 |
| canmx_27          | 6.116030e-04             | -1.679490e-05                   | 9.250960e-04            |     | -1.318300e-04                     | 6.566030e-06        |      | 1.075670e-03  |
| canmx_28          | 2.716990e-04             | -2.555130e-05                   | 4.522440e-04            |     | -9.440060e-05                     | -9.510890e-06       |      | 9.551920e-04  |
| canmx_29          | 1.602560e-06             | 9.935890e-08                    | 4.423080e-06            |     | -1.538460e-07                     | 2.367310e-06        |      | 1.602570e-06  |
| canmx_30          | 1.891030e-06             | -1.057690e-07                   | 6.987180e-06            |     | -9.294870e-08                     | 7.116670e-06        |      | 5.673080e-06  |
| canmx_31          | 2.185900e-05             | -2.371800e-07                   | 3.849360e-05            |     | -2.355770e-06                     | 4.696150e-06        |      | 9.262820e-05  |
| canmx_32          | 4.108300e-03             | -6.888780e-05                   | 2.519710e-03            |     | -7.832370e-05                     | 4.280900e-03        |      | 1.018200e-02  |
| canmx_33          | 2.232720e-03             | -3.578210e-05                   | 3.247530e-03            |     | -1.259650e-04                     | -1.064660e-04       |      | 5.902120e-03  |
| canmx_34          | 3.929260e-03             | 9.252890e-05                    | 5.662760e-03            |     | -1.922720e-04                     | -2.562160e-04       |      | 1.053530e-02  |

Continued on next page

9

| control file name | pretreat ET-precip ratio | pretreat discharge-precip ratio | post-treat precip ratio | ET- | post-treat discharge-precip ratio | post-treat ET ratio | diff | NSE           |
|-------------------|--------------------------|---------------------------------|-------------------------|-----|-----------------------------------|---------------------|------|---------------|
| canmx_35          | 3.890710e-04             | -2.745510e-05                   | 4.647120e-04            |     | -8.300640e-05                     | 6.717310e-06        |      | 1.852280e-03  |
| canmx_36          | 2.036860e-04             | -3.607050e-05                   | 2.307370e-04            |     | -2.767310e-05                     | -1.007440e-05       |      | 1.166280e-03  |
| canmx_37          | 6.535260e-05             | -1.031090e-05                   | 5.836540e-05            |     | -7.378200e-06                     | 1.249390e-05        |      | 4.221150e-04  |
| canmx_38          | 1.193330e-03             | -1.660800e-04                   | 1.553210e-03            |     | -1.006630e-04                     | -1.226320e-04       |      | 1.073730e-02  |
| canmx_39          | 2.688140e-04             | -4.697440e-05                   | 3.641990e-04            |     | -3.780770e-05                     | 2.176600e-06        |      | 2.709550e-03  |
| canmx_40          | 1.466030e-04             | -2.110900e-05                   | 1.683650e-04            |     | -1.611540e-05                     | -7.884560e-07       |      | 1.053720e-03  |
| canmx_41          | 9.448720e-05             | -1.622760e-05                   | 1.175000e-04            |     | -2.235260e-05                     | -1.394260e-05       |      | 3.048720e-04  |
| canmx_42          | 2.685580e-04             | -4.988460e-05                   | 3.342950e-04            |     | -8.720510e-05                     | -7.638480e-06       |      | 1.197180e-03  |
| canmx_43          | 2.885900e-04             | -5.915380e-05                   | 3.920510e-04            |     | -1.046060e-04                     | -6.874780e-05       |      | 1.880160e-03  |
| canmx_44          | 3.852560e-05             | -1.044550e-05                   | 4.663460e-05            |     | -1.322760e-05                     | 6.112180e-06        |      | 1.792950e-04  |
| canmx_45          | 9.320510e-05             | -1.708970e-05                   | 1.168910e-04            |     | -2.725000e-05                     | -1.576280e-06       |      | 2.454810e-04  |
| canmx_46          | 2.916670e-05             | -6.621790e-06                   | 4.298080e-05            |     | -7.266030e-06                     | -9.438460e-06       |      | 2.336860e-04  |
| canmx_47          | 1.586860e-04             | -4.102370e-04                   | 2.265380e-04            |     | -2.300740e-04                     | -1.293720e-05       |      | 1.786960e-03  |
| canmx_v           | 3.638840e-03             | -3.598170e-04                   | 4.032250e-03            |     | -6.610630e-04                     | 1.511920e-03        |      | 2.679670e-02  |
| canmxfac.07       | 1.432320e-02             | -2.039770e-03                   | 2.151300e-02            |     | -3.982340e-03                     | -6.916940e-04       |      | 1.369770e-01  |
| canmxfac.15       | 1.408120e-02             | -2.716290e-03                   | 7.995260e-02            |     | -1.293380e-02                     | -7.613840e-02       |      | 8.170840e-02  |
| ch_k2_r           | 0.000000e+00             | -7.898480e-03                   | 0.000000e+00            |     | -6.575910e-03                     | 0.000000e+00        |      | 1.227870e-01  |
| ch_n2_r           | 0.000000e+00             | -6.726690e-04                   | 0.000000e+00            |     | -5.097660e-04                     | 0.000000e+00        |      | 5.464500e-02  |
| cn2_01            | -7.352560e-05            | 3.416630e-04                    | -1.466030e-04           |     | 2.587440e-04                      | -7.221150e-06       |      | -2.734520e-02 |
| cn2_02            | -1.066670e-04            | 8.550100e-04                    | -1.883650e-04           |     | 4.143170e-04                      | -1.956470e-05       |      | -2.247690e-02 |
| cn2_03            | -5.338780e-04            | 3.419790e-03                    | -9.897110e-04           |     | 2.090280e-03                      | -5.103530e-06       |      | -1.380400e-01 |
| cn2_04            | -9.487180e-06            | 1.306630e-04                    | -3.669870e-05           |     | 8.092630e-05                      | 3.931730e-06        |      | -8.675380e-03 |

Continued on next page

7

| control file name | pretreat ET-precip ratio | pretreat discharge-precip ratio | post-treat precip ratio | ET- | post-treat discharge-precip ratio | post-treat ET ratio | diff | NSE           |
|-------------------|--------------------------|---------------------------------|-------------------------|-----|-----------------------------------|---------------------|------|---------------|
| cn2_05            | -4.973080e-04            | 5.115260e-03                    | -1.472630e-03           |     | 4.363300e-03                      | 9.505100e-05        |      | -1.345020e-01 |
| cn2_06            | -3.668590e-04            | 6.578040e-03                    | -1.015540e-03           |     | 4.287900e-03                      | 5.504420e-05        |      | -3.268620e-01 |
| cn2_07            | -5.173720e-04            | 7.931530e-03                    | -1.774200e-03           |     | 5.820350e-03                      | 1.433320e-04        |      | -4.538380e-01 |
| cn2_08            | -1.003210e-05            | 1.307630e-04                    | -2.657050e-05           |     | 7.124360e-05                      | -4.507370e-06       |      | -4.764130e-03 |
| cn2_09            | -1.445510e-05            | 2.047500e-04                    | -6.304490e-05           |     | 1.314170e-04                      | 4.532060e-07        |      | -5.123690e-03 |
| cn2_10            | -4.583330e-06            | 6.884290e-05                    | -1.948720e-05           |     | 3.744550e-05                      | 3.515060e-06        |      | -4.115170e-03 |
| cn2_11            | -3.105770e-05            | 5.251700e-04                    | -1.046470e-04           |     | 4.103650e-04                      | 1.891990e-05        |      | -4.539290e-02 |
| cn2_12            | -7.516020e-05            | 1.269190e-03                    | -2.316030e-04           |     | 8.608590e-04                      | 1.608240e-05        |      | -1.311910e-01 |
| cn2_13            | -4.435900e-05            | 1.237460e-03                    | -1.691030e-04           |     | 7.171250e-04                      | 3.415000e-05        |      | -1.328960e-01 |
| cn2_14            | -1.671150e-04            | 7.289810e-04                    | -3.986860e-04           |     | 7.468140e-04                      | 3.879680e-05        |      | -7.798070e-02 |
| cn2_15            | -2.221150e-05            | 1.137720e-04                    | -5.282050e-05           |     | 1.086630e-04                      | -6.178530e-06       |      | -1.087320e-02 |
| cn2_16            | -5.096150e-05            | 3.564940e-04                    | -1.440060e-04           |     | 3.038400e-04                      | 1.369870e-05        |      | -4.692250e-02 |
| cn2_17            | -6.179490e-05            | 1.057760e-03                    | -2.304810e-04           |     | 5.945030e-04                      | 2.343690e-05        |      | -9.073800e-02 |
| cn2_18            | -1.683400e-03            | 8.452160e-03                    | -3.719420e-03           |     | 8.328750e-03                      | 1.672840e-03        |      | -1.124910e+00 |
| cn2_19            | -1.559300e-04            | 2.195280e-03                    | -4.162180e-04           |     | 1.149850e-03                      | 3.183400e-05        |      | -2.676240e-01 |
| cn2_20            | -1.764040e-03            | 2.378500e-02                    | -7.068330e-03           |     | 2.022080e-02                      | 3.962130e-03        |      | -1.695710e+00 |
| cn2_21            | -1.449260e-03            | 1.025130e-02                    | -3.760740e-03           |     | 9.004220e-03                      | 2.807560e-04        |      | -7.043990e-01 |
| cn2_22            | -1.807790e-03            | 1.917120e-02                    | -6.016920e-03           |     | 1.610520e-02                      | 3.251780e-03        |      | -1.555210e+00 |
| cn2_23            | -2.259940e-04            | 1.968170e-03                    | -4.392630e-04           |     | 1.090090e-03                      | 3.624680e-06        |      | -9.861620e-02 |
| cn2_24            | -3.213780e-04            | 2.430910e-03                    | -7.651600e-04           |     | 1.573620e-03                      | 7.412180e-06        |      | -1.435070e-01 |
| cn2_25            | -3.469870e-04            | 2.344880e-03                    | -6.825960e-04           |     | 1.321860e-03                      | 5.158460e-05        |      | -1.462830e-01 |
| cn2_26            | -6.185900e-06            | 1.982690e-05                    | -8.333330e-06           |     | 1.906090e-05                      | -3.303530e-06       |      | -7.437500e-04 |

Continued on next page

∞

| control file name | pretreat ET-precip ratio | pretreat discharge-precip ratio | post-treat precip ratio | ET- | post-treat discharge-precip ratio | post-treat ET ratio | diff | NSE           |
|-------------------|--------------------------|---------------------------------|-------------------------|-----|-----------------------------------|---------------------|------|---------------|
| cn2_27            | -3.635900e-04            | 1.908350e-03                    | -6.115060e-04           |     | 1.216440e-03                      | 4.312950e-05        |      | -9.281070e-02 |
| cn2_28            | -6.618590e-05            | 7.713210e-04                    | -1.123400e-04           |     | 3.047530e-04                      | 2.934200e-05        |      | -4.831010e-02 |
| cn2_29            | 0.000000e+00             | 2.371790e-06                    | -2.403850e-06           |     | 3.935900e-06                      | 1.755450e-06        |      | -1.174360e-04 |
| cn2_30            | -1.666670e-06            | 1.804490e-05                    | -3.269230e-06           |     | 1.279170e-05                      | 1.761860e-06        |      | -1.202820e-03 |
| cn2_31            | -3.493590e-06            | 5.483970e-05                    | -8.974360e-06           |     | 2.580130e-05                      | 4.429490e-06        |      | -1.025310e-02 |
| cn2_32            | -3.676920e-04            | 7.642160e-03                    | -1.305510e-03           |     | 5.376740e-03                      | 6.069660e-04        |      | -1.250810e+00 |
| cn2_33            | -1.836540e-04            | 5.018640e-03                    | -7.092950e-04           |     | 3.574620e-03                      | 1.518940e-05        |      | -6.672250e-01 |
| cn2_34            | -4.541670e-04            | 8.366960e-03                    | -1.012240e-03           |     | 6.381410e-03                      | 1.080250e-04        |      | -1.382740e+00 |
| cn2_35            | -3.097440e-04            | 1.656890e-03                    | -6.775640e-04           |     | 1.138290e-03                      | 4.823400e-05        |      | -1.039810e-01 |
| cn2_36            | -7.641020e-05            | 9.913940e-04                    | -1.123080e-04           |     | 3.679870e-04                      | 4.371820e-07        |      | -8.072780e-02 |
| cn2_37            | -4.320510e-05            | 2.099970e-04                    | -9.493590e-05           |     | 1.428880e-04                      | 2.109940e-05        |      | -1.074810e-02 |
| cn2_38            | -7.502880e-04            | 4.832330e-03                    | -1.658010e-03           |     | 3.066070e-03                      | 6.826890e-05        |      | -2.283980e-01 |
| cn2_39            | -1.338460e-04            | 1.121640e-03                    | -3.525000e-04           |     | 6.866540e-04                      | 2.683460e-05        |      | -5.698200e-02 |
| cn2_40            | -6.907050e-05            | 5.612530e-04                    | -1.704170e-04           |     | 3.679130e-04                      | -2.244650e-05       |      | -2.995130e-02 |
| cn2_41            | -7.762820e-05            | 4.786440e-04                    | -1.438780e-04           |     | 3.497980e-04                      | 3.196160e-06        |      | -8.944620e-03 |
| cn2_42            | -2.278530e-04            | 1.397500e-03                    | -3.943590e-04           |     | 9.623590e-04                      | -1.152720e-05       |      | -3.561760e-02 |
| cn2_43            | -2.625960e-04            | 1.787180e-03                    | -4.755770e-04           |     | 1.079960e-03                      | 5.395640e-05        |      | -5.360300e-02 |
| cn2_44            | -4.006410e-05            | 2.818080e-04                    | -6.298080e-05           |     | 1.549780e-04                      | 2.333650e-06        |      | -9.147560e-03 |
| cn2_45            | -7.519230e-05            | 5.286060e-04                    | -1.590710e-04           |     | 3.324740e-04                      | 2.650740e-05        |      | -9.469390e-03 |
| cn2_46            | -1.608970e-05            | 9.969870e-05                    | -2.262820e-05           |     | 6.065380e-05                      | 7.285900e-06        |      | -1.038090e-02 |
| cn2_47            | -4.192310e-05            | 6.441990e-04                    | -1.109620e-04           |     | 4.100540e-04                      | 1.423650e-05        |      | -6.313430e-02 |
| cn2_r             | -2.291770e-02            | 3.598770e-01                    | -6.506100e-02           |     | 2.558000e-01                      | 1.825830e-02        |      | -3.140290e+01 |

Continued on next page

| control file name | pretreat ET-precip ratio | pretreat discharge-precip ratio | post-treat precip ratio | ET- | post-treat discharge-precip ratio | post-treat ET ratio | diff | NSE           |
|-------------------|--------------------------|---------------------------------|-------------------------|-----|-----------------------------------|---------------------|------|---------------|
| cncoef_r          | -4.101150e-04            | 5.455590e-03                    | -8.441630e-04           |     | 9.193120e-03                      | 2.713080e-04        |      | 6.289940e-03  |
| dlai_frsd         | 0.000000e+00             | 0.000000e+00                    | 0.000000e+00            |     | 0.000000e+00                      | 0.000000e+00        |      | 0.000000e+00  |
| dlai_frse         | 0.000000e+00             | 0.000000e+00                    | 0.000000e+00            |     | 0.000000e+00                      | 0.000000e+00        |      | 0.000000e+00  |
| dlai_rnge         | 1.186900e-03             | -3.504370e-04                   | 1.020030e-03            |     | -2.708050e-04                     | -2.198650e-04       |      | 1.376770e-02  |
| dorm_hr_v         | -1.825530e-04            | 1.049180e-05                    | -1.860070e-04           |     | 7.885700e-05                      | 6.263550e-05        |      | 4.151240e-04  |
| epco_01           | 3.176280e-05             | 1.496790e-06                    | 4.935900e-06            |     | 1.474360e-07                      | 9.779490e-06        |      | -2.216600e-04 |
| epco_02           | 7.211540e-06             | 4.903850e-07                    | 1.137820e-05            |     | -2.240390e-06                     | -8.036860e-06       |      | -1.837180e-04 |
| epco_03           | 4.942310e-05             | -3.160260e-06                   | 1.775640e-05            |     | -7.339740e-06                     | 2.709710e-05        |      | -1.117950e-04 |
| epco_04           | -8.333330e-07            | -1.282050e-07                   | 1.250000e-06            |     | -5.673080e-07                     | 3.028850e-07        |      | 0.000000e+00  |
| epco_05           | 1.482370e-04             | 1.538450e-06                    | 2.431730e-04            |     | -3.689420e-05                     | -1.644810e-05       |      | -3.000670e-03 |
| epco_06           | 2.892310e-04             | 1.095510e-05                    | 3.596470e-04            |     | -6.015070e-05                     | -8.037120e-05       |      | -1.227990e-02 |
| epco_07           | 4.823080e-04             | -4.650320e-05                   | 4.563460e-04            |     | -5.983330e-05                     | -1.252050e-04       |      | -2.060890e-03 |
| epco_08           | 5.064100e-06             | 5.384620e-07                    | 3.012820e-06            |     | -7.788460e-07                     | -8.897430e-07       |      | -2.701600e-05 |
| epco_09           | 7.692310e-06             | -2.073720e-06                   | 3.012820e-06            |     | -1.442310e-06                     | 5.250000e-06        |      | 1.573400e-05  |
| epco_10           | -2.339740e-06            | -1.615390e-06                   | -1.602570e-07           |     | 2.884620e-08                      | -6.326920e-07       |      | 3.477240e-05  |
| epco_11           | 2.310900e-05             | -3.682690e-06                   | 4.608970e-05            |     | -5.397440e-06                     | -5.583010e-06       |      | 9.785250e-05  |
| epco_12           | 1.071790e-04             | 1.679810e-05                    | 1.208970e-04            |     | -1.356410e-05                     | -2.903240e-05       |      | -6.090650e-03 |
| epco_13           | 8.384620e-05             | -1.075960e-05                   | 9.814100e-05            |     | -1.933010e-05                     | -4.690770e-05       |      | 3.330770e-04  |
| epco_14           | 4.391030e-05             | -2.439100e-06                   | 1.788460e-05            |     | -3.673080e-06                     | 2.415830e-05        |      | -2.685900e-05 |
| epco_15           | 1.346150e-06             | -9.294870e-08                   | 1.923080e-07            |     | 3.141030e-07                      | 4.113140e-06        |      | 0.000000e+00  |
| epco_16           | 1.496800e-05             | -6.826920e-07                   | 1.025640e-05            |     | -1.891030e-06                     | -8.878240e-08       |      | -9.541670e-05 |
| epco_17           | 1.009620e-05             | 5.641020e-07                    | 7.756410e-06            |     | -1.942310e-06                     | 1.458810e-05        |      | -3.141670e-05 |

Continued on next page

| control file name | pretreat ET-precip ratio | pretreat discharge-precip ratio | post-treat precip ratio | ET- | post-treat discharge-precip ratio | post-treat ET ratio | diff | NSE           |
|-------------------|--------------------------|---------------------------------|-------------------------|-----|-----------------------------------|---------------------|------|---------------|
| epco_18           | 1.783650e-04             | -4.294870e-06                   | 2.017950e-04            |     | -3.019870e-05                     | -6.876730e-05       |      | -5.962790e-03 |
| epco_19           | 4.458330e-05             | -4.285260e-06                   | 4.032050e-05            |     | -8.743590e-06                     | -8.645520e-06       |      | 1.169870e-05  |
| epco_20           | 1.078210e-03             | -1.459330e-04                   | 1.102240e-03            |     | -2.543040e-04                     | 7.611700e-05        |      | -6.869560e-03 |
| epco_21           | 5.251280e-04             | 2.721790e-05                    | 5.372120e-04            |     | -7.825000e-05                     | 3.491150e-05        |      | -9.113960e-03 |
| epco_22           | 9.251920e-04             | -1.244100e-04                   | 7.737500e-04            |     | -1.666380e-04                     | 8.532210e-05        |      | -1.505100e-03 |
| epco_23           | 1.400640e-05             | -1.628200e-06                   | 4.246790e-05            |     | -1.081410e-05                     | 1.798400e-06        |      | 8.538140e-05  |
| epco_24           | 3.554490e-05             | -3.817310e-06                   | 5.759620e-05            |     | -4.006410e-06                     | 4.285900e-06        |      | -8.367950e-05 |
| epco_25           | 3.602560e-05             | -1.233330e-05                   | 5.875000e-05            |     | -1.743590e-06                     | -9.584290e-06       |      | 3.029190e-03  |
| epco_26           | 8.012820e-07             | 0.000000e+00                    | 1.057690e-06            |     | 0.000000e+00                      | -9.634620e-07       |      | 0.000000e+00  |
| epco_27           | 2.807690e-05             | 5.538460e-06                    | 1.750000e-05            |     | 2.852570e-07                      | 1.467560e-05        |      | -3.683780e-04 |
| epco_28           | 1.057690e-06             | 2.948720e-07                    | 7.467950e-06            |     | -4.294870e-07                     | -5.544860e-07       |      | -1.025640e-05 |
| epco_29           | -3.205130e-07            | 0.000000e+00                    | 1.923080e-07            |     | -3.205130e-09                     | -1.205130e-06       |      | 0.000000e+00  |
| epco_30           | -1.282050e-07            | -3.205130e-08                   | 9.294870e-07            |     | -3.205130e-09                     | -1.045830e-06       |      | 0.000000e+00  |
| epco_31           | 8.782050e-06             | 7.467950e-07                    | 1.185900e-06            |     | -6.378200e-07                     | 7.376600e-06        |      | -7.371470e-05 |
| epco_32           | 3.309290e-04             | -3.128850e-05                   | 4.223720e-04            |     | -6.529170e-05                     | 5.237500e-06        |      | -2.413980e-03 |
| epco_33           | 2.437180e-04             | 4.394230e-05                    | 3.020190e-04            |     | -2.683970e-05                     | -6.011630e-05       |      | -1.367060e-02 |
| epco_34           | 3.212180e-04             | 4.565710e-05                    | 4.846470e-04            |     | -8.058970e-05                     | -2.871480e-06       |      | -1.859720e-02 |
| epco_35           | 4.519230e-05             | 8.692310e-06                    | 6.772440e-05            |     | -7.663460e-06                     | 7.878850e-06        |      | -2.811680e-03 |
| epco_36           | 1.865390e-05             | 1.512820e-06                    | 3.227560e-05            |     | -7.407050e-06                     | -1.230900e-05       |      | -1.195580e-04 |
| epco_37           | 1.076920e-05             | -1.086540e-06                   | 7.692310e-06            |     | -1.971150e-06                     | 8.531410e-06        |      | 6.556740e-05  |
| epco_38           | 4.990380e-05             | -2.499360e-05                   | 9.147440e-05            |     | -1.522760e-05                     | -2.440960e-05       |      | 6.070350e-04  |
| epco_39           | 3.673080e-05             | -4.346150e-06                   | 2.012820e-05            |     | -5.410260e-06                     | -6.592950e-06       |      | 1.547180e-04  |

Continued on next page

| control file name | pretreat ET-precip ratio | pretreat discharge-precip ratio | post-treat precip ratio | ET- | post-treat discharge-precip ratio | post-treat ET ratio | diff | NSE           |
|-------------------|--------------------------|---------------------------------|-------------------------|-----|-----------------------------------|---------------------|------|---------------|
| epco_40           | 2.333330e-05             | -5.993590e-07                   | -5.929490e-06           |     | -1.262820e-06                     | 1.842310e-05        |      | -2.025640e-05 |
| epco_41           | 2.298080e-05             | -1.147440e-05                   | -2.243590e-06           |     | -1.471150e-06                     | 2.560540e-05        |      | 4.407400e-04  |
| epco_42           | 3.189100e-05             | 2.259620e-06                    | 2.490380e-05            |     | -8.141020e-07                     | 5.255130e-06        |      | 3.100960e-05  |
| epco_43           | 4.721150e-05             | 1.367630e-05                    | 3.333330e-05            |     | -7.227560e-06                     | 2.968590e-06        |      | -2.770060e-04 |
| epco_44           | 1.137820e-05             | 3.589750e-07                    | 3.910260e-06            |     | -7.532050e-07                     | 3.825960e-06        |      | -7.571160e-05 |
| epco_45           | 3.541670e-05             | -1.144230e-06                   | 1.012820e-05            |     | -2.243590e-06                     | -1.386220e-06       |      | 7.685930e-06  |
| epco_46           | -1.089750e-06            | 1.592950e-06                    | 3.493590e-06            |     | -1.291670e-06                     | 3.837180e-06        |      | -8.271160e-05 |
| epco_47           | 5.445510e-05             | 1.015380e-05                    | 5.532050e-05            |     | -3.195510e-06                     | -4.515060e-06       |      | -1.405770e-05 |
| epco_v            | 6.590160e-03             | -2.847420e-04                   | 6.917310e-03            |     | -1.074240e-03                     | 2.067590e-04        |      | -7.809500e-02 |
| esco_01           | -9.794230e-04            | -3.737180e-06                   | -8.904490e-04           |     | 6.721800e-05                      | 6.086600e-05        |      | 6.215960e-03  |
| esco_02           | -2.281380e-03            | 1.870450e-04                    | -2.396350e-03           |     | 3.734970e-04                      | 4.788750e-05        |      | 7.494570e-03  |
| esco_03           | -9.393330e-03            | 3.878400e-04                    | -1.003140e-02           |     | 1.281620e-03                      | 3.733590e-04        |      | 5.149350e-02  |
| esco_04           | -4.216030e-04            | 3.614100e-05                    | -4.921470e-04           |     | 5.591020e-05                      | 1.615800e-05        |      | -1.257210e-03 |
| esco_05           | -4.938780e-03            | 7.490670e-04                    | -5.783490e-03           |     | 8.571510e-04                      | 1.013090e-04        |      | -1.450500e-02 |
| esco_06           | -6.156350e-03            | 4.363970e-04                    | -7.066510e-03           |     | 9.334490e-04                      | 1.675050e-04        |      | 4.427100e-02  |
| esco_07           | -8.646190e-03            | 1.225920e-03                    | -1.008000e-02           |     | 1.543450e-03                      | 3.455010e-04        |      | 6.853940e-03  |
| esco_08           | -1.560580e-04            | 2.169550e-05                    | -1.566990e-04           |     | 2.931090e-05                      | 4.229550e-05        |      | -9.669870e-04 |
| esco_09           | -3.555130e-04            | 3.956090e-05                    | -2.998720e-04           |     | 6.675000e-05                      | 4.011120e-05        |      | -1.553780e-03 |
| esco_10           | -9.349360e-05            | 1.194550e-05                    | -7.426280e-05           |     | 1.725000e-05                      | -2.385580e-05       |      | -5.660260e-04 |
| esco_11           | -1.512120e-03            | 2.065960e-04                    | -1.633140e-03           |     | 2.416090e-04                      | 5.083240e-05        |      | -7.918530e-03 |
| esco_12           | -3.028590e-03            | 4.186510e-04                    | -3.587530e-03           |     | 4.761410e-04                      | 6.301990e-05        |      | -8.865960e-03 |
| esco_13           | -2.347950e-03            | 3.580550e-04                    | -2.658370e-03           |     | 4.289010e-04                      | 1.386280e-04        |      | -1.349030e-02 |

Continued on next page

| control file name | pretreat ET-precip ratio | pretreat discharge-precip ratio | post-treat precip ratio | ET- | post-treat discharge-precip ratio | post-treat ET ratio | diff | NSE           |
|-------------------|--------------------------|---------------------------------|-------------------------|-----|-----------------------------------|---------------------|------|---------------|
| esco_14           | -1.647080e-03            | -1.537600e-04                   | -1.587080e-03           |     | 7.006730e-05                      | 5.010160e-05        |      | 4.540340e-02  |
| esco_15           | -1.856090e-04            | 4.333330e-06                    | -2.022760e-04           |     | 1.525000e-05                      | 2.367660e-05        |      | 1.648400e-04  |
| esco_16           | -5.244870e-04            | 3.791990e-05                    | -5.141350e-04           |     | 6.290380e-05                      | 7.147120e-06        |      | -1.717600e-03 |
| esco_17           | -3.362370e-03            | 1.953140e-04                    | -3.609040e-03           |     | 4.532370e-04                      | 1.510210e-04        |      | 5.311090e-03  |
| esco_18           | -3.609370e-02            | 4.191860e-03                    | -3.649320e-02           |     | 6.418830e-03                      | -1.063630e-03       |      | 1.113300e-01  |
| esco_19           | -1.056280e-02            | 3.635420e-04                    | -1.165550e-02           |     | 1.387230e-03                      | 4.783050e-04        |      | 7.133820e-02  |
| esco_20           | -2.781130e-02            | 5.486290e-03                    | -2.704250e-02           |     | 5.376380e-03                      | -2.246220e-03       |      | -1.240410e-01 |
| esco_21           | -1.240500e-02            | 7.328080e-04                    | -1.357830e-02           |     | 1.461840e-03                      | 5.028500e-04        |      | 1.164560e-01  |
| esco_22           | -1.983790e-02            | 3.508110e-03                    | -1.988080e-02           |     | 2.906470e-03                      | -1.750000e-03       |      | -7.155150e-02 |
| esco_23           | -3.438880e-03            | 1.327790e-04                    | -3.054290e-03           |     | 4.767560e-04                      | 9.648110e-05        |      | 6.553500e-03  |
| esco_24           | -5.767690e-03            | 1.232310e-04                    | -5.332950e-03           |     | 7.299680e-04                      | 3.043560e-04        |      | 3.356100e-02  |
| esco_25           | -4.861730e-03            | -2.869070e-04                   | -4.581510e-03           |     | 4.331540e-04                      | 1.774090e-04        |      | 7.034540e-02  |
| esco_26           | -3.503210e-05            | 1.641030e-06                    | -4.445510e-05           |     | 3.394230e-06                      | 2.064810e-05        |      | 2.051920e-04  |
| esco_27           | -3.191280e-03            | 2.694780e-04                    | -2.810580e-03           |     | 5.369330e-04                      | 1.095070e-04        |      | -5.259840e-03 |
| esco_28           | -1.429390e-03            | -2.981730e-05                   | -1.319810e-03           |     | 1.235060e-04                      | 6.116410e-05        |      | 6.103180e-03  |
| esco_29           | -4.326920e-06            | 2.564100e-07                    | -1.964740e-05           |     | 1.445510e-06                      | 3.223720e-06        |      | 1.634620e-06  |
| esco_30           | -3.663460e-05            | 1.192310e-06                    | -3.233970e-05           |     | 1.916670e-06                      | 3.381410e-06        |      | -8.269230e-06 |
| esco_31           | -1.167310e-04            | 5.881410e-06                    | -8.278850e-05           |     | 9.512820e-06                      | -1.021350e-05       |      | -1.318590e-04 |
| esco_32           | -1.827100e-02            | 1.822120e-03                    | -2.115210e-02           |     | 2.486040e-03                      | 3.663330e-04        |      | 2.496960e-02  |
| esco_33           | -1.003030e-02            | 5.951960e-04                    | -1.178940e-02           |     | 1.151070e-03                      | 4.069940e-04        |      | 3.196460e-02  |
| esco_34           | -1.539700e-02            | 1.068440e-03                    | -1.842660e-02           |     | 1.969540e-03                      | 7.230140e-04        |      | 9.009070e-02  |
| esco_35           | -2.330000e-03            | 2.132150e-04                    | -2.606250e-03           |     | 2.842370e-04                      | 1.331340e-04        |      | -6.298690e-03 |

Continued on next page



| control file name | pretreat ET-precip ratio | pretreat discharge-precip ratio | post-treat precip ratio | ET- | post-treat discharge-precip ratio | post-treat ET ratio | diff | NSE           |
|-------------------|--------------------------|---------------------------------|-------------------------|-----|-----------------------------------|---------------------|------|---------------|
| esco_36           | -1.141760e-03            | -6.554500e-06                   | -1.221090e-03           |     | 1.113940e-04                      | 9.176410e-05        |      | 9.103880e-03  |
| esco_37           | -3.016030e-04            | 4.223080e-05                    | -3.130130e-04           |     | 6.060580e-05                      | 9.398400e-06        |      | -1.103400e-03 |
| esco_38           | -1.037910e-02            | 8.938530e-04                    | -1.211850e-02           |     | 1.839710e-03                      | 1.607990e-04        |      | 3.083260e-02  |
| esco_39           | -2.764130e-03            | 3.499580e-04                    | -3.138370e-03           |     | 4.777120e-04                      | 1.068350e-04        |      | -7.348850e-03 |
| esco_40           | -1.378080e-03            | 1.943620e-04                    | -1.539900e-03           |     | 2.623370e-04                      | 2.808300e-05        |      | -4.354260e-03 |
| esco_41           | -5.013780e-04            | 7.631730e-05                    | -4.775640e-04           |     | 9.555130e-05                      | 1.343940e-05        |      | -2.760100e-03 |
| esco_42           | -1.469520e-03            | -3.019880e-05                   | -1.542500e-03           |     | 1.116510e-04                      | 1.019520e-04        |      | -1.472020e-03 |
| esco_43           | -1.725190e-03            | 1.920830e-05                    | -1.868690e-03           |     | 2.147660e-04                      | 1.367620e-04        |      | -2.284290e-03 |
| esco_44           | -2.362180e-04            | 1.581090e-05                    | -2.809290e-04           |     | 4.798080e-05                      | 2.000540e-05        |      | -7.717950e-04 |
| esco_45           | -6.083010e-04            | 4.503850e-05                    | -6.157050e-04           |     | 1.084780e-04                      | -5.885220e-05       |      | -1.747980e-03 |
| esco_46           | -2.034940e-04            | 2.025960e-05                    | -2.161860e-04           |     | 2.491350e-05                      | 5.400960e-06        |      | -8.323720e-04 |
| esco_47           | -1.098170e-03            | 8.441030e-05                    | -1.186700e-03           |     | 9.329810e-05                      | 2.991190e-05        |      | -4.490900e-03 |
| esco_v            | -2.313400e-01            | 1.696280e-02                    | -2.530150e-01           |     | 2.640460e-02                      | -1.110900e-05       |      | 7.089610e-01  |
| evrch_r           | 0.000000e+00             | -1.140480e-04                   | 0.000000e+00            |     | -9.131540e-05                     | 0.000000e+00        |      | 1.975650e-03  |
| gw_delay_01       | 0.000000e+00             | -4.423080e-06                   | 0.000000e+00            |     | -8.974360e-07                     | 0.000000e+00        |      | 9.391030e-06  |
| gw_delay_02       | 0.000000e+00             | -2.051280e-06                   | 0.000000e+00            |     | -2.500000e-06                     | 0.000000e+00        |      | 6.410260e-06  |
| gw_delay_03       | 0.000000e+00             | -2.230770e-05                   | 0.000000e+00            |     | -3.365380e-06                     | 0.000000e+00        |      | 1.322440e-04  |
| gw_delay_04       | 0.000000e+00             | -6.666670e-06                   | 0.000000e+00            |     | -1.955130e-06                     | 0.000000e+00        |      | 1.448720e-05  |
| gw_delay_05       | 0.000000e+00             | -9.721150e-05                   | 0.000000e+00            |     | -3.147440e-05                     | 0.000000e+00        |      | 2.238780e-04  |
| gw_delay_06       | 0.000000e+00             | -1.684620e-04                   | 0.000000e+00            |     | -5.445510e-05                     | 0.000000e+00        |      | 2.855770e-04  |
| gw_delay_07       | 0.000000e+00             | -2.143910e-04                   | 0.000000e+00            |     | -3.003200e-05                     | 0.000000e+00        |      | 3.587500e-04  |
| gw_delay_08       | 0.000000e+00             | -1.634620e-06                   | 0.000000e+00            |     | -4.166670e-07                     | 0.000000e+00        |      | 4.070510e-06  |

Continued on next page

| control file name | pretreat ET-precip ratio | pretreat discharge-precip ratio | post-treat precip ratio | ET- | post-treat discharge-precip ratio | post-treat ET ratio | diff | NSE          |
|-------------------|--------------------------|---------------------------------|-------------------------|-----|-----------------------------------|---------------------|------|--------------|
| gw_delay_09       | 0.000000e+00             | -4.551280e-06                   | 0.000000e+00            |     | -6.089750e-07                     | 0.000000e+00        |      | 1.179490e-05 |
| gw_delay_10       | 0.000000e+00             | -1.634620e-06                   | 0.000000e+00            |     | -4.487180e-07                     | 0.000000e+00        |      | 4.551280e-06 |
| gw_delay_11       | 0.000000e+00             | -2.205130e-05                   | 0.000000e+00            |     | -5.320510e-06                     | 0.000000e+00        |      | 4.038140e-04 |
| gw_delay_12       | 0.000000e+00             | -3.067310e-05                   | 0.000000e+00            |     | -1.887820e-05                     | 0.000000e+00        |      | 5.810900e-05 |
| gw_delay_13       | 0.000000e+00             | -4.939100e-05                   | 0.000000e+00            |     | -8.237180e-06                     | 0.000000e+00        |      | 1.370190e-04 |
| gw_delay_14       | 0.000000e+00             | -3.141030e-06                   | 0.000000e+00            |     | -3.237180e-06                     | 0.000000e+00        |      | 9.615380e-05 |
| gw_delay_15       | 0.000000e+00             | -1.634620e-06                   | 0.000000e+00            |     | -4.487180e-07                     | 0.000000e+00        |      | 5.448720e-05 |
| gw_delay_16       | 0.000000e+00             | -7.211540e-06                   | 0.000000e+00            |     | -1.955130e-06                     | 0.000000e+00        |      | 6.807690e-05 |
| gw_delay_17       | 0.000000e+00             | -2.224360e-05                   | 0.000000e+00            |     | -7.083330e-06                     | 0.000000e+00        |      | 3.384620e-05 |
| gw_delay_18       | 0.000000e+00             | -5.932690e-05                   | 0.000000e+00            |     | -9.807690e-06                     | 0.000000e+00        |      | 4.133650e-04 |
| gw_delay_19       | 0.000000e+00             | -1.657050e-05                   | 0.000000e+00            |     | -1.487180e-05                     | 0.000000e+00        |      | 3.849360e-05 |
| gw_delay_20       | 0.000000e+00             | -6.050000e-04                   | 0.000000e+00            |     | -6.951920e-05                     | 0.000000e+00        |      | 1.085510e-03 |
| gw_delay_21       | 0.000000e+00             | -2.846150e-04                   | 0.000000e+00            |     | -9.852560e-05                     | 0.000000e+00        |      | 7.357050e-04 |
| gw_delay_22       | 0.000000e+00             | -4.373400e-04                   | 0.000000e+00            |     | -6.096150e-05                     | 0.000000e+00        |      | 9.113140e-04 |
| gw_delay_23       | 0.000000e+00             | -8.333330e-07                   | 0.000000e+00            |     | -6.858970e-06                     | 0.000000e+00        |      | 0.000000e+00 |
| gw_delay_24       | 0.000000e+00             | -1.826920e-06                   | 0.000000e+00            |     | -1.125000e-05                     | 0.000000e+00        |      | 3.461540e-06 |
| gw_delay_25       | 0.000000e+00             | 0.000000e+00                    | 0.000000e+00            |     | -6.250000e-06                     | 0.000000e+00        |      | 0.000000e+00 |
| gw_delay_26       | 0.000000e+00             | 0.000000e+00                    | 0.000000e+00            |     | -6.410260e-08                     | 0.000000e+00        |      | 3.205130e-08 |
| gw_delay_27       | 0.000000e+00             | -5.028850e-05                   | 0.000000e+00            |     | -1.583330e-05                     | 0.000000e+00        |      | 8.599360e-05 |
| gw_delay_28       | 0.000000e+00             | -1.868590e-05                   | 0.000000e+00            |     | -5.993590e-06                     | 0.000000e+00        |      | 3.923080e-05 |
| gw_delay_29       | 0.000000e+00             | -3.525640e-07                   | 0.000000e+00            |     | -1.282050e-07                     | 0.000000e+00        |      | 2.564100e-07 |
| gw_delay_30       | 0.000000e+00             | -4.807690e-07                   | 0.000000e+00            |     | -1.923080e-07                     | 0.000000e+00        |      | 8.974360e-07 |

Continued on next page

| control file name | pretreat ET-precip ratio | pretreat discharge-precip ratio | post-treat precip ratio | ET- | post-treat discharge-precip ratio | post-treat ET ratio | diff | NSE          |
|-------------------|--------------------------|---------------------------------|-------------------------|-----|-----------------------------------|---------------------|------|--------------|
| gw_delay_31       | 0.000000e+00             | -1.474360e-06                   | 0.000000e+00            |     | -4.166670e-07                     | 0.000000e+00        |      | 3.173080e-06 |
| gw_delay_32       | 0.000000e+00             | -5.698080e-04                   | 0.000000e+00            |     | -1.361860e-04                     | 0.000000e+00        |      | 2.228110e-03 |
| gw_delay_33       | 0.000000e+00             | -3.087500e-04                   | 0.000000e+00            |     | -9.288460e-05                     | 0.000000e+00        |      | 9.487180e-04 |
| gw_delay_34       | 0.000000e+00             | -4.070190e-04                   | 0.000000e+00            |     | -9.512820e-05                     | 0.000000e+00        |      | 1.597600e-03 |
| gw_delay_35       | 0.000000e+00             | -5.439100e-05                   | 0.000000e+00            |     | -1.496800e-05                     | 0.000000e+00        |      | 1.665060e-04 |
| gw_delay_36       | 0.000000e+00             | -1.121790e-06                   | 0.000000e+00            |     | -2.820510e-06                     | 0.000000e+00        |      | 3.205130e-06 |
| gw_delay_37       | 0.000000e+00             | -5.512820e-06                   | 0.000000e+00            |     | -1.282050e-06                     | 0.000000e+00        |      | 1.503210e-05 |
| gw_delay_38       | 0.000000e+00             | -9.294870e-06                   | 0.000000e+00            |     | -1.830130e-05                     | 0.000000e+00        |      | 9.939100e-05 |
| gw_delay_39       | 0.000000e+00             | -3.798080e-05                   | 0.000000e+00            |     | -6.410260e-06                     | 0.000000e+00        |      | 1.057370e-04 |
| gw_delay_40       | 0.000000e+00             | -1.618590e-05                   | 0.000000e+00            |     | -2.948720e-06                     | 0.000000e+00        |      | 3.730770e-05 |
| gw_delay_41       | 0.000000e+00             | -6.794870e-06                   | 0.000000e+00            |     | -1.730770e-06                     | 0.000000e+00        |      | 1.596150e-05 |
| gw_delay_42       | 0.000000e+00             | -6.410260e-08                   | 0.000000e+00            |     | -2.788460e-06                     | 0.000000e+00        |      | 0.000000e+00 |
| gw_delay_43       | 0.000000e+00             | -1.282050e-07                   | 0.000000e+00            |     | -2.339740e-06                     | 0.000000e+00        |      | 0.000000e+00 |
| gw_delay_44       | 0.000000e+00             | -4.134610e-06                   | 0.000000e+00            |     | -6.410260e-07                     | 0.000000e+00        |      | 1.041670e-05 |
| gw_delay_45       | 0.000000e+00             | -1.128210e-05                   | 0.000000e+00            |     | -3.717950e-06                     | 0.000000e+00        |      | 2.535260e-05 |
| gw_delay_46       | 0.000000e+00             | -4.166670e-07                   | 0.000000e+00            |     | -4.166670e-07                     | 0.000000e+00        |      | 0.000000e+00 |
| gw_delay_47       | 0.000000e+00             | -3.628200e-05                   | 0.000000e+00            |     | -5.160260e-06                     | 0.000000e+00        |      | 1.553200e-04 |
| gw_delay_v        | 0.000000e+00             | -1.853400e-05                   | 0.000000e+00            |     | -4.831200e-06                     | 0.000000e+00        |      | 8.144830e-05 |
| gw_revap_01       | 0.000000e+00             | -6.217950e-06                   | 0.000000e+00            |     | -1.057690e-06                     | 0.000000e+00        |      | 2.884620e-05 |
| gw_revap_02       | 0.000000e+00             | -7.980770e-06                   | 0.000000e+00            |     | -1.038460e-05                     | 0.000000e+00        |      | 1.282050e-04 |
| gw_revap_03       | 0.000000e+00             | -2.368590e-05                   | 0.000000e+00            |     | -4.391030e-06                     | 0.000000e+00        |      | 1.282050e-05 |
| gw_revap_04       | 0.000000e+00             | -1.291670e-05                   | 0.000000e+00            |     | -5.608970e-06                     | 0.000000e+00        |      | 5.182690e-05 |

Continued on next page

| control file name | pretreat ET-precip ratio | pretreat discharge-precip ratio | post-treat precip ratio | ET- | post-treat discharge-precip ratio | post-treat ET ratio | diff | NSE          |
|-------------------|--------------------------|---------------------------------|-------------------------|-----|-----------------------------------|---------------------|------|--------------|
| gw_revap_05       | 0.000000e+00             | -6.430450e-04                   | 0.000000e+00            |     | -1.394550e-04                     | 0.000000e+00        |      | 1.574520e-03 |
| gw_revap_06       | 0.000000e+00             | -1.564100e-05                   | 0.000000e+00            |     | -1.330130e-05                     | 0.000000e+00        |      | 1.506410e-04 |
| gw_revap_07       | 0.000000e+00             | -9.297760e-04                   | 0.000000e+00            |     | -2.131730e-04                     | 0.000000e+00        |      | 4.632980e-03 |
| gw_revap_08       | 0.000000e+00             | 0.000000e+00                    | 0.000000e+00            |     | -3.205130e-08                     | 0.000000e+00        |      | 0.000000e+00 |
| gw_revap_09       | 0.000000e+00             | -2.538460e-05                   | 0.000000e+00            |     | -1.153850e-06                     | 0.000000e+00        |      | 1.523720e-04 |
| gw_revap_10       | 0.000000e+00             | 0.000000e+00                    | 0.000000e+00            |     | 0.000000e+00                      | 0.000000e+00        |      | 0.000000e+00 |
| gw_revap_11       | 0.000000e+00             | -2.275640e-05                   | 0.000000e+00            |     | -6.314100e-06                     | 0.000000e+00        |      | 1.478850e-04 |
| gw_revap_12       | 0.000000e+00             | -6.993590e-05                   | 0.000000e+00            |     | -1.442310e-05                     | 0.000000e+00        |      | 4.113460e-04 |
| gw_revap_13       | 0.000000e+00             | -2.133650e-04                   | 0.000000e+00            |     | -5.086540e-05                     | 0.000000e+00        |      | 9.847430e-04 |
| gw_revap_14       | 0.000000e+00             | -1.026600e-04                   | 0.000000e+00            |     | -8.910260e-06                     | 0.000000e+00        |      | 3.626920e-04 |
| gw_revap_15       | 0.000000e+00             | -1.429490e-05                   | 0.000000e+00            |     | -7.692310e-07                     | 0.000000e+00        |      | 6.487180e-05 |
| gw_revap_16       | 0.000000e+00             | -6.089740e-07                   | 0.000000e+00            |     | -4.487180e-07                     | 0.000000e+00        |      | 0.000000e+00 |
| gw_revap_17       | 0.000000e+00             | 0.000000e+00                    | 0.000000e+00            |     | -1.153850e-06                     | 0.000000e+00        |      | 0.000000e+00 |
| gw_revap_18       | 0.000000e+00             | -6.573720e-05                   | 0.000000e+00            |     | -9.006410e-06                     | 0.000000e+00        |      | 6.059940e-04 |
| gw_revap_19       | 0.000000e+00             | -3.489420e-04                   | 0.000000e+00            |     | -5.721150e-05                     | 0.000000e+00        |      | 1.056380e-03 |
| gw_revap_20       | 0.000000e+00             | -2.644780e-03                   | 0.000000e+00            |     | -2.312820e-04                     | 0.000000e+00        |      | 1.103570e-02 |
| gw_revap_21       | 0.000000e+00             | -4.025640e-05                   | 0.000000e+00            |     | -2.083330e-05                     | 0.000000e+00        |      | 5.320510e-04 |
| gw_revap_22       | 0.000000e+00             | -1.914870e-03                   | 0.000000e+00            |     | -5.069230e-04                     | 0.000000e+00        |      | 1.244480e-02 |
| gw_revap_23       | 0.000000e+00             | -2.120510e-04                   | 0.000000e+00            |     | -3.211540e-05                     | 0.000000e+00        |      | 1.269290e-03 |
| gw_revap_24       | 0.000000e+00             | -3.298720e-04                   | 0.000000e+00            |     | -1.039740e-04                     | 0.000000e+00        |      | 1.375100e-03 |
| gw_revap_25       | 0.000000e+00             | -8.519230e-05                   | 0.000000e+00            |     | -3.621790e-05                     | 0.000000e+00        |      | 2.872120e-04 |
| gw_revap_26       | 0.000000e+00             | -6.730770e-07                   | 0.000000e+00            |     | 0.000000e+00                      | 0.000000e+00        |      | 6.442310e-06 |

Continued on next page

| control file name | pretreat ET-precip ratio | pretreat discharge-precip ratio | post-treat precip ratio | ET- | post-treat discharge-precip ratio | post-treat ET ratio | diff | NSE          |
|-------------------|--------------------------|---------------------------------|-------------------------|-----|-----------------------------------|---------------------|------|--------------|
| gw_revap_27       | 0.000000e+00             | -1.635900e-04                   | 0.000000e+00            |     | -6.817310e-05                     | 0.000000e+00        |      | 9.538140e-04 |
| gw_revap_28       | 0.000000e+00             | 0.000000e+00                    | 0.000000e+00            |     | -7.371790e-07                     | 0.000000e+00        |      | 0.000000e+00 |
| gw_revap_29       | 0.000000e+00             | -3.205130e-08                   | 0.000000e+00            |     | -3.205130e-08                     | 0.000000e+00        |      | 0.000000e+00 |
| gw_revap_30       | 0.000000e+00             | -2.467950e-06                   | 0.000000e+00            |     | -1.025640e-06                     | 0.000000e+00        |      | 9.935900e-06 |
| gw_revap_31       | 0.000000e+00             | -3.846150e-07                   | 0.000000e+00            |     | -1.923080e-07                     | 0.000000e+00        |      | 0.000000e+00 |
| gw_revap_32       | 0.000000e+00             | -1.094970e-03                   | 0.000000e+00            |     | -6.452880e-04                     | 0.000000e+00        |      | 5.264840e-03 |
| gw_revap_33       | 0.000000e+00             | -1.256730e-04                   | 0.000000e+00            |     | -1.958330e-05                     | 0.000000e+00        |      | 4.711540e-04 |
| gw_revap_34       | 0.000000e+00             | -3.482370e-04                   | 0.000000e+00            |     | -4.432690e-05                     | 0.000000e+00        |      | 4.160260e-03 |
| gw_revap_35       | 0.000000e+00             | -2.342950e-05                   | 0.000000e+00            |     | -2.884620e-06                     | 0.000000e+00        |      | 2.916670e-04 |
| gw_revap_36       | 0.000000e+00             | -1.162500e-04                   | 0.000000e+00            |     | -6.250000e-06                     | 0.000000e+00        |      | 7.976600e-04 |
| gw_revap_37       | 0.000000e+00             | -9.615390e-07                   | 0.000000e+00            |     | -4.166670e-07                     | 0.000000e+00        |      | 0.000000e+00 |
| gw_revap_38       | 0.000000e+00             | -3.688140e-04                   | 0.000000e+00            |     | -5.371790e-05                     | 0.000000e+00        |      | 1.771350e-03 |
| gw_revap_39       | 0.000000e+00             | -1.755770e-04                   | 0.000000e+00            |     | -4.269230e-05                     | 0.000000e+00        |      | 4.796150e-04 |
| gw_revap_40       | 0.000000e+00             | -9.086540e-05                   | 0.000000e+00            |     | -1.217950e-05                     | 0.000000e+00        |      | 3.124680e-04 |
| gw_revap_41       | 0.000000e+00             | 0.000000e+00                    | 0.000000e+00            |     | -1.602560e-07                     | 0.000000e+00        |      | 0.000000e+00 |
| gw_revap_42       | 0.000000e+00             | -1.094550e-04                   | 0.000000e+00            |     | -7.756410e-06                     | 0.000000e+00        |      | 4.803850e-04 |
| gw_revap_43       | 0.000000e+00             | -2.564100e-07                   | 0.000000e+00            |     | -1.500000e-05                     | 0.000000e+00        |      | 0.000000e+00 |
| gw_revap_44       | 0.000000e+00             | -2.391030e-05                   | 0.000000e+00            |     | -2.051280e-06                     | 0.000000e+00        |      | 1.468910e-04 |
| gw_revap_45       | 0.000000e+00             | 0.000000e+00                    | 0.000000e+00            |     | -6.410260e-08                     | 0.000000e+00        |      | 0.000000e+00 |
| gw_revap_46       | 0.000000e+00             | -1.410260e-06                   | 0.000000e+00            |     | -1.153850e-06                     | 0.000000e+00        |      | 6.730770e-06 |
| gw_revap_47       | 0.000000e+00             | -4.649650e-04                   | 0.000000e+00            |     | -4.492340e-04                     | 0.000000e+00        |      | 9.741350e-04 |
| gw_revap_v        | 0.000000e+00             | -3.647600e-02                   | 0.000000e+00            |     | -2.927460e-02                     | 0.000000e+00        |      | 1.150940e-01 |

Continued on next page

| control file name | pretreat ET-precip ratio | pretreat discharge-precip ratio | post-treat precip ratio | ET- | post-treat discharge-precip ratio | post-treat ET ratio | diff | NSE          |
|-------------------|--------------------------|---------------------------------|-------------------------|-----|-----------------------------------|---------------------|------|--------------|
| gwqmn_01          | 0.000000e+00             | 0.000000e+00                    | 0.000000e+00            |     | 0.000000e+00                      | 0.000000e+00        |      | 0.000000e+00 |
| gwqmn_02          | 0.000000e+00             | 0.000000e+00                    | 0.000000e+00            |     | 0.000000e+00                      | 0.000000e+00        |      | 0.000000e+00 |
| gwqmn_03          | 0.000000e+00             | 0.000000e+00                    | 0.000000e+00            |     | 0.000000e+00                      | 0.000000e+00        |      | 0.000000e+00 |
| gwqmn_04          | 0.000000e+00             | 0.000000e+00                    | 0.000000e+00            |     | 0.000000e+00                      | 0.000000e+00        |      | 0.000000e+00 |
| gwqmn_05          | 0.000000e+00             | 0.000000e+00                    | 0.000000e+00            |     | 0.000000e+00                      | 0.000000e+00        |      | 0.000000e+00 |
| gwqmn_06          | 0.000000e+00             | 0.000000e+00                    | 0.000000e+00            |     | 0.000000e+00                      | 0.000000e+00        |      | 0.000000e+00 |
| gwqmn_07          | 0.000000e+00             | 0.000000e+00                    | 0.000000e+00            |     | 0.000000e+00                      | 0.000000e+00        |      | 0.000000e+00 |
| gwqmn_08          | 0.000000e+00             | 0.000000e+00                    | 0.000000e+00            |     | 0.000000e+00                      | 0.000000e+00        |      | 0.000000e+00 |
| gwqmn_09          | 0.000000e+00             | 0.000000e+00                    | 0.000000e+00            |     | 0.000000e+00                      | 0.000000e+00        |      | 0.000000e+00 |
| gwqmn_10          | 0.000000e+00             | 0.000000e+00                    | 0.000000e+00            |     | 0.000000e+00                      | 0.000000e+00        |      | 0.000000e+00 |
| gwqmn_11          | 0.000000e+00             | 0.000000e+00                    | 0.000000e+00            |     | 0.000000e+00                      | 0.000000e+00        |      | 0.000000e+00 |
| gwqmn_12          | 0.000000e+00             | 0.000000e+00                    | 0.000000e+00            |     | 0.000000e+00                      | 0.000000e+00        |      | 0.000000e+00 |
| gwqmn_13          | 0.000000e+00             | 0.000000e+00                    | 0.000000e+00            |     | 0.000000e+00                      | 0.000000e+00        |      | 0.000000e+00 |
| gwqmn_14          | 0.000000e+00             | 0.000000e+00                    | 0.000000e+00            |     | 0.000000e+00                      | 0.000000e+00        |      | 0.000000e+00 |
| gwqmn_15          | 0.000000e+00             | 0.000000e+00                    | 0.000000e+00            |     | 0.000000e+00                      | 0.000000e+00        |      | 0.000000e+00 |
| gwqmn_16          | 0.000000e+00             | 0.000000e+00                    | 0.000000e+00            |     | 0.000000e+00                      | 0.000000e+00        |      | 0.000000e+00 |
| gwqmn_17          | 0.000000e+00             | 0.000000e+00                    | 0.000000e+00            |     | 0.000000e+00                      | 0.000000e+00        |      | 0.000000e+00 |
| gwqmn_18          | 0.000000e+00             | 0.000000e+00                    | 0.000000e+00            |     | 0.000000e+00                      | 0.000000e+00        |      | 0.000000e+00 |
| gwqmn_19          | 0.000000e+00             | 0.000000e+00                    | 0.000000e+00            |     | 0.000000e+00                      | 0.000000e+00        |      | 0.000000e+00 |
| gwqmn_20          | 0.000000e+00             | 0.000000e+00                    | 0.000000e+00            |     | 0.000000e+00                      | 0.000000e+00        |      | 0.000000e+00 |
| gwqmn_21          | 0.000000e+00             | 0.000000e+00                    | 0.000000e+00            |     | 0.000000e+00                      | 0.000000e+00        |      | 0.000000e+00 |
| gwqmn_22          | 0.000000e+00             | 0.000000e+00                    | 0.000000e+00            |     | 0.000000e+00                      | 0.000000e+00        |      | 0.000000e+00 |

Continued on next page

| control file name | pretreat ET-precip ratio | pretreat discharge-precip ratio | post-treat precip ratio | ET- | post-treat discharge-precip ratio | post-treat ET diff | NSE          |
|-------------------|--------------------------|---------------------------------|-------------------------|-----|-----------------------------------|--------------------|--------------|
| gwqmn_23          | 0.000000e+00             | 0.000000e+00                    | 0.000000e+00            |     | 0.000000e+00                      | 0.000000e+00       | 0.000000e+00 |
| gwqmn_24          | 0.000000e+00             | 0.000000e+00                    | 0.000000e+00            |     | 0.000000e+00                      | 0.000000e+00       | 0.000000e+00 |
| gwqmn_25          | 0.000000e+00             | 0.000000e+00                    | 0.000000e+00            |     | 0.000000e+00                      | 0.000000e+00       | 0.000000e+00 |
| gwqmn_26          | 0.000000e+00             | 0.000000e+00                    | 0.000000e+00            |     | 0.000000e+00                      | 0.000000e+00       | 0.000000e+00 |
| gwqmn_27          | 0.000000e+00             | 0.000000e+00                    | 0.000000e+00            |     | 0.000000e+00                      | 0.000000e+00       | 0.000000e+00 |
| gwqmn_28          | 0.000000e+00             | 0.000000e+00                    | 0.000000e+00            |     | 0.000000e+00                      | 0.000000e+00       | 0.000000e+00 |
| gwqmn_29          | 0.000000e+00             | 0.000000e+00                    | 0.000000e+00            |     | 0.000000e+00                      | 0.000000e+00       | 0.000000e+00 |
| gwqmn_30          | 0.000000e+00             | 0.000000e+00                    | 0.000000e+00            |     | 0.000000e+00                      | 0.000000e+00       | 0.000000e+00 |
| gwqmn_31          | 0.000000e+00             | 0.000000e+00                    | 0.000000e+00            |     | 0.000000e+00                      | 0.000000e+00       | 0.000000e+00 |
| gwqmn_32          | 0.000000e+00             | 0.000000e+00                    | 0.000000e+00            |     | 0.000000e+00                      | 0.000000e+00       | 0.000000e+00 |
| gwqmn_33          | 0.000000e+00             | 0.000000e+00                    | 0.000000e+00            |     | 0.000000e+00                      | 0.000000e+00       | 0.000000e+00 |
| gwqmn_34          | 0.000000e+00             | 0.000000e+00                    | 0.000000e+00            |     | 0.000000e+00                      | 0.000000e+00       | 0.000000e+00 |
| gwqmn_35          | 0.000000e+00             | 0.000000e+00                    | 0.000000e+00            |     | 0.000000e+00                      | 0.000000e+00       | 0.000000e+00 |
| gwqmn_36          | 0.000000e+00             | 0.000000e+00                    | 0.000000e+00            |     | 0.000000e+00                      | 0.000000e+00       | 0.000000e+00 |
| gwqmn_37          | 0.000000e+00             | 0.000000e+00                    | 0.000000e+00            |     | 0.000000e+00                      | 0.000000e+00       | 0.000000e+00 |
| gwqmn_38          | 0.000000e+00             | 0.000000e+00                    | 0.000000e+00            |     | 0.000000e+00                      | 0.000000e+00       | 0.000000e+00 |
| gwqmn_39          | 0.000000e+00             | 0.000000e+00                    | 0.000000e+00            |     | 0.000000e+00                      | 0.000000e+00       | 0.000000e+00 |
| gwqmn_40          | 0.000000e+00             | 0.000000e+00                    | 0.000000e+00            |     | 0.000000e+00                      | 0.000000e+00       | 0.000000e+00 |
| gwqmn_41          | 0.000000e+00             | 0.000000e+00                    | 0.000000e+00            |     | 0.000000e+00                      | 0.000000e+00       | 0.000000e+00 |
| gwqmn_42          | 0.000000e+00             | 0.000000e+00                    | 0.000000e+00            |     | 0.000000e+00                      | 0.000000e+00       | 0.000000e+00 |
| gwqmn_43          | 0.000000e+00             | 0.000000e+00                    | 0.000000e+00            |     | 0.000000e+00                      | 0.000000e+00       | 0.000000e+00 |
| gwqmn_44          | 0.000000e+00             | 0.000000e+00                    | 0.000000e+00            |     | 0.000000e+00                      | 0.000000e+00       | 0.000000e+00 |

Continued on next page

| control file name | pretreat ET-precip ratio | pretreat discharge-precip ratio | post-treat precip ratio | ET- | post-treat discharge-precip ratio | post-treat ET diff | NSE           |
|-------------------|--------------------------|---------------------------------|-------------------------|-----|-----------------------------------|--------------------|---------------|
| gwqmn_45          | 0.000000e+00             | 0.000000e+00                    | 0.000000e+00            |     | 0.000000e+00                      | 0.000000e+00       | 0.000000e+00  |
| gwqmn_46          | 0.000000e+00             | 0.000000e+00                    | 0.000000e+00            |     | 0.000000e+00                      | 0.000000e+00       | 0.000000e+00  |
| gwqmn_47          | 0.000000e+00             | 0.000000e+00                    | 0.000000e+00            |     | 0.000000e+00                      | 0.000000e+00       | 0.000000e+00  |
| gwqmn_v           | 0.000000e+00             | -8.233070e-06                   | 0.000000e+00            |     | -5.210440e-06                     | 0.000000e+00       | 2.431620e-05  |
| hru_slp_01        | -1.804490e-05            | 7.012180e-05                    | -3.092950e-05           |     | 5.400320e-05                      | 9.832050e-06       | -4.365510e-03 |
| hru_slp_02        | -5.560900e-05            | 2.339360e-04                    | -6.987180e-05           |     | 1.677310e-04                      | 1.608970e-07       | -6.664520e-03 |
| hru_slp_03        | -5.533330e-04            | 1.449840e-03                    | -7.909620e-04           |     | 1.066410e-03                      | 8.740350e-05       | -2.279940e-02 |
| hru_slp_04        | -3.141030e-06            | 1.396790e-05                    | -2.115380e-06           |     | 7.711540e-06                      | -5.019230e-07      | -1.415380e-04 |
| hru_slp_05        | -1.200640e-04            | 5.104040e-04                    | -1.617950e-04           |     | 3.970770e-04                      | -9.238140e-06      | -6.576320e-03 |
| hru_slp_06        | -1.987180e-05            | 1.091030e-04                    | -3.397440e-05           |     | 8.329810e-05                      | -1.628530e-06      | -1.618270e-03 |
| hru_slp_07        | -2.721150e-05            | 2.537630e-04                    | -3.666670e-05           |     | 1.628880e-04                      | -1.770580e-05      | -5.446920e-03 |
| hru_slp_08        | -1.602560e-07            | 1.394230e-06                    | -1.602560e-07           |     | 5.865390e-07                      | -1.540710e-06      | -3.782050e-06 |
| hru_slp_09        | -5.128200e-06            | 4.362180e-06                    | -1.634620e-06           |     | 4.349360e-06                      | -1.847120e-06      | 1.074680e-04  |
| hru_slp_10        | 0.000000e+00             | 6.602560e-07                    | -9.615390e-08           |     | 6.314100e-07                      | -5.769230e-08      | -1.250000e-06 |
| hru_slp_11        | -1.833330e-05            | 1.098970e-04                    | -2.009620e-05           |     | 9.588780e-05                      | -2.915380e-06      | -1.134940e-03 |
| hru_slp_12        | -9.060900e-05            | 4.869710e-04                    | -1.179810e-04           |     | 3.809970e-04                      | -1.504290e-05      | -8.873300e-03 |
| hru_slp_13        | -1.423080e-04            | 6.944390e-04                    | -1.941350e-04           |     | 5.568780e-04                      | 1.685930e-05       | -1.495840e-02 |
| hru_slp_14        | -1.586540e-05            | 9.423080e-05                    | -3.134620e-05           |     | 6.782050e-05                      | 3.361540e-06       | -1.104360e-03 |
| hru_slp_15        | -8.333330e-07            | 1.858970e-05                    | -5.608970e-06           |     | 1.219230e-05                      | -6.439110e-07      | -3.168910e-04 |
| hru_slp_16        | -2.525640e-05            | 9.309940e-05                    | -3.448720e-05           |     | 6.960580e-05                      | -4.645190e-06      | -1.516470e-03 |
| hru_slp_17        | -4.080130e-05            | 2.189620e-04                    | -7.807690e-05           |     | 1.675190e-04                      | 1.798210e-05       | -2.265480e-03 |
| hru_slp_18        | -1.908210e-03            | 5.112950e-03                    | -3.059900e-03           |     | 3.655670e-03                      | 3.353530e-04       | -1.183280e-01 |

Continued on next page



| control file name | pretreat ET-precip ratio | pretreat discharge-precip ratio | post-treat precip ratio | ET- | post-treat discharge-precip ratio | post-treat ET ratio | diff | NSE           |
|-------------------|--------------------------|---------------------------------|-------------------------|-----|-----------------------------------|---------------------|------|---------------|
| hru_slp_19        | -1.436220e-04            | 7.332240e-04                    | -2.181410e-04           |     | 5.622850e-04                      | -4.083170e-05       |      | -8.516350e-03 |
| hru_slp_20        | -1.107690e-04            | 3.593210e-04                    | -1.183970e-04           |     | 2.698690e-04                      | -8.077570e-06       |      | -4.934100e-03 |
| hru_slp_21        | -2.344230e-04            | 1.185600e-03                    | -2.929170e-04           |     | 9.149360e-04                      | 2.539260e-05        |      | -1.821250e-02 |
| hru_slp_22        | -5.817310e-05            | 3.806440e-04                    | -7.945510e-05           |     | 2.431510e-04                      | 8.323390e-06        |      | -3.954040e-03 |
| hru_slp_23        | -1.310900e-05            | 1.547760e-05                    | -4.679490e-06           |     | 1.361860e-05                      | -7.205120e-07       |      | 1.474380e-06  |
| hru_slp_24        | -2.852560e-05            | 6.227240e-05                    | -3.096150e-05           |     | 4.525000e-05                      | 6.551930e-06        |      | -1.758970e-04 |
| hru_slp_25        | -4.567310e-05            | 1.351250e-04                    | -5.506410e-05           |     | 1.102760e-04                      | 8.866030e-06        |      | -1.076380e-03 |
| hru_slp_26        | 0.000000e+00             | 6.923080e-07                    | -8.653850e-07           |     | 6.025640e-07                      | 9.028850e-07        |      | -5.128200e-06 |
| hru_slp_27        | -1.836540e-05            | 9.010900e-05                    | -3.320510e-05           |     | 5.802560e-05                      | -2.003850e-06       |      | -1.255030e-03 |
| hru_slp_28        | -1.057690e-06            | 1.689420e-05                    | -6.955130e-06           |     | 1.087820e-05                      | 4.546150e-06        |      | -2.098080e-04 |
| hru_slp_29        | 0.000000e+00             | 2.564100e-07                    | 0.000000e+00            |     | 5.160260e-07                      | 0.000000e+00        |      | -2.884620e-07 |
| hru_slp_30        | 0.000000e+00             | 1.560900e-06                    | -9.615380e-08           |     | 1.833330e-06                      | 9.615380e-08        |      | -5.769230e-06 |
| hru_slp_31        | -4.038460e-06            | 2.481730e-05                    | -7.564100e-06           |     | 2.290380e-05                      | 4.818590e-06        |      | -3.232370e-04 |
| hru_slp_32        | -5.709300e-04            | 3.108200e-03                    | -7.276600e-04           |     | 2.150070e-03                      | 7.410260e-05        |      | -6.242400e-02 |
| hru_slp_33        | -2.472760e-04            | 1.295620e-03                    | -3.442310e-04           |     | 9.902950e-04                      | 1.831540e-05        |      | -3.037270e-02 |
| hru_slp_34        | -7.402880e-04            | 4.536030e-03                    | -1.109900e-03           |     | 3.565250e-03                      | 1.413200e-05        |      | -1.175720e-01 |
| hru_slp_35        | -6.740390e-05            | 2.098490e-04                    | -9.044870e-05           |     | 1.428750e-04                      | 2.584620e-06        |      | -1.961280e-03 |
| hru_slp_36        | -3.256410e-05            | 8.426280e-05                    | -3.189100e-05           |     | 5.675320e-05                      | -6.134610e-06       |      | -9.209290e-04 |
| hru_slp_37        | -2.208330e-05            | 6.529490e-05                    | -4.490380e-05           |     | 4.290380e-05                      | 1.204970e-05        |      | -1.020160e-03 |
| hru_slp_38        | -9.057370e-04            | 2.153020e-03                    | -1.207530e-03           |     | 1.645670e-03                      | 4.381350e-05        |      | -4.657280e-02 |
| hru_slp_39        | -9.461540e-05            | 2.173690e-04                    | -8.583330e-05           |     | 1.709740e-04                      | -1.106150e-05       |      | -2.758750e-03 |
| hru_slp_40        | -2.070510e-05            | 7.865380e-05                    | -3.237180e-05           |     | 5.729170e-05                      | 6.033330e-06        |      | -1.020540e-03 |

Continued on next page

| control file name | pretreat ET-precip ratio | pretreat discharge-precip ratio | post-treat precip ratio | ET- | post-treat discharge-precip ratio | post-treat ET ratio | diff | NSE           |
|-------------------|--------------------------|---------------------------------|-------------------------|-----|-----------------------------------|---------------------|------|---------------|
| hru_slp_41        | -8.108970e-06            | 1.628850e-05                    | -6.506410e-06           |     | 9.782050e-06                      | -4.271150e-06       |      | -2.679810e-04 |
| hru_slp_42        | -5.384620e-06            | 1.418590e-05                    | -8.814100e-06           |     | 1.200640e-05                      | 1.832370e-06        |      | -1.890710e-04 |
| hru_slp_43        | -2.500000e-06            | 1.336220e-05                    | -3.589740e-06           |     | 9.240380e-06                      | -3.590060e-06       |      | -2.230130e-04 |
| hru_slp_44        | -1.602560e-07            | 1.666670e-06                    | -9.615380e-08           |     | 1.003210e-06                      | -8.012820e-08       |      | -2.532050e-06 |
| hru_slp_45        | -6.089740e-07            | 5.323720e-06                    | -2.051280e-06           |     | 6.333330e-06                      | -1.082050e-06       |      | -5.125000e-05 |
| hru_slp_46        | -6.025640e-06            | 2.908330e-05                    | -3.653850e-06           |     | 1.471470e-05                      | -6.043590e-06       |      | -4.086990e-03 |
| hru_slp_47        | -1.506410e-05            | 1.844040e-04                    | -1.996800e-05           |     | 1.250190e-04                      | -7.447760e-06       |      | -1.546550e-02 |
| hru_slp_r         | -7.414980e-03            | 2.625740e-02                    | -1.055380e-02           |     | 1.931660e-02                      | 1.020430e-03        |      | -5.664000e-01 |
| ov_n_01           | 0.000000e+00             | 5.801280e-07                    | 0.000000e+00            |     | -4.551280e-07                     | 0.000000e+00        |      | -8.333330e-06 |
| ov_n_02           | 0.000000e+00             | -3.000000e-06                   | 0.000000e+00            |     | -2.275640e-06                     | 0.000000e+00        |      | 2.233650e-04  |
| ov_n_03           | 0.000000e+00             | -1.983970e-06                   | 0.000000e+00            |     | -2.371790e-06                     | 0.000000e+00        |      | 1.557370e-04  |
| ov_n_04           | 0.000000e+00             | -9.775640e-07                   | 0.000000e+00            |     | -1.548080e-06                     | 0.000000e+00        |      | 5.022440e-05  |
| ov_n_05           | 0.000000e+00             | -8.237180e-07                   | 0.000000e+00            |     | 9.519230e-07                      | 0.000000e+00        |      | 2.602920e-04  |
| ov_n_06           | 0.000000e+00             | -4.631410e-06                   | -9.615380e-08           |     | 5.128200e-07                      | 9.615380e-08        |      | 4.316470e-04  |
| ov_n_07           | 0.000000e+00             | 1.054490e-06                    | -9.615380e-08           |     | -2.756410e-06                     | 9.615380e-08        |      | 8.996480e-05  |
| ov_n_08           | 0.000000e+00             | -1.538460e-06                   | 0.000000e+00            |     | 2.884620e-07                      | 0.000000e+00        |      | 2.660260e-05  |
| ov_n_09           | 0.000000e+00             | -1.618590e-06                   | 0.000000e+00            |     | 5.608980e-07                      | -9.615380e-09       |      | 2.548080e-05  |
| ov_n_10           | 0.000000e+00             | 3.205120e-09                    | 0.000000e+00            |     | 1.987180e-07                      | -9.615380e-09       |      | 0.000000e+00  |
| ov_n_11           | 0.000000e+00             | 8.653850e-07                    | 0.000000e+00            |     | -2.756410e-07                     | 0.000000e+00        |      | 3.557690e-05  |
| ov_n_12           | 0.000000e+00             | 1.423080e-06                    | 0.000000e+00            |     | -5.416670e-07                     | 0.000000e+00        |      | 2.147440e-05  |
| ov_n_13           | 0.000000e+00             | -4.198720e-06                   | 0.000000e+00            |     | -5.000000e-07                     | 0.000000e+00        |      | 2.352560e-04  |
| ov_n_14           | 0.000000e+00             | -9.935900e-07                   | 0.000000e+00            |     | -1.403850e-06                     | 0.000000e+00        |      | 7.051280e-05  |

Continued on next page

| control file name | pretreat ET-precip ratio | pretreat discharge-precip ratio | post-treat ET-precip ratio | ET-discharge-precip ratio | post-treat ET diff | NSE           |
|-------------------|--------------------------|---------------------------------|----------------------------|---------------------------|--------------------|---------------|
| ov_n_15           | 0.000000e+00             | 0.000000e+00                    | 0.000000e+00               | -7.692310e-08             | 0.000000e+00       | 0.000000e+00  |
| ov_n_16           | 0.000000e+00             | 0.000000e+00                    | 0.000000e+00               | -3.653850e-07             | 0.000000e+00       | 0.000000e+00  |
| ov_n_17           | 0.000000e+00             | 2.115390e-07                    | 0.000000e+00               | 1.525640e-06              | 0.000000e+00       | -1.141030e-05 |
| ov_n_18           | 0.000000e+00             | -9.615390e-07                   | 0.000000e+00               | 2.483970e-06              | 0.000000e+00       | 1.282050e-04  |
| ov_n_19           | 0.000000e+00             | 6.506410e-07                    | 0.000000e+00               | 2.592950e-06              | 0.000000e+00       | 1.078750e-04  |
| ov_n_20           | 0.000000e+00             | -1.563780e-05                   | -8.974360e-07              | -1.661860e-05             | 9.647430e-07       | 1.883520e-03  |
| ov_n_21           | 0.000000e+00             | -2.189100e-06                   | 0.000000e+00               | 7.307690e-07              | 0.000000e+00       | 1.214520e-04  |
| ov_n_22           | 0.000000e+00             | -8.044870e-06                   | -7.371790e-07              | -9.243590e-06             | 9.615380e-07       | 5.592310e-04  |
| ov_n_23           | 0.000000e+00             | -8.448720e-06                   | 0.000000e+00               | -1.048080e-06             | 9.615380e-09       | 3.955510e-03  |
| ov_n_24           | 0.000000e+00             | -1.295510e-05                   | 0.000000e+00               | 2.410260e-06              | 0.000000e+00       | 4.341450e-03  |
| ov_n_25           | 0.000000e+00             | -1.814100e-06                   | 0.000000e+00               | -1.387820e-06             | -9.615380e-09      | 1.399780e-04  |
| ov_n_26           | 0.000000e+00             | 0.000000e+00                    | 0.000000e+00               | 3.205120e-08              | 0.000000e+00       | 0.000000e+00  |
| ov_n_27           | 0.000000e+00             | 7.852560e-07                    | 0.000000e+00               | -2.147440e-07             | 0.000000e+00       | 3.118590e-05  |
| ov_n_28           | 0.000000e+00             | 1.541670e-06                    | 0.000000e+00               | 2.506410e-06              | 0.000000e+00       | -6.483980e-05 |
| ov_n_29           | 0.000000e+00             | 0.000000e+00                    | 0.000000e+00               | 0.000000e+00              | 0.000000e+00       | 0.000000e+00  |
| ov_n_30           | 0.000000e+00             | 0.000000e+00                    | 0.000000e+00               | 0.000000e+00              | 0.000000e+00       | 0.000000e+00  |
| ov_n_31           | 0.000000e+00             | 0.000000e+00                    | 0.000000e+00               | 8.621790e-07              | 0.000000e+00       | 0.000000e+00  |
| ov_n_32           | 0.000000e+00             | -6.634610e-06                   | 0.000000e+00               | 2.051280e-07              | 0.000000e+00       | 4.073140e-03  |
| ov_n_33           | 0.000000e+00             | -4.967950e-06                   | 0.000000e+00               | 4.775650e-07              | 0.000000e+00       | 5.621800e-04  |
| ov_n_34           | 0.000000e+00             | 8.974360e-06                    | 0.000000e+00               | 1.634610e-07              | 0.000000e+00       | -3.353530e-03 |
| ov_n_35           | 0.000000e+00             | 5.929500e-07                    | 0.000000e+00               | 5.064100e-07              | 7.980770e-07       | 5.804490e-05  |
| ov_n_36           | 0.000000e+00             | 1.070510e-06                    | 0.000000e+00               | 6.282050e-07              | 0.000000e+00       | 1.241350e-04  |

Continued on next page

| control file name | pretreat ET-precip ratio | pretreat discharge-precip ratio | post-treat precip ratio | ET- | post-treat discharge-precip ratio | post-treat ET ratio | diff | NSE           |
|-------------------|--------------------------|---------------------------------|-------------------------|-----|-----------------------------------|---------------------|------|---------------|
| ov_n_37           | 0.000000e+00             | 7.724360e-07                    | 0.000000e+00            |     | 1.493590e-06                      | -8.012820e-08       |      | -1.282050e-05 |
| ov_n_38           | 0.000000e+00             | -2.676280e-06                   | 9.615380e-08            |     | 7.500000e-07                      | 1.621790e-06        |      | 2.253850e-04  |
| ov_n_39           | 0.000000e+00             | -9.935840e-08                   | 0.000000e+00            |     | 5.769230e-07                      | -7.692310e-08       |      | 1.964740e-05  |
| ov_n_40           | 0.000000e+00             | -2.830130e-06                   | -6.410260e-08           |     | -1.038460e-06                     | 9.935900e-08        |      | 2.094330e-04  |
| ov_n_41           | -1.602560e-07            | -9.967950e-07                   | 0.000000e+00            |     | 1.455130e-06                      | 0.000000e+00        |      | 1.050640e-05  |
| ov_n_42           | 0.000000e+00             | -1.762820e-06                   | 0.000000e+00            |     | -4.391020e-07                     | -1.634620e-07       |      | 6.351280e-05  |
| ov_n_43           | 0.000000e+00             | -2.733970e-06                   | 6.410260e-08            |     | -1.163460e-06                     | 7.525640e-07        |      | 1.736540e-04  |
| ov_n_44           | 0.000000e+00             | -2.429490e-06                   | 0.000000e+00            |     | 1.676280e-06                      | -9.615380e-09       |      | 5.150640e-05  |
| ov_n_45           | 0.000000e+00             | -2.179490e-06                   | -6.410250e-08           |     | 6.089750e-08                      | 9.615380e-08        |      | 8.612180e-05  |
| ov_n_46           | 0.000000e+00             | -1.987180e-07                   | 0.000000e+00            |     | 2.628200e-07                      | 0.000000e+00        |      | 3.205130e-06  |
| ov_n_47           | 0.000000e+00             | -6.575000e-05                   | 0.000000e+00            |     | -9.239100e-05                     | 0.000000e+00        |      | 1.794440e-02  |
| ov_n_r            | 3.750000e-07             | -1.107480e-04                   | -5.288460e-07           |     | -1.109850e-04                     | -7.875000e-08       |      | 2.042830e-02  |
| pcp_0_2001        | 7.878610e-04             | 3.050720e-05                    | 0.000000e+00            |     | 0.000000e+00                      | 6.418270e-08        |      | -4.031320e-03 |
| pcp_0_2002        | -4.499280e-04            | -3.208270e-04                   | 0.000000e+00            |     | 0.000000e+00                      | -2.403850e-09       |      | -7.658050e-02 |
| pcp_0_2003        | -1.855050e-04            | -6.163990e-04                   | 0.000000e+00            |     | 0.000000e+00                      | 6.009610e-08        |      | -5.061480e-03 |
| pcp_0_2004        | 0.000000e+00             | 0.000000e+00                    | 6.437500e-05            |     | 8.718510e-05                      | -1.951300e-05       |      | 0.000000e+00  |
| pcp_0_2005        | 0.000000e+00             | 0.000000e+00                    | 1.114420e-04            |     | -7.024760e-05                     | -8.511300e-06       |      | 0.000000e+00  |
| pcp_0_2006        | 0.000000e+00             | 0.000000e+00                    | -9.237980e-05           |     | -2.811080e-04                     | 3.478240e-04        |      | 0.000000e+00  |
| pcp_0_2007        | 0.000000e+00             | 0.000000e+00                    | -5.045580e-03           |     | 8.333290e-04                      | 2.994820e-04        |      | 0.000000e+00  |
| pcp_0_2008        | 0.000000e+00             | 0.000000e+00                    | 1.478170e-03            |     | -4.284830e-04                     | 3.276260e-04        |      | 0.000000e+00  |
| pcp_0_2009        | 0.000000e+00             | 0.000000e+00                    | -3.500290e-03           |     | -7.867810e-06                     | -2.936100e-04       |      | 0.000000e+00  |
| pcp_0_2010        | 0.000000e+00             | 0.000000e+00                    | -3.422980e-03           |     | -1.359300e-04                     | -2.666740e-04       |      | 0.000000e+00  |

Continued on next page

| control file name | pretreat ET-precip ratio | pretreat discharge-precip ratio | post-treat precip ratio | ET- | post-treat discharge-precip ratio | post-treat ET diff | NSE           |
|-------------------|--------------------------|---------------------------------|-------------------------|-----|-----------------------------------|--------------------|---------------|
| pcp_1_2001        | 1.184500e-03             | 4.524280e-05                    | 0.000000e+00            |     | 0.000000e+00                      | 1.370190e-07       | -9.989600e-04 |
| pcp_1_2002        | -2.260790e-03            | -3.435380e-04                   | 0.000000e+00            |     | 0.000000e+00                      | -6.009620e-08      | -5.402840e-02 |
| pcp_1_2003        | 2.175120e-03             | -2.043450e-03                   | 0.000000e+00            |     | 0.000000e+00                      | 2.403900e-09       | -5.333410e-03 |
| pcp_1_2004        | 0.000000e+00             | 0.000000e+00                    | -1.009620e-06           |     | 1.104570e-05                      | 1.229330e-06       | 0.000000e+00  |
| pcp_1_2005        | 0.000000e+00             | 0.000000e+00                    | -2.708940e-03           |     | 6.182450e-05                      | -6.985090e-06      | 0.000000e+00  |
| pcp_1_2006        | 0.000000e+00             | 0.000000e+00                    | -1.396390e-04           |     | 9.936780e-05                      | -4.820460e-05      | 0.000000e+00  |
| pcp_1_2007        | 0.000000e+00             | 0.000000e+00                    | 3.691590e-04            |     | -1.255890e-04                     | 2.035590e-04       | 0.000000e+00  |
| pcp_1_2008        | 0.000000e+00             | 0.000000e+00                    | 4.563700e-04            |     | -3.532210e-05                     | 5.358750e-05       | 0.000000e+00  |
| pcp_1_2009        | 0.000000e+00             | 0.000000e+00                    | 2.923080e-05            |     | -1.654090e-05                     | 1.508200e-05       | 0.000000e+00  |
| pcp_1_2010        | 0.000000e+00             | 0.000000e+00                    | -6.869230e-04           |     | 6.028610e-05                      | 3.113750e-05       | 0.000000e+00  |
| pcp_2_2001        | 4.049860e-03             | 1.841490e-04                    | 0.000000e+00            |     | 0.000000e+00                      | -1.265140e-06      | -6.931440e-03 |
| pcp_2_2002        | -4.288390e-02            | -9.009350e-04                   | 0.000000e+00            |     | 0.000000e+00                      | -1.009620e-06      | -9.238230e-01 |
| pcp_2_2003        | -1.500790e-02            | -5.834030e-03                   | 0.000000e+00            |     | 0.000000e+00                      | 3.269230e-07       | -9.939640e-02 |
| pcp_2_2004        | 0.000000e+00             | 0.000000e+00                    | 1.655290e-04            |     | 5.554880e-04                      | -2.051950e-05      | 0.000000e+00  |
| pcp_2_2005        | 0.000000e+00             | 0.000000e+00                    | -8.112040e-03           |     | 7.660870e-04                      | -5.193580e-04      | 0.000000e+00  |
| pcp_2_2006        | 0.000000e+00             | 0.000000e+00                    | -4.289900e-03           |     | 1.061180e-03                      | 8.210900e-05       | 0.000000e+00  |
| pcp_2_2007        | 0.000000e+00             | 0.000000e+00                    | -2.485160e-02           |     | 2.818910e-03                      | -3.107620e-04      | 0.000000e+00  |
| pcp_2_2008        | 0.000000e+00             | 0.000000e+00                    | 7.399280e-04            |     | -3.919010e-04                     | 5.834690e-04       | 0.000000e+00  |
| pcp_2_2009        | 0.000000e+00             | 0.000000e+00                    | -1.244600e-02           |     | 8.158800e-04                      | -6.182750e-04      | 0.000000e+00  |
| pcp_2_2010        | 0.000000e+00             | 0.000000e+00                    | -2.016920e-02           |     | 1.131580e-03                      | -1.210060e-03      | 0.000000e+00  |
| pcp_3_2001        | 1.008550e-02             | 3.668220e-04                    | 0.000000e+00            |     | 0.000000e+00                      | -4.128370e-06      | -1.738400e-02 |
| pcp_3_2002        | -2.774650e-01            | 1.452910e-01                    | 0.000000e+00            |     | 0.000000e+00                      | 4.731250e-06       | -2.732110e+01 |

Continued on next page

| control file name | pretreat ET-precip ratio | pretreat discharge-precip ratio | post-treat precip ratio | ET- | post-treat discharge-precip ratio | post-treat ET ratio | diff | NSE           |
|-------------------|--------------------------|---------------------------------|-------------------------|-----|-----------------------------------|---------------------|------|---------------|
| pcp_3_2003        | -8.496690e-02            | 1.643250e-02                    | 0.000000e+00            |     | 0.000000e+00                      | 1.377400e-06        |      | -1.471750e+00 |
| pcp_3_2004        | 0.000000e+00             | 0.000000e+00                    | 2.904330e-04            |     | 2.393360e-03                      | -3.933920e-05       |      | 0.000000e+00  |
| pcp_3_2005        | 0.000000e+00             | 0.000000e+00                    | -3.825400e-02           |     | 1.881270e-02                      | -2.172020e-03       |      | 0.000000e+00  |
| pcp_3_2006        | 0.000000e+00             | 0.000000e+00                    | -4.691180e-02           |     | 3.246010e-02                      | -3.436850e-03       |      | 0.000000e+00  |
| pcp_3_2007        | 0.000000e+00             | 0.000000e+00                    | -1.430380e-01           |     | 6.356420e-02                      | -1.318280e-03       |      | 0.000000e+00  |
| pcp_3_2008        | 0.000000e+00             | 0.000000e+00                    | -2.270850e-02           |     | 1.213220e-02                      | 1.383100e-04        |      | 0.000000e+00  |
| pcp_3_2009        | 0.000000e+00             | 0.000000e+00                    | -6.640870e-02           |     | 2.508880e-02                      | -4.035160e-03       |      | 0.000000e+00  |
| pcp_3_2010        | 0.000000e+00             | 0.000000e+00                    | -7.135220e-02           |     | 2.454520e-02                      | -3.961940e-03       |      | 0.000000e+00  |
| rcharg_dp_01      | 0.000000e+00             | -1.487180e-05                   | 0.000000e+00            |     | -1.266030e-05                     | 0.000000e+00        |      | 7.051280e-05  |
| rcharg_dp_02      | 0.000000e+00             | -2.612180e-05                   | 0.000000e+00            |     | -2.282050e-05                     | 0.000000e+00        |      | 2.884610e-05  |
| rcharg_dp_03      | 0.000000e+00             | -1.093590e-04                   | 0.000000e+00            |     | -1.054810e-04                     | 0.000000e+00        |      | 2.371790e-04  |
| rcharg_dp_04      | 0.000000e+00             | -4.583330e-06                   | 0.000000e+00            |     | -1.154490e-05                     | 0.000000e+00        |      | 6.410260e-06  |
| rcharg_dp_05      | 0.000000e+00             | -1.195510e-04                   | 0.000000e+00            |     | -2.048110e-04                     | 0.000000e+00        |      | 3.173080e-04  |
| rcharg_dp_06      | 0.000000e+00             | -1.442310e-04                   | 0.000000e+00            |     | -2.514010e-04                     | 0.000000e+00        |      | 3.750000e-04  |
| rcharg_dp_07      | 0.000000e+00             | -1.623720e-04                   | 0.000000e+00            |     | -3.185220e-04                     | 0.000000e+00        |      | 5.032050e-04  |
| rcharg_dp_08      | 0.000000e+00             | -1.762820e-06                   | 0.000000e+00            |     | -9.294870e-07                     | 0.000000e+00        |      | 3.525640e-05  |
| rcharg_dp_09      | 0.000000e+00             | -2.339740e-06                   | 0.000000e+00            |     | -3.012820e-06                     | 0.000000e+00        |      | 0.000000e+00  |
| rcharg_dp_10      | 0.000000e+00             | -5.128200e-07                   | 0.000000e+00            |     | -7.371790e-07                     | 0.000000e+00        |      | 0.000000e+00  |
| rcharg_dp_11      | 0.000000e+00             | -3.535260e-05                   | 0.000000e+00            |     | -6.676280e-05                     | 0.000000e+00        |      | 2.532050e-04  |
| rcharg_dp_12      | 0.000000e+00             | -1.361120e-04                   | 0.000000e+00            |     | -1.717600e-04                     | 0.000000e+00        |      | 5.459300e-04  |
| rcharg_dp_13      | 0.000000e+00             | -7.673080e-05                   | 0.000000e+00            |     | -1.626920e-04                     | 0.000000e+00        |      | 3.333330e-04  |
| rcharg_dp_14      | 0.000000e+00             | -1.945510e-05                   | 0.000000e+00            |     | -4.316670e-05                     | 0.000000e+00        |      | 9.935900e-05  |

Continued on next page

| control file name | pretreat ET-precip ratio | pretreat discharge-precip ratio | post-treat precip ratio | ET- | post-treat discharge-precip ratio | post-treat ET ratio | diff | NSE          |
|-------------------|--------------------------|---------------------------------|-------------------------|-----|-----------------------------------|---------------------|------|--------------|
| rcharg_dp_15      | 0.000000e+00             | -1.987180e-06                   | 0.000000e+00            |     | -1.891030e-06                     | 0.000000e+00        |      | 3.205130e-06 |
| rcharg_dp_16      | 0.000000e+00             | -5.544870e-06                   | 0.000000e+00            |     | -4.679490e-06                     | 0.000000e+00        |      | 6.410260e-06 |
| rcharg_dp_17      | 0.000000e+00             | -3.519230e-05                   | 0.000000e+00            |     | -3.060900e-05                     | 0.000000e+00        |      | 1.185900e-04 |
| rcharg_dp_18      | 0.000000e+00             | -2.983010e-04                   | 0.000000e+00            |     | -1.477560e-04                     | 0.000000e+00        |      | 1.105770e-03 |
| rcharg_dp_19      | 0.000000e+00             | -7.227560e-05                   | 0.000000e+00            |     | -5.528840e-05                     | 0.000000e+00        |      | 3.653850e-04 |
| rcharg_dp_20      | 0.000000e+00             | -5.268910e-04                   | 0.000000e+00            |     | -3.336540e-04                     | 0.000000e+00        |      | 1.634610e-03 |
| rcharg_dp_21      | 0.000000e+00             | -2.958010e-04                   | 0.000000e+00            |     | -6.241730e-04                     | 0.000000e+00        |      | 8.076920e-04 |
| rcharg_dp_22      | 0.000000e+00             | -4.893970e-04                   | 0.000000e+00            |     | -7.195380e-04                     | 0.000000e+00        |      | 1.089010e-03 |
| rcharg_dp_23      | 0.000000e+00             | -2.108970e-05                   | 0.000000e+00            |     | -2.227560e-05                     | 0.000000e+00        |      | 8.333330e-05 |
| rcharg_dp_24      | 0.000000e+00             | -3.849360e-05                   | 0.000000e+00            |     | -1.305800e-04                     | 0.000000e+00        |      | 9.935890e-05 |
| rcharg_dp_25      | 0.000000e+00             | -2.855770e-05                   | 0.000000e+00            |     | -3.134620e-05                     | 0.000000e+00        |      | 8.333330e-05 |
| rcharg_dp_26      | 0.000000e+00             | -3.205130e-07                   | 0.000000e+00            |     | -6.250000e-07                     | 0.000000e+00        |      | 0.000000e+00 |
| rcharg_dp_27      | 0.000000e+00             | -1.772440e-05                   | 0.000000e+00            |     | -6.060900e-05                     | 0.000000e+00        |      | 1.602560e-05 |
| rcharg_dp_28      | 0.000000e+00             | -1.112180e-05                   | 0.000000e+00            |     | -1.125000e-05                     | 0.000000e+00        |      | 6.730770e-05 |
| rcharg_dp_29      | 0.000000e+00             | -2.564100e-07                   | 0.000000e+00            |     | -9.134610e-07                     | 0.000000e+00        |      | 0.000000e+00 |
| rcharg_dp_30      | 0.000000e+00             | -7.051280e-07                   | 0.000000e+00            |     | -5.115390e-06                     | 0.000000e+00        |      | 0.000000e+00 |
| rcharg_dp_31      | 0.000000e+00             | -2.948720e-06                   | 0.000000e+00            |     | -2.596150e-06                     | 0.000000e+00        |      | 6.410260e-06 |
| rcharg_dp_32      | 0.000000e+00             | -8.306120e-04                   | 0.000000e+00            |     | -7.912400e-04                     | 0.000000e+00        |      | 1.642050e-03 |
| rcharg_dp_33      | 0.000000e+00             | -3.501920e-04                   | 0.000000e+00            |     | -6.240870e-04                     | 0.000000e+00        |      | 1.121790e-03 |
| rcharg_dp_34      | 0.000000e+00             | -5.901920e-04                   | 0.000000e+00            |     | -9.830510e-04                     | 0.000000e+00        |      | 1.740390e-03 |
| rcharg_dp_35      | 0.000000e+00             | -2.467950e-05                   | 0.000000e+00            |     | -6.374360e-05                     | 0.000000e+00        |      | 9.615380e-05 |
| rcharg_dp_36      | 0.000000e+00             | -1.246790e-05                   | 0.000000e+00            |     | -6.634610e-06                     | 0.000000e+00        |      | 5.128200e-05 |

Continued on next page

| control file name | pretreat ET-precip ratio | pretreat discharge-precip ratio | post-treat precip ratio | ET- | post-treat discharge-precip ratio | post-treat ET ratio | diff | NSE          |
|-------------------|--------------------------|---------------------------------|-------------------------|-----|-----------------------------------|---------------------|------|--------------|
| rcharg_dp_37      | 0.000000e+00             | -3.429490e-06                   | 0.000000e+00            |     | -1.153850e-06                     | 0.000000e+00        |      | 1.153850e-04 |
| rcharg_dp_38      | 0.000000e+00             | -1.091350e-04                   | 0.000000e+00            |     | -2.198910e-04                     | 0.000000e+00        |      | 4.198720e-04 |
| rcharg_dp_39      | 0.000000e+00             | -2.339740e-05                   | 0.000000e+00            |     | -1.272440e-05                     | 0.000000e+00        |      | 1.153850e-04 |
| rcharg_dp_40      | 0.000000e+00             | -1.336540e-05                   | 0.000000e+00            |     | -9.679490e-06                     | 0.000000e+00        |      | 1.602560e-05 |
| rcharg_dp_41      | 0.000000e+00             | -2.243590e-06                   | 0.000000e+00            |     | -2.019230e-06                     | 0.000000e+00        |      | 0.000000e+00 |
| rcharg_dp_42      | 0.000000e+00             | -3.461540e-06                   | 0.000000e+00            |     | -2.884620e-06                     | 0.000000e+00        |      | 3.205130e-06 |
| rcharg_dp_43      | 0.000000e+00             | -4.358980e-06                   | 0.000000e+00            |     | -3.493590e-06                     | 0.000000e+00        |      | 6.410260e-06 |
| rcharg_dp_44      | 0.000000e+00             | -8.653840e-07                   | 0.000000e+00            |     | -8.974360e-07                     | 0.000000e+00        |      | 0.000000e+00 |
| rcharg_dp_45      | 0.000000e+00             | -2.692310e-06                   | 0.000000e+00            |     | -2.435900e-06                     | 0.000000e+00        |      | 6.410260e-06 |
| rcharg_dp_46      | 0.000000e+00             | -5.865380e-06                   | 0.000000e+00            |     | -5.641020e-06                     | 0.000000e+00        |      | 6.410260e-06 |
| rcharg_dp_47      | 0.000000e+00             | -3.016030e-05                   | 0.000000e+00            |     | -7.212820e-05                     | 0.000000e+00        |      | 5.448720e-05 |
| rcharg_dp_v       | 0.000000e+00             | -7.411880e-03                   | 0.000000e+00            |     | -1.811860e-02                     | 0.000000e+00        |      | 2.524050e-02 |
| revapmn_01        | 0.000000e+00             | 0.000000e+00                    | 0.000000e+00            |     | 0.000000e+00                      | 0.000000e+00        |      | 0.000000e+00 |
| revapmn_02        | 0.000000e+00             | 0.000000e+00                    | 0.000000e+00            |     | 0.000000e+00                      | 0.000000e+00        |      | 0.000000e+00 |
| revapmn_03        | 0.000000e+00             | 0.000000e+00                    | 0.000000e+00            |     | 0.000000e+00                      | 0.000000e+00        |      | 0.000000e+00 |
| revapmn_04        | 0.000000e+00             | 0.000000e+00                    | 0.000000e+00            |     | 0.000000e+00                      | 0.000000e+00        |      | 0.000000e+00 |
| revapmn_05        | 0.000000e+00             | 0.000000e+00                    | 0.000000e+00            |     | 0.000000e+00                      | 0.000000e+00        |      | 0.000000e+00 |
| revapmn_06        | 0.000000e+00             | 0.000000e+00                    | 0.000000e+00            |     | 0.000000e+00                      | 0.000000e+00        |      | 0.000000e+00 |
| revapmn_07        | 0.000000e+00             | 0.000000e+00                    | 0.000000e+00            |     | 0.000000e+00                      | 0.000000e+00        |      | 0.000000e+00 |
| revapmn_08        | 0.000000e+00             | 0.000000e+00                    | 0.000000e+00            |     | 0.000000e+00                      | 0.000000e+00        |      | 0.000000e+00 |
| revapmn_09        | 0.000000e+00             | 0.000000e+00                    | 0.000000e+00            |     | 0.000000e+00                      | 0.000000e+00        |      | 0.000000e+00 |
| revapmn_10        | 0.000000e+00             | 0.000000e+00                    | 0.000000e+00            |     | 0.000000e+00                      | 0.000000e+00        |      | 0.000000e+00 |

Continued on next page



| control file name | pretreat ET-precip ratio | pretreat discharge-precip ratio | post-treat ET-precip ratio | ET-discharge-precip ratio | post-treat ET diff | NSE          |
|-------------------|--------------------------|---------------------------------|----------------------------|---------------------------|--------------------|--------------|
| revapmn_11        | 0.000000e+00             | 0.000000e+00                    | 0.000000e+00               | 0.000000e+00              | 0.000000e+00       | 0.000000e+00 |
| revapmn_12        | 0.000000e+00             | 0.000000e+00                    | 0.000000e+00               | 0.000000e+00              | 0.000000e+00       | 0.000000e+00 |
| revapmn_13        | 0.000000e+00             | 0.000000e+00                    | 0.000000e+00               | 0.000000e+00              | 0.000000e+00       | 0.000000e+00 |
| revapmn_14        | 0.000000e+00             | 0.000000e+00                    | 0.000000e+00               | 0.000000e+00              | 0.000000e+00       | 0.000000e+00 |
| revapmn_15        | 0.000000e+00             | 0.000000e+00                    | 0.000000e+00               | 0.000000e+00              | 0.000000e+00       | 0.000000e+00 |
| revapmn_16        | 0.000000e+00             | 0.000000e+00                    | 0.000000e+00               | 0.000000e+00              | 0.000000e+00       | 0.000000e+00 |
| revapmn_17        | 0.000000e+00             | 0.000000e+00                    | 0.000000e+00               | 0.000000e+00              | 0.000000e+00       | 0.000000e+00 |
| revapmn_18        | 0.000000e+00             | 0.000000e+00                    | 0.000000e+00               | 0.000000e+00              | 0.000000e+00       | 0.000000e+00 |
| revapmn_19        | 0.000000e+00             | 0.000000e+00                    | 0.000000e+00               | 0.000000e+00              | 0.000000e+00       | 0.000000e+00 |
| revapmn_20        | 0.000000e+00             | 0.000000e+00                    | 0.000000e+00               | 0.000000e+00              | 0.000000e+00       | 0.000000e+00 |
| revapmn_21        | 0.000000e+00             | 0.000000e+00                    | 0.000000e+00               | 0.000000e+00              | 0.000000e+00       | 0.000000e+00 |
| revapmn_22        | 0.000000e+00             | 0.000000e+00                    | 0.000000e+00               | 0.000000e+00              | 0.000000e+00       | 0.000000e+00 |
| revapmn_23        | 0.000000e+00             | 0.000000e+00                    | 0.000000e+00               | 0.000000e+00              | 0.000000e+00       | 0.000000e+00 |
| revapmn_24        | 0.000000e+00             | 0.000000e+00                    | 0.000000e+00               | 0.000000e+00              | 0.000000e+00       | 0.000000e+00 |
| revapmn_25        | 0.000000e+00             | 0.000000e+00                    | 0.000000e+00               | 0.000000e+00              | 0.000000e+00       | 0.000000e+00 |
| revapmn_26        | 0.000000e+00             | 0.000000e+00                    | 0.000000e+00               | 0.000000e+00              | 0.000000e+00       | 0.000000e+00 |
| revapmn_27        | 0.000000e+00             | 0.000000e+00                    | 0.000000e+00               | 0.000000e+00              | 0.000000e+00       | 0.000000e+00 |
| revapmn_28        | 0.000000e+00             | 0.000000e+00                    | 0.000000e+00               | 0.000000e+00              | 0.000000e+00       | 0.000000e+00 |
| revapmn_29        | 0.000000e+00             | 0.000000e+00                    | 0.000000e+00               | 0.000000e+00              | 0.000000e+00       | 0.000000e+00 |
| revapmn_30        | 0.000000e+00             | 0.000000e+00                    | 0.000000e+00               | 0.000000e+00              | 0.000000e+00       | 0.000000e+00 |
| revapmn_31        | 0.000000e+00             | 0.000000e+00                    | 0.000000e+00               | 0.000000e+00              | 0.000000e+00       | 0.000000e+00 |
| revapmn_32        | 0.000000e+00             | 0.000000e+00                    | 0.000000e+00               | 0.000000e+00              | 0.000000e+00       | 0.000000e+00 |

Continued on next page

| control file name | pretreat ET-precip ratio | pretreat discharge-precip ratio | post-treat ET-precip ratio | ET-discharge-precip ratio | post-treat ET diff | NSE           |
|-------------------|--------------------------|---------------------------------|----------------------------|---------------------------|--------------------|---------------|
| revapmn_33        | 0.000000e+00             | 0.000000e+00                    | 0.000000e+00               | 0.000000e+00              | 0.000000e+00       | 0.000000e+00  |
| revapmn_34        | 0.000000e+00             | 0.000000e+00                    | 0.000000e+00               | 0.000000e+00              | 0.000000e+00       | 0.000000e+00  |
| revapmn_35        | 0.000000e+00             | 0.000000e+00                    | 0.000000e+00               | 0.000000e+00              | 0.000000e+00       | 0.000000e+00  |
| revapmn_36        | 0.000000e+00             | 0.000000e+00                    | 0.000000e+00               | 0.000000e+00              | 0.000000e+00       | 0.000000e+00  |
| revapmn_37        | 0.000000e+00             | 0.000000e+00                    | 0.000000e+00               | 0.000000e+00              | 0.000000e+00       | 0.000000e+00  |
| revapmn_38        | 0.000000e+00             | 0.000000e+00                    | 0.000000e+00               | 0.000000e+00              | 0.000000e+00       | 0.000000e+00  |
| revapmn_39        | 0.000000e+00             | 0.000000e+00                    | 0.000000e+00               | 0.000000e+00              | 0.000000e+00       | 0.000000e+00  |
| revapmn_40        | 0.000000e+00             | 0.000000e+00                    | 0.000000e+00               | 0.000000e+00              | 0.000000e+00       | 0.000000e+00  |
| revapmn_41        | 0.000000e+00             | 0.000000e+00                    | 0.000000e+00               | 0.000000e+00              | 0.000000e+00       | 0.000000e+00  |
| revapmn_42        | 0.000000e+00             | 0.000000e+00                    | 0.000000e+00               | 0.000000e+00              | 0.000000e+00       | 0.000000e+00  |
| revapmn_43        | 0.000000e+00             | 0.000000e+00                    | 0.000000e+00               | 0.000000e+00              | 0.000000e+00       | 0.000000e+00  |
| revapmn_44        | 0.000000e+00             | 0.000000e+00                    | 0.000000e+00               | 0.000000e+00              | 0.000000e+00       | 0.000000e+00  |
| revapmn_45        | 0.000000e+00             | 0.000000e+00                    | 0.000000e+00               | 0.000000e+00              | 0.000000e+00       | 0.000000e+00  |
| revapmn_46        | 0.000000e+00             | 0.000000e+00                    | 0.000000e+00               | 0.000000e+00              | 0.000000e+00       | 0.000000e+00  |
| revapmn_47        | 0.000000e+00             | 0.000000e+00                    | 0.000000e+00               | 0.000000e+00              | 0.000000e+00       | 0.000000e+00  |
| revapmn_v         | 0.000000e+00             | 1.655140e-06                    | 0.000000e+00               | 1.172300e-06              | 0.000000e+00       | -1.487180e-05 |
| sbsubbsn_01       | 1.397440e-05             | -6.573400e-05                   | 2.637820e-05               | -6.095830e-05             | -8.009610e-07      | 4.959290e-04  |
| sbsubbsn_02       | 5.115380e-05             | -2.420540e-04                   | 8.185900e-05               | -2.023270e-04             | -1.006730e-05      | 1.946700e-03  |
| sbsubbsn_03       | 8.707690e-04             | -2.306310e-03                   | 1.018400e-03               | -1.967670e-03             | -6.207370e-05      | 5.801760e-02  |
| sbsubbsn_04       | 3.205130e-07             | -1.291350e-05                   | 4.871800e-06               | -7.375000e-06             | -3.348400e-06      | 1.452880e-04  |
| sbsubbsn_05       | 1.426600e-04             | -5.394490e-04                   | 1.647440e-04               | -4.436990e-04             | -4.287720e-05      | 6.896320e-03  |
| sbsubbsn_06       | 2.083330e-05             | -1.062150e-04                   | 3.067310e-05               | -7.760580e-05             | -9.903850e-06      | 1.247470e-03  |

Continued on next page

| control file name | pretreat ET-precip ratio | pretreat discharge-precip ratio | post-treat precip ratio | ET- | post-treat discharge-precip ratio | post-treat ET diff | NSE           |
|-------------------|--------------------------|---------------------------------|-------------------------|-----|-----------------------------------|--------------------|---------------|
| sbsubbsn_07       | 3.314100e-05             | -2.657020e-04                   | 4.301280e-05            |     | -1.499330e-04                     | -1.923650e-09      | 4.755990e-03  |
| sbsubbsn_08       | 1.602560e-07             | -3.387820e-06                   | 1.282050e-07            |     | -2.032050e-06                     | 9.121800e-07       | 4.121790e-05  |
| sbsubbsn_09       | 2.243590e-06             | -9.923080e-06                   | 4.871800e-06            |     | -7.230770e-06                     | -6.650640e-07      | 1.031730e-04  |
| sbsubbsn_10       | 0.000000e+00             | -2.073720e-06                   | 0.000000e+00            |     | -4.935900e-07                     | 8.557690e-08       | 9.692310e-05  |
| sbsubbsn_11       | 1.900640e-05             | -1.554260e-04                   | 3.599360e-05            |     | -1.314810e-04                     | -7.038460e-06      | 3.726990e-03  |
| sbsubbsn_12       | 1.130450e-04             | -6.015420e-04                   | 1.726280e-04            |     | -4.870260e-04                     | -4.676610e-06      | 1.478320e-02  |
| sbsubbsn_13       | 1.457690e-04             | -8.157500e-04                   | 2.210580e-04            |     | -6.826310e-04                     | -3.346060e-05      | 2.633980e-02  |
| sbsubbsn_14       | 2.102560e-05             | -9.541350e-05                   | 2.096150e-05            |     | -6.700000e-05                     | 2.195510e-06       | 1.060450e-03  |
| sbsubbsn_15       | 8.878200e-06             | -2.099040e-05                   | 6.730770e-06            |     | -1.472120e-05                     | -4.345190e-06      | 1.978850e-04  |
| sbsubbsn_16       | 2.871790e-05             | -1.191150e-04                   | 3.964740e-05            |     | -8.593590e-05                     | -8.118590e-06      | 4.135900e-03  |
| sbsubbsn_17       | 4.865380e-05             | -2.707720e-04                   | 6.250000e-05            |     | -1.681700e-04                     | -9.158340e-06      | 1.137960e-02  |
| sbsubbsn_18       | 2.112310e-03             | -7.228720e-03                   | 3.163210e-03            |     | -5.583790e-03                     | -5.319780e-04      | 1.868540e-01  |
| sbsubbsn_19       | 1.401920e-04             | -8.199260e-04                   | 2.188460e-04            |     | -6.468850e-04                     | 1.710900e-05       | 1.864850e-02  |
| sbsubbsn_20       | 7.202560e-04             | -1.686840e-03                   | 9.364420e-04            |     | -1.522440e-03                     | -9.298140e-05      | 1.506640e-02  |
| sbsubbsn_21       | 1.760260e-04             | -1.196870e-03                   | 2.303210e-04            |     | -9.098590e-04                     | -2.996380e-05      | 2.080830e-02  |
| sbsubbsn_22       | 8.016030e-05             | -4.356030e-04                   | 8.169870e-05            |     | -2.703530e-04                     | -1.494620e-05      | 2.890550e-03  |
| sbsubbsn_23       | 2.948720e-06             | -1.927560e-05                   | 6.442310e-06            |     | -1.139100e-05                     | 2.214740e-06       | 2.652560e-04  |
| sbsubbsn_24       | 1.560900e-05             | -3.979170e-05                   | 1.849360e-05            |     | -3.872760e-05                     | -3.475000e-06      | -2.289390e-03 |
| sbsubbsn_25       | 4.192310e-05             | -1.141700e-04                   | 4.403850e-05            |     | -1.009170e-04                     | -6.476920e-06      | -1.905990e-03 |
| sbsubbsn_26       | 0.000000e+00             | -9.743590e-07                   | 0.000000e+00            |     | -5.480770e-07                     | 1.185900e-07       | 6.987180e-06  |
| sbsubbsn_27       | 1.487180e-05             | -8.101920e-05                   | 2.631410e-05            |     | -7.039100e-05                     | -2.578530e-06      | 4.808010e-04  |
| sbsubbsn_28       | 4.262820e-06             | -4.237180e-06                   | 5.320510e-06            |     | -1.316990e-05                     | -1.519230e-06      | -2.453970e-03 |

Continued on next page

| control file name | pretreat ET-precip ratio | pretreat discharge-precip ratio | post-treat precip ratio | ET- | post-treat discharge-precip ratio | post-treat ET ratio | diff | NSE           |
|-------------------|--------------------------|---------------------------------|-------------------------|-----|-----------------------------------|---------------------|------|---------------|
| sbsubbsn_29       | 1.282050e-07             | -1.282050e-08                   | 0.000000e+00            |     | -1.955130e-07                     | 7.371800e-07        |      | 3.205130e-08  |
| sbsubbsn_30       | 0.000000e+00             | -4.439100e-06                   | 9.615380e-08            |     | -1.980770e-06                     | 9.166670e-08        |      | 1.686220e-04  |
| sbsubbsn_31       | 5.096150e-06             | -3.043910e-05                   | 5.897440e-06            |     | -2.394870e-05                     | -1.407690e-06       |      | 3.021800e-04  |
| sbsubbsn_32       | 4.750320e-04             | -3.683470e-03                   | 6.920510e-04            |     | -2.698420e-03                     | -6.870390e-05       |      | 1.207980e-01  |
| sbsubbsn_33       | 3.869230e-04             | -1.678370e-03                   | 4.908980e-04            |     | -1.275210e-03                     | -2.897370e-05       |      | 3.928400e-02  |
| sbsubbsn_34       | 9.025320e-04             | -5.204230e-03                   | 1.240830e-03            |     | -4.314120e-03                     | -9.090870e-05       |      | 2.014130e-01  |
| sbsubbsn_35       | 7.137820e-05             | -2.149200e-04                   | 7.330130e-05            |     | -1.723400e-04                     | -1.894210e-07       |      | 5.133400e-03  |
| sbsubbsn_36       | 4.016030e-05             | -8.796150e-05                   | 2.448720e-05            |     | -7.389100e-05                     | -9.358960e-08       |      | 1.056860e-03  |
| sbsubbsn_37       | 2.512820e-05             | -6.295190e-05                   | 2.323720e-05            |     | -5.662180e-05                     | 6.180770e-06        |      | 9.141350e-04  |
| sbsubbsn_38       | 1.064260e-03             | -2.827880e-03                   | 1.239130e-03            |     | -2.357040e-03                     | -1.088560e-04       |      | 8.173880e-02  |
| sbsubbsn_39       | 8.868590e-05             | -2.348400e-04                   | 9.330130e-05            |     | -1.874010e-04                     | -7.693910e-06       |      | 2.566600e-03  |
| sbsubbsn_40       | 2.855770e-05             | -7.656090e-05                   | 1.990380e-05            |     | -5.883650e-05                     | 5.102880e-06        |      | 3.284940e-04  |
| sbsubbsn_41       | 9.519230e-06             | -1.343590e-05                   | 7.019230e-06            |     | -1.264100e-05                     | 4.573720e-07        |      | 1.527240e-04  |
| sbsubbsn_42       | 8.269230e-06             | -1.147440e-05                   | 9.743590e-06            |     | -1.510580e-05                     | 4.410260e-07        |      | -5.211540e-05 |
| sbsubbsn_43       | 6.666670e-06             | -1.593590e-05                   | 7.147440e-06            |     | -1.209290e-05                     | -2.754490e-06       |      | 1.841350e-04  |
| sbsubbsn_44       | 1.602560e-07             | -6.410280e-08                   | 2.243590e-07            |     | -7.019230e-07                     | 1.866670e-06        |      | 2.891030e-05  |
| sbsubbsn_45       | 9.935900e-07             | -7.673080e-06                   | 2.115380e-06            |     | -5.435900e-06                     | -3.525600e-08       |      | 1.094550e-04  |
| sbsubbsn_46       | 5.320510e-06             | -4.287500e-05                   | 4.967950e-06            |     | -2.905770e-05                     | 4.850960e-06        |      | 2.047760e-04  |
| sbsubbsn_47       | 1.634620e-05             | -2.076190e-04                   | 2.480770e-05            |     | -1.456730e-04                     | -4.358010e-06       |      | 1.046490e-02  |
| sbsubbsn_r        | 8.721890e-03             | -3.264740e-02                   | 1.127720e-02            |     | -2.604260e-02                     | -9.827230e-04       |      | 9.892490e-01  |
| sol_alb_1_01      | -8.900640e-05            | -9.596160e-06                   | -7.048080e-05           |     | 5.429490e-06                      | 6.155140e-06        |      | 3.545830e-04  |
| sol_alb_1_02      | -1.315060e-04            | -5.365390e-06                   | -1.222760e-04           |     | 1.185900e-05                      | 3.149360e-06        |      | 9.374680e-04  |

Continued on next page

| control file name | pretreat ET-precip ratio | pretreat discharge-precip ratio | post-treat precip ratio | ET- | post-treat discharge-precip ratio | post-treat ET ratio | diff | NSE           |
|-------------------|--------------------------|---------------------------------|-------------------------|-----|-----------------------------------|---------------------|------|---------------|
| sol.alb_1.03      | -4.975320e-04            | -9.499990e-06                   | -4.998080e-04           |     | 6.675960e-05                      | -3.069740e-05       |      | 3.605190e-03  |
| sol.alb_1.04      | -2.038460e-05            | -1.028850e-06                   | -1.929490e-05           |     | 1.384620e-06                      | -1.926380e-05       |      | 1.268590e-04  |
| sol.alb_1.05      | -3.442310e-04            | 9.358980e-06                    | -3.580450e-04           |     | 3.513460e-05                      | -2.095830e-05       |      | -2.371470e-04 |
| sol.alb_1.06      | -4.318910e-04            | 4.487180e-06                    | -5.709290e-04           |     | 4.198400e-05                      | -1.883300e-05       |      | 4.994550e-04  |
| sol.alb_1.07      | -4.549680e-04            | -3.478850e-05                   | -5.973400e-04           |     | 6.275640e-05                      | 2.098110e-05        |      | 9.825550e-03  |
| sol.alb_1.08      | -2.471150e-05            | 1.794880e-07                    | -1.211540e-05           |     | 2.467950e-06                      | -1.872120e-06       |      | -9.666670e-05 |
| sol.alb_1.09      | -4.000000e-05            | -1.586540e-06                   | -1.942310e-05           |     | 4.317310e-06                      | -4.618270e-06       |      | -6.730660e-07 |
| sol.alb_1.10      | -1.208330e-05            | 3.141020e-07                    | -5.480770e-06           |     | -1.250000e-07                     | 3.785260e-07        |      | -2.730770e-05 |
| sol.alb_1.11      | -9.676280e-05            | 7.243590e-06                    | -1.143270e-04           |     | 6.169870e-06                      | 5.052560e-05        |      | -6.493590e-05 |
| sol.alb_1.12      | -2.571790e-04            | 8.608970e-06                    | -2.659290e-04           |     | 3.423400e-05                      | 1.276280e-05        |      | 1.739750e-04  |
| sol.alb_1.13      | -1.911860e-04            | 1.403530e-05                    | -1.934620e-04           |     | 1.924040e-05                      | -2.669900e-05       |      | 5.064110e-05  |
| sol.alb_1.14      | -1.004810e-04            | -7.865380e-06                   | -5.054490e-05           |     | 7.179480e-07                      | -4.572400e-05       |      | 7.914420e-04  |
| sol.alb_1.15      | -1.589740e-05            | -4.166660e-07                   | -2.115380e-06           |     | 9.391030e-07                      | -7.781730e-06       |      | 3.525640e-05  |
| sol.alb_1.16      | -4.576920e-05            | -1.291670e-06                   | -2.022440e-05           |     | 2.439100e-06                      | 1.339360e-05        |      | 9.403850e-05  |
| sol.alb_1.17      | -2.133970e-04            | -1.469550e-05                   | -2.019870e-04           |     | 2.375000e-05                      | 2.183810e-05        |      | 1.250670e-03  |
| sol.alb_1.18      | -1.789170e-03            | -2.085260e-05                   | -1.489550e-03           |     | 1.383970e-04                      | 1.343450e-04        |      | 2.141070e-02  |
| sol.alb_1.19      | -5.783010e-04            | -2.672440e-05                   | -6.918590e-04           |     | 4.448720e-05                      | 1.050450e-04        |      | 2.154740e-03  |
| sol.alb_1.20      | -1.436510e-03            | 2.559620e-05                    | -1.324680e-03           |     | 3.336510e-04                      | -4.963430e-05       |      | -7.939200e-05 |
| sol.alb_1.21      | -6.656410e-04            | -2.409290e-05                   | -8.671150e-04           |     | 9.270190e-05                      | 2.158910e-05        |      | 1.069650e-02  |
| sol.alb_1.22      | -1.162470e-03            | 6.479490e-05                    | -1.440510e-03           |     | 2.702820e-04                      | 8.158690e-05        |      | -1.226350e-03 |
| sol.alb_1.23      | -2.094870e-04            | -1.177560e-05                   | -1.541670e-04           |     | 6.637820e-06                      | -1.609940e-05       |      | 3.521480e-03  |
| sol.alb_1.24      | -3.845830e-04            | -3.585260e-05                   | -3.375960e-04           |     | 2.691990e-05                      | 2.514710e-05        |      | 5.012020e-03  |

Continued on next page

| control file name | pretreat ET-precip ratio | pretreat discharge-precip ratio | post-treat precip ratio | ET- | post-treat discharge-precip ratio | post-treat ET ratio | diff | NSE           |
|-------------------|--------------------------|---------------------------------|-------------------------|-----|-----------------------------------|---------------------|------|---------------|
| sol_alb_1_25      | -3.291990e-04            | -3.077880e-05                   | -1.851280e-04           |     | 1.693910e-05                      | -6.297240e-05       |      | 4.542370e-03  |
| sol_alb_1_26      | -2.756410e-06            | -3.525640e-08                   | -2.820510e-06           |     | 1.025640e-07                      | 2.415060e-06        |      | -1.153850e-06 |
| sol_alb_1_27      | -2.090380e-04            | 5.471150e-06                    | -1.757690e-04           |     | 1.632370e-05                      | 1.280450e-06        |      | -3.104170e-04 |
| sol_alb_1_28      | -8.990380e-05            | -7.528840e-06                   | -7.189100e-05           |     | -6.153850e-07                     | 2.743270e-06        |      | -3.660270e-05 |
| sol_alb_1_29      | 1.282050e-07             | 0.000000e+00                    | 9.935900e-07            |     | 3.205130e-09                      | -1.641670e-06       |      | 0.000000e+00  |
| sol_alb_1_30      | 6.089740e-07             | 2.243590e-08                    | -6.410270e-08           |     | 4.166670e-08                      | 4.711540e-07        |      | -3.205130e-08 |
| sol_alb_1_31      | 1.602560e-07             | 3.076920e-07                    | -3.365380e-06           |     | 4.423080e-07                      | -6.355770e-07       |      | -3.525640e-07 |
| sol_alb_1_32      | -9.350960e-04            | 2.256400e-06                    | -1.137790e-03           |     | 1.548460e-04                      | 4.026060e-05        |      | 9.881350e-03  |
| sol_alb_1_33      | -5.577240e-04            | -2.400640e-06                   | -7.514100e-04           |     | 1.504550e-04                      | 9.661280e-05        |      | 1.536280e-03  |
| sol_alb_1_34      | -6.903210e-04            | 5.672760e-05                    | -7.581410e-04           |     | 8.687820e-05                      | 9.525330e-06        |      | 1.533330e-04  |
| sol_alb_1_35      | -1.748080e-04            | -4.961540e-06                   | -1.976920e-04           |     | 1.205130e-06                      | 7.310830e-05        |      | 2.683010e-04  |
| sol_alb_1_36      | -7.435900e-05            | -1.102240e-05                   | -8.096150e-05           |     | -2.134620e-06                     | 3.503940e-05        |      | -1.372120e-04 |
| sol_alb_1_37      | -2.592950e-05            | -9.615350e-08                   | -2.435900e-05           |     | 5.993590e-07                      | 1.015000e-05        |      | -3.224360e-05 |
| sol_alb_1_38      | -1.080380e-03            | -1.620990e-04                   | -8.845190e-04           |     | 1.068430e-04                      | 1.129490e-04        |      | 1.528490e-02  |
| sol_alb_1_39      | -3.181730e-04            | -2.630130e-05                   | -2.275960e-04           |     | 1.467630e-05                      | -3.261030e-05       |      | 1.008170e-03  |
| sol_alb_1_40      | -1.247120e-04            | -9.689100e-06                   | -8.576920e-05           |     | 6.586540e-06                      | 3.839710e-05        |      | -5.324360e-04 |
| sol_alb_1_41      | -3.512820e-05            | 5.596150e-06                    | -3.044870e-06           |     | 2.730770e-06                      | -3.863940e-05       |      | -3.980450e-04 |
| sol_alb_1_42      | -1.012500e-04            | -6.608980e-06                   | -7.503210e-05           |     | 5.448710e-07                      | 2.726470e-05        |      | -3.072120e-04 |
| sol_alb_1_43      | -1.354490e-04            | -2.425000e-05                   | -1.245830e-04           |     | -9.814100e-06                     | 3.959710e-05        |      | -1.877240e-04 |
| sol_alb_1_44      | -2.131410e-05            | 4.173080e-06                    | -2.461540e-05           |     | 3.266030e-06                      | -1.348080e-06       |      | -2.878200e-04 |
| sol_alb_1_45      | -5.237180e-05            | -3.153840e-06                   | -4.009620e-05           |     | -3.349360e-06                     | 7.948080e-06        |      | -4.145510e-04 |
| sol_alb_1_46      | -1.955130e-06            | 2.330130e-06                    | -1.724360e-05           |     | 1.384620e-06                      | 8.227530e-07        |      | -1.459940e-04 |

Continued on next page

| control file name | pretreat ET-precip ratio | pretreat discharge-precip ratio | post-treat ET-precip ratio | ET-discharge-precip ratio | post-treat discharge-precip ratio | post-treat ET diff | NSE |
|-------------------|--------------------------|---------------------------------|----------------------------|---------------------------|-----------------------------------|--------------------|-----|
| sol.alb_1_47      | -6.881410e-05            | 1.141030e-06                    | -8.762820e-05              | 1.810900e-06              | 2.911250e-05                      | 1.047760e-04       |     |
| sol.alb_1_r       | -5.508820e-03            | 1.125020e-05                    | -5.528230e-03              | 6.466410e-04              | 9.960150e-05                      | 3.379130e-02       |     |
| sol.alb_2_01      | 0.000000e+00             | 0.000000e+00                    | 0.000000e+00               | 0.000000e+00              | 0.000000e+00                      | 0.000000e+00       |     |
| sol.alb_2_02      | 0.000000e+00             | 0.000000e+00                    | 0.000000e+00               | 0.000000e+00              | 0.000000e+00                      | 0.000000e+00       |     |
| sol.alb_2_03      | 0.000000e+00             | 0.000000e+00                    | 0.000000e+00               | 0.000000e+00              | 0.000000e+00                      | 0.000000e+00       |     |
| sol.alb_2_04      | 0.000000e+00             | 0.000000e+00                    | 0.000000e+00               | 0.000000e+00              | 0.000000e+00                      | 0.000000e+00       |     |
| sol.alb_2_05      | 0.000000e+00             | 0.000000e+00                    | 0.000000e+00               | 0.000000e+00              | 0.000000e+00                      | 0.000000e+00       |     |
| sol.alb_2_06      | 0.000000e+00             | 0.000000e+00                    | 0.000000e+00               | 0.000000e+00              | 0.000000e+00                      | 0.000000e+00       |     |
| sol.alb_2_07      | 0.000000e+00             | 0.000000e+00                    | 0.000000e+00               | 0.000000e+00              | 0.000000e+00                      | 0.000000e+00       |     |
| sol.alb_2_08      | 0.000000e+00             | 0.000000e+00                    | 0.000000e+00               | 0.000000e+00              | 0.000000e+00                      | 0.000000e+00       |     |
| sol.alb_2_09      | 0.000000e+00             | 0.000000e+00                    | 0.000000e+00               | 0.000000e+00              | 0.000000e+00                      | 0.000000e+00       |     |
| sol.alb_2_10      | 0.000000e+00             | 0.000000e+00                    | 0.000000e+00               | 0.000000e+00              | 0.000000e+00                      | 0.000000e+00       |     |
| sol.alb_2_11      | 0.000000e+00             | 0.000000e+00                    | 0.000000e+00               | 0.000000e+00              | 0.000000e+00                      | 0.000000e+00       |     |
| sol.alb_2_12      | 0.000000e+00             | 0.000000e+00                    | 0.000000e+00               | 0.000000e+00              | 0.000000e+00                      | 0.000000e+00       |     |
| sol.alb_2_13      | 0.000000e+00             | 0.000000e+00                    | 0.000000e+00               | 0.000000e+00              | 0.000000e+00                      | 0.000000e+00       |     |
| sol.alb_2_14      | 0.000000e+00             | 0.000000e+00                    | 0.000000e+00               | 0.000000e+00              | 0.000000e+00                      | 0.000000e+00       |     |
| sol.alb_2_15      | 0.000000e+00             | 0.000000e+00                    | 0.000000e+00               | 0.000000e+00              | 0.000000e+00                      | 0.000000e+00       |     |
| sol.alb_2_16      | 0.000000e+00             | 0.000000e+00                    | 0.000000e+00               | 0.000000e+00              | 0.000000e+00                      | 0.000000e+00       |     |
| sol.alb_2_17      | 0.000000e+00             | 0.000000e+00                    | 0.000000e+00               | 0.000000e+00              | 0.000000e+00                      | 0.000000e+00       |     |
| sol.alb_2_18      | 0.000000e+00             | 0.000000e+00                    | 0.000000e+00               | 0.000000e+00              | 0.000000e+00                      | 0.000000e+00       |     |
| sol.alb_2_19      | 0.000000e+00             | 0.000000e+00                    | 0.000000e+00               | 0.000000e+00              | 0.000000e+00                      | 0.000000e+00       |     |
| sol.alb_2_20      | 0.000000e+00             | 0.000000e+00                    | 0.000000e+00               | 0.000000e+00              | 0.000000e+00                      | 0.000000e+00       |     |

Continued on next page

| control file name | pretreat ET-precip ratio | pretreat discharge-precip ratio | post-treat ET-precip ratio | ET-discharge-precip ratio | post-treat ET diff | NSE          |
|-------------------|--------------------------|---------------------------------|----------------------------|---------------------------|--------------------|--------------|
| sol_alb_2_21      | 0.000000e+00             | 0.000000e+00                    | 0.000000e+00               | 0.000000e+00              | 0.000000e+00       | 0.000000e+00 |
| sol_alb_2_22      | 0.000000e+00             | 0.000000e+00                    | 0.000000e+00               | 0.000000e+00              | 0.000000e+00       | 0.000000e+00 |
| sol_alb_2_23      | 0.000000e+00             | 0.000000e+00                    | 0.000000e+00               | 0.000000e+00              | 0.000000e+00       | 0.000000e+00 |
| sol_alb_2_24      | 0.000000e+00             | 0.000000e+00                    | 0.000000e+00               | 0.000000e+00              | 0.000000e+00       | 0.000000e+00 |
| sol_alb_2_25      | 0.000000e+00             | 0.000000e+00                    | 0.000000e+00               | 0.000000e+00              | 0.000000e+00       | 0.000000e+00 |
| sol_alb_2_26      | 0.000000e+00             | 0.000000e+00                    | 0.000000e+00               | 0.000000e+00              | 0.000000e+00       | 0.000000e+00 |
| sol_alb_2_27      | 0.000000e+00             | 0.000000e+00                    | 0.000000e+00               | 0.000000e+00              | 0.000000e+00       | 0.000000e+00 |
| sol_alb_2_28      | 0.000000e+00             | 0.000000e+00                    | 0.000000e+00               | 0.000000e+00              | 0.000000e+00       | 0.000000e+00 |
| sol_alb_2_29      | 0.000000e+00             | 0.000000e+00                    | 0.000000e+00               | 0.000000e+00              | 0.000000e+00       | 0.000000e+00 |
| sol_alb_2_30      | 0.000000e+00             | 0.000000e+00                    | 0.000000e+00               | 0.000000e+00              | 0.000000e+00       | 0.000000e+00 |
| sol_alb_2_31      | 0.000000e+00             | 0.000000e+00                    | 0.000000e+00               | 0.000000e+00              | 0.000000e+00       | 0.000000e+00 |
| sol_alb_2_32      | 0.000000e+00             | 0.000000e+00                    | 0.000000e+00               | 0.000000e+00              | 0.000000e+00       | 0.000000e+00 |
| sol_alb_2_33      | 0.000000e+00             | 0.000000e+00                    | 0.000000e+00               | 0.000000e+00              | 0.000000e+00       | 0.000000e+00 |
| sol_alb_2_34      | 0.000000e+00             | 0.000000e+00                    | 0.000000e+00               | 0.000000e+00              | 0.000000e+00       | 0.000000e+00 |
| sol_alb_2_35      | 0.000000e+00             | 0.000000e+00                    | 0.000000e+00               | 0.000000e+00              | 0.000000e+00       | 0.000000e+00 |
| sol_alb_2_36      | 0.000000e+00             | 0.000000e+00                    | 0.000000e+00               | 0.000000e+00              | 0.000000e+00       | 0.000000e+00 |
| sol_alb_2_37      | 0.000000e+00             | 0.000000e+00                    | 0.000000e+00               | 0.000000e+00              | 0.000000e+00       | 0.000000e+00 |
| sol_alb_2_38      | 0.000000e+00             | 0.000000e+00                    | 0.000000e+00               | 0.000000e+00              | 0.000000e+00       | 0.000000e+00 |
| sol_alb_2_39      | 0.000000e+00             | 0.000000e+00                    | 0.000000e+00               | 0.000000e+00              | 0.000000e+00       | 0.000000e+00 |
| sol_alb_2_40      | 0.000000e+00             | 0.000000e+00                    | 0.000000e+00               | 0.000000e+00              | 0.000000e+00       | 0.000000e+00 |
| sol_alb_2_41      | 0.000000e+00             | 0.000000e+00                    | 0.000000e+00               | 0.000000e+00              | 0.000000e+00       | 0.000000e+00 |
| sol_alb_2_42      | 0.000000e+00             | 0.000000e+00                    | 0.000000e+00               | 0.000000e+00              | 0.000000e+00       | 0.000000e+00 |

Continued on next page



| control file name | pretreat ET-precip ratio | pretreat discharge-precip ratio | post-treat ET-precip ratio | ET-discharge-precip ratio | post-treat ET diff | NSE          |
|-------------------|--------------------------|---------------------------------|----------------------------|---------------------------|--------------------|--------------|
| sol_alb_2_43      | 0.000000e+00             | 0.000000e+00                    | 0.000000e+00               | 0.000000e+00              | 0.000000e+00       | 0.000000e+00 |
| sol_alb_2_44      | 0.000000e+00             | 0.000000e+00                    | 0.000000e+00               | 0.000000e+00              | 0.000000e+00       | 0.000000e+00 |
| sol_alb_2_45      | 0.000000e+00             | 0.000000e+00                    | 0.000000e+00               | 0.000000e+00              | 0.000000e+00       | 0.000000e+00 |
| sol_alb_2_46      | 0.000000e+00             | 0.000000e+00                    | 0.000000e+00               | 0.000000e+00              | 0.000000e+00       | 0.000000e+00 |
| sol_alb_2_47      | 0.000000e+00             | 0.000000e+00                    | 0.000000e+00               | 0.000000e+00              | 0.000000e+00       | 0.000000e+00 |
| sol_alb_2_r       | 0.000000e+00             | 0.000000e+00                    | 0.000000e+00               | 0.000000e+00              | 0.000000e+00       | 0.000000e+00 |
| sol_alb_3_01      | 0.000000e+00             | 0.000000e+00                    | 0.000000e+00               | 0.000000e+00              | 0.000000e+00       | 0.000000e+00 |
| sol_alb_3_02      | 0.000000e+00             | 0.000000e+00                    | 0.000000e+00               | 0.000000e+00              | 0.000000e+00       | 0.000000e+00 |
| sol_alb_3_03      | 0.000000e+00             | 0.000000e+00                    | 0.000000e+00               | 0.000000e+00              | 0.000000e+00       | 0.000000e+00 |
| sol_alb_3_04      | 0.000000e+00             | 0.000000e+00                    | 0.000000e+00               | 0.000000e+00              | 0.000000e+00       | 0.000000e+00 |
| sol_alb_3_05      | 0.000000e+00             | 0.000000e+00                    | 0.000000e+00               | 0.000000e+00              | 0.000000e+00       | 0.000000e+00 |
| sol_alb_3_06      | 0.000000e+00             | 0.000000e+00                    | 0.000000e+00               | 0.000000e+00              | 0.000000e+00       | 0.000000e+00 |
| sol_alb_3_07      | 0.000000e+00             | 0.000000e+00                    | 0.000000e+00               | 0.000000e+00              | 0.000000e+00       | 0.000000e+00 |
| sol_alb_3_08      | 0.000000e+00             | 0.000000e+00                    | 0.000000e+00               | 0.000000e+00              | 0.000000e+00       | 0.000000e+00 |
| sol_alb_3_09      | 0.000000e+00             | 0.000000e+00                    | 0.000000e+00               | 0.000000e+00              | 0.000000e+00       | 0.000000e+00 |
| sol_alb_3_10      | 0.000000e+00             | 0.000000e+00                    | 0.000000e+00               | 0.000000e+00              | 0.000000e+00       | 0.000000e+00 |
| sol_alb_3_11      | 0.000000e+00             | 0.000000e+00                    | 0.000000e+00               | 0.000000e+00              | 0.000000e+00       | 0.000000e+00 |
| sol_alb_3_12      | 0.000000e+00             | 0.000000e+00                    | 0.000000e+00               | 0.000000e+00              | 0.000000e+00       | 0.000000e+00 |
| sol_alb_3_13      | 0.000000e+00             | 0.000000e+00                    | 0.000000e+00               | 0.000000e+00              | 0.000000e+00       | 0.000000e+00 |
| sol_alb_3_14      | 0.000000e+00             | 0.000000e+00                    | 0.000000e+00               | 0.000000e+00              | 0.000000e+00       | 0.000000e+00 |
| sol_alb_3_15      | 0.000000e+00             | 0.000000e+00                    | 0.000000e+00               | 0.000000e+00              | 0.000000e+00       | 0.000000e+00 |
| sol_alb_3_16      | 0.000000e+00             | 0.000000e+00                    | 0.000000e+00               | 0.000000e+00              | 0.000000e+00       | 0.000000e+00 |

Continued on next page



| control file name | pretreat ET-precip ratio | pretreat discharge-precip ratio | post-treat precip ratio | ET- | post-treat discharge-precip ratio | post-treat ET ratio | diff | NSE           |
|-------------------|--------------------------|---------------------------------|-------------------------|-----|-----------------------------------|---------------------|------|---------------|
| sol_alb_3_39      | 0.000000e+00             | 0.000000e+00                    | 0.000000e+00            |     | 0.000000e+00                      | 0.000000e+00        |      | 0.000000e+00  |
| sol_alb_3_40      | 0.000000e+00             | 0.000000e+00                    | 0.000000e+00            |     | 0.000000e+00                      | 0.000000e+00        |      | 0.000000e+00  |
| sol_alb_3_41      | 0.000000e+00             | 0.000000e+00                    | 0.000000e+00            |     | 0.000000e+00                      | 0.000000e+00        |      | 0.000000e+00  |
| sol_alb_3_42      | 0.000000e+00             | 0.000000e+00                    | 0.000000e+00            |     | 0.000000e+00                      | 0.000000e+00        |      | 0.000000e+00  |
| sol_alb_3_43      | 0.000000e+00             | 0.000000e+00                    | 0.000000e+00            |     | 0.000000e+00                      | 0.000000e+00        |      | 0.000000e+00  |
| sol_alb_3_44      | 0.000000e+00             | 0.000000e+00                    | 0.000000e+00            |     | 0.000000e+00                      | 0.000000e+00        |      | 0.000000e+00  |
| sol_alb_3_45      | 0.000000e+00             | 0.000000e+00                    | 0.000000e+00            |     | 0.000000e+00                      | 0.000000e+00        |      | 0.000000e+00  |
| sol_alb_3_46      | 0.000000e+00             | 0.000000e+00                    | 0.000000e+00            |     | 0.000000e+00                      | 0.000000e+00        |      | 0.000000e+00  |
| sol_alb_3_47      | 0.000000e+00             | 0.000000e+00                    | 0.000000e+00            |     | 0.000000e+00                      | 0.000000e+00        |      | 0.000000e+00  |
| sol_alb_3_r       | 0.000000e+00             | 0.000000e+00                    | 0.000000e+00            |     | 0.000000e+00                      | 0.000000e+00        |      | 0.000000e+00  |
| sol_awc_1_01      | 1.090710e-04             | 8.116670e-05                    | 7.448720e-05            |     | 4.729490e-05                      | 6.528840e-06        |      | -6.358650e-04 |
| sol_awc_1_02      | 6.663140e-04             | -9.881600e-04                   | 7.497120e-04            |     | -8.381830e-04                     | 3.141670e-05        |      | 9.965960e-03  |
| sol_awc_1_03      | 3.776730e-03             | -3.598050e-03                   | 3.861570e-03            |     | -3.244120e-03                     | -3.968910e-05       |      | 3.199570e-02  |
| sol_awc_1_04      | 5.878210e-05             | 5.580130e-06                    | 5.596150e-05            |     | 4.564100e-06                      | 1.228850e-05        |      | -7.525640e-05 |
| sol_awc_1_05      | 5.536540e-04             | -4.734360e-04                   | 7.110900e-04            |     | -3.607920e-04                     | -5.481310e-05       |      | 3.936610e-02  |
| sol_awc_1_06      | 1.480740e-03             | 6.252560e-05                    | 1.394680e-03            |     | -1.318240e-04                     | 4.502880e-05        |      | -4.971700e-03 |
| sol_awc_1_07      | 1.208490e-03             | -1.681150e-04                   | 1.242050e-03            |     | -5.310990e-04                     | -5.790510e-05       |      | -1.548260e-02 |
| sol_awc_1_08      | 3.368590e-05             | 3.522440e-06                    | 4.153850e-05            |     | 2.519230e-06                      | -6.057690e-06       |      | 1.037820e-04  |
| sol_awc_1_09      | 1.301280e-05             | -2.704490e-05                   | 6.650640e-05            |     | -1.491990e-05                     | -4.653530e-05       |      | 9.450640e-04  |
| sol_awc_1_10      | 1.131410e-05             | -6.378210e-07                   | 1.080130e-05            |     | 2.147440e-07                      | 4.163460e-06        |      | 1.553530e-04  |
| sol_awc_1_11      | 4.841990e-04             | -5.658650e-05                   | 4.850000e-04            |     | -6.688780e-05                     | 4.637980e-05        |      | -1.408650e-04 |
| sol_awc_1_12      | 1.465220e-03             | -1.625340e-03                   | 1.824010e-03            |     | -1.481660e-03                     | -4.068200e-05       |      | 4.280120e-02  |

Continued on next page

| control file name | pretreat ET-precip ratio | pretreat discharge-precip ratio | post-treat precip ratio | ET- | post-treat discharge-precip ratio | post-treat ET ratio | diff | NSE           |
|-------------------|--------------------------|---------------------------------|-------------------------|-----|-----------------------------------|---------------------|------|---------------|
| sol_aws_1_13      | 3.048080e-04             | 4.402570e-04                    | 4.063780e-04            |     | 3.684140e-04                      | -2.300640e-05       |      | -2.045150e-02 |
| sol_aws_1_14      | 2.044550e-04             | 1.076930e-06                    | 1.595510e-04            |     | -1.390700e-05                     | -1.419870e-06       |      | -5.678430e-03 |
| sol_aws_1_15      | 4.125000e-05             | -4.221150e-06                   | 4.429490e-05            |     | -7.657050e-06                     | -1.046150e-05       |      | -5.317310e-05 |
| sol_aws_1_16      | 7.067310e-05             | 2.432690e-05                    | 4.381410e-05            |     | 2.466990e-05                      | -6.432700e-06       |      | -9.916340e-04 |
| sol_aws_1_17      | 3.816670e-04             | 6.432370e-05                    | 3.975320e-04            |     | -4.080140e-06                     | 3.095830e-05        |      | 5.201850e-05  |
| sol_aws_1_18      | 2.886410e-03             | -6.932160e-04                   | 1.749550e-03            |     | -1.499790e-03                     | 5.271700e-04        |      | 3.592400e-02  |
| sol_aws_1_19      | 5.256730e-04             | -3.401950e-04                   | 5.270830e-04            |     | -3.269740e-04                     | -2.591670e-05       |      | 7.646410e-03  |
| sol_aws_1_20      | 2.247250e-03             | 9.365280e-03                    | 6.924050e-04            |     | 6.704170e-03                      | 1.089650e-03        |      | -5.641150e-02 |
| sol_aws_1_21      | 1.614420e-03             | 6.951930e-05                    | 1.869130e-03            |     | -3.035190e-04                     | -1.718460e-04       |      | -4.487450e-03 |
| sol_aws_1_22      | -6.523390e-04            | 8.953910e-03                    | -1.525830e-03           |     | 7.190570e-03                      | 7.281650e-04        |      | 9.474510e-02  |
| sol_aws_1_23      | 8.207050e-04             | 3.097440e-05                    | 6.651920e-04            |     | 3.390060e-05                      | -5.487820e-05       |      | 7.365710e-04  |
| sol_aws_1_24      | 1.173460e-03             | 6.359930e-05                    | 1.213720e-03            |     | -2.794860e-06                     | -9.430450e-05       |      | -6.221820e-03 |
| sol_aws_1_25      | 8.497760e-04             | -8.864100e-05                   | 7.342310e-04            |     | -2.158010e-05                     | 1.493270e-05        |      | 1.417630e-03  |
| sol_aws_1_26      | 1.048080e-05             | 6.538460e-07                    | 1.762820e-06            |     | 1.025640e-07                      | 6.535260e-06        |      | -2.875000e-05 |
| sol_aws_1_27      | 5.861220e-04             | 4.078520e-05                    | 5.305770e-04            |     | 2.891990e-05                      | 4.668270e-05        |      | -4.847440e-04 |
| sol_aws_1_28      | 2.440710e-04             | 7.092950e-06                    | 2.630450e-04            |     | -8.778840e-06                     | -6.029490e-05       |      | -4.613400e-03 |
| sol_aws_1_29      | 6.442310e-06             | -6.538460e-07                   | 6.089740e-06            |     | -8.301280e-07                     | 1.608980e-07        |      | 4.679490e-06  |
| sol_aws_1_30      | 2.157050e-05             | -8.605770e-06                   | 1.701920e-05            |     | -9.451920e-06                     | 1.500580e-05        |      | -9.038460e-06 |
| sol_aws_1_31      | 3.836540e-05             | 1.329810e-05                    | 3.317310e-05            |     | 6.596150e-06                      | -1.155100e-05       |      | -1.460260e-04 |
| sol_aws_1_32      | 5.741960e-03             | -5.258320e-03                   | 6.579940e-03            |     | -4.617660e-03                     | -8.927890e-05       |      | -5.340510e-02 |
| sol_aws_1_33      | 1.107850e-03             | 6.977210e-03                    | 1.015290e-03            |     | 5.431560e-03                      | -1.764780e-04       |      | -1.054240e-01 |
| sol_aws_1_34      | 6.887400e-03             | -6.555400e-03                   | 8.586730e-03            |     | -6.356660e-03                     | -4.239390e-04       |      | 1.085130e-01  |

Continued on next page

| control file name | pretreat ET-precip ratio | pretreat discharge-precip ratio | post-treat precip ratio | ET- | post-treat discharge-precip ratio | post-treat ET ratio | diff | NSE           |
|-------------------|--------------------------|---------------------------------|-------------------------|-----|-----------------------------------|---------------------|------|---------------|
| sol.awc_1_35      | 3.905450e-04             | 2.292470e-04                    | 3.753850e-04            |     | 7.746470e-05                      | -6.771160e-05       |      | -1.181740e-02 |
| sol.awc_1_36      | 2.653850e-04             | 1.057180e-04                    | 2.712180e-04            |     | 5.992310e-05                      | -2.962820e-05       |      | -1.834620e-04 |
| sol.awc_1_37      | 1.179490e-05             | 1.122760e-05                    | 2.602560e-05            |     | 1.794870e-07                      | -1.426600e-05       |      | 3.016020e-05  |
| sol.awc_1_38      | 1.485480e-03             | 1.161670e-03                    | 1.441700e-03            |     | 6.299650e-04                      | -3.461860e-05       |      | -3.030040e-02 |
| sol.awc_1_39      | 3.183010e-04             | -2.671310e-04                   | 3.765710e-04            |     | -2.331860e-04                     | 3.660260e-05        |      | 7.985450e-03  |
| sol.awc_1_40      | 2.268910e-04             | -3.696470e-05                   | 2.527560e-04            |     | -5.467630e-05                     | 2.321150e-05        |      | 9.293910e-04  |
| sol.awc_1_41      | 8.631410e-05             | 7.592950e-06                    | 9.846150e-05            |     | 5.458330e-06                      | 2.936860e-05        |      | 2.477560e-04  |
| sol.awc_1_42      | 3.268590e-04             | -8.725960e-05                   | 2.996150e-04            |     | -6.451920e-06                     | -3.832370e-05       |      | 2.834580e-03  |
| sol.awc_1_43      | 4.712180e-04             | 8.273720e-05                    | 4.426280e-04            |     | 3.287500e-05                      | -2.458330e-06       |      | 1.458170e-03  |
| sol.awc_1_44      | 1.733970e-05             | -7.435900e-06                   | 5.583330e-05            |     | 5.833340e-07                      | -8.878210e-06       |      | 4.983970e-05  |
| sol.awc_1_45      | 1.152880e-04             | 2.598080e-05                    | 1.703850e-04            |     | 1.432690e-05                      | -2.147440e-05       |      | 7.268910e-04  |
| sol.awc_1_46      | 1.022760e-04             | -1.069040e-04                   | 1.273720e-04            |     | -1.045480e-04                     | -9.924040e-06       |      | -4.294360e-03 |
| sol.awc_1_47      | 3.125960e-04             | -5.586860e-05                   | 4.257690e-04            |     | -9.709610e-05                     | -6.473040e-05       |      | -9.139460e-03 |
| sol.awc_1_r       | 1.986160e-02             | 4.592420e-03                    | 1.943850e-02            |     | 2.199560e-03                      | 3.894960e-04        |      | -2.950660e-01 |
| sol.awc_2_01      | 6.073720e-05             | 1.045830e-05                    | 5.294870e-05            |     | 4.804490e-06                      | 2.535260e-06        |      | -6.085660e-04 |
| sol.awc_2_02      | 3.368590e-05             | 1.331730e-04                    | 5.512820e-05            |     | 1.274520e-04                      | -1.600960e-05       |      | 1.329150e-02  |
| sol.awc_2_03      | -2.419870e-04            | 1.004270e-03                    | -1.932050e-04           |     | 7.077720e-04                      | -9.160250e-06       |      | 1.213330e-02  |
| sol.awc_2_04      | 3.064100e-05             | 5.653850e-06                    | 1.833330e-05            |     | 3.179490e-06                      | -4.105770e-06       |      | 2.420190e-05  |
| sol.awc_2_05      | 1.533370e-03             | 4.086600e-04                    | 1.445260e-03            |     | 3.290480e-04                      | -1.107280e-05       |      | -9.368560e-03 |
| sol.awc_2_06      | 1.646960e-03             | 1.075000e-04                    | 1.572790e-03            |     | 1.567050e-04                      | 1.657210e-05        |      | -7.299650e-03 |
| sol.awc_2_07      | 2.266920e-03             | 3.890260e-04                    | 2.103850e-03            |     | 3.192470e-04                      | 1.265720e-06        |      | -2.732960e-02 |
| sol.awc_2_08      | 6.698720e-06             | 1.769230e-06                    | 9.166670e-06            |     | 1.894230e-06                      | -2.701920e-06       |      | 3.130840e-05  |

Continued on next page

| control file name | pretreat ET-precip ratio | pretreat discharge-precip ratio | post-treat precip ratio | ET- | post-treat discharge-precip ratio | post-treat ET ratio | diff | NSE           |
|-------------------|--------------------------|---------------------------------|-------------------------|-----|-----------------------------------|---------------------|------|---------------|
| sol.awc_2_09      | 2.294870e-05             | -2.115380e-06                   | 3.076920e-05            |     | -1.868590e-06                     | -1.775640e-06       |      | 1.138710e-04  |
| sol.awc_2_10      | 7.660260e-06             | 1.288460e-06                    | 6.474360e-06            |     | 6.217940e-07                      | 1.435900e-06        |      | -1.897050e-05 |
| sol.awc_2_11      | 3.143590e-04             | -3.120510e-05                   | 3.077880e-04            |     | -3.072110e-05                     | -2.288910e-05       |      | -1.506630e-03 |
| sol.awc_2_12      | 7.164420e-04             | 5.036410e-04                    | 7.807370e-04            |     | 3.239870e-04                      | -4.369460e-05       |      | -3.148460e-02 |
| sol.awc_2_13      | 4.210580e-04             | 9.138010e-04                    | 4.971800e-04            |     | 6.487280e-04                      | 1.362630e-05        |      | -5.410300e-03 |
| sol.awc_2_14      | 1.286860e-04             | -5.428200e-05                   | 1.299040e-04            |     | -2.117310e-05                     | 3.647440e-06        |      | 4.207290e-03  |
| sol.awc_2_15      | 1.730770e-05             | 1.381410e-06                    | 1.708330e-05            |     | 6.570510e-07                      | -1.977560e-06       |      | -1.366250e-04 |
| sol.awc_2_16      | 4.858970e-05             | -4.487820e-05                   | 4.717950e-05            |     | -2.238140e-05                     | -6.121790e-06       |      | 4.753840e-03  |
| sol.awc_2_17      | -1.134940e-04            | 7.341350e-05                    | -7.035260e-05           |     | 5.857370e-05                      | 1.270710e-05        |      | 5.582110e-03  |
| sol.awc_2_18      | 5.956410e-04             | -4.550270e-05                   | 5.512500e-04            |     | 1.852590e-05                      | -1.030030e-04       |      | 4.372170e-02  |
| sol.awc_2_19      | -5.269230e-05            | 4.799100e-04                    | -3.083330e-05           |     | 2.994170e-04                      | 1.663140e-05        |      | 4.045890e-03  |
| sol.awc_2_20      | 6.938400e-03             | 3.053270e-04                    | 5.909260e-03            |     | 6.090190e-04                      | 1.492700e-04        |      | -3.392670e-03 |
| sol.awc_2_21      | 2.804100e-03             | 7.614460e-04                    | 2.644780e-03            |     | 5.354170e-04                      | -6.609000e-05       |      | -9.692460e-02 |
| sol.awc_2_22      | 4.632850e-03             | 2.434680e-04                    | 4.734010e-03            |     | 3.864070e-04                      | -1.601340e-04       |      | -3.602750e-02 |
| sol.awc_2_23      | 2.248080e-04             | 4.304170e-05                    | 2.250960e-04            |     | 4.004490e-05                      | -2.021480e-05       |      | 4.723330e-04  |
| sol.awc_2_24      | 4.070510e-04             | -1.153810e-04                   | 3.872760e-04            |     | -4.425000e-05                     | -2.443590e-05       |      | 1.215520e-03  |
| sol.awc_2_25      | 3.524680e-04             | 1.611220e-05                    | 3.350960e-04            |     | 3.015710e-05                      | -6.466670e-05       |      | 3.546440e-03  |
| sol.awc_2_26      | 1.057690e-06             | -1.137820e-06                   | 4.006410e-06            |     | 2.628210e-07                      | -3.073720e-06       |      | -4.387820e-06 |
| sol.awc_2_27      | 1.798080e-04             | -6.493600e-06                   | 2.050000e-04            |     | -1.176280e-06                     | -1.791670e-05       |      | 4.767280e-04  |
| sol.awc_2_28      | 1.212500e-04             | 2.566030e-05                    | 1.139740e-04            |     | 3.683650e-05                      | -9.442310e-06       |      | 5.819930e-04  |
| sol.awc_2_29      | 4.807690e-06             | -8.814100e-07                   | 1.923080e-06            |     | -7.467950e-07                     | -3.716350e-06       |      | 1.666670e-06  |
| sol.awc_2_30      | 5.929490e-06             | -3.355770e-06                   | 3.173080e-06            |     | 2.564100e-08                      | -1.460260e-06       |      | 7.966990e-05  |

Continued on next page

| control file name | pretreat ET-precip ratio | pretreat discharge-precip ratio | post-treat precip ratio | ET- | post-treat discharge-precip ratio | post-treat ET ratio | diff | NSE           |
|-------------------|--------------------------|---------------------------------|-------------------------|-----|-----------------------------------|---------------------|------|---------------|
| sol.awc_2_31      | 4.711540e-06             | -1.222120e-05                   | -7.115380e-06           |     | -1.983980e-06                     | -8.441030e-06       |      | 5.497980e-04  |
| sol.awc_2_32      | 3.765030e-03             | -9.597400e-05                   | 4.604900e-03            |     | -1.308780e-04                     | -1.066150e-04       |      | -7.721420e-02 |
| sol.awc_2_33      | 2.101830e-03             | 1.156070e-03                    | 2.622600e-03            |     | 6.858880e-04                      | -4.846890e-05       |      | -5.152950e-02 |
| sol.awc_2_34      | 3.566630e-03             | -4.434670e-03                   | 3.944740e-03            |     | -2.757640e-03                     | -3.518240e-05       |      | 1.362980e-01  |
| sol.awc_2_35      | 2.935580e-04             | -8.766670e-05                   | 2.704810e-04            |     | -7.068270e-05                     | -3.706090e-05       |      | -1.492360e-03 |
| sol.awc_2_36      | 1.347760e-04             | 4.016030e-06                    | 1.345510e-04            |     | -1.186220e-05                     | -1.614100e-05       |      | -1.323690e-03 |
| sol.awc_2_37      | 4.323720e-05             | -3.526090e-08                   | 4.557690e-05            |     | 2.467930e-07                      | -2.208010e-05       |      | -1.169520e-04 |
| sol.awc_2_38      | 3.549040e-04             | 1.295850e-03                    | 4.239420e-04            |     | 8.152560e-04                      | -8.969870e-05       |      | 2.077900e-03  |
| sol.awc_2_39      | -7.064100e-05            | 2.975900e-04                    | -1.006410e-05           |     | 2.221760e-04                      | -9.712180e-06       |      | 1.993570e-03  |
| sol.awc_2_40      | 2.166670e-05             | 7.319870e-05                    | 3.891030e-05            |     | 4.435260e-05                      | -1.533970e-05       |      | 6.949420e-04  |
| sol.awc_2_41      | 6.724360e-05             | 9.541670e-06                    | 6.429490e-05            |     | 4.663460e-06                      | -6.647430e-06       |      | -2.179810e-04 |
| sol.awc_2_42      | 1.181410e-04             | 1.791670e-05                    | 7.596160e-05            |     | 1.621150e-05                      | 1.042630e-05        |      | 5.410600e-05  |
| sol.awc_2_43      | 1.488780e-04             | 4.158980e-05                    | 2.057050e-04            |     | 3.564740e-05                      | -3.583010e-05       |      | 3.911190e-04  |
| sol.awc_2_44      | 2.695510e-05             | -1.064100e-06                   | 2.714740e-05            |     | 2.705130e-06                      | -4.358970e-07       |      | 6.784300e-05  |
| sol.awc_2_45      | 2.711540e-05             | 2.788460e-06                    | 5.317310e-05            |     | 4.756410e-06                      | 3.076910e-07        |      | 2.257340e-04  |
| sol.awc_2_46      | 2.878200e-05             | 9.097440e-05                    | 5.413460e-05            |     | 5.733010e-05                      | -1.300800e-05       |      | -1.220480e-03 |
| sol.awc_2_47      | 3.368270e-04             | -2.753180e-06                   | 3.429490e-04            |     | 1.698800e-07                      | -1.830420e-05       |      | -7.878520e-03 |
| sol.awc_2_r       | 1.110580e-02             | 1.576450e-03                    | 1.107560e-02            |     | 1.256590e-03                      | 4.921620e-05        |      | -1.472310e-01 |
| sol.awc_3_01      | 3.653850e-06             | -1.025640e-07                   | 3.108970e-06            |     | 1.269230e-06                      | -1.958330e-07       |      | -2.564100e-07 |
| sol.awc_3_02      | 2.067950e-04             | 1.701600e-05                    | 2.264740e-04            |     | 4.788460e-06                      | 1.745190e-06        |      | -9.287500e-04 |
| sol.awc_3_03      | 8.319230e-04             | 8.186540e-05                    | 8.791030e-04            |     | 1.859620e-05                      | -1.439250e-04       |      | -4.972560e-03 |
| sol.awc_3_04      | 3.900640e-05             | 3.637820e-06                    | 3.477560e-05            |     | 3.121800e-06                      | -4.124680e-06       |      | -1.764740e-04 |

Continued on next page

| control file name | pretreat ET-precip ratio | pretreat discharge-precip ratio | post-treat precip ratio | ET- | post-treat discharge-precip ratio | post-treat ET ratio | diff | NSE           |
|-------------------|--------------------------|---------------------------------|-------------------------|-----|-----------------------------------|---------------------|------|---------------|
| sol.awc_3.05      | 4.361860e-04             | 3.017950e-05                    | 4.623080e-04            |     | 7.435870e-07                      | -5.315690e-06       |      | -1.157980e-03 |
| sol.awc_3.06      | 4.617950e-04             | 1.315710e-05                    | 4.928850e-04            |     | 5.977560e-06                      | -3.809710e-05       |      | -5.501380e-03 |
| sol.awc_3.07      | 6.753530e-04             | 2.647120e-05                    | 6.964740e-04            |     | -3.333330e-06                     | -8.744220e-06       |      | 5.173720e-04  |
| sol.awc_3.08      | 1.602560e-07             | 4.166670e-08                    | 1.121790e-06            |     | -9.711540e-07                     | 3.769230e-07        |      | 0.000000e+00  |
| sol.awc_3.09      | 2.307690e-06             | 2.980770e-07                    | 3.205130e-06            |     | -3.012820e-07                     | -2.692310e-07       |      | 9.615410e-08  |
| sol.awc_3.10      | 0.000000e+00             | 0.000000e+00                    | 6.730770e-07            |     | -1.923080e-08                     | -2.692310e-07       |      | 0.000000e+00  |
| sol.awc_3.11      | 1.749360e-04             | -8.907050e-06                   | 2.085900e-04            |     | -8.586540e-06                     | -1.450010e-06       |      | 3.571950e-03  |
| sol.awc_3.12      | 4.516030e-04             | 2.208010e-05                    | 5.462820e-04            |     | -1.429490e-06                     | -6.306540e-05       |      | -5.429650e-03 |
| sol.awc_3.13      | 3.203850e-04             | 4.282050e-06                    | 3.340710e-04            |     | -4.464740e-06                     | -3.319610e-05       |      | -9.878210e-05 |
| sol.awc_3.14      | 7.115390e-06             | -8.012820e-08                   | 6.634620e-06            |     | 6.602560e-07                      | -2.718590e-06       |      | -3.621800e-06 |
| sol.awc_3.15      | 1.826920e-06             | 4.166670e-08                    | 4.166670e-07            |     | -2.884610e-08                     | -2.243590e-08       |      | 0.000000e+00  |
| sol.awc_3.16      | 4.102560e-06             | 9.487180e-07                    | 1.987180e-06            |     | 3.525640e-08                      | -1.192310e-07       |      | -7.419870e-05 |
| sol.awc_3.17      | 2.986220e-04             | 2.055770e-05                    | 2.799680e-04            |     | 1.216990e-05                      | -1.461220e-05       |      | -8.159940e-04 |
| sol.awc_3.18      | 3.102310e-03             | 1.068650e-04                    | 2.657150e-03            |     | 7.436540e-05                      | 7.207730e-05        |      | -1.784390e-02 |
| sol.awc_3.19      | 8.603210e-04             | 9.185260e-05                    | 7.386220e-04            |     | 5.337820e-05                      | -1.686470e-05       |      | -3.173940e-03 |
| sol.awc_3.20      | 1.847370e-03             | -1.579490e-05                   | 1.716280e-03            |     | -1.598720e-05                     | 2.460430e-04        |      | 3.002150e-03  |
| sol.awc_3.21      | 7.849680e-04             | 6.004810e-05                    | 8.668910e-04            |     | 4.027560e-05                      | -3.685290e-05       |      | -8.279740e-03 |
| sol.awc_3.22      | 1.283300e-03             | 3.958330e-06                    | 1.174390e-03            |     | -4.566030e-05                     | 1.169670e-04        |      | -8.017180e-03 |
| sol.awc_3.23      | 5.576920e-06             | 3.423080e-06                    | 2.820510e-05            |     | 2.746790e-06                      | -1.472760e-06       |      | -8.224360e-05 |
| sol.awc_3.24      | 1.125000e-05             | -5.705130e-07                   | 4.262820e-05            |     | 5.602560e-06                      | -2.785580e-06       |      | 8.006410e-05  |
| sol.awc_3.25      | 1.240380e-05             | 1.022440e-05                    | 4.195510e-05            |     | 7.464740e-06                      | -3.102880e-06       |      | -1.909300e-04 |
| sol.awc_3.26      | 0.000000e+00             | 0.000000e+00                    | 2.243590e-07            |     | 4.166670e-08                      | 1.282040e-08        |      | 0.000000e+00  |

Continued on next page



| control file name | pretreat ET-precip ratio | pretreat discharge-precip ratio | post-treat precip ratio | ET- | post-treat discharge-precip ratio | post-treat ET ratio | diff | NSE           |
|-------------------|--------------------------|---------------------------------|-------------------------|-----|-----------------------------------|---------------------|------|---------------|
| sol.awc_3.27      | 6.634610e-06             | 5.070510e-06                    | 3.205130e-05            |     | 8.900640e-06                      | 4.284620e-06        |      | -3.378200e-05 |
| sol.awc_3.28      | 3.974360e-06             | 1.291670e-06                    | 1.435900e-05            |     | 5.551280e-06                      | 9.464740e-07        |      | 7.759620e-05  |
| sol.awc_3.29      | 2.948720e-06             | -1.602560e-07                   | 1.666670e-06            |     | -1.282050e-07                     | -1.653210e-06       |      | 0.000000e+00  |
| sol.awc_3.30      | 1.923080e-06             | -2.243590e-07                   | 5.448720e-06            |     | -1.666670e-07                     | -4.325960e-06       |      | 0.000000e+00  |
| sol.awc_3.31      | 1.163460e-05             | -7.532050e-07                   | 8.910260e-06            |     | -8.173080e-07                     | -9.435910e-07       |      | 7.371800e-06  |
| sol.awc_3.32      | 2.579170e-03             | 2.176410e-04                    | 2.695220e-03            |     | 6.301280e-05                      | 8.016700e-05        |      | -5.371540e-02 |
| sol.awc_3.33      | 1.356470e-03             | 8.695830e-05                    | 1.648690e-03            |     | -1.521800e-05                     | 6.104150e-06        |      | -2.375390e-02 |
| sol.awc_3.34      | 2.309740e-03             | 2.002660e-04                    | 2.655420e-03            |     | -2.218270e-05                     | -9.453720e-05       |      | -4.827260e-02 |
| sol.awc_3.35      | 1.445510e-05             | 2.211540e-06                    | 1.259620e-05            |     | 1.576920e-06                      | -5.740380e-07       |      | -5.269230e-05 |
| sol.awc_3.36      | 4.230770e-06             | 2.291670e-06                    | 6.089740e-06            |     | 4.230770e-07                      | -3.239100e-06       |      | -1.488140e-04 |
| sol.awc_3.37      | 1.250000e-06             | -1.057690e-07                   | 1.314100e-06            |     | 4.967950e-07                      | 1.905450e-06        |      | 1.025510e-14  |
| sol.awc_3.38      | 1.129650e-03             | 1.872600e-04                    | 1.066190e-03            |     | 5.797760e-05                      | 2.331220e-05        |      | -6.878080e-03 |
| sol.awc_3.39      | 3.089740e-04             | 2.997760e-05                    | 2.508330e-04            |     | 1.388140e-05                      | -4.964420e-06       |      | -1.269170e-03 |
| sol.awc_3.40      | 1.646790e-04             | 1.968270e-05                    | 1.354170e-04            |     | 1.092950e-05                      | 1.518970e-05        |      | -3.711540e-04 |
| sol.awc_3.41      | 3.076920e-06             | 1.086540e-06                    | 7.660260e-06            |     | -1.705130e-06                     | -1.987180e-06       |      | -1.046470e-04 |
| sol.awc_3.42      | 8.044870e-06             | 9.455130e-07                    | 1.974360e-05            |     | -1.173080e-06                     | -7.720510e-06       |      | 1.125320e-04  |
| sol.awc_3.43      | 9.775640e-06             | 1.833330e-06                    | 1.740380e-05            |     | 1.596150e-06                      | 2.147480e-08        |      | -5.868590e-05 |
| sol.awc_3.44      | 2.147440e-06             | 1.227560e-06                    | 3.076920e-06            |     | -6.602560e-07                     | 1.092630e-06        |      | 4.455130e-06  |
| sol.awc_3.45      | 2.660260e-06             | -5.641030e-07                   | 8.076920e-06            |     | -1.987180e-07                     | -1.153530e-06       |      | 8.762820e-05  |
| sol.awc_3.46      | 3.964740e-05             | 3.554490e-06                    | 3.560900e-05            |     | 1.333330e-06                      | 1.708370e-05        |      | -1.557690e-05 |
| sol.awc_3.47      | 1.639740e-04             | -1.086540e-06                   | 2.241350e-04            |     | 6.993590e-06                      | -2.961560e-07       |      | 2.105220e-03  |
| sol.awc_3.r       | 7.067020e-03             | 3.349710e-04                    | 6.982750e-03            |     | 5.550260e-05                      | 2.359130e-05        |      | -6.303080e-02 |

Continued on next page

| control file name | pretreat ET-precip ratio | pretreat discharge-precip ratio | post-treat precip ratio | ET- | post-treat discharge-precip ratio | post-treat ET diff | NSE           |
|-------------------|--------------------------|---------------------------------|-------------------------|-----|-----------------------------------|--------------------|---------------|
| sol.k_1.01        | 1.923070e-06             | -7.968270e-05                   | 6.570510e-06            |     | -3.901920e-05                     | 1.330110e-07       | 1.512820e-02  |
| sol.k_1.02        | -5.131410e-05            | -2.372430e-05                   | -3.679490e-05           |     | 4.612180e-06                      | -1.589430e-06      | 1.480570e-02  |
| sol.k_1.03        | -5.151280e-04            | 8.065290e-04                    | -6.027240e-04           |     | 6.794970e-04                      | 4.174940e-05       | 1.957640e-02  |
| sol.k_1.04        | 3.814100e-06             | -8.961540e-06                   | 4.102560e-06            |     | -1.007370e-05                     | -5.324040e-06      | 4.776310e-03  |
| sol.k_1.05        | 1.079170e-04             | -9.636790e-04                   | 2.050320e-04            |     | -7.647630e-04                     | -4.739680e-05      | 9.418360e-02  |
| sol.k_1.06        | 2.008970e-04             | -1.290690e-03                   | 3.771470e-04            |     | -1.046890e-03                     | -4.032530e-05      | 1.082120e-01  |
| sol.k_1.07        | 2.838780e-04             | -1.836160e-03                   | 5.213460e-04            |     | -1.374490e-03                     | -5.633430e-05      | 1.774320e-01  |
| sol.k_1.08        | 8.557690e-06             | -2.225960e-05                   | 6.025640e-06            |     | -1.792310e-05                     | -8.691670e-06      | 2.695960e-03  |
| sol.k_1.09        | 1.282050e-05             | -4.047440e-05                   | 2.022440e-05            |     | -4.379170e-05                     | -4.153850e-06      | 1.455810e-03  |
| sol.k_1.10        | 6.185900e-06             | -7.211540e-06                   | 6.282050e-06            |     | -1.005130e-05                     | -1.242630e-06      | 4.172080e-04  |
| sol.k_1.11        | -7.214740e-05            | 8.017630e-05                    | -6.705130e-05           |     | 6.169870e-05                      | -9.126600e-06      | 3.751820e-03  |
| sol.k_1.12        | -1.403850e-04            | 1.967880e-04                    | -1.467950e-04           |     | 2.086790e-04                      | 1.417820e-05       | 2.873730e-02  |
| sol.k_1.13        | -2.440380e-04            | 4.191570e-04                    | -2.401920e-04           |     | 4.140960e-04                      | -1.356760e-05      | -2.575310e-03 |
| sol.k_1.14        | -1.403850e-05            | -4.005770e-05                   | -1.275640e-05           |     | -6.262830e-06                     | 5.623400e-06       | 9.295090e-03  |
| sol.k_1.15        | -2.435900e-06            | 2.326920e-06                    | -6.987180e-06           |     | 8.307690e-06                      | 1.903840e-06       | 4.896510e-04  |
| sol.k_1.16        | -3.137820e-05            | 4.359290e-05                    | -4.115380e-05           |     | 3.819230e-05                      | 7.011220e-06       | 6.181670e-04  |
| sol.k_1.17        | -6.185900e-05            | -4.260580e-05                   | -6.586540e-05           |     | 1.413450e-06                      | 2.399710e-05       | 2.203750e-02  |
| sol.k_1.18        | -2.282600e-03            | 3.473260e-03                    | -2.766920e-03           |     | 2.665960e-03                      | 4.993690e-05       | 8.149280e-02  |
| sol.k_1.19        | -1.721470e-04            | 2.497760e-05                    | -1.788460e-04           |     | 1.026350e-04                      | 1.483370e-05       | 5.681760e-02  |
| sol.k_1.20        | 9.118910e-04             | -5.470940e-03                   | 2.250670e-03            |     | -4.858740e-03                     | -9.633640e-04      | 4.783160e-01  |
| sol.k_1.21        | -1.228200e-04            | -1.223610e-03                   | -9.060890e-05           |     | -7.296220e-04                     | -4.025190e-05      | 1.764200e-01  |
| sol.k_1.22        | 4.865710e-04             | -3.320690e-03                   | 1.381800e-03            |     | -2.752130e-03                     | -6.716620e-04      | 3.575050e-01  |

Continued on next page

| control file name | pretreat ET-precip ratio | pretreat discharge-precip ratio | post-treat precip ratio | ET- | post-treat discharge-precip ratio | post-treat ET diff | NSE           |
|-------------------|--------------------------|---------------------------------|-------------------------|-----|-----------------------------------|--------------------|---------------|
| sol.k_1.23        | 1.016990e-04             | -3.315960e-04                   | 1.026920e-04            |     | -2.748490e-04                     | 2.476280e-06       | 2.642990e-02  |
| sol.k_1.24        | 1.694230e-04             | -5.467150e-04                   | 1.700000e-04            |     | -4.210350e-04                     | -2.788040e-05      | 6.407850e-02  |
| sol.k_1.25        | 2.282050e-05             | -3.461700e-04                   | 2.637820e-05            |     | -2.536090e-04                     | -3.787950e-05      | 5.104370e-02  |
| sol.k_1.26        | -1.602560e-07            | -3.878200e-07                   | 9.615390e-07            |     | -2.217950e-06                     | -9.663460e-07      | -6.089750e-07 |
| sol.k_1.27        | 5.304490e-05             | -3.822050e-04                   | 7.685900e-05            |     | -2.643750e-04                     | 8.673720e-06       | 4.949040e-02  |
| sol.k_1.28        | 2.304490e-05             | -1.670510e-04                   | 4.108970e-05            |     | -1.124650e-04                     | -5.434940e-06      | 2.398460e-02  |
| sol.k_1.29        | 0.000000e+00             | -2.000000e-06                   | -1.282050e-07           |     | -1.384620e-06                     | 1.762820e-07       | 1.498720e-04  |
| sol.k_1.30        | 0.000000e+00             | 3.878210e-06                    | -1.602560e-07           |     | -2.541670e-06                     | -6.217950e-07      | 8.418590e-05  |
| sol.k_1.31        | -7.852570e-06            | 4.913460e-06                    | -7.275640e-06           |     | 8.163460e-06                      | 4.535260e-07       | 4.185770e-04  |
| sol.k_1.32        | -5.044230e-04            | 6.274780e-04                    | -5.374680e-04           |     | 4.482370e-04                      | -1.055800e-04      | 1.488230e-01  |
| sol.k_1.33        | -2.700640e-04            | 5.203620e-04                    | -3.687820e-04           |     | 5.277180e-04                      | 1.334230e-05       | 7.350990e-02  |
| sol.k_1.34        | -1.178430e-03            | 3.013280e-03                    | -1.508370e-03           |     | 2.679330e-03                      | 3.848520e-05       | -1.588640e-02 |
| sol.k_1.35        | -3.701930e-05            | -1.368270e-04                   | -3.461560e-06           |     | -9.166660e-05                     | -3.005870e-05      | 3.072680e-02  |
| sol.k_1.36        | -1.003200e-05            | -9.405450e-05                   | 1.128210e-05            |     | -6.511220e-05                     | -8.535260e-07      | 1.277650e-02  |
| sol.k_1.37        | -1.839740e-05            | 1.036860e-05                    | -1.942310e-05           |     | 1.056730e-05                      | 1.183010e-06       | 1.172850e-03  |
| sol.k_1.38        | -1.035510e-03            | 1.189510e-03                    | -1.191090e-03           |     | 1.036830e-03                      | 7.215060e-05       | 4.342270e-02  |
| sol.k_1.39        | -6.753200e-05            | -4.651930e-05                   | -2.708330e-05           |     | -4.490710e-05                     | -3.433780e-05      | 1.851440e-02  |
| sol.k_1.40        | -9.903850e-06            | -7.920830e-05                   | -1.205130e-05           |     | -4.866670e-05                     | 6.353850e-06       | 1.466030e-02  |
| sol.k_1.41        | 3.980770e-05             | -8.558330e-05                   | 3.525640e-05            |     | -6.933010e-05                     | -3.845830e-06      | 8.127470e-03  |
| sol.k_1.42        | 1.151600e-04             | -2.133690e-04                   | 1.136540e-04            |     | -2.135670e-04                     | -2.592690e-05      | 1.184030e-02  |
| sol.k_1.43        | 1.178210e-04             | -2.473080e-04                   | 1.234620e-04            |     | -2.422760e-04                     | -8.597110e-06      | 1.068390e-02  |
| sol.k_1.44        | 2.294870e-05             | -4.589420e-05                   | 2.541670e-05            |     | -3.595510e-05                     | -1.217880e-05      | 3.474820e-03  |

Continued on next page

| control file name | pretreat ET-precip ratio | pretreat discharge-precip ratio | post-treat precip ratio | ET- | post-treat discharge-precip ratio | post-treat ET ratio | diff | NSE           |
|-------------------|--------------------------|---------------------------------|-------------------------|-----|-----------------------------------|---------------------|------|---------------|
| sol.k_1.45        | 4.102560e-05             | -8.817310e-05                   | 5.134620e-05            |     | -8.024680e-05                     | 1.167630e-06        |      | 6.092650e-03  |
| sol.k_1.46        | -1.051280e-05            | 9.839740e-06                    | -1.182690e-05           |     | 1.250000e-05                      | 3.335260e-06        |      | 4.464870e-04  |
| sol.k_1.47        | -3.625000e-05            | -5.131410e-06                   | -5.862180e-05           |     | 6.256410e-06                      | 3.038110e-05        |      | 7.124710e-03  |
| sol.k_1.r         | -2.021840e-03            | -4.132470e-04                   | -1.832660e-03           |     | 6.858650e-06                      | -3.766550e-04       |      | 6.767080e-01  |
| sol.k_2.01        | 0.000000e+00             | 1.438460e-05                    | 0.000000e+00            |     | 7.554490e-06                      | 0.000000e+00        |      | -3.304810e-04 |
| sol.k_2.02        | -3.237180e-06            | 7.101600e-05                    | -1.282050e-06           |     | 5.062180e-05                      | 1.410260e-07        |      | -4.840190e-03 |
| sol.k_2.03        | -3.384620e-05            | 5.812530e-04                    | -2.910260e-05           |     | 4.208170e-04                      | 4.255450e-06        |      | -2.976050e-02 |
| sol.k_2.04        | 0.000000e+00             | 2.564100e-06                    | -6.410260e-08           |     | 3.480770e-06                      | 8.653850e-08        |      | -3.134620e-05 |
| sol.k_2.05        | 0.000000e+00             | 1.020000e-04                    | -6.410260e-07           |     | 6.773080e-05                      | -1.695510e-06       |      | -6.819550e-04 |
| sol.k_2.06        | 0.000000e+00             | 2.431090e-05                    | 0.000000e+00            |     | 1.718910e-05                      | 0.000000e+00        |      | -1.001280e-04 |
| sol.k_2.07        | 0.000000e+00             | 8.023400e-05                    | 0.000000e+00            |     | 4.871150e-05                      | -8.333330e-08       |      | -2.759940e-04 |
| sol.k_2.08        | 0.000000e+00             | -7.628200e-07                   | 0.000000e+00            |     | 6.410260e-08                      | 0.000000e+00        |      | -1.384620e-05 |
| sol.k_2.09        | 0.000000e+00             | 2.131410e-06                    | 0.000000e+00            |     | 6.891020e-07                      | 9.615380e-09        |      | -2.253200e-05 |
| sol.k_2.10        | 0.000000e+00             | 3.493590e-07                    | 0.000000e+00            |     | 1.314100e-07                      | 0.000000e+00        |      | 0.000000e+00  |
| sol.k_2.11        | -1.602560e-06            | 4.035260e-05                    | -7.051280e-07           |     | 4.064740e-05                      | -7.371800e-07       |      | -8.030450e-04 |
| sol.k_2.12        | -4.903850e-06            | 1.743140e-04                    | -2.692310e-06           |     | 1.507050e-04                      | -1.586540e-06       |      | -7.134100e-03 |
| sol.k_2.13        | -9.615380e-06            | 3.359740e-04                    | -8.974360e-07           |     | 2.605220e-04                      | -6.144230e-06       |      | -1.418220e-02 |
| sol.k_2.14        | 0.000000e+00             | 2.982690e-05                    | 0.000000e+00            |     | 1.861540e-05                      | 0.000000e+00        |      | -3.049040e-04 |
| sol.k_2.15        | 0.000000e+00             | 3.342950e-06                    | 0.000000e+00            |     | 3.836540e-06                      | 0.000000e+00        |      | -5.608980e-06 |
| sol.k_2.16        | 0.000000e+00             | 2.822760e-05                    | 0.000000e+00            |     | 2.423080e-05                      | 0.000000e+00        |      | -4.777240e-04 |
| sol.k_2.17        | -3.269230e-06            | 4.214740e-05                    | -2.243590e-06           |     | 3.822760e-05                      | 2.525640e-06        |      | -1.442180e-03 |
| sol.k_2.18        | -1.152880e-04            | 1.921670e-03                    | -1.097760e-04           |     | 1.133490e-03                      | 2.728720e-05        |      | -8.547410e-02 |

Continued on next page

| control file name | pretreat ET-precip ratio | pretreat discharge-precip ratio | post-treat precip ratio | ET- | post-treat discharge-precip ratio | post-treat ET ratio | diff | NSE           |
|-------------------|--------------------------|---------------------------------|-------------------------|-----|-----------------------------------|---------------------|------|---------------|
| sol.k_2.19        | -7.884620e-06            | 2.004230e-04                    | -4.134620e-06           |     | 1.558460e-04                      | -4.560900e-06       |      | -7.154170e-03 |
| sol.k_2.20        | -1.378210e-06            | 6.673720e-05                    | -6.730770e-07           |     | 4.050320e-05                      | 6.410260e-09        |      | -5.049040e-04 |
| sol.k_2.21        | -1.538460e-06            | 3.317080e-04                    | 0.000000e+00            |     | 1.988620e-04                      | -2.458330e-06       |      | -3.590800e-03 |
| sol.k_2.22        | 0.000000e+00             | 1.279900e-04                    | -1.442310e-06           |     | 7.360900e-05                      | -6.794870e-07       |      | -9.815380e-04 |
| sol.k_2.23        | 0.000000e+00             | -1.384610e-06                   | 9.615380e-08            |     | 7.179490e-07                      | -6.410260e-08       |      | 1.461860e-04  |
| sol.k_2.24        | 0.000000e+00             | 2.987180e-06                    | 0.000000e+00            |     | 4.221150e-06                      | 0.000000e+00        |      | 5.900640e-05  |
| sol.k_2.25        | 0.000000e+00             | 3.173080e-06                    | 0.000000e+00            |     | 5.993590e-06                      | 0.000000e+00        |      | 2.803530e-04  |
| sol.k_2.26        | 0.000000e+00             | 1.282050e-08                    | 0.000000e+00            |     | 3.205130e-09                      | 0.000000e+00        |      | -3.205130e-08 |
| sol.k_2.27        | 0.000000e+00             | 9.256410e-06                    | 0.000000e+00            |     | 6.810900e-06                      | -8.333340e-08       |      | 4.455130e-05  |
| sol.k_2.28        | 0.000000e+00             | 4.038460e-06                    | 0.000000e+00            |     | 2.416670e-06                      | 6.410260e-09        |      | -7.948720e-06 |
| sol.k_2.29        | 0.000000e+00             | 6.089740e-08                    | 0.000000e+00            |     | 9.615390e-09                      | 0.000000e+00        |      | -3.205130e-08 |
| sol.k_2.30        | 0.000000e+00             | 3.108970e-07                    | 0.000000e+00            |     | 6.987180e-07                      | 0.000000e+00        |      | -9.615380e-08 |
| sol.k_2.31        | 0.000000e+00             | 6.105770e-06                    | 0.000000e+00            |     | 4.028850e-06                      | 0.000000e+00        |      | -1.641030e-05 |
| sol.k_2.32        | -4.903850e-06            | 1.066900e-03                    | -1.336540e-05           |     | 8.790420e-04                      | -5.955130e-06       |      | -5.618110e-02 |
| sol.k_2.33        | -1.615380e-05            | 5.316470e-04                    | -1.173080e-05           |     | 4.207880e-04                      | -8.698720e-06       |      | -2.164460e-02 |
| sol.k_2.34        | -3.983970e-05            | 1.675900e-03                    | -3.785260e-05           |     | 1.333530e-03                      | -7.918590e-06       |      | -1.162720e-01 |
| sol.k_2.35        | 1.602560e-07             | 6.396150e-05                    | 0.000000e+00            |     | 3.963780e-05                      | 6.410260e-09        |      | -5.024040e-03 |
| sol.k_2.36        | 0.000000e+00             | 2.042310e-05                    | 0.000000e+00            |     | 1.191670e-05                      | 0.000000e+00        |      | -5.132690e-04 |
| sol.k_2.37        | 0.000000e+00             | 1.896150e-05                    | 6.410260e-08            |     | 7.798080e-06                      | -8.333330e-08       |      | -5.637820e-04 |
| sol.k_2.38        | -6.153850e-05            | 6.639420e-04                    | -4.490380e-05           |     | 4.588300e-04                      | 1.969130e-05        |      | -3.178890e-02 |
| sol.k_2.39        | -9.647440e-06            | 5.460260e-05                    | -2.564100e-07           |     | 5.066990e-05                      | -2.448720e-06       |      | -1.145510e-03 |
| sol.k_2.40        | -3.076920e-06            | 1.967950e-05                    | 1.282050e-06            |     | 1.745510e-05                      | -2.586540e-06       |      | -4.815070e-04 |

Continued on next page

| control file name | pretreat ET-precip ratio | pretreat discharge-precip ratio | post-treat precip ratio | ET- | post-treat discharge-precip ratio | post-treat ET ratio | diff | NSE           |
|-------------------|--------------------------|---------------------------------|-------------------------|-----|-----------------------------------|---------------------|------|---------------|
| sol.k_2.41        | 0.000000e+00             | -1.346150e-07                   | 0.000000e+00            |     | 6.794870e-07                      | 0.000000e+00        |      | -2.669870e-05 |
| sol.k_2.42        | 1.602560e-07             | 5.352560e-07                    | 6.410260e-08            |     | 6.217950e-07                      | -1.698720e-07       |      | 4.166660e-07  |
| sol.k_2.43        | -1.282050e-07            | -8.044870e-07                   | -7.371790e-07           |     | 3.397440e-07                      | 8.942310e-07        |      | -2.730770e-05 |
| sol.k_2.44        | 0.000000e+00             | 1.794870e-07                    | 0.000000e+00            |     | 2.596150e-07                      | 0.000000e+00        |      | 1.666670e-06  |
| sol.k_2.45        | -1.282050e-07            | 1.089740e-07                    | 0.000000e+00            |     | 2.179490e-07                      | 0.000000e+00        |      | -3.621790e-06 |
| sol.k_2.46        | -1.570510e-06            | 9.676280e-06                    | 0.000000e+00            |     | 9.596150e-06                      | -8.141030e-07       |      | -1.995510e-04 |
| sol.k_2.47        | 0.000000e+00             | 4.761220e-05                    | -6.730770e-07           |     | 4.094230e-05                      | -1.733970e-06       |      | -1.119650e-03 |
| sol.k_2.r         | -9.874760e-05            | 2.596400e-03                    | -9.561780e-05           |     | 1.718370e-03                      | 1.452010e-05        |      | -9.727110e-02 |
| sol.k_3.01        | 0.000000e+00             | 5.971150e-06                    | 0.000000e+00            |     | 4.355770e-06                      | 0.000000e+00        |      | -1.000320e-04 |
| sol.k_3.02        | -2.916670e-06            | 7.653850e-06                    | -1.410260e-06           |     | 9.118590e-06                      | -1.730770e-07       |      | -1.215710e-04 |
| sol.k_3.03        | -1.602560e-06            | 6.577250e-05                    | -2.339740e-06           |     | 8.914420e-05                      | -1.608980e-06       |      | -1.046310e-02 |
| sol.k_3.04        | 0.000000e+00             | 1.189100e-06                    | -6.410260e-08           |     | 3.301280e-07                      | 8.653850e-08        |      | -6.038460e-05 |
| sol.k_3.05        | 0.000000e+00             | 2.360960e-04                    | 0.000000e+00            |     | 2.070610e-04                      | 0.000000e+00        |      | -9.794900e-03 |
| sol.k_3.06        | 0.000000e+00             | 8.355770e-05                    | 0.000000e+00            |     | 4.769870e-05                      | 0.000000e+00        |      | -8.418750e-03 |
| sol.k_3.07        | 0.000000e+00             | 1.298750e-04                    | 0.000000e+00            |     | 9.127570e-05                      | 0.000000e+00        |      | -5.171030e-03 |
| sol.k_3.08        | 0.000000e+00             | -5.448710e-08                   | 0.000000e+00            |     | 9.935900e-07                      | 0.000000e+00        |      | -1.314100e-06 |
| sol.k_3.09        | 0.000000e+00             | 1.528850e-06                    | 0.000000e+00            |     | 1.580130e-06                      | 0.000000e+00        |      | 2.669870e-05  |
| sol.k_3.10        | 0.000000e+00             | 1.923080e-07                    | 0.000000e+00            |     | 1.666670e-07                      | 0.000000e+00        |      | -7.051280e-07 |
| sol.k_3.11        | 0.000000e+00             | 1.836860e-05                    | 0.000000e+00            |     | 1.968270e-05                      | 0.000000e+00        |      | -3.595830e-04 |
| sol.k_3.12        | 0.000000e+00             | 3.669230e-05                    | -7.371800e-07           |     | 3.113140e-05                      | 2.884640e-08        |      | -7.193910e-04 |
| sol.k_3.13        | 0.000000e+00             | 4.758330e-05                    | 0.000000e+00            |     | 5.169870e-05                      | 0.000000e+00        |      | -1.330550e-03 |
| sol.k_3.14        | 0.000000e+00             | 2.750000e-06                    | 0.000000e+00            |     | 4.144230e-06                      | 0.000000e+00        |      | -3.141020e-06 |

Continued on next page

| control file name | pretreat ET-precip ratio | pretreat discharge-precip ratio | post-treat precip ratio | ET- | post-treat discharge-precip ratio | post-treat ET ratio | diff | NSE           |
|-------------------|--------------------------|---------------------------------|-------------------------|-----|-----------------------------------|---------------------|------|---------------|
| sol.k_3.15        | 0.000000e+00             | 9.679490e-07                    | 0.000000e+00            |     | 6.730770e-07                      | 0.000000e+00        |      | -2.884630e-07 |
| sol.k_3.16        | 0.000000e+00             | 7.092950e-06                    | 0.000000e+00            |     | 9.330130e-06                      | 0.000000e+00        |      | 1.094550e-04  |
| sol.k_3.17        | -1.602560e-07            | -5.128180e-07                   | -9.935900e-07           |     | 1.007690e-05                      | -1.301280e-06       |      | 4.169870e-05  |
| sol.k_3.18        | -6.666670e-06            | 2.938080e-04                    | -9.006410e-06           |     | 2.029940e-04                      | 9.038460e-07        |      | -2.514170e-02 |
| sol.k_3.19        | -4.679490e-06            | 1.841670e-05                    | -2.179490e-06           |     | 3.441990e-05                      | -1.589740e-06       |      | -2.494010e-03 |
| sol.k_3.20        | 0.000000e+00             | 1.379420e-04                    | 0.000000e+00            |     | 9.580450e-05                      | 0.000000e+00        |      | -1.383490e-03 |
| sol.k_3.21        | 0.000000e+00             | 4.373010e-04                    | 0.000000e+00            |     | 3.399040e-04                      | 0.000000e+00        |      | -1.884310e-02 |
| sol.k_3.22        | 0.000000e+00             | 3.272370e-04                    | 0.000000e+00            |     | 2.173690e-04                      | 0.000000e+00        |      | -1.051730e-02 |
| sol.k_3.23        | 0.000000e+00             | 7.833330e-06                    | 0.000000e+00            |     | 6.016030e-06                      | 0.000000e+00        |      | -2.971150e-04 |
| sol.k_3.24        | 0.000000e+00             | 2.235260e-05                    | 0.000000e+00            |     | 1.622760e-05                      | 0.000000e+00        |      | -3.970510e-04 |
| sol.k_3.25        | 0.000000e+00             | 6.269230e-05                    | 0.000000e+00            |     | 4.624360e-05                      | 0.000000e+00        |      | -4.569870e-04 |
| sol.k_3.26        | 0.000000e+00             | 3.108970e-07                    | 0.000000e+00            |     | 9.449910e-15                      | 0.000000e+00        |      | 8.012820e-07  |
| sol.k_3.27        | 0.000000e+00             | 2.592310e-05                    | 0.000000e+00            |     | 2.296470e-05                      | 0.000000e+00        |      | -4.785260e-04 |
| sol.k_3.28        | 0.000000e+00             | 7.314100e-06                    | 0.000000e+00            |     | 4.435900e-06                      | 0.000000e+00        |      | -1.075960e-04 |
| sol.k_3.29        | 0.000000e+00             | 9.967950e-07                    | 0.000000e+00            |     | 3.205130e-08                      | 0.000000e+00        |      | -9.407050e-05 |
| sol.k_3.30        | 0.000000e+00             | 1.141030e-06                    | 0.000000e+00            |     | 3.044870e-07                      | 0.000000e+00        |      | -9.355770e-05 |
| sol.k_3.31        | 0.000000e+00             | 1.017950e-05                    | 0.000000e+00            |     | 7.176280e-06                      | 0.000000e+00        |      | -3.814100e-04 |
| sol.k_3.32        | -1.634620e-06            | 2.354550e-04                    | -1.474360e-06           |     | 1.730160e-04                      | 1.685900e-06        |      | -1.863960e-02 |
| sol.k_3.33        | -1.730770e-06            | 5.358970e-05                    | 0.000000e+00            |     | 5.519230e-05                      | 0.000000e+00        |      | 3.380610e-03  |
| sol.k_3.34        | 0.000000e+00             | 4.005550e-04                    | 0.000000e+00            |     | 3.969010e-04                      | 0.000000e+00        |      | -2.244510e-02 |
| sol.k_3.35        | 0.000000e+00             | 2.463140e-05                    | 0.000000e+00            |     | 1.255450e-05                      | 0.000000e+00        |      | -3.051150e-03 |
| sol.k_3.36        | 0.000000e+00             | 4.073720e-06                    | 0.000000e+00            |     | 4.528850e-06                      | 0.000000e+00        |      | -2.782050e-05 |

Continued on next page

| control file name | pretreat ET-precip ratio | pretreat discharge-precip ratio | post-treat precip ratio | ET- | post-treat discharge-precip ratio | post-treat ET ratio | diff | NSE           |
|-------------------|--------------------------|---------------------------------|-------------------------|-----|-----------------------------------|---------------------|------|---------------|
| sol_k_3.37        | 0.000000e+00             | 4.618590e-06                    | 0.000000e+00            |     | 2.282050e-06                      | 0.000000e+00        |      | -2.759610e-05 |
| sol_k_3.38        | -6.025640e-06            | 7.233010e-05                    | -5.128200e-06           |     | 1.089870e-04                      | -5.769280e-08       |      | -4.192850e-03 |
| sol_k_3.39        | -1.602560e-06            | 1.138780e-05                    | -7.692310e-07           |     | 1.402880e-05                      | -8.365380e-07       |      | -3.124710e-03 |
| sol_k_3.40        | 0.000000e+00             | -6.532050e-06                   | -8.012820e-07           |     | 4.442310e-06                      | 1.314100e-07        |      | 2.644550e-04  |
| sol_k_3.41        | 0.000000e+00             | 2.615380e-06                    | 0.000000e+00            |     | 3.086540e-06                      | 0.000000e+00        |      | -8.108970e-05 |
| sol_k_3.42        | 0.000000e+00             | 3.891030e-06                    | 0.000000e+00            |     | 4.820510e-06                      | 0.000000e+00        |      | -6.730730e-07 |
| sol_k_3.43        | 0.000000e+00             | 2.801280e-06                    | 0.000000e+00            |     | 4.105770e-06                      | 0.000000e+00        |      | 3.846180e-07  |
| sol_k_3.44        | 0.000000e+00             | 8.878200e-07                    | 0.000000e+00            |     | 9.198720e-07                      | 0.000000e+00        |      | -5.160260e-06 |
| sol_k_3.45        | 0.000000e+00             | 1.846150e-06                    | 0.000000e+00            |     | 1.983970e-06                      | 0.000000e+00        |      | -2.211540e-06 |
| sol_k_3.46        | 0.000000e+00             | 1.637820e-06                    | 0.000000e+00            |     | 1.173080e-06                      | 0.000000e+00        |      | -4.391020e-06 |
| sol_k_3.47        | 0.000000e+00             | 2.916350e-05                    | 0.000000e+00            |     | 2.295830e-05                      | 0.000000e+00        |      | -4.127210e-03 |
| sol_k_3.r         | -1.065870e-05            | 8.269730e-04                    | -1.109860e-05           |     | 6.704630e-04                      | 4.362120e-06        |      | -3.395420e-02 |
| sol_thk_1.01      | 2.579490e-04             | 1.588460e-05                    | 2.547120e-04            |     | -5.804490e-06                     | -3.226350e-05       |      | 2.852560e-03  |
| sol_thk_1.02      | 3.972440e-04             | 9.278850e-06                    | 3.730450e-04            |     | -4.999680e-05                     | -5.943280e-06       |      | -9.205130e-03 |
| sol_thk_1.03      | 1.635320e-03             | -3.713490e-04                   | 1.552050e-03            |     | -4.776570e-04                     | -3.527660e-05       |      | -3.512490e-04 |
| sol_thk_1.04      | 5.977560e-05             | 1.653850e-06                    | 4.974360e-05            |     | -1.500000e-06                     | 1.614260e-05        |      | -1.742630e-04 |
| sol_thk_1.05      | 2.625930e-03             | 1.980450e-04                    | 2.556600e-03            |     | 5.768910e-05                      | -9.372150e-05       |      | -1.730550e-02 |
| sol_thk_1.06      | 2.727660e-03             | 3.232240e-04                    | 2.767850e-03            |     | 1.538720e-04                      | -1.655990e-05       |      | -5.826300e-02 |
| sol_thk_1.07      | 3.693460e-03             | 2.015580e-04                    | 3.758620e-03            |     | 1.194460e-04                      | -1.398440e-04       |      | -1.308920e-02 |
| sol_thk_1.08      | 2.993590e-05             | 4.423080e-06                    | 4.070510e-05            |     | -1.044870e-06                     | -3.425320e-06       |      | 3.679480e-05  |
| sol_thk_1.09      | 9.131410e-05             | 8.685890e-07                    | 7.480770e-05            |     | -1.125000e-06                     | -1.216280e-05       |      | 1.950960e-04  |
| sol_thk_1.10      | 3.657050e-05             | 3.157050e-06                    | 2.971150e-05            |     | 3.685900e-07                      | -1.103460e-05       |      | 6.535260e-05  |

Continued on next page



| control file name | pretreat ET-precip ratio | pretreat discharge-precip ratio | post-treat precip ratio | ET- | post-treat discharge-precip ratio | post-treat ET ratio | diff | NSE           |
|-------------------|--------------------------|---------------------------------|-------------------------|-----|-----------------------------------|---------------------|------|---------------|
| sol.thk_1_11      | 4.750640e-04             | -3.803850e-05                   | 5.011220e-04            |     | -7.433980e-05                     | -5.500960e-05       |      | -1.428780e-03 |
| sol.thk_1_12      | 1.005220e-03             | -1.541190e-04                   | 1.180670e-03            |     | -1.295480e-04                     | -1.028210e-04       |      | 1.238480e-02  |
| sol.thk_1_13      | 7.801600e-04             | -1.546670e-04                   | 8.548720e-04            |     | -2.340610e-04                     | 3.115390e-06        |      | -6.822790e-03 |
| sol.thk_1_14      | 4.210260e-04             | 4.521800e-05                    | 4.092630e-04            |     | 7.413460e-06                      | -3.014390e-05       |      | -8.367950e-03 |
| sol.thk_1_15      | 5.884620e-05             | 5.246790e-06                    | 6.445510e-05            |     | -7.243590e-07                     | -1.314390e-05       |      | -6.174360e-04 |
| sol.thk_1_16      | 1.449360e-04             | -2.185260e-05                   | 1.562820e-04            |     | -2.522440e-05                     | 7.568910e-06        |      | -1.733970e-04 |
| sol.thk_1_17      | 5.051600e-04             | 6.509610e-06                    | 4.718270e-04            |     | -3.724040e-05                     | -3.287830e-06       |      | -7.975160e-03 |
| sol.thk_1_18      | 4.843490e-03             | -1.178580e-03                   | 4.331890e-03            |     | -1.270170e-03                     | 5.497640e-04        |      | -1.105200e-02 |
| sol.thk_1_19      | 1.462210e-03             | -1.362180e-05                   | 1.380100e-03            |     | -1.263110e-04                     | -2.460540e-05       |      | -6.905870e-03 |
| sol.thk_1_20      | 1.125420e-02             | 1.036180e-03                    | 1.082940e-02            |     | 7.536890e-04                      | 2.452270e-04        |      | -8.035410e-02 |
| sol.thk_1_21      | 4.580380e-03             | 2.945350e-04                    | 5.113810e-03            |     | -4.733970e-05                     | -1.876650e-04       |      | -7.175360e-02 |
| sol.thk_1_22      | 7.847180e-03             | 1.407530e-04                    | 7.713170e-03            |     | 2.839100e-04                      | 2.798870e-04        |      | -5.172530e-02 |
| sol.thk_1_23      | 6.723720e-04             | 1.038780e-04                    | 7.041990e-04            |     | 6.575320e-05                      | -1.333170e-05       |      | 1.368240e-03  |
| sol.thk_1_24      | 1.080640e-03             | 4.704810e-05                    | 1.140000e-03            |     | 1.269220e-06                      | 8.215700e-06        |      | 1.477570e-04  |
| sol.thk_1_25      | 9.427880e-04             | 1.159070e-04                    | 1.056830e-03            |     | 3.230770e-06                      | -7.759260e-05       |      | 2.185640e-03  |
| sol.thk_1_26      | 2.852560e-06             | 8.429490e-07                    | 1.089740e-05            |     | 8.461540e-07                      | -5.066350e-06       |      | 4.006440e-06  |
| sol.thk_1_27      | 7.679170e-04             | 7.449680e-05                    | 7.825640e-04            |     | 3.763780e-05                      | -1.465290e-05       |      | 3.246480e-04  |
| sol.thk_1_28      | 3.830770e-04             | 2.450640e-05                    | 3.318270e-04            |     | 2.342630e-05                      | 4.094010e-05        |      | 2.026540e-03  |
| sol.thk_1_29      | 6.794870e-06             | 2.307690e-07                    | 5.641030e-06            |     | -6.089730e-08                     | 1.221150e-06        |      | -2.564100e-06 |
| sol.thk_1_30      | 1.923080e-05             | -9.807690e-07                   | 1.355770e-05            |     | -4.807690e-08                     | 6.023400e-06        |      | 4.807690e-06  |
| sol.thk_1_31      | 6.137820e-05             | -7.336540e-06                   | 4.926280e-05            |     | -7.727560e-06                     | 6.320840e-06        |      | 8.256410e-05  |
| sol.thk_1_32      | 5.927560e-03             | -3.762530e-04                   | 6.551250e-03            |     | -6.914140e-04                     | 8.806920e-05        |      | -8.690520e-02 |

Continued on next page

| control file name | pretreat ET-precip ratio | pretreat discharge-precip ratio | post-treat precip ratio | ET- | post-treat discharge-precip ratio | post-treat ET ratio | diff | NSE           |
|-------------------|--------------------------|---------------------------------|-------------------------|-----|-----------------------------------|---------------------|------|---------------|
| sol.thk_1_33      | 3.169680e-03             | -2.081090e-04                   | 3.818590e-03            |     | -4.825030e-04                     | -2.476010e-04       |      | -4.209180e-02 |
| sol.thk_1_34      | 5.218210e-03             | -8.742630e-04                   | 5.881280e-03            |     | -1.466850e-03                     | -2.133200e-04       |      | -7.381810e-02 |
| sol.thk_1_35      | 8.428210e-04             | 7.578530e-05                    | 9.205130e-04            |     | -9.701910e-06                     | -8.070550e-05       |      | -5.482370e-04 |
| sol.thk_1_36      | 3.895830e-04             | 3.388780e-05                    | 4.037180e-04            |     | 1.060900e-06                      | 2.570260e-05        |      | -1.004230e-03 |
| sol.thk_1_37      | 1.200000e-04             | -1.193270e-05                   | 1.074680e-04            |     | -8.939100e-06                     | 4.757630e-05        |      | 3.041990e-04  |
| sol.thk_1_38      | 2.070290e-03             | -4.781030e-04                   | 2.184780e-03            |     | -5.868460e-04                     | -1.345500e-04       |      | 1.142400e-02  |
| sol.thk_1_39      | 5.171470e-04             | -1.645830e-05                   | 5.012820e-04            |     | -3.451920e-05                     | 9.304810e-06        |      | 4.315710e-04  |
| sol.thk_1_40      | 2.757370e-04             | 1.777560e-05                    | 2.480130e-04            |     | -6.105770e-06                     | -1.678810e-05       |      | -3.798720e-04 |
| sol.thk_1_41      | 1.203850e-04             | 1.352570e-06                    | 1.850320e-04            |     | -5.291670e-06                     | -4.677660e-05       |      | 1.955130e-04  |
| sol.thk_1_42      | 4.897120e-04             | -2.310910e-06                   | 4.385900e-04            |     | -9.647430e-06                     | 3.909900e-05        |      | 3.632920e-03  |
| sol.thk_1_43      | 5.005450e-04             | 4.088780e-05                    | 5.166350e-04            |     | 1.347110e-05                      | 4.616660e-06        |      | 2.243210e-03  |
| sol.thk_1_44      | 8.185900e-05             | -3.019230e-06                   | 7.339740e-05            |     | -2.054490e-06                     | -7.698730e-07       |      | 1.883330e-04  |
| sol.thk_1_45      | 2.122440e-04             | 1.265060e-05                    | 2.340060e-04            |     | 7.621800e-06                      | -3.652240e-05       |      | 6.775960e-04  |
| sol.thk_1_46      | 6.448720e-05             | -7.179490e-07                   | 8.983970e-05            |     | -8.442310e-06                     | -2.189360e-05       |      | -3.835900e-04 |
| sol.thk_1_47      | 4.837820e-04             | 3.181730e-05                    | 5.167310e-04            |     | -4.337180e-05                     | -2.044330e-05       |      | -5.351700e-03 |
| sol.thk_2_01      | 1.976920e-04             | 2.799680e-05                    | 1.750640e-04            |     | 9.647440e-06                      | 2.174070e-05        |      | -3.247120e-04 |
| sol.thk_2_02      | 3.115060e-04             | 2.228210e-05                    | 2.911540e-04            |     | 1.054810e-05                      | -2.122210e-05       |      | -2.232400e-03 |
| sol.thk_2_03      | 1.282720e-03             | -1.217500e-04                   | 1.012080e-03            |     | -7.786540e-05                     | -3.462850e-05       |      | 1.037030e-02  |
| sol.thk_2_04      | 5.032050e-05             | 7.016030e-06                    | 6.035260e-05            |     | 3.721150e-06                      | -2.245100e-05       |      | -3.535580e-04 |
| sol.thk_2_05      | 1.641150e-03             | 1.400160e-04                    | 1.495740e-03            |     | 9.261220e-05                      | -6.026060e-05       |      | -6.550230e-03 |
| sol.thk_2_06      | 1.634900e-03             | 7.379490e-05                    | 1.727150e-03            |     | 1.062370e-04                      | -9.415000e-05       |      | -9.161700e-03 |
| sol.thk_2_07      | 2.314520e-03             | 5.850320e-05                    | 2.202530e-03            |     | 1.022400e-04                      | -7.609420e-05       |      | 8.292020e-03  |

Continued on next page

| control file name | pretreat ET-precip ratio | pretreat discharge-precip ratio | post-treat precip ratio | ET- | post-treat discharge-precip ratio | post-treat ET ratio | diff | NSE           |
|-------------------|--------------------------|---------------------------------|-------------------------|-----|-----------------------------------|---------------------|------|---------------|
| sol.thk_2_08      | 2.897440e-05             | 5.871790e-06                    | 3.509620e-05            |     | 3.977560e-06                      | -3.345510e-06       |      | 2.766030e-05  |
| sol.thk_2_09      | 7.282050e-05             | -1.977570e-06                   | 6.455130e-05            |     | -6.762810e-07                     | 1.876730e-05        |      | 4.097120e-04  |
| sol.thk_2_10      | 5.544870e-06             | -1.000000e-06                   | 1.282050e-05            |     | 2.230770e-06                      | 8.302890e-06        |      | 1.657050e-05  |
| sol.thk_2_11      | 2.739100e-04             | 1.362500e-05                    | 3.008010e-04            |     | -9.057690e-06                     | 1.520900e-05        |      | -2.927080e-03 |
| sol.thk_2_12      | 6.411860e-04             | -3.167950e-05                   | 7.256410e-04            |     | -8.993590e-06                     | -1.402440e-05       |      | -1.691670e-04 |
| sol.thk_2_13      | 4.520830e-04             | -3.283010e-05                   | 5.100960e-04            |     | -4.435900e-05                     | -2.619780e-05       |      | -3.518910e-04 |
| sol.thk_2_14      | 2.909620e-04             | 7.439420e-05                    | 3.224360e-04            |     | 2.499360e-05                      | -4.924520e-05       |      | -1.329240e-02 |
| sol.thk_2_15      | 4.064100e-05             | 5.634610e-06                    | 3.166670e-05            |     | 5.653850e-06                      | -2.733980e-06       |      | -5.011860e-04 |
| sol.thk_2_16      | 1.148080e-04             | -8.352560e-06                   | 1.025960e-04            |     | -1.782050e-06                     | -6.088140e-06       |      | 1.397440e-05  |
| sol.thk_2_17      | 4.591030e-04             | 3.836220e-05                    | 3.991030e-04            |     | 2.010580e-05                      | -6.325860e-05       |      | -4.354360e-03 |
| sol.thk_2_18      | 4.545450e-03             | -3.647600e-04                   | 3.421790e-03            |     | -2.589620e-04                     | 1.547850e-04        |      | -9.681950e-03 |
| sol.thk_2_19      | 1.206990e-03             | 8.437180e-05                    | 9.973080e-04            |     | 1.788140e-05                      | -1.597560e-05       |      | -5.302340e-03 |
| sol.thk_2_20      | 6.699130e-03             | 5.121540e-04                    | 6.329490e-03            |     | 4.489390e-04                      | -1.510660e-04       |      | -4.439110e-02 |
| sol.thk_2_21      | 2.790290e-03             | 3.655190e-04                    | 2.894230e-03            |     | 1.188780e-04                      | -2.230130e-05       |      | -8.191530e-02 |
| sol.thk_2_22      | 4.570640e-03             | 1.001570e-04                    | 4.399810e-03            |     | 1.683240e-04                      | -5.972980e-05       |      | -2.822280e-02 |
| sol.thk_2_23      | 5.700000e-04             | 9.853530e-05                    | 5.865060e-04            |     | 8.563780e-05                      | -1.778050e-05       |      | 7.787180e-04  |
| sol.thk_2_24      | 9.082370e-04             | 8.634630e-06                    | 9.132050e-04            |     | 5.939750e-05                      | 5.966020e-06        |      | 2.248970e-03  |
| sol.thk_2_25      | 8.954170e-04             | 1.191570e-04                    | 9.844870e-04            |     | 4.473080e-05                      | -8.768750e-05       |      | 2.254650e-03  |
| sol.thk_2_26      | 1.144230e-05             | 1.474360e-07                    | 3.910260e-06            |     | -2.916670e-07                     | 4.763460e-06        |      | -2.564100e-06 |
| sol.thk_2_27      | 6.099680e-04             | 8.650960e-05                    | 6.189100e-04            |     | 5.896470e-05                      | -4.138720e-05       |      | -3.935900e-05 |
| sol.thk_2_28      | 2.858010e-04             | 3.682690e-05                    | 3.136540e-04            |     | 2.773720e-05                      | -2.631830e-05       |      | -3.954490e-04 |
| sol.thk_2_29      | 3.685900e-06             | -4.807690e-08                   | 3.173080e-06            |     | -2.147440e-07                     | 1.570520e-07        |      | 0.000000e+00  |

Continued on next page

| control file name | pretreat ET-precip ratio | pretreat discharge-precip ratio | post-treat precip ratio | ET- | post-treat discharge-precip ratio | post-treat ET ratio | diff | NSE           |
|-------------------|--------------------------|---------------------------------|-------------------------|-----|-----------------------------------|---------------------|------|---------------|
| sol.thk_2_30      | 1.387820e-05             | 5.000000e-07                    | 6.634620e-06            |     | -3.557690e-07                     | 8.868590e-06        |      | -2.464740e-05 |
| sol.thk_2_31      | 1.692310e-05             | -1.378210e-06                   | 1.900640e-05            |     | -1.990380e-06                     | 6.917950e-06        |      | 7.051280e-07  |
| sol.thk_2_32      | 3.560160e-03             | 1.974620e-04                    | 3.951440e-03            |     | 5.373720e-05                      | -6.780740e-06       |      | -6.517820e-02 |
| sol.thk_2_33      | 2.077080e-03             | -4.540380e-05                   | 2.451510e-03            |     | -1.678590e-04                     | -1.116460e-04       |      | -2.531500e-02 |
| sol.thk_2_34      | 2.997600e-03             | 3.519230e-05                    | 3.393270e-03            |     | -2.963880e-04                     | -1.220570e-04       |      | -6.072430e-02 |
| sol.thk_2_35      | 7.660580e-04             | 1.538690e-04                    | 7.111220e-04            |     | 3.246800e-05                      | -4.485580e-05       |      | -8.056860e-03 |
| sol.thk_2_36      | 3.556090e-04             | 5.100640e-05                    | 3.610580e-04            |     | 1.650640e-05                      | -4.152240e-05       |      | -1.962530e-03 |
| sol.thk_2_37      | 1.049360e-04             | -2.496790e-06                   | 1.046150e-04            |     | -4.551280e-07                     | -1.123010e-05       |      | 3.096510e-03  |
| sol.thk_2_38      | 1.832820e-03             | -2.997120e-05                   | 1.596350e-03            |     | -5.284940e-05                     | -1.533570e-04       |      | 2.648240e-03  |
| sol.thk_2_39      | 5.007370e-04             | 3.665380e-05                    | 4.317630e-04            |     | 1.389100e-05                      | -5.034330e-05       |      | 1.285030e-03  |
| sol.thk_2_40      | 2.511220e-04             | 3.070510e-05                    | 1.937500e-04            |     | 1.129490e-05                      | 1.127340e-05        |      | -6.693590e-04 |
| sol.thk_2_41      | 1.248400e-04             | 7.019230e-06                    | 1.452880e-04            |     | 3.259610e-06                      | -3.895830e-06       |      | 5.139740e-04  |
| sol.thk_2_42      | 3.457370e-04             | 3.061860e-05                    | 4.609290e-04            |     | -1.554480e-06                     | -4.651700e-05       |      | 3.494130e-03  |
| sol.thk_2_43      | 4.280770e-04             | 7.717310e-05                    | 5.283970e-04            |     | 3.543590e-05                      | -8.565000e-05       |      | 1.533910e-03  |
| sol.thk_2_44      | 6.500000e-05             | 3.714740e-06                    | 6.711540e-05            |     | 2.500000e-06                      | -1.450420e-05       |      | 2.699680e-04  |
| sol.thk_2_45      | 1.449040e-04             | 3.166670e-06                    | 1.858970e-04            |     | 1.327240e-05                      | -4.064650e-05       |      | 1.218300e-03  |
| sol.thk_2_46      | 4.826920e-05             | -3.429480e-07                   | 5.387820e-05            |     | -1.551280e-06                     | 1.650540e-05        |      | -9.884620e-05 |
| sol.thk_2_47      | 3.252880e-04             | 4.488140e-05                    | 3.355770e-04            |     | 1.570520e-07                      | -2.410770e-05       |      | -2.004810e-03 |
| sol.thk_3_01      | 6.025640e-06             | 1.240380e-06                    | 5.064100e-06            |     | 1.826920e-07                      | -1.530450e-06       |      | -1.756410e-05 |
| sol.thk_3_02      | 2.996470e-04             | 2.617950e-05                    | 2.279810e-04            |     | 4.025640e-06                      | -3.480100e-05       |      | -1.143850e-03 |
| sol.thk_3_03      | 8.017950e-04             | 7.888460e-05                    | 7.708330e-04            |     | -4.647440e-06                     | -6.157280e-05       |      | -6.449390e-03 |
| sol.thk_3_04      | 4.195510e-05             | 5.291670e-06                    | 4.416670e-05            |     | 6.923080e-07                      | -1.634810e-05       |      | -2.365700e-04 |

Continued on next page

| control file name | pretreat ET-precip ratio | pretreat discharge-precip ratio | post-treat precip ratio | ET- | post-treat discharge-precip ratio | post-treat ET ratio | diff | NSE           |
|-------------------|--------------------------|---------------------------------|-------------------------|-----|-----------------------------------|---------------------|------|---------------|
| sol.thk_3_05      | 5.121800e-04             | 5.419230e-05                    | 4.972120e-04            |     | 3.083330e-06                      | -1.574420e-05       |      | -4.577400e-03 |
| sol.thk_3_06      | 4.943910e-04             | 1.992310e-05                    | 5.305130e-04            |     | 1.359300e-05                      | -3.981150e-05       |      | -4.122690e-03 |
| sol.thk_3_07      | 7.352560e-04             | 1.956090e-05                    | 7.499360e-04            |     | -4.092950e-06                     | -6.447500e-05       |      | -1.905030e-03 |
| sol.thk_3_08      | -3.205130e-08            | 3.076920e-07                    | -2.243590e-07           |     | 9.615420e-09                      | 4.025640e-07        |      | 1.141030e-05  |
| sol.thk_3_09      | 8.653850e-07             | -7.948720e-07                   | 1.346150e-06            |     | -1.762820e-07                     | 3.865380e-07        |      | 1.110580e-04  |
| sol.thk_3_10      | 6.089740e-07             | 7.371790e-08                    | 7.692310e-07            |     | 3.205180e-09                      | -1.548080e-07       |      | -2.403850e-06 |
| sol.thk_3_11      | 1.944870e-04             | 1.885260e-05                    | 2.233010e-04            |     | -2.051280e-07                     | -1.663910e-05       |      | -3.377050e-03 |
| sol.thk_3_12      | 5.287500e-04             | 1.137180e-05                    | 5.298080e-04            |     | -2.262820e-06                     | -4.420420e-05       |      | -3.046090e-03 |
| sol.thk_3_13      | 3.222440e-04             | 1.747120e-05                    | 3.733010e-04            |     | 3.416670e-06                      | -4.192400e-05       |      | 5.363470e-04  |
| sol.thk_3_14      | 7.083330e-06             | -1.282050e-07                   | 2.852560e-06            |     | 4.455130e-07                      | 2.563780e-06        |      | 0.000000e+00  |
| sol.thk_3_15      | 3.205130e-07             | 0.000000e+00                    | 5.769230e-07            |     | 1.282050e-08                      | 8.333330e-07        |      | 0.000000e+00  |
| sol.thk_3_16      | 2.884620e-07             | -3.205130e-08                   | 1.089740e-06            |     | 2.564100e-08                      | 1.746150e-06        |      | 0.000000e+00  |
| sol.thk_3_17      | 3.200960e-04             | 6.463780e-05                    | 2.820510e-04            |     | 5.535260e-06                      | 9.559300e-06        |      | -6.513110e-03 |
| sol.thk_3_18      | 3.138110e-03             | 1.764290e-04                    | 2.461150e-03            |     | 2.812500e-05                      | 1.704190e-04        |      | -4.236210e-02 |
| sol.thk_3_19      | 9.462820e-04             | 1.201540e-04                    | 8.078530e-04            |     | 2.796160e-05                      | -3.355710e-05       |      | -4.708370e-03 |
| sol.thk_3_20      | 2.130030e-03             | 4.246150e-05                    | 2.127790e-03            |     | 1.210580e-05                      | 6.726620e-06        |      | -1.208140e-03 |
| sol.thk_3_21      | 8.408980e-04             | 7.648080e-05                    | 9.505770e-04            |     | 2.912500e-05                      | -9.521220e-05       |      | -1.211620e-02 |
| sol.thk_3_22      | 1.568620e-03             | -7.321790e-05                   | 1.544390e-03            |     | 1.099360e-06                      | -3.266660e-06       |      | 5.897620e-03  |
| sol.thk_3_23      | 2.657050e-05             | 4.474360e-06                    | 2.942310e-05            |     | 7.089740e-06                      | -4.451930e-07       |      | 1.628210e-05  |
| sol.thk_3_24      | 2.054490e-05             | 5.288460e-06                    | 4.983970e-05            |     | 3.467950e-06                      | -5.389740e-06       |      | -3.076960e-06 |
| sol.thk_3_25      | 2.349360e-05             | 6.650640e-06                    | 4.535260e-05            |     | 4.583330e-06                      | -7.087820e-06       |      | -1.323720e-04 |
| sol.thk_3_26      | 3.205130e-07             | 0.000000e+00                    | -3.205130e-08           |     | -6.410260e-08                     | 5.185900e-07        |      | 0.000000e+00  |

Continued on next page

| control file name | pretreat ET-precip ratio | pretreat discharge-precip ratio | post-treat precip ratio | ET- | post-treat discharge-precip ratio | post-treat ET ratio | diff | NSE           |
|-------------------|--------------------------|---------------------------------|-------------------------|-----|-----------------------------------|---------------------|------|---------------|
| sol.thk_3_27      | 2.259620e-05             | 1.663460e-06                    | 3.801280e-05            |     | 5.083330e-06                      | -2.340380e-06       |      | 1.244550e-04  |
| sol.thk_3_28      | 8.717950e-06             | 2.371790e-06                    | 1.855770e-05            |     | 8.814100e-07                      | -4.898400e-06       |      | -1.321150e-04 |
| sol.thk_3_29      | 4.871790e-06             | 9.326930e-06                    | 2.980770e-06            |     | 1.602560e-08                      | -2.852570e-07       |      | -3.423080e-03 |
| sol.thk_3_30      | 2.019230e-06             | -2.660260e-07                   | 4.358970e-06            |     | 2.051280e-07                      | -1.696150e-06       |      | 1.858970e-06  |
| sol.thk_3_31      | 1.137820e-05             | -3.205130e-07                   | 9.102560e-06            |     | -6.153850e-07                     | -4.124990e-07       |      | -2.051280e-06 |
| sol.thk_3_32      | 2.601410e-03             | 2.152500e-04                    | 2.817150e-03            |     | 1.051730e-04                      | -4.015320e-05       |      | -4.977920e-02 |
| sol.thk_3_33      | 1.545350e-03             | 1.346250e-04                    | 1.733080e-03            |     | -1.627240e-05                     | -1.537720e-04       |      | -3.385380e-02 |
| sol.thk_3_34      | 2.150350e-03             | 2.336760e-04                    | 2.385540e-03            |     | 1.033970e-05                      | -1.438270e-05       |      | -4.712100e-02 |
| sol.thk_3_35      | 1.301280e-05             | 3.865380e-06                    | 1.657050e-05            |     | 1.375000e-06                      | -4.781090e-06       |      | -1.026280e-04 |
| sol.thk_3_36      | 8.878200e-06             | 7.147440e-07                    | 5.673080e-06            |     | -7.852560e-07                     | 4.819870e-06        |      | -5.750000e-05 |
| sol.thk_3_37      | 7.051280e-07             | -3.974360e-07                   | 2.435900e-06            |     | 1.955130e-07                      | -9.291660e-07       |      | 2.839740e-05  |
| sol.thk_3_38      | 1.094810e-03             | 2.729290e-04                    | 9.350640e-04            |     | 5.282690e-05                      | 3.565830e-05        |      | -1.210030e-02 |
| sol.thk_3_39      | 3.274360e-04             | 7.784300e-05                    | 2.788780e-04            |     | 1.778210e-05                      | -2.010580e-06       |      | -3.203720e-03 |
| sol.thk_3_40      | 1.438460e-04             | 3.028210e-05                    | 1.498720e-04            |     | 3.198720e-06                      | 1.215380e-06        |      | -5.941030e-04 |
| sol.thk_3_41      | 7.051280e-06             | -1.826920e-06                   | 8.557690e-06            |     | 4.326920e-07                      | 8.833330e-07        |      | 1.973400e-04  |
| sol.thk_3_42      | 1.576920e-05             | 1.185890e-07                    | 3.455130e-05            |     | -1.428530e-05                     | -1.589710e-05       |      | 1.178850e-04  |
| sol.thk_3_43      | 2.012820e-05             | 5.615380e-06                    | 2.025640e-05            |     | -2.820510e-07                     | 1.355130e-06        |      | -8.403850e-05 |
| sol.thk_3_44      | 6.282050e-06             | -2.852560e-07                   | 4.455130e-06            |     | 8.557690e-07                      | -1.171470e-06       |      | 1.121790e-06  |
| sol.thk_3_45      | 1.022440e-05             | 1.977560e-06                    | 1.413460e-05            |     | -4.823720e-06                     | -4.084300e-06       |      | 2.932690e-05  |
| sol.thk_3_46      | 3.878200e-05             | 1.207050e-05                    | 3.810900e-05            |     | 1.320510e-06                      | 4.980450e-06        |      | -3.462280e-03 |
| sol.thk_3_47      | 2.161220e-04             | 4.804170e-05                    | 2.248080e-04            |     | 1.346150e-06                      | -3.856470e-05       |      | -7.267180e-03 |
| surlag_01         | 0.000000e+00             | 2.179490e-06                    | 0.000000e+00            |     | 1.676280e-06                      | 0.000000e+00        |      | -1.182690e-04 |

Continued on next page

| control file name | pretreat ET-precip ratio | pretreat discharge-precip ratio | post-treat precip ratio | ET- | post-treat discharge-precip ratio | post-treat ET ratio | diff | NSE           |
|-------------------|--------------------------|---------------------------------|-------------------------|-----|-----------------------------------|---------------------|------|---------------|
| surlag_02         | 0.000000e+00             | 2.727560e-06                    | 0.000000e+00            |     | -8.012810e-08                     | 0.000000e+00        |      | -1.278850e-05 |
| surlag_03         | 0.000000e+00             | 8.044870e-07                    | 0.000000e+00            |     | -1.612180e-06                     | 7.692310e-08        |      | -3.458330e-05 |
| surlag_04         | 0.000000e+00             | -3.205130e-08                   | 0.000000e+00            |     | 1.054490e-06                      | 0.000000e+00        |      | 0.000000e+00  |
| surlag_05         | 0.000000e+00             | 2.262820e-06                    | 0.000000e+00            |     | -1.048080e-06                     | 0.000000e+00        |      | -1.513460e-04 |
| surlag_06         | 0.000000e+00             | 1.349360e-06                    | 0.000000e+00            |     | 1.027560e-05                      | -8.333330e-08       |      | -8.006410e-05 |
| surlag_07         | 0.000000e+00             | 7.371800e-06                    | 7.051280e-07            |     | 5.253210e-06                      | -8.974360e-07       |      | -5.518270e-04 |
| surlag_08         | 0.000000e+00             | -3.205130e-09                   | 0.000000e+00            |     | 4.230770e-07                      | 0.000000e+00        |      | 0.000000e+00  |
| surlag_09         | 0.000000e+00             | 1.025640e-07                    | 0.000000e+00            |     | 1.570510e-07                      | 0.000000e+00        |      | 8.974360e-07  |
| surlag_10         | 0.000000e+00             | -2.019230e-07                   | 0.000000e+00            |     | -1.185900e-07                     | 0.000000e+00        |      | -2.756410e-06 |
| surlag_11         | 0.000000e+00             | 2.756410e-06                    | 0.000000e+00            |     | 4.198720e-07                      | 0.000000e+00        |      | -2.410260e-04 |
| surlag_12         | 0.000000e+00             | 1.394230e-06                    | 0.000000e+00            |     | 9.743580e-07                      | 0.000000e+00        |      | -2.301600e-04 |
| surlag_13         | 0.000000e+00             | -1.057690e-07                   | 0.000000e+00            |     | 2.323720e-06                      | 0.000000e+00        |      | -1.111860e-04 |
| surlag_14         | 0.000000e+00             | -1.121800e-06                   | 0.000000e+00            |     | 2.820510e-07                      | 0.000000e+00        |      | 2.051280e-05  |
| surlag_15         | 0.000000e+00             | 0.000000e+00                    | 0.000000e+00            |     | 7.852560e-07                      | 0.000000e+00        |      | -1.794870e-05 |
| surlag_16         | 0.000000e+00             | 0.000000e+00                    | 0.000000e+00            |     | 9.294870e-07                      | 0.000000e+00        |      | 0.000000e+00  |
| surlag_17         | 0.000000e+00             | -7.083340e-07                   | 0.000000e+00            |     | -5.352560e-07                     | 0.000000e+00        |      | -3.493590e-05 |
| surlag_18         | 0.000000e+00             | 2.532050e-06                    | -9.615390e-08           |     | 1.666670e-06                      | 8.012820e-08        |      | -3.967950e-04 |
| surlag_19         | 0.000000e+00             | 1.432690e-06                    | 0.000000e+00            |     | -5.608980e-07                     | 0.000000e+00        |      | -1.336220e-04 |
| surlag_20         | 0.000000e+00             | -2.820510e-06                   | -1.602560e-07           |     | 6.801280e-06                      | 1.698720e-07        |      | -1.630030e-03 |
| surlag_21         | 0.000000e+00             | -1.166670e-05                   | 0.000000e+00            |     | -2.291670e-06                     | -8.653850e-08       |      | 3.615380e-03  |
| surlag_22         | 0.000000e+00             | -3.794870e-06                   | -1.282050e-07           |     | 1.294870e-06                      | 1.698720e-07        |      | 2.864550e-03  |
| surlag_23         | 0.000000e+00             | 7.852560e-07                    | 0.000000e+00            |     | -3.397440e-07                     | 0.000000e+00        |      | -5.413460e-05 |

Continued on next page

| control file name | pretreat ET-precip ratio | pretreat discharge-precip ratio | post-treat precip ratio | ET- | post-treat discharge-precip ratio | post-treat ET ratio | diff | NSE           |
|-------------------|--------------------------|---------------------------------|-------------------------|-----|-----------------------------------|---------------------|------|---------------|
| surlag_24         | 0.000000e+00             | 1.032050e-06                    | 0.000000e+00            |     | -2.849360e-06                     | 0.000000e+00        |      | -2.788450e-06 |
| surlag_25         | 0.000000e+00             | -1.064100e-06                   | 0.000000e+00            |     | -6.442310e-07                     | 6.410260e-09        |      | -2.897440e-05 |
| surlag_26         | 0.000000e+00             | 0.000000e+00                    | 0.000000e+00            |     | 4.166670e-07                      | 0.000000e+00        |      | 0.000000e+00  |
| surlag_27         | 0.000000e+00             | -9.551290e-07                   | 0.000000e+00            |     | 2.134620e-06                      | 3.365380e-07        |      | 9.198740e-06  |
| surlag_28         | 0.000000e+00             | -1.060900e-06                   | 0.000000e+00            |     | 1.272440e-06                      | -9.615380e-09       |      | 3.221150e-05  |
| surlag_29         | 0.000000e+00             | 0.000000e+00                    | 0.000000e+00            |     | -4.166670e-08                     | 0.000000e+00        |      | 0.000000e+00  |
| surlag_30         | 0.000000e+00             | 0.000000e+00                    | 0.000000e+00            |     | 0.000000e+00                      | 0.000000e+00        |      | 0.000000e+00  |
| surlag_31         | 0.000000e+00             | 0.000000e+00                    | 0.000000e+00            |     | -4.487180e-07                     | 0.000000e+00        |      | 0.000000e+00  |
| surlag_32         | 0.000000e+00             | 7.243590e-06                    | 6.410260e-08            |     | 3.746790e-06                      | -8.974360e-08       |      | -7.181730e-04 |
| surlag_33         | 0.000000e+00             | 3.685900e-06                    | 0.000000e+00            |     | 2.006410e-06                      | 0.000000e+00        |      | -1.766020e-04 |
| surlag_34         | 0.000000e+00             | -2.820510e-06                   | -4.871800e-06           |     | 3.028850e-06                      | 6.019230e-06        |      | 7.596150e-05  |
| surlag_35         | 0.000000e+00             | 1.987180e-06                    | 0.000000e+00            |     | -2.958330e-06                     | 0.000000e+00        |      | 9.923080e-05  |
| surlag_36         | 0.000000e+00             | 1.250000e-06                    | 0.000000e+00            |     | -1.266030e-06                     | 0.000000e+00        |      | 2.375000e-05  |
| surlag_37         | 0.000000e+00             | 1.217950e-06                    | 0.000000e+00            |     | 1.080130e-06                      | 0.000000e+00        |      | -2.403850e-05 |
| surlag_38         | 0.000000e+00             | 2.016030e-06                    | 0.000000e+00            |     | -2.092950e-06                     | -8.012820e-08       |      | -2.055770e-04 |
| surlag_39         | 0.000000e+00             | 3.365390e-07                    | 0.000000e+00            |     | 1.538460e-07                      | 7.692310e-08        |      | -8.477560e-05 |
| surlag_40         | 0.000000e+00             | 1.432690e-06                    | 0.000000e+00            |     | 9.006410e-07                      | 0.000000e+00        |      | -1.401600e-04 |
| surlag_41         | 0.000000e+00             | 1.080130e-06                    | 0.000000e+00            |     | 8.141020e-07                      | 0.000000e+00        |      | -2.275640e-05 |
| surlag_42         | 0.000000e+00             | 3.766030e-06                    | 6.410260e-07            |     | 9.935870e-08                      | -8.301280e-07       |      | -2.014740e-04 |
| surlag_43         | 0.000000e+00             | 1.589740e-06                    | 0.000000e+00            |     | -9.038460e-07                     | -8.012820e-08       |      | -5.455130e-05 |
| surlag_44         | 0.000000e+00             | -1.134620e-06                   | 0.000000e+00            |     | -1.307690e-06                     | 0.000000e+00        |      | 1.830130e-05  |
| surlag_45         | 0.000000e+00             | 2.016030e-06                    | 0.000000e+00            |     | -6.634610e-07                     | 0.000000e+00        |      | -6.570510e-06 |

Continued on next page



| control file name | pretreat ET-precip ratio | pretreat discharge-precip ratio | post-treat precip ratio | ET- | post-treat discharge-precip ratio | post-treat ET diff | NSE           |
|-------------------|--------------------------|---------------------------------|-------------------------|-----|-----------------------------------|--------------------|---------------|
| surlag_46         | 0.000000e+00             | 9.551280e-07                    | 0.000000e+00            |     | 1.378210e-06                      | 0.000000e+00       | -2.583330e-05 |
| surlag_47         | 0.000000e+00             | 2.483970e-06                    | 0.000000e+00            |     | -6.762820e-07                     | 0.000000e+00       | -5.301280e-05 |
| surlag_v          | 0.000000e+00             | 8.794710e-06                    | -7.115380e-08           |     | 8.661920e-06                      | 7.451920e-09       | -1.584520e-03 |
| topt_frzd         | 0.000000e+00             | 0.000000e+00                    | 0.000000e+00            |     | 0.000000e+00                      | 0.000000e+00       | 0.000000e+00  |
| topt_frse         | 0.000000e+00             | 0.000000e+00                    | 0.000000e+00            |     | 0.000000e+00                      | 0.000000e+00       | 0.000000e+00  |
| topt_rnge         | 8.586620e-05             | -9.397310e-06                   | 6.827270e-05            |     | -1.045800e-05                     | -2.014250e-05      | 5.360310e-04  |
| trnsrch_v         | 0.000000e+00             | -3.743930e-02                   | 0.000000e+00            |     | -4.141160e-02                     | 0.000000e+00       | 1.602380e-01  |
